# Supplementary material for: In vivo RNA interactome profiling reveals 3’UTR-processed small RNA targeting a central regulatory hub
Source: Research Square preprint supplement (doi:10.21203/rs.3.rs-3125059/v1), 2023-07-24
Supplement: Supplementary file 1 [file 11175a4ee2cce848d3f58c9c.xlsx]

## Sheet: Sheet1
Table S6. List of processed RNA related to Figure 3G
sRNA	Main ribonuclease involved in processing	References
ArcZ	RNase E	(Papenfort et al., 2009; Mandin and Gottesman, 2010; Chao et al., 2016)
CpxQ (STnc870)	RNase E	(Chao and Vogel, 2016; Grabowicz et al., 2016)
FlgO (STnc840)	RNase E	(Chao et al., 2012; Chao et al., 2016; Melamed et al., 2021)
GlnZ (STnc800)	RNase E	(Walling et al., 2022; Miyakoshi et al., 2022)
MalH (STnc810)	RNase E	(Iosub et al., 2021)
NarS (STnc2040)	RNase E	(Wang et al., 2020)
OppZ	RNase E	(Hoyos et al., 2020)
RaiZ (STnc2090)	RNase E	(Chao et al., 2012, Holmqvist et al., 2018, Smirnov et al., 2017; Westermann et al., 2019)
RprA	RNase E	(Chao et al., 2016; Bandyra et al., 2018)
RybD	RNase E	(De Mets et al., 2019; Miyakoshi et al., 2019)
SroC	RNase E	(Vogel et al., 2003; Fuentes et al., 2015; Miyakoshi et al., 2015)
