# Supplementary material for: In vivo RNA interactome profiling reveals 3’UTR-processed small RNA targeting a central regulatory hub
Source: Research Square preprint supplement (doi:10.21203/rs.3.rs-3125059/v1), 2023-07-24
Supplement: Supplementary file 2 [file 2dd904622487aa263b250cec.xlsx]

## Sheet: Table S5
Table S4. Number of reads in in sequencing libraries
Library name	Total number of mapped reads	Mapped as singleton reads	Mapped as chimeric reads	% of chimeric reads out of mapped reads	Number of reads in S-chimeras	% of reads in S-chimeras out of chimeric reads	Number of S-chimeras	Number of S-chimeras excluding rRNAs and tRNAs
Hfq-Flag_OD0.5_Replicate1	26899225	26342902	556323	0.0206817	65913	0.11848	1137	332
Hfq-Flag_OD0.5_Replicate2	26176677	25675803	500874	0.0191344	53964	0.10774	1092	236
Hfq-Flag_OD2.0_Replicate1	29875381	29158897	716484	0.0239824	114973	0.160468	1559	798
Hfq-Flag_OD2.0_Replicate2	5177389	5033546	143843	0.0277829	24230	0.168448	516	320
Hfq-Flag_OD2.0+3h_Replicate1	21182697	20489100	693597	0.0327436	182204	0.262694	2621	1934
Hfq-Flag_OD2.0+3h_Replicate2	8420523	8154856	265667	0.0315499	45186	0.170085	840	481
WT-Flag_OD0.5_Replicate1	10121491	9923906	197585	0.0195213	16192	0.0819495	403	5
WT-Flag_OD0.5_Replicate2	11468631	11203572	265059	0.0231117	20571	0.0776091	475	9
WT-Flag_OD2.0_Replicate1	7708731	7527011	181720	0.0235733	14296	0.0786705	412	20
WT-Flag_OD2.0_Replicate2	1759278	1722886	36392	0.0206858	1392	0.0382502	77	1
WT-Flag_OD2.0+3h_Replicate1	2088172	2043651	44521	0.0213206	2473	0.0555468	68	0
WT-Flag_OD2.0+3h_Replicate2	1883795	1840972	42823	0.0227323	3472	0.0810779	142	0
Hfq-Flag_T4_Replicate1	7671514	7391975	279539	0.0364386	71817	0.256912	825	681
Hfq-Flag_T4_Replicate2	4310731	4165225	145506	0.0337544	42052	0.289005	526	473
Hfq-Flag_ctrl_Replicate1	1497706	1474261	23445	0.0156539	1574	0.0671358	26	0
Hfq-Flag_ctrl_Replicate2	1215585	1198751	16834	0.0138485	380	0.0225734	15	0
WT-Flag_T4_Replicate1	340775	332459	8316	0.0244032	535	0.0643338	2	0
WT-Flag_T4_Replicate2	284116	278426	5690	0.020027	418	0.0734622	7	0
WT-Flag_ctrl_Replicate1	386060	380076	5984	0.0155002	84	0.0140374	8	0
WT-Flag_ctrl_Replicate2	305679	300988	4691	0.0153462	21	0.00447666	2	0
