# Supplementary material for: In vivo RNA interactome profiling reveals 3’UTR-processed small RNA targeting a central regulatory hub
Source: Research Square preprint supplement (doi:10.21203/rs.3.rs-3125059/v1), 2023-07-24
Supplement: Supplementary file 3 [file 6a75543b0e95b4a1164ab599.xlsx]

## Sheet: Sheet1
Table S3. Oligonucleotides used in this study.
Name	Sequence (5' to 3')	Comments
YCO-0899	GCAGGGGTCTACTGCGCAACAGGACAGCGAAGAGACTGAAGACTACAAAGACCATGACGG	Sense oligo to add C-term 3xFLAG to hfq in Salmonella, based on pSUB11
YCO-0900	GATTATCCGACGCCCCCGACATGGATAAACAGCGCGTGAACGGTCCATATGAATATCCTCCTTAG	Antisense oligo to add C-term 3xFLAG to hfq in Salmonella, based on pSUB11
YCO-0901	GCGGCGCCAGCAATAACTAC	Sense oligo to verify hfq-3xFLAG in STM
YCO-0902	CTCACCGGCATCATAACGGTC	Antisense oligo to verify hfq-3xFLAG in STM
YCO-0453	GGAGAAACAGTAGAGAGTTGC	Antisense to -1 region of pBAD promoter in vector pBAD myc-His A
YCO-0454	TTTTCTAGATTAAATCAGAACGCAGA	Sense to upstream terminator region in vector pBAD myc-His A
YCO-0557	GGCGGAAAGTCCAAATTGTAATG	pZE12-luc cloning: sense primer covering XbaI site
YCO-0558	GTGCTCAGTATCTTGTTATCCGC	pZE12-luc cloning starts with -1 upstream into promoter region
YCO-0905	AAGCTTACTAAGAAGGAGATATACATATGCAAGAACTTTTTAAC	Sense oligo to amplify T4 RNA ligase from pKH13-t4rnl1, adding HindIII site
YCO-0906	GTTTTCTAGATTAGTGGTGGTGGTGGTGGTGGTATCCTTCTGGGATAAATTTTTTATAATTTTTC	Antisense oligo to amplify T4 RNA ligase from pKH13-t4rnl1, adding 6xHis tag-TAA and XbaI site
YCO-1029	TTTTCCTTGCCATAGACACC	Sense oligo to clone cpxQ into pZE12, with blunt end
YCO-0526	GTTTTCTAGACGAACTTGTGACGCTCACG	Antisense oligo to clone cpxQ into pZE12, with XbaI site
YCO-1211	GTGCGGCCTGAAAACAGGAC	Sense oligo to clone arcZ into pZE12, with blunt end
YCO-1212	GTTTTCTAGAGTGCTGAAAGCCTGGGTGG	Antisense oligo to clone arcZ into pZE12, with XbaI site
YCO-1290	AGTAACGGATTACTTTGTGGTGTAGC	Sense oligo to clone pinT into pZE12, with blunt end
YCO-1291	GTTTTCTAGAGTCTCTTCGGAGGCCTGC	Antisense oligo to clone pinT into pZE12, with XbaI site
YCO-1679	GAAAGACGCGCATTTGTTATCATCATC	Sense oligo to clone micA into pZE12, with blunt end
YCO-1680	GTTTTCTAGAGTGGCTTGCAAAACACGCC	Antisense oligo to clone micA into pZE12, with XbaI site
YCO-1772	ATTTACCTGCCCGCCAGATTTC	Sense oligo to clone STnc970 into pZE12, with blunt end
YCO-1773	GTTTTCTAGAGACGTTAGAAGACGGGCTTGC	Antisense oligo to clone STnc970 into pZE12, with XbaI site
YCO-1774	ATTAAGACAGTTTAGGGATACCCTCC	Sense oligo to clone STnc3530 into pZE12, with blunt end
YCO-1775	GTTTTCTAGAGAGATCGAAGTCGAATAGTCAACG	Antisense oligo to clone STnc3530 into pZE12, with XbaI site
YCO-1776	ATAATTATAAAAAATTAAGTATGCCACTTAGGGCG	Sense oligo to clone STnc1010 into pZE12, with blunt end
YCO-1777	GTTTTCTAGACCTGACAACTTTTCCCAAACATC	Antisense oligo to clone STnc1010 into pZE12, with XbaI site
YCO-1778	ATAGCAGTTATGAGTATGCGTGTTTC	Sense oligo to clone STnc770 into pZE12, with blunt end
YCO-1779	GTTTTCTAGACCATGCGTGTCACAAAGTC	Antisense oligo to clone STnc770 into pZE12, with XbaI site
YCO-1827	TTTATCGAAGTACCTGCCCG	Sense oligo to clone malH into pZE12, with blunt end
YCO-1781	GTTTTCTAGATTAGCCGCTGTCTATAACGC	Antisense oligo to clone malH into pZE12, with XbaI site
YCO-1828	ATAAAACCCTGCCTTGCCACC	Sense oligo to clone chiQ-3UTR into pZE12, with blunt end
YCO-1829	TTTTCTAGACGGCGATGCTGTTTGTACGTC	Antisense oligo to clone chiQ-3UTR into pZE12, with XbaI site
YCO-1362	CGCGAATACTGCGCCAAC	Antisense oligo to detect ArcZ sRNA for RT-PCR, used with YCO-1211
YCO-0659	CGGTGGCTAATACCGCATAACG	Sense oligo to amplify 16S rRNA for RT-PCR
YCO-0660	TGGTCATCCTCTCAGACCAGC	Antisense oligo to amplify 16S rRNA for RT-PCR
YCO-1361	CTGAGCGCTGCTATGCATTTGACC	Sense oligo to the 5'UTR of flhD, RT-PCR for the detection of chimera products of flhD-ArcZ, used with YCO-1362
YCO-1363	CTGAATGCACAGCATTAACCAGGTCAG	Sense oligo to the 5'UTR of lrhA, RT-PCR for the detection of chimera products of lrhA-ArcZ, used with YCO-1362
YCO-1423	GGACTTACTTGAAGCACATTTGAGG	Sense oligo to the 5'UTR of ompX, RT-PCR for the detection of chimera products of ompX-CyaR
YCO-1422	CAAGGAGGTGGTTCCTGGTAC	Sense oligo to CyaR, RT-PCR for the detection of chimera products of ompX-CyaR
QGO-1649	CAGCCAACAAAGAGGCTGCGCGAATTATGACGGGAAACAGGTGTAGGCTGGAGCTGCTTC	Sense to delete FadZ of SL1344
QGO-1650	CTGACCAAAGCGCTTACTGAGTAGAGCAGGCCATACGGTGCATATGAATATCCTCCTTAG	Antisense to delete FadZ of SL1344
QGO-1587	CCCGTCTGGTATGATGAGTGCAACTATGTTTTGCTGTGTAGTGTAGGCTGGAGCTGCTTC	Sense to delete fadR of SL1344
QGO-1588	TGCTGCCCGGTAGTGTTTGCGCTTACCGGGCATCGCGGGACATATGAATATCCTCCTTAG	Antisense to delete fadR of SL1344
QGO-1589	AACACAGAGAGTAGCGAGCG	Sense to check fadR of SL1344
QGO-1590	TGCATCGGTTATGGGGCTTT	Antisense to check fadR of SL1344
QGO-1599	CTCTGCCGAGCGTGATCACATCGGCATTTCTTTAATCATTGTGTAGGCTGGAGCTGCTTC	Sense to delete fadBAZ of SL1344
QGO-2391	TTTTATAGAGCGCGGCCAGT	Sense to check fadBAZ of SL1344
QGO-2392	ATACATGGTGCGCGTGGATA	Antisense to check fadBAZ of SL1344
QGO-2231	ATAAAAAAGCAATAAAGGCATATAACAGAGGGTTAATAACGTGTAGGCTGGAGCTGCTTC	Sense to delete ompC of SL1344
QGO-2232	AAAAAGGGCCCGCAGGCCCTTTAGCAACATCTTTTGCTGACATATGAATATCCTCCTTAG	Antisense to delete ompC of SL1344
QGO-2233	AATGGACTTGCCGACTGGTT	Sense to check ompC of SL1344
QGO-2234	ACGCCGGAATAAGGCATGAA	Antisense to check ompC of SL1344
QGO-2235	GTTGAGGAAACACGCTAAGAAAATTATAAGGATTATTAAAGTGTAGGCTGGAGCTGCTTC	Sense to delete ompD of SL1344
QGO-2236	GCCCTGAAAGGACTGGCTTTGTATTCAGACTACAACAAAACATATGAATATCCTCCTTAG	Antisense to delete ompD of SL1344
QGO-2237	CTGCCATTGACAAACGCCTC	Sense to check ompD of SL1344
QGO-2238	GTCTGCACGGCATACTCCTT	Antisense to check ompD of SL1344
QGO-2481	TCTGGCTCTGGAGACAGCTTATAACAGAGGATAACCGCGCGTGTAGGCTGGAGCTGCTTC	Sense to delete CRP of SL1344
QGO-2482	ACAAAAATGGCGCATGATAAAACGCGCCATTCTGACGGAACATATGAATATCCTCCTTAG	Antisense to delete CRP of SL1344
QGO-2483	GACACACGGCGAAAGCTATG	Sense to confirm CRP deletion
QGO-2484	GGGGTATCCAGACCTGCAAT	Antisense to confirm CRP deletion
QGO-1620	TTAGTTGCCGTTTTTCCCGCCCGTCAGGGGCGGGTTTTTTCTAGAGGTG	Sense oligo to clone fadZ into pZE12, with XbaI site
QGO-1621	CACCTCTAGAAAAAACCCGCCCCTGACGGGCGGGAAAAACGGCAACTAA	Antisense oligo to clone fadZ into pZE12, with XbaI site
QGO-2294	GCCACTGCTTTTCTTTGATG	Sense oligo to clone rybB into pZE12, with blunt end
QGO-2295	CACCTCTAGAAAAAACCCACCAACCTTGAA	Antisense oligo to clone rybB into pZE12, with XbaI site
QGO-1600	CCGCTCGAGATCGCCCCACGAGAGCGTGA	Sense oligo to clone fadBAZ/fadBA into pZE12, with Xhol1 site
QGO-1601	AGACCTAGGCGCATTTACCAGCTTGCCTA	Antisense oligo to clone fadBA into pZE12, with XbaI site
QGO-2457	TTAGTTGCGGTTTTTCCCGCCCGTCAGGGGCGGGTTTTTTCTAGAGGTG	Sense oligo to clone fadZ-M into pZE12 with XbaI site
QGO-2458	CACCTCTAGAAAAAACCCGCCCCTGACGGGCGGGAAAAACCGCAACTAA	Antisense oligo to clone fadZ-M into pZE12 with XbaI site
QGO-1583	CCAATGCATGCCGACTGGTTAATGAGGGT	sense, +1 site of SL1344 ompC, with BfrBI/NsiI sites
QGO-1584	CCAATGCATGCCATTGACAAACGCCTCGTTT	sense, +1 site of SL1344 ompD, with BfrBI/NsiI sites
QGO-1574	CCAATGCATATATATGCGTTTCCGATAGT	sense, +1 site of SL1344 ompN, with BfrBI/NsiI sites
QGO-2316	CCAATGCATCATATTCATATAAATTATTAT	sense, +1 TSS site of SL1344 ompS, with BfrBI/NsiI sites
QGO-2310	CTAGCTAGCAAACAGGTCTAATTTGTTGCC	antisense, translational fusion to 35th aa of SL1344 ompC, with NheI site
QGO-2311	CTAGCTAGCGTACAGATCCAGTTTATTGC	antisense, translational fusion to 35th aa of SL1344 ompD, with NheI site
QGO-2312	CTAGCTAGCGTAAAGGTCCAGTTTGTTGC	antisense, translational fusion to 35th aa of SL1344 ompN, with NheI site
QGO-2315	CTAGCTAGCGTACAGGTCGAGTTTGTTGC	antisense, translational fusion to 35th aa of SL1344 ompS, with NheI site
QGO-2851	CTAGCTAGCAAACAGGTCTAATTTGTTGCGGTCTTTAT	Antisense oligo to mutate +85 G to C in ompC-35aa
QGO-2849	CTAGCTAGCGTACAGATCCAGTTTATTGCGGTCTTTGT	Antisense oligo to mutate +85 G to C in ompD-35aa
QGO-2681	TTATTTGCATTTTTTTAACACAAAATACACACTTCGCTTCGTGTAGGCTGGAGCTGCTTC	Sense oligo to clone PfadBA-LacZ
QGO-2445	ATTATTGAACTTATGCCACTCCGTCATTTAAAAATAGTCTGTGTAGGCTGGAGCTGCTTC	Sense oligo to clone PompD -LacZ
QGO-2837	AAAGTTGCCGTTTTTCCCGC	Sense oligo to clone pZE12-FadBAZ(UUU>CCC)
QGO-2838	ACTGTTTCCCGTCATAATT	Antisense oligo to clone pZE12-FadBAZ(UUU>CCC)
QGO-2193	AACCGTACTGAAAGCCAGGG	Sense oligo for SL1344 ompD qPCR
QGO-2194	ATGTCGTAAGCAACGCCGTA	Antisense oligo for SL1344 ompD qPCR
