# Supplementary material for: In vivo RNA interactome profiling reveals 3’UTR-processed small RNA targeting a central regulatory hub
Source: Research Square preprint supplement (doi:10.21203/rs.3.rs-3125059/v1), 2023-07-24
Supplement: Supplementary file 4 [file b430542b068538984f3d9d73.xlsx]

## Sheet: Legend
Table S5. List of S-Chimeras from Hfq::3xFLAG libraries at three growth stages ( ≥10 chimeric reads)
RNA1 name: Common name of RNA1 mapped to the genomic
RNA2 name: Common name of RNA2 mapped to the genomic
RNA1 Strand: The strand RNA1 was mapped to
RNA1 from: Position of the first nucleotide of the most 5' chimera mapped to RNA1.
RNA1 to: Position of the first nucleotide of the most 3' chimera mapped to RNA1.
RNA1 ligation from: Position of the last nucleotide of the most 5' chimera mapped to RNA1.
RNA1 ligation to: Position of the last nucleotide of the most 3' chimera mapped to RNA1.
RNA2 Strand: The strand RNA2 was mapped to
RNA2 from: Position of the last nucleotide of the most 5' chimera mapped to RNA2.
RNA2 to: Position of the last nucleotide of the most 3' chimera mapped to RNA2.
RNA2 ligation from: Position of the first nucleotide of the most 5' chimera mapped to RNA2.
RNA2 ligation to: Position of the first nucleotide of the most 3' chimera mapped to RNA2.
Number of interactions: Number of chimeras supporting the interaction.
Odds Ratio: (K/L)/(M/N), where K= Number of chimeric fragments of RNA1-RNA2, L=number of other fragments involving RNA2, M=number of other fragments involving RNA1, N=number of all other fragments (that do not involve RNA1 and RNA2).
Fisher's exact test p-value: p-value for observing at least this number of chimeric fragments given their background frequencies on Hfq. The Odds Ratio provides the effect size of the test.
RNA1 type: The genomic annotation of RNA1
RNA2 type: The genomic annotation of RNA2
RNA1 seq: RNA1 start was taken from the coordinate termed "RNA1 from" and RNA1 end was taken the coordinate termed "RNA1 ligation to". If "RNA1 ligation to" was not identified, RNA1 end was taken 20 nucleotides downstream the coordinate termed "RNA1 to".
RNA2 seq: RNA2 start was taken the coordinate termed "RNA2 ligation from" and the end was taken at coordinate of "RNA2 to". If "RNA2 ligation from" was not identified, RNA2 start was taken 20 nucleotides upstream the coordinate termed "RNA2 from"

## Sheet: OD0.5
RNA1 name	RNA2 name	RNA1 Strand	RNA1 from	RNA1 to	RNA1 ligation from	RNA1 ligation to	RNA2 Strand	RNA2 from	RNA2 to	RNA2 ligation from	RNA2 ligation to	Number of interactions	Odds Ratio	Fisher's exact test p-value	RNA1 type	RNA2 type	RNA1 seq	RNA2 seq
ackA(SL1344_2306)	RybD(ncRNA0062)	+	2445524	2445646	2445659	2445668	+	807420	807434	807345	807397	443	4431.69	0	5UTR	sRNA	AGGTATTTCTTCCATCATGCCCAAAAAAACTCCTGCGCATGATGTTAATCATAAATGTCAGGGCTATCATGCGCTACGCTCTATGGCTCACTGACGTTTTTTTAGCCACGTATCATAAATAGGTACTTCCATGTCGAGTAAGTTA	ATTATAAAATAAAACTCGCTGTTCCTGCGGGAACAGATAAATGTCCGTTTTCGACATGGTTGGCCACCTTTACGGTGGCCTTTTTTATGG
acpP(SL1344_1133)	MgrR(ncRNA0043)	+	1236144	1236159	1236181	1236185	+	1550787	1550844	1550762	1550766	40	39.1516	1.5e-29	5UTR	sRNA	ATAACGTAAAATCGTGGTAAGACCTGCCGGGATTTAGTTGCA	AGAATTTGCCCGGTAGCGTATAAGCAAAACACAAATCTATCCATGCAAGCATTTACCGCTGGTGAACCGGCGGTTTTTTTTTG
alaS(SL1344_2807)	DsrA(ncRNA0011)	-	2996577	2996590	2996533	2996554	-	2026215	2026222	2026277	2026279	13	58.5304	5.55e-19	CDS	sRNA	ATTTCAGGATAATTATGAGCAAGAGCACCGCTGAGATCCGTCAGGCGTTTCTCGACTT	CGAATTTTCAAGTGCTTCTTGCATAAGCAAGTTTGATCCCGACCCGTAGGGCCGGGATTTTTTTC
amiA(SL1344_2413)	Spf(ncRNA0075)	+	2557939	2557985	2557986	2558031	+	4230535	4230614	4230508	4230546	68	16.6608	1.37e-21	5UTR	sRNA	TGTGTCACGTATTGAAATGAAAAGTAAAACAATTCTCATCACCAACCGTCGTAACGGATTACGCGATACGATATAACATCTTGAACTTAATTT	GTACAGAGGTAAGATGTTCTATCTTTCAGACCTTTTACTTCACGTAATCGGATTTGGCTGAATATTTTAGCCGCCCCAGTCAGTTTATGACTGGGGCGTTTTTTATT
amiA(SL1344_2413)	ArcZ(ncRNA0002)	+	2558037	2558076	2558099	2558102	+	3511916	3511917	3511860	3511860	10	33.2454	1.64e-12	CDS	sRNA	ACTCAGGCCGTATGAGCACTTTTAAACTCCTAAAAACTCTCACATCGCGCCGCCAGGTACTCAAAA	ATTTCCCTGGTGTTGGCGCAGTATTCGCGCACCCCGGTCAAACCGGGGTCATTTTTTT
ampG(SL1344_0438).cyoA(SL1344_0437).IGR	Spf(ncRNA0075)	-	497949	498005	497926	497926	+	4230588	4230612	4230543	4230559	30	28.0387	1.38e-27	IGR	sRNA	TTTTGTGCGCAACAGAATTTTGGAAATTATTGGTAATTTCTACGCTACCTATTTTCTTTACACGATTCAGCCGATTAAAT	TACTTCACGTAATCGGATTTGGCTGAATATTTTAGCCGCCCCAGTCAGTTTATGACTGGGGCGTTTTTTA
ansA(SL1344_1229).nam(SL1344_1228).IGR	MgrR(ncRNA0043)	-	1328629	1328704	1328603	1328667	+	1550838	1550844	1550764	1550765	14	3086.26	1.1e-35	IGR	sRNA	GATTCGTAGCGCGATGGCGCAAAACTTGCGTGGTGAATTGACGCCGGATGATTAAAAAATCCCGACGACAAGGAGAAGATAATGACAAACCGGGCCTTATTA	AATTTGCCCGGTAGCGTATAAGCAAAACACAAATCTATCCATGCAAGCATTTACCGCTGGTGAACCGGCGGTTTTTTTTTG
apt(SL1344_0476)	RprA(ncRNA0058)	+	539703	539736	539755	539783	-	1401681	1401687	1401731	1401733	46	4452.73	9.33e-144	CDS	sRNA	ACACCGTACTTAGCAGGCATATATCCATGACCGCGACTGCACAGCAGCTTGAGTTTCTCAAAAACAGCATCAAAAGCATTC	CGAATTGCTGTGTGTAGTCTTTGCCCGTCTCCTACGATGGGCTTTTTTTTTAA
araB(SL1344_0103)	STnc870(ncRNA0205)	-	121320	121326	121267	121290	+	4292565	4292599	4292541	4292544	19	198.583	2.16e-36	CDS	sRNA	CTGTTTTTCTGGATGGAGTAAGACGATGGCAATTGCAATTGGCCTCGATTTTGGCAGTGA	TTTTCCTTGCCATAGACACCATCCCTGTCTTCCCCCACATGATGTGGGGGTTTTTTTTA
araC(SL1344_0104).AS	Spf(ncRNA0075)	-	122242	122244	--	--	+	4230527	4230612	4230501	4230509	19	159.82	1.52e-24	Antisense	sRNA	GGCGACGCTGGCGATATCAAAAT	ACGTAGGGTACAGAGGTAAGATGTTCTATCTTTCAGACCTTTTACTTCACGTAATCGGATTTGGCTGAATATTTTAGCCGCCCCAGTCAGTTTATGACTGGGGCGTTTTTTA
araJ(SL1344_0389)	STnc870(ncRNA0205)	-	444821	445595	444793	445549	+	4292591	4292601	4292540	4292560	93	106.872	5.87e-95	CDS	sRNA	AGCCACAGCGCGCAACATGCGCCTTTATTTTCGGCAGGTGGTATGAAAAAAGTTATTTTTTCTTTGGCGCTGGGTACGTTCGGACTGGGGATGGCCGAGTTTGGCATTATGGGCGTGCTGACGGAGCTGGCACGCGATGTCGGGATAACAATTCCCGCCGCCGGGCATATGATCTCGTTTTACGCCTTCGGCGTCGTGCTGGGCGCGCCTGTTATGGCGCTCTTTTCCAGCCGCTTTTCGCTTAAACATATACTGTTGTTTCTGGTCATGTTGTGCGTGATGGGCAATGCCATATTTACCTTTTCCTCGTCATATCTGATGCTCGCCGTCGGCAGACTGGTTTCCGGCTTTCCGCACGGTGCCTTTTTTGGCGTCGGCGCCATTGTCTTGTCAAAGATT…	GTTTTCCTTGCCATAGACACCATCCCTGTCTTCCCCCACATGATGTGGGGGTTTTTTTTATC
araJ(SL1344_0389)	CyaR(ncRNA0009)	-	445421	445512	445282	445478	+	2228924	2228931	2228850	2228870	11	10.1711	2.31e-08	CDS	sRNA	ACTGGGGATGGCCGAGTTTGGCATTATGGGCGTGCTGACGGAGCTGGCACGCGATGTCGGGATAACAATTCCCGCCGCCGGGCATATGATCTCGTTTTACGCCTTCGGCGTCGTGCTGGGCGCGCCTGTTATGGCGCTCTTTTCCAGCCGCTTTTCGCTTAAACATATACTGTTGTTTCTGGTCATGTTGTGCGTGATGGGCAATGCCATATTTACCTTTTCCTCGTCATA	AAAAACATAACCCATAAATGCTAGCTGTACCAGGAACCACCTCCTTGGCCTGCGTAATCTCCCTTACGCAGGCTTATTTTTT
aroC(SL1344_2353)	GcvB(ncRNA0014)	-	2493329	2493405	2493348	2493351	+	3156913	3156985	3156827	3156874	15	32.1237	2.64e-17	5UTR	sRNA	GTGAACATTTCAATATTTATAAAGATTAAAACACGCAAACGACAACAACGATAACGGA	GCTTTTGGCTTACGGTTGTGATGTTGTGTTGTTGTGTTTGCAATTGGTCTGCGATTCAGACCACGGTAGCGAGACTACCCTTTTTCACTTCCTGTACATTTACCCTGTCTGTCCATAGTGATTAATGTAGCACCGCCATATTGCGGTGCTTTTTTTTGT
aroE(SL1344_3368)	RprA(ncRNA0058)	-	3595541	3595574	3595517	3595517	-	1401683	1401686	1401731	1401738	10	405.866	3.18e-23	CDS	sRNA	GGTAATATGATGGAAACCTATGCTGTTTTTGGAAATCCGATTGCGCACAGCAAATCGC	AACAACGAATTGCTGTGTGTAGTCTTTGCCCGTCTCCTACGATGGGCTTTTTTTTT
artI(SL1344_0866)	RprA(ncRNA0058)	-	960242	960293	960221	960221	-	1401682	1401687	1401730	1401733	18	2710.94	3.84e-54	CDS	sRNA	ACAATGACAATGAAAAAAGTTCTGATTGCCGCGCTAATTGCAGGCTTTAGCCTTTCCGCTACAGCAGCCCAGA	CGAATTGCTGTGTGTAGTCTTTGCCCGTCTCCTACGATGGGCTTTTTTTTTA
artJ(SL1344_0863)	Spf(ncRNA0075)	-	957948	957958	957926	957926	+	4230566	4230612	4230538	4230542	12	43.2594	3.69e-13	5UTR	sRNA	GGCGCATAATCATAAGATTACGGGAGTGACATC	CCTTTTACTTCACGTAATCGGATTTGGCTGAATATTTTAGCCGCCCCAGTCAGTTTATGACTGGGGCGTTTTTTA
atpD(SL1344_3832).atpC(SL1344_3831).IGR	STnc870(ncRNA0205)	-	4095417	4095484	4095391	4095391	+	4292592	4292599	4292541	4292542	13	66.1504	1.37e-19	IGR	sRNA	GGAGCAGGCGTTCTACATGGTCGGTTCCATCGACGAAGCCGTGGAAAAAGCCAAAAAACTTTAACGCCTTAATCGGAGGGTGATATGGCAATGA	TTTTCCTTGCCATAGACACCATCCCTGTCTTCCCCCACATGATGTGGGGGTTTTTTTTA
atpI(SL1344_3839)	Spf(ncRNA0075)	-	4101576	4101582	4101471	4101543	+	4230613	4230614	4230503	4230542	28	3.97111	2.78e-09	CDS	sRNA	GGTTTTAAAGGCGGTGTTTTTGCCGCTGATCGTTACGTGGGTTTTGGTGCTGGTGGTTCAGATACTGGCGCCGGCTGTAATTAACAACAAAGGGTAAAAGGCATCATGGCTT	GTAGGGTACAGAGGTAAGATGTTCTATCTTTCAGACCTTTTACTTCACGTAATCGGATTTGGCTGAATATTTTAGCCGCCCCAGTCAGTTTATGACTGGGGCGTTTTTTATT
bacA(SL1344_3178)	MicF(ncRNA0046)	-	3392116	3392156	3392027	3392093	+	2364720	2364723	2364646	2364678	12	318.626	1.27e-25	CDS	sRNA	GTTATATATGGGGTCTTAACGCGAGATCCATTTTTGCAGTGTTTTTCATTTTAGGGGTTTATTGATGAGCGATATGCACTCGCTGCTGATAGCGGCAATTTTGGGTGTGGTCGAAGGATTGACGGAGTTT	ATTTATTACCGTCATTCACTTCTGAATGTCTGTTTACCCCTATTTCAACCGGATGCTTCGCATTCGGTTTTTTTTACC
brnQ(SL1344_0394)	GcvB(ncRNA0014)	+	452692	452754	452730	452827	+	3156913	3156985	3156803	3156926	18	8.10257	5.04e-11	CDS	sRNA	GGCAAAAATTTTAATGTTTACAACATCACCATCCACAGGCAGTAAGACTTTATGACCCATCAGTTAAAATCGCGCGATATCATCGCCCTGGGCTTTATGACATTTGCGCTGTTCGTTGGCGCAGGCAATATTATCT	TTATCGGAATGCGTGTTCTGATGGGCTTTTGGCTTACGGTTGTGATGTTGTGTTGTTGTGTTTGCAATTGGTCTGCGATTCAGACCACGGTAGCGAGACTACCCTTTTTCACTTCCTGTACATTTACCCTGTCTGTCCATAGTGATTAATGTAGCACCGCCATATTGCGGTGCTTTTTTTTGT
cap(SL1344_3433)	MgrR(ncRNA0043)	+	3637116	3637118	3637147	3637149	+	1550814	1550844	1550764	1550795	29	64.911	4.04e-41	CDS	sRNA	GATAACCGCGCATGGTGCTTGGCAAACCGCAAAC	AATTTGCCCGGTAGCGTATAAGCAAAACACAAATCTATCCATGCAAGCATTTACCGCTGGTGAACCGGCGGTTTTTTTTTG
cap(SL1344_3433)	ArcZ(ncRNA0002)	+	3637194	3637212	3637229	3637237	+	3511915	3511917	3511860	3511861	20	107.138	4.31e-33	CDS	sRNA	AGTACCCGTCAAAGAGCACGCTGATTCACCAGGGTGAAAAAGCA	ATTTCCCTGGTGTTGGCGCAGTATTCGCGCACCCCGGTCAAACCGGGGTCATTTTTTT
cdh(SL1344_4013)	STnc2000(ncRNA0278)	+	4295998	4296010	4296031	4296033	-	1204288	1204293	1204340	1204341	15	3175.85	6.1e-47	5UTR	sRNA	CTATGGGTCACAGGGAACGCATATCATGAAAAAAAC	GAATAAAAAATGATATGCAGTGATGTATGTTTGCCGGGTCGCCCCGGCTTTTTT
celA(SL1344_1247).celB(SL1344_1248).IGR	ChiX(ncRNA0003)	+	1348902	1349027	1349011	1349052	+	555543	555574	555513	555530	65	15.7469	5.31e-28	IGR	sRNA	ATGTTGTACGGCAAGGTAGATGGCTTAGGCGTGCTTAAAGCTGCGGTAGCGGCAATTAAAAAAGCCGCCGCGAATTAATTATTTTTTAATTTTTCCCGTCAAAGAGTTATTTCATACACTAACCGCAATATTTTATTGCGGTATTTAAGGG	GATAATAATAACGATGAAATTCCTCTTTGACGGGCCAATAGCGATATTGGCCATTTTTTTAT
cfa(SL1344_1359)	STnc2110(ncRNA0286)	-	1462375	1462408	1462347	1462362	-	4030645	4030670	4030686	4030700	412	1700.07	0	5UTR	sRNA	GGAACCGGAGCGTTCCCGATTCACCATGGATGGCCTTTTCGGCAAGGGCTCCTCCCTTCCTC	TAAATAGCTAATGAGCTCCTTGCCTTGCCCCGCCAGAGATGGCGGGGCTTTTTTTA
cfa(SL1344_1359)	STnc870(ncRNA0205)	-	1462413	1462446	1462355	1462365	+	4292565	4292600	4292535	4292544	225	34.3406	3.56e-251	5UTR	sRNA	CCGGTTGTTTATATTACGATAATTATTAGGCATTAACGGGAACCGGAGCGTTCCCGATTCACCATGGATGGCCTTTTCGGCAAGGGCTCCTC	ACCCTGTTTTCCTTGCCATAGACACCATCCCTGTCTTCCCCCACATGATGTGGGGGTTTTTTTTAT
cheB(SL1344_1852).cheY(SL1344_1851).IGR	ArcZ(ncRNA0002)	-	1970265	1970273	--	--	+	3511915	3511918	3511861	3511861	13	95.3677	2e-21	IGR	sRNA	CAGGCGATACGTATTTGAACCAGGAGTAG	TTTCCCTGGTGTTGGCGCAGTATTCGCGCACCCCGGTCAAACCGGGGTCATTTTTTTT
cheM(SL1344_3189)	ArcZ(ncRNA0002)	-	3403094	3403104	3403070	3403073	+	3511892	3511919	3511859	3511865	186	2292.15	0	5UTR	sRNA	CTGTATGAGGATATGCAATCCCAGGGAGAAAATAT	GATTTCCCTGGTGTTGGCGCAGTATTCGCGCACCCCGGTCAAACCGGGGTCATTTTTTTTC
ChiX(ncRNA0003)	ygiH(SL1344_3180).gcp(SL1344_3182).IGR	+	555492	555531	555546	555555	+	3393463	3393512	3393451	3393462	54	13.4015	3.56e-40	sRNA	IGR	GATCCGAAGCGAAAGCGTCGGGATAATAATAACGATGAAATTCCTCTTTGACGGGCCAATAGCG	TTGTGGATGCCCGTCGTTTTGCTGTAAACCCGTTGGGGCGGCATGATGTCGCCCCCTTTCTC
ChiX(ncRNA0003)	celA(SL1344_1247).celB(SL1344_1248).IGR	+	555492	555527	555545	555571	+	1349012	1349109	1348981	1348994	41	9.28582	3.33e-25	sRNA	IGR	GATCCGAAGCGAAAGCGTCGGGATAATAATAACGATGAAATTCCTCTTTGACGGGCCAATAGCGATATTGGCCATTTTTT	TATTTTTTAATTTTTCCCGTCAAAGAGTTATTTCATACACTAACCGCAATATTTTATTGCGGTATTTAAGGGTATTTTTCTATGAGTAACGTTATTGCTTCACTTGAAAAGGTACTCCTTCCTTTTGCT
clpB(SL1344_2620)	CyaR(ncRNA0009)	-	2804717	2804792	2804658	2804659	+	2228929	2228932	2228883	2228885	18	92.9732	3.89e-29	CDS	sRNA	AATTTTATTTCGTCAGAGCTGTTTGTTCTGGCGGCGCTTGAGTCTCGCGGCACGTTAACCGATCTGCTGAAATCAGCCGGTGCGACCACGGCCAATATCACTCAGGCAATTGAACAGATGCGCGGAGGTGAAAGC	GAACCACCTCCTTGGCCTGCGTAATCTCCCTTACGCAGGCTTATTTTTTG
cpxR(SL1344_4008)	ArcZ(ncRNA0002)	-	4291713	4291746	4291663	4291675	+	3511913	3511917	3511859	3511863	12	137.268	1.3e-21	CDS	sRNA	GATTTACTTTTGCTTGACGTCATGATGCCGAAGAAAAACGGTATCGATACGTTGAAAGCGCTTCGCCAGACACACCAGACGCCT	GATTTCCCTGGTGTTGGCGCAGTATTCGCGCACCCCGGTCAAACCGGGGTCATTTTTTT
cspD(SL1344_0882)	ArcZ(ncRNA0002)	-	978425	978473	978385	978397	+	3511913	3511919	3511860	3511861	118	1139.23	4.79e-282	CDS	sRNA	CCATTATTCCACCATTCAAATGGATGGTTACAGAACGCTTAAAGCCGGACAGTCTGTCCGGTTTGATGTCCACCAGGGGCCAAAAGGCA	ATTTCCCTGGTGTTGGCGCAGTATTCGCGCACCCCGGTCAAACCGGGGTCATTTTTTTTC
csrA(SL1344_2806)	STnc2110(ncRNA0286)	-	2993734	2993785	2993708	2993711	-	4030646	4030670	4030691	4030703	18	160.835	1.79e-33	5UTR	sRNA	TTTTTGGCGTTATATGATGGATAATGCCGGGATACAGAGAGACCCGACTCTTTTAATCTTTCAAGGAGCAAAGAATGC	CATTAAATAGCTAATGAGCTCCTTGCCTTGCCCCGCCAGAGATGGCGGGGCTTTTTTT
csrA(SL1344_2806).SL1344_2805(SL1344_2805).IGR	ArcZ(ncRNA0002)	-	2992456	2992501	2992309	2992439	+	3511913	3511917	3511860	3511861	25	27.262	4.98e-27	IGR	sRNA	TATTCTCCGTACTTTCAGCGATGAAGATGCAGATAAGATAGTTATAATCACCGCTGGCACCAGGAAGGATAACGTTGCGTCAGCAACGGCCCGAAGGGCGAGCCGTAAGGCGAGTAATCCTCCCGGATGCACCATATTCTCCATACTTTCAGCGATGAAGATGCAGATAAGATAGCGGTAATCACCGCTGGCA	ATTTCCCTGGTGTTGGCGCAGTATTCGCGCACCCCGGTCAAACCGGGGTCATTTTTTT
cyaA(SL1344_3894)	ArcZ(ncRNA0002)	+	4167841	4167886	4167907	4167913	+	3511914	3511919	3511860	3511862	29	85.861	1.05e-44	5UTR	sRNA	GTTTATCCCGAATGGCGACGGTCAAGTACTGACCTGCACCATGACGGGTAGCAACATCAGGCGATACGTCTTG	ATTTCCCTGGTGTTGGCGCAGTATTCGCGCACCCCGGTCAAACCGGGGTCATTTTTTTTC
cycA(SL1344_4331)	GcvB(ncRNA0014)	+	4655331	4655457	4655404	4655541	+	3156867	3156986	3156830	3156926	115	51.1825	1.89e-85	5UTR	sRNA	TTACCTAATATCGATGAGTCCTGATAACAGGATCGTCGTATCATAGACCAAAGGCCGTAGAGCCCGCACAACACAGACAGGTACAGGAAGAAAAACATGGTAGATCAGGTAAAAGTCGCAGCCGACGAACAGGCTCCGGCTGAACAGTCGCTACGGCGCAATCTTACAAACCGTCATATACAGCTTATCGCTATTGGCGGCGCTATTGGTA	TTTGGCTTACGGTTGTGATGTTGTGTTGTTGTGTTTGCAATTGGTCTGCGATTCAGACCACGGTAGCGAGACTACCCTTTTTCACTTCCTGTACATTTACCCTGTCTGTCCATAGTGATTAATGTAGCACCGCCATATTGCGGTGCTTTTTTTTGTA
cyoA(SL1344_0437)	MgrR(ncRNA0043)	-	497564	497598	497532	497533	+	1550830	1550844	1550796	1550798	15	9.90027	1.09e-10	CDS	sRNA	GGTTGTCATTAATTGCAGGCACTGCATTACTCAGTGGCTGTAATTCTGCGCTGCTGGATCCCAAAGG	ATCTATCCATGCAAGCATTTACCGCTGGTGAACCGGCGGTTTTTTTTTG
cysB(SL1344_1645).acnA(SL1344_1644).IGR	RprA(ncRNA0058)	-	1764643	1764681	1764604	1764604	-	1401684	1401687	1401731	1401734	10	265.912	1.91e-21	IGR	sRNA	GTGTCACAAAAATAATATTCGTCTTTTTATTGGCGTTACTGTTTTATTAACGCTGTCTTATTACACCGCAGCAACCGT	ACGAATTGCTGTGTGTAGTCTTTGCCCGTCTCCTACGATGGGCTTTTTTTT
cysM(SL1344_2403)	Spf(ncRNA0075)	-	2550291	2550301	2550267	2550269	+	4230571	4230612	4230539	4230545	20	31.5434	1.7e-19	5UTR	sRNA	CGGGCTTTTTTACGAGCTGAAAACGTGAATACATT	CTTTTACTTCACGTAATCGGATTTGGCTGAATATTTTAGCCGCCCCAGTCAGTTTATGACTGGGGCGTTTTTTA
dcyD(SL1344_1882)	GcvB(ncRNA0014)	-	2000633	2000664	2000569	2000610	+	3156860	3156984	3156801	3156839	42	177.708	3.38e-32	CDS	sRNA	TATTTCCGTTAGATCAACGTGCATAATAAAAAGAACACACCACAACGTTACCGGAGGCTCAATGCCACTACATCACTTAACGCGCTTCCCTCGCCT	TTTTATCGGAATGCGTGTTCTGATGGGCTTTTGGCTTACGGTTGTGATGTTGTGTTGTTGTGTTTGCAATTGGTCTGCGATTCAGACCACGGTAGCGAGACTACCCTTTTTCACTTCCTGTACATTTACCCTGTCTGTCCATAGTGATTAATGTAGCACCGCCATATTGCGGTGCTTTTTTTTG
deoB(SL1344_4496).deoD(SL1344_4497).IGR	STnc870(ncRNA0205)	+	4845698	4845711	4845733	4845735	+	4292568	4292600	4292541	4292545	58	304.956	2.39e-117	IGR	sRNA	ACAAATTTAAAGGGAACTGAAGATGGCAACTCCACATA	TTTTCCTTGCCATAGACACCATCCCTGTCTTCCCCCACATGATGTGGGGGTTTTTTTTAT
djlA(SL1344_0095)	ArcZ(ncRNA0002)	+	108413	108426	108447	108450	+	3511913	3511921	3511859	3511861	31	279.027	9.46e-62	CDS	sRNA	TTTTGGGGAGTCTATGCAGTACTGGGGAAAGATAATTG	GATTTCCCTGGTGTTGGCGCAGTATTCGCGCACCCCGGTCAAACCGGGGTCATTTTTTTTCCG
dnaG(SL1344_3184)	ArcZ(ncRNA0002)	+	3395819	3395869	3395856	3395890	+	3511915	3511918	3511860	3511861	12	41.9627	7.01e-16	CDS	sRNA	GTCATGTTCCCTATTCGGGACAAACGCGGCAGGGTGATTGGTTTTGGCGGTCGAGTACTGGGGAACGACACG	ATTTCCCTGGTGTTGGCGCAGTATTCGCGCACCCCGGTCAAACCGGGGTCATTTTTTTT
dnaN(SL1344_3804)	Spf(ncRNA0075)	-	4064925	4065012	4064904	4064904	+	4230567	4230614	4230537	4230545	55	13.3776	4.57e-30	CDS	sRNA	AATTGAGCAACTGCGTGAAGAAAGCCACGATATCAAAGAAGATTTTTCGAATTTAATCAGAACATTGTCGTCGTGATCCTATGAAATTTACCGTTGAACGTGAACATTT	ACCTTTTACTTCACGTAATCGGATTTGGCTGAATATTTTAGCCGCCCCAGTCAGTTTATGACTGGGGCGTTTTTTATT
emrA(SL1344_2799)	STnc870(ncRNA0205)	+	2984399	2984515	2984521	2984544	+	4292559	4292602	4292534	4292561	579	5419.94	0	CDS	sRNA	AGAAAGGCAAACGCAAAACAGCGCTGCTACTTCTTACCTTGCTCTTTGTTATTATTGCCGTGGCATATGGAATTTATTGGTTTTTAGTATTGCGTCATATTGAAGAGACAGATGATGCTTACGTGGCAGGGAACCAGGTTCAAATC	AACCCTGTTTTCCTTGCCATAGACACCATCCCTGTCTTCCCCCACATGATGTGGGGGTTTTTTTTATCT
emrA(SL1344_2799)	STnc2110(ncRNA0286)	+	2984478	2984487	2984535	2984535	-	4030646	4030654	4030686	4030694	15	115.782	4.52e-26	CDS	sRNA	GTTTTTAGTATTGCGTCATATTGAAGAGACAGATGATGCTTACGTGGCAGGGAACCAG	GCTAATGAGCTCCTTGCCTTGCCCCGCCAGAGATGGCGGGGCTTTTTTT
emrD(SL1344_3766)	SdsR(ncRNA0070)	+	4020935	4020941	--	--	-	1925619	1925668	1925685	1925696	216	26691.4	0	5UTR	sRNA	TCGCATTTATGGGAATGCGCAGCAAGT	CCAACTTTTAGCGCACGGCTCTCTCCCAAGAGCCATTTCCCTGGACCGAATACAGGAATCGTATTCGGTCTCTTTTTA
emrR(SL1344_2798)	MgrR(ncRNA0043)	+	2983619	2983686	2983708	2983715	+	1550825	1550845	1550760	1550799	99	226.317	6.56e-183	CDS	sRNA	TTTTGTATTAATAATACATTTACTTTATTTGTCACTGTCGTTACTATATCGGCTGAAATTAATGAGGTCATGCCCAAATGGATAGTTCGTTTACGCC	CAAGAATTTGCCCGGTAGCGTATAAGCAAAACACAAATCTATCCATGCAAGCATTTACCGCTGGTGAACCGGCGGTTTTTTTTTGC
engA(SL1344_2481)	MgrR(ncRNA0043)	-	2650642	2650709	2650608	2650621	+	1550825	1550843	1550793	1550793	10	20.1314	2.01e-10	CDS	sRNA	TGTTTTTAACAACGGCGTAAAAATGACGCGCGTTGTCTGATGATTTTTTAAATGAGGCTTTAAACATGGTACCTGTGGTCGCGCTTGTCGGGCGCCCTAACG	CAAATCTATCCATGCAAGCATTTACCGCTGGTGAACCGGCGGTTTTTTTTT
eno(SL1344_2931)	rpsI(SL1344_3316)	-	3118833	3118898	3118779	3118780	-	3533761	3533762	--	--	13	114.489	8.22e-23	3UTR	3UTR	GATTCGTATCGAAGAAGCTCTGGGCGAAAAAGCACCGTATAACGGTCGTAAAGAGATCAAAGGCCAGGCGTAATCCTGCTTTTACCTCTTAACGTATAAACCCGCTTCGGCGGGTTTTTT	CCGCTTCGGCGGGTTTTTTTAT
fabA(SL1344_1007)	MgrR(ncRNA0043)	-	1114199	1114307	1114144	1114184	+	1550821	1550845	1550765	1550809	126	41.0152	1.17e-122	3UTR	sRNA	GGTTCTGGTGGATGGTCGTCTGATCTATACCGCACACGATTTGAAAGTCGGTTTGTTCCAGGATACTTCCGCGTTCTAAGTGTTGAATTGATATTCCGCGCTATCGGTATCATGCTTGCAAAGCCCATAAAGGCGAAACCTCCGCACTGCGGAGGTTTCTTTTT	ATTTGCCCGGTAGCGTATAAGCAAAACACAAATCTATCCATGCAAGCATTTACCGCTGGTGAACCGGCGGTTTTTTTTTGC
fbp(SL1344_4348)	Spf(ncRNA0075)	-	4676425	4676442	4676295	4676295	+	4230582	4230612	4230539	4230541	10	9.34615	8.74e-07	CDS	sRNA	AATTCCCGAATGGCGTGAAGAAGTACATCAAATTCTGCCAGGAAGAGGATAGTTCAACAAGTCGCCCTTATACCTCACGTTACATTGGCTCTCTGGTGGCCGATTTCCACCGCAACCTGCTGAAAGGCGGCATCTATCTCTACCCCAG	CTTTTACTTCACGTAATCGGATTTGGCTGAATATTTTAGCCGCCCCAGTCAGTTTATGACTGGGGCGTTTTTTA
feoA(SL1344_3472)	OxyS(ncRNA0050)	+	3685305	3685314	3685340	3685343	-	4364304	4364335	4364351	4364355	11	341.296	1.17e-24	5UTR	sRNA	GTTGATTATTTACTCTTTCCTTCGTTGGCTAAACATCGG	AAATAACTAAAGCCAACGTGAACTTTTGCGGACCTCTGGTCCGCTTTTTTTT
fepA(SL1344_0573)	SdsR(ncRNA0070)	-	643392	643392	--	--	-	1925620	1925631	1925690	1925696	28	1397.67	2.04e-73	5UTR	sRNA	CGCTATGGGACGCGCGAACAC	CCAACTTTTAGCGCACGGCTCTCTCCCAAGAGCCATTTCCCTGGACCGAATACAGGAATCGTATTCGGTCTCTTTTT
Ffs(ncRNA0012)	SL1344_0994(SL1344_0994)	+	523989	524001	524024	524024	-	1098803	1098809	1098842	1098842	14	8.75422	1.89e-09	4.5S_RNA	CDS	CGTGTGCCGGGATGTAGCTGGCAGGGCCCCCACCCA	GGGGGGGCGGAGGTTCAAATCCTCTCGTGCCGACCAAAAT
fhuA(SL1344_0192)	RybB(ncRNA0061)	+	223678	223686	223732	223734	-	941811	941815	--	--	10	55.3934	1.46e-14	5UTR	sRNA	GGTTATAATAATAATTATCGTTTACGTTATCATTCACTTTCATCAGAGATATACCAA	GTTCAAGGTTGGTGGGTTTTTTGTT
fhuA(SL1344_0192)	Spf(ncRNA0075)	+	223688	223750	223767	223792	+	4230578	4230614	4230546	4230559	76	8.41481	1.21e-16	CDS	sRNA	ATAATTATCGTTTACGTTATCATTCACTTTCATCAGAGATATACCAATGGCGCGTCTTAAAACTGCTCAGCCAAACTCCTCACTGCGTAAAATCGCAGTTGTAGT	TTCACGTAATCGGATTTGGCTGAATATTTTAGCCGCCCCAGTCAGTTTATGACTGGGGCGTTTTTTATT
fhuA(SL1344_0192)	MicA(ncRNA0044)	+	223688	223721	223743	223756	+	2989473	2989505	2989428	2989429	13	40.8338	5.1e-17	CDS	sRNA	ATAATTATCGTTTACGTTATCATTCACTTTCATCAGAGATATACCAATGGCGCGTCTTAAAACTGCTCA	GAAAGACGCGCATTTGTTATCATCATCCCTGTTTTCAGCGATGAAATTTTGGCCACTCCGTGAGTGGCCTTTTTCTTT
fklB(SL1344_4330)	Spf(ncRNA0075)	+	4654443	4654486	4654502	4654509	+	4230571	4230612	4230539	4230553	19	20.8461	2.11e-16	CDS	sRNA	GTTTTACCAGAAGAAGCGTGGCTGTTATGCTGCCCGCTACTTTTTTGATATCCGATGAAGGAAAAAT	CTTTTACTTCACGTAATCGGATTTGGCTGAATATTTTAGCCGCCCCAGTCAGTTTATGACTGGGGCGTTTTTTA
fklB(SL1344_4330).AS	ArcZ(ncRNA0002)	-	4655115	4655138	4655083	4655090	+	3511913	3511917	3511859	3511862	43	1382.49	8.2e-106	Antisense	sRNA	GGGGCGCTTACAGAATTTCCAGCAGTTCCACTTCAAACACCAGGGTGCTGAATGGC	GATTTCCCTGGTGTTGGCGCAGTATTCGCGCACCCCGGTCAAACCGGGGTCATTTTTTT
flhD(SL1344_1860)	ArcZ(ncRNA0002)	-	1979678	1979781	1979649	1979671	+	3511893	3511920	3511860	3511862	261	853.63	0	5UTR	sRNA	TCTCAGTGGGAGGCTGCGTTATACGTCACAATGTCCATAATGTCTGAGCGCTGCTATGCATTTGACCTTTTTGCTTCTTTTACCGGGCCTTCCCGGCGACATCACGGGGTGCGGCTACGTCGCACAAAAATAA	ATTTCCCTGGTGTTGGCGCAGTATTCGCGCACCCCGGTCAAACCGGGGTCATTTTTTTTCC
frr(SL1344_0220)	RprA(ncRNA0058)	+	257032	257055	257083	257090	-	1401682	1401687	1401731	1401732	14	409.518	5.44e-32	5UTR	sRNA	CTATTGACGGGTCTTATTACCTGGCAGAAATTAAACGAGACTATACTTAGCACATCTTT	GAATTGCTGTGTGTAGTCTTTGCCCGTCTCCTACGATGGGCTTTTTTTTTA
fruB(SL1344_2183)	udp(SL1344_3922)	-	2305115	2305168	2305068	2305068	+	4197215	4197216	4197164	4197172	13	44200.6	3.38e-54	5UTR	3UTR	TGAAACGTTTCAGCGCGATCTGGTTTTTTTGATAACTCAGATTGGCGCTTTTTTTCTCATAGCGGCTGAATCGTTTCAATTCAGCAGGAGAGGAGACACAT	CTGTAATTCTCCTCTCTTTTGCAAAGGCCGACGCGTTCGGCCTTTTCTTTTTG
gcd(SL1344_0170)	STnc870(ncRNA0205)	-	200618	200660	200593	200611	+	4292563	4292600	4292538	4292553	261	16988.4	0	5UTR	sRNA	AATTCCTATACTTAATTGCTACTAAAAAATTAACAATTTGGGATGGTGTCTTTTTATGGCAGAAAATA	CTGTTTTCCTTGCCATAGACACCATCCCTGTCTTCCCCCACATGATGTGGGGGTTTTTTTTAT
gdhA(SL1344_1234)	GcvB(ncRNA0014)	-	1336839	1336898	1336812	1336853	+	3156913	3156986	3156843	3156930	67	111.428	3.75e-101	5UTR	sRNA	ACTGCAAATACATATTCTGATAAAACGCAAATACAACCACATTAATATATAAGAGGTTTTTATATCTATGGATCAGACATGTTCTCT	TGTGATGTTGTGTTGTTGTGTTTGCAATTGGTCTGCGATTCAGACCACGGTAGCGAGACTACCCTTTTTCACTTCCTGTACATTTACCCTGTCTGTCCATAGTGATTAATGTAGCACCGCCATATTGCGGTGCTTTTTTTTGTA
gidB(SL1344_3840)	ArcZ(ncRNA0002)	-	4102625	4102629	4102587	4102590	+	3511915	3511917	--	--	10	118.401	1.16e-17	CDS	sRNA	GCGTTTTTATGCCTTAAAAGGGCAATTGCCAGGGGATGAAATT	GGTCAAACCGGGGTCATTTTTTT
glmU(SL1344_3829).glmS(SL1344_3828).IGR	GlmZ(ncRNA0016)	-	4092213	4092365	4092200	4092218	+	4163373	4163401	4163300	4163355	226	22.7487	1.75e-159	IGR	sRNA	TGATTTTGTAGGTCGGATAAGCGTCAGCGCCATCCGGCAGACCGGAGATGAGAGGATAAAATAATCCTCCGCTCCATGAGCAGTACTTATAAAAATAACCCCACTCTCTACAAGGCTCGGGGCGCCCGCAACGACGGGCATACAGGTCAGCGACAACGCATGGCGT	CATCAAACACCCTGGACACAACGTTGAGTGAAGCACCCCTTTATGTTGTCATACAGACCTGTTTTGACGCCTGCCCCTTAACCGGGCAGGCGTTTTTTTATG
GlmY(ncRNA0015)	SdsR(ncRNA0070)	-	2705534	2705547	2705510	2705514	-	1925619	1925669	1925685	1925695	53	61.7945	8.34e-74	sRNA	sRNA	TCTTATGTCAGCCCCTTAGGGACGCGCTACATAAACTT	CAACTTTTAGCGCACGGCTCTCTCCCAAGAGCCATTTCCCTGGACCGAATACAGGAATCGTATTCGGTCTCTTTTTA
GlmZ(ncRNA0016)	STnc2000(ncRNA0278)	+	4163334	4163346	4163399	4163401	-	1204288	1204294	1204319	1204344	25	13.8464	3.21e-20	sRNA	sRNA	ACCCCTTTATGTTGTCATACAGACCTGTTTTGACGCCTGCCCCTTAACCGGGCAGGCGTTTTTTTATG	AATGAATAAAAAATGATATGCAGTGATGTATGTTTGCCGGGTCGCCCCGGCTTTTTT
glnH(SL1344_0805)	MgrR(ncRNA0043)	-	896313	896314	896274	896279	+	1550836	1550845	--	--	20	52.4898	3.79e-27	5UTR	sRNA	ATGTTCTCGCAGGGGATCGCCCCGTGGATAGAAAAGGAAAT	ACCGCTGGTGAACCGGCGGTTTTTTTTTGC
glnH(SL1344_0805).glnP(SL1344_0804).IGR	STnc800(ncRNA0200)	-	895415	895511	895384	895390	-	4236850	4236879	4236894	4236901	18	1240.09	2.56e-49	IGR	sRNA	TTGGCTTGTGGCCCGGTAGTGAGGACGCTCACCGGGCCTACAGCTCTTTCCGTGACGGATAAGACACTTTCCGCCATTTCCGCGCCGGATAGAGCATTTGACTATTTACACCACGGTAACAGGAACGA	GTTTTTGAGTTGCCGTGGAAACTTTCAGCCCATCCCAGGATGGGCTTTTTTC
glpE(SL1344_3492)	RprA(ncRNA0058)	-	3709889	3709910	3709862	3709867	-	1401683	1401687	1401731	1401741	13	1146.1	2.8e-35	5UTR	sRNA	TACACTGGGCGATAAAATGCCTTAATTGGCTTCACCGGCAATAATGAAA	TGAAACAACGAATTGCTGTGTGTAGTCTTTGCCCGTCTCCTACGATGGGCTTTTTTTTT
glpF(SL1344_4036)	OxyS(ncRNA0050)	-	4317850	4317884	4317825	4317828	-	4364304	4364312	4364350	4364368	22	1091.86	1.46e-58	CDS	sRNA	TATTTCTCAAGTTGCCGGCGCCTTTTGCGCAGCGGCGTTAGTTTACGGGCTTTATTACAA	TCTCTCGAACCCGAAATAACTAAAGCCAACGTGAACTTTTGCGGACCTCTGGTCCGCTTTTTTTT
glpF(SL1344_4036)	Spf(ncRNA0075)	-	4318115	4318232	4318085	4318154	+	4230566	4230615	4230501	4230554	1192	14.4115	0	CDS	sRNA	AGTGTGCCTACAGGGCATCGTGGATGTCCATGACCTCCTCGCATACCAATAATCATTACATACTCTTCAGGATCCGATTATGAGTCAAACATCAACCTTAAAAGGCCAGTGCATTGCTGAATTCCTCGGTACCGGGTTGTTGATTTTT	ACGTAGGGTACAGAGGTAAGATGTTCTATCTTTCAGACCTTTTACTTCACGTAATCGGATTTGGCTGAATATTTTAGCCGCCCCAGTCAGTTTATGACTGGGGCGTTTTTTATTG
glpF(SL1344_4036)	STnc890(ncRNA0207)	-	4318174	4318231	4318137	4318149	+	14749	14787	14706	14721	40	129.993	1.91e-39	CDS	sRNA	GTGTGCCTACAGGGCATCGTGGATGTCCATGACCTCCTCGCATACCAATAATCATTACATACTCTTCAGGATCCGATTATGAGTCAAACATCAAC	AAAATTCTTTGACGATTTGACTCGCTAATCTTTTCCCGTTGTATTTTTCTTCAGCCCGGGTGTATATCCGGGCTTTTTTCTG
glpG(SL1344_3491)	ArcZ(ncRNA0002)	-	3709402	3709442	3709373	3709375	+	3511913	3511919	3511860	3511861	46	105.818	3.89e-47	CDS	sRNA	GATTACTTCCTTTGCGAATCCTCGCGTGGCGCAGGCATTTGTTGATTACATGGCCACCCAGGGCGTCATT	ATTTCCCTGGTGTTGGCGCAGTATTCGCGCACCCCGGTCAAACCGGGGTCATTTTTTTTC
glpK(SL1344_4035)	ArcZ(ncRNA0002)	-	4317272	4317291	4317241	4317246	+	3511915	3511917	3511860	3511863	12	88.9979	1.49e-19	CDS	sRNA	AATTATGACTGAAAAAAAATATATCGTTGCGCTCGACCAGGGTACCACCAG	ATTTCCCTGGTGTTGGCGCAGTATTCGCGCACCCCGGTCAAACCGGGGTCATTTTTTT
gltS(SL1344_3712)	STnc2110(ncRNA0286)	-	3962376	3962386	3962333	3962337	-	4030646	4030653	4030691	4030695	16	514.618	1.48e-37	5UTR	sRNA	CAGGAAATGATTTGTGCGCACATGTCACAGCGCACTACAGGAGCTTTAAATGTT	AGCTAATGAGCTCCTTGCCTTGCCCCGCCAGAGATGGCGGGGCTTTTTTT
gpB(SL1344_2645).AS	STnc870(ncRNA0205)	-	2825915	2825976	2825846	2825883	+	4292597	4292599	4292540	4292561	10	167.561	3.63e-19	Antisense	sRNA	CAAATTGGCGGCAGAGATTGGTGCGATGGCGACAGATATAAAAAAAACCTGCCGAAGCAGGTTTAAAGCCAGAGTTGCTGTTGCTGGTTTCTGACAGGGTGGGGGGGCGCTGGATCAACAGCCCCCGGTTT	GTTTTCCTTGCCATAGACACCATCCCTGTCTTCCCCCACATGATGTGGGGGTTTTTTTTA
gph(SL1344_3449)	MgrR(ncRNA0043)	-	3659472	3659480	3659443	3659446	+	1550822	1550843	1550764	1550765	12	49.4451	1.37e-16	CDS	sRNA	TTGACGGCACGCTGGTGGATAGCGCGCCGGGTCTTGCC	AATTTGCCCGGTAGCGTATAAGCAAAACACAAATCTATCCATGCAAGCATTTACCGCTGGTGAACCGGCGGTTTTTTTTT
groEL(SL1344_4267)	STnc870(ncRNA0205)	+	4595663	4595676	4595696	4595705	+	4292567	4292600	4292540	4292544	27	709.41	1.71e-63	CDS	sRNA	GAACATACGAATTTAAGGGAAAGAGAAAATGGCAGCTAAAGAC	GTTTTCCTTGCCATAGACACCATCCCTGTCTTCCCCCACATGATGTGGGGGTTTTTTTTAT
gshA(SL1344_2803)	STnc870(ncRNA0205)	-	2991218	2991303	2991166	2991199	+	4292565	4292600	4292538	4292542	29	335.637	1.55e-60	5UTR	sRNA	TATTATTAAGCTGGATGCCGGTCATCGGTGATTTGTTGTGCCTGTTAGCGGGATGGATGCGCATCCCGTGGGGGCGGACGATCTTTTTTTTGTGTCTTGGTAAGGCGCTGCGCTATGTTGCGCTCGCAGCGGCGACGG	CTGTTTTCCTTGCCATAGACACCATCCCTGTCTTCCCCCACATGATGTGGGGGTTTTTTTTAT
guaA(SL1344_2471)	ArcZ(ncRNA0002)	-	2622124	2622168	2622102	2622102	+	3511913	3511919	3511861	3511861	11	23.5676	4.53e-12	5UTR	sRNA	GATTTTCTTCGCCCGACCTTCGTGTCGGGCGATTTATTTAATCTGTTTCACTTGCCTCGGAATAAGC	TTTCCCTGGTGTTGGCGCAGTATTCGCGCACCCCGGTCAAACCGGGGTCATTTTTTTTC
hexR(SL1344_1821)	ArcZ(ncRNA0002)	+	1938937	1938962	1938983	1938987	+	3511889	3511919	3511860	3511861	249	10025.7	0	5UTR	sRNA	ACACCTTTTTTAGCCATTTTGCCCCCTTCGGCAGTCGCCAGGAGTAATATC	ATTTCCCTGGTGTTGGCGCAGTATTCGCGCACCCCGGTCAAACCGGGGTCATTTTTTTTC
hfQ(SL1344_4295)	STnc2110(ncRNA0286)	+	4625146	4625151	--	--	-	4030646	4030669	4030686	4030694	10	239.155	6.74e-21	CDS	sRNA	GAAAAGAGAATGGCTAAGGGGCAATC	GCTAATGAGCTCCTTGCCTTGCCCCGCCAGAGATGGCGGGGCTTTTTTT
hfQ(SL1344_4295)	STnc870(ncRNA0205)	+	4625223	4625248	4625260	4625262	+	4292568	4292600	4292540	4292542	35	166.001	3.08e-63	CDS	sRNA	TATTTATTTGGTGAATGGTATTAAGCTGCAAGGTCAAATC	GTTTTCCTTGCCATAGACACCATCCCTGTCTTCCCCCACATGATGTGGGGGTTTTTTTTAT
hfQ(SL1344_4295)	STnc2000(ncRNA0278)	+	4625309	4625364	4625403	4625403	-	1204288	1204294	1204330	1204330	10	358.212	9.08e-23	CDS	sRNA	AGATGGTTTATAAGCACGCGATTTCTACTGTTGTCCCGTCTCGCCCGGTTTCCCATCACAGCAACAATGCCGGTGGCGGCGCCAGCAATAACTAC	GATATGCAGTGATGTATGTTTGCCGGGTCGCCCCGGCTTTTTT
hha(SL1344_0466)	ArcZ(ncRNA0002)	-	527907	527996	527876	527904	+	3511879	3511920	3511860	3511869	907	1256.75	0	5UTR	sRNA	CGACACCTTTATGTTGTTCAGCAGCTATGGTATTAATACGCAGGATTTGCAAAAATGGCGTAAATCGGGCAACCGCCTGTTCCGTTGTTTCGTCAACGCCACCAGGGCCAATCCTGTTAGT	ATTTCCCTGGTGTTGGCGCAGTATTCGCGCACCCCGGTCAAACCGGGGTCATTTTTTTTCC
hilC(SL1344_2847)	InvR(ncRNA0023)	-	3035433	3035506	3035459	3035465	+	3067546	3067586	3067512	3067520	14	138.944	4.41e-25	CDS	sRNA	AACAAATTTCCATTAATAAATGGATTAGCTGACGTAAGAGACTATTAT	TTGGCCATTTGTCTCTTACGTTGCATTTATCAATCTGCTTTTTGATACAGCAGCACCTCGCTGCTGCTTTTTTTA
himA(SL1344_1273)	STnc870(ncRNA0205)	+	1375892	1375906	1375931	1375933	+	4292591	4292600	4292542	4292542	12	291.566	2.77e-25	5UTR	sRNA	ATTCCAGGCATCATTGAGGGATTGAACCTATGGCGCTTACAA	TTTCCTTGCCATAGACACCATCCCTGTCTTCCCCCACATGATGTGGGGGTTTTTTTTAT
himA(SL1344_1273)	Spf(ncRNA0075)	+	1376010	1376072	1376093	1376094	+	4230570	4230612	4230539	4230546	31	4.29823	2.09e-10	CDS	sRNA	TTTCGAAGAGATCCGTCGTGCTCTGGAAAACGGTGAGCAGGTGAAACTCTCTGGTTTTGGTAACTTCGATCTGCGTGATAAAAAT	CTTTTACTTCACGTAATCGGATTTGGCTGAATATTTTAGCCGCCCCAGTCAGTTTATGACTGGGGCGTTTTTTA
hns(SL1344_1682)	DsrA(ncRNA0011)	+	1804098	1804135	1804151	1804160	-	2026215	2026256	2026275	2026299	52	300.217	5.44e-106	CDS	sRNA	CAACAAACCACCCCAATATAAGTTTGAGATTACTACAATGAGCGAAGCACTTAAAATTCTGAA	CATCAGATTTCCTGGTGTAACGAATTTTCAAGTGCTTCTTGCATAAGCAAGTTTGATCCCGACCCGTAGGGCCGGGATTTTTTTC
hrpA(SL1344_1571)	ArcZ(ncRNA0002)	-	1688199	1688210	1688168	1688173	+	3511916	3511917	--	--	15	532.838	6.45e-34	CDS	sRNA	GGCCATGGATCAGATTACGGCCTAAAAAGCCAGGCGACGACGT	GTCAAACCGGGGTCATTTTTTT
hsdS(SL1344_4455)	STnc870(ncRNA0205)	-	4798517	4798541	4798483	4798495	+	4292578	4292600	4292540	4292541	28	2474.62	3.58e-75	CDS	sRNA	ATCAATTCAGAAATAAAATCAGGAGCTCAAGGGAAGTTGGCTTTGGCAAGGATAAAATC	GTTTTCCTTGCCATAGACACCATCCCTGTCTTCCCCCACATGATGTGGGGGTTTTTTTTAT
hupB(SL1344_0445)	STnc890(ncRNA0207)	+	507536	507572	507599	507605	+	14748	14785	14720	14725	18	296.882	2.58e-38	5UTR	sRNA	GGTCGTACTTCGAAGGATTCAGGTGCGATATAAATTATAAAGAGGAAGAGAAGAGTGAATAAATCTCAAC	ATTTGACTCGCTAATCTTTTCCCGTTGTATTTTTCTTCAGCCCGGGTGTATATCCGGGCTTTTTTC
ilvB(SL1344_3762)	ArcZ(ncRNA0002)	-	4018853	4018855	--	--	+	3511915	3511918	3511858	3511861	13	89.5288	4.28e-21	CDS	sRNA	ATTTTCTGGAGCGCCAGGGGATT	CGATTTCCCTGGTGTTGGCGCAGTATTCGCGCACCCCGGTCAAACCGGGGTCATTTTTTTT
ilvC(SL1344_3869)	GcvB(ncRNA0014)	+	4138853	4138885	4138903	4138924	+	3156924	3156985	3156845	3156931	12	20.1919	5.23e-12	5UTR	sRNA	ATTCGCACAGATAGCAATCTGTAAACCGAACAATAAGCGCGACACACAACATCACGGAGTACACCATCATGG	TGATGTTGTGTTGTTGTGTTTGCAATTGGTCTGCGATTCAGACCACGGTAGCGAGACTACCCTTTTTCACTTCCTGTACATTTACCCTGTCTGTCCATAGTGATTAATGTAGCACCGCCATATTGCGGTGCTTTTTTTTGT
imp(SL1344_0094)	ArcZ(ncRNA0002)	-	107040	107047	107010	107011	+	3511916	3511917	3511861	3511861	11	37.4939	3.63e-14	CDS	sRNA	CAATTCCAGGTCTTTAACGATCAAAACACCAGCAGCTA	TTTCCCTGGTGTTGGCGCAGTATTCGCGCACCCCGGTCAAACCGGGGTCATTTTTTT
infC(SL1344_1268)	STnc440(ncRNA0162)	+	1370897	1370938	--	--	+	4580557	4580566	4580516	4580519	11	143.277	1.41e-20	5UTR	sRNA	ACCTGGGCAGTCTGGACGTAAATGACGTGATTGAGAAGCTGCAACAAGAGATTCGCAGCCGC	GTAATTGTCCTCCTCATATTTGCGGCAGCGTAGTCTGCCGCTTTTTTTTAT
intA(SL1344_3811)	SdsR(ncRNA0070)	+	4072513	4072558	4072547	4072582	-	1925618	1925660	1925687	1925701	428	464.725	0	3UTR	sRNA	TTATTGAGTACTTTTAGGGTTGCGCTAGAAAGTTTTCTACCGATCCTAGAAGTCTCTAGGATCGGTAGAA	TAATGCCAACTTTTAGCGCACGGCTCTCTCCCAAGAGCCATTTCCCTGGACCGAATACAGGAATCGTATTCGGTCTCTTTTTAT
katE(SL1344_1253)	SdsR(ncRNA0070)	-	1355567	1355664	1355515	1355589	-	1925619	1925667	1925689	1925695	281	155720	0	CDS	sRNA	ATTTTATACCGAAGAGGGAATTTTCGATCTCGTCGGTAATAACACGCCGATCTTTTTTATCCAGGATGCGCATAAGTTTCCGGATTTTGTGCACGCCGTTAAGCCCGAACCACATTGGGCTATTCCGCAAGGGCAGAGTGCGCACGACAC	CAACTTTTAGCGCACGGCTCTCTCCCAAGAGCCATTTCCCTGGACCGAATACAGGAATCGTATTCGGTCTCTTTTTA
lepB(SL1344_2544).AS	ArcZ(ncRNA0002)	+	2723429	2723464	2723480	2723489	+	3511913	3511918	3511860	3511863	16	92.2988	8.03e-26	Antisense	sRNA	AATTTATCCAGGAAATAATTCACGCTGCCGCTAAAAAGACGGCAGCGTGAACGATCATTTC	ATTTCCCTGGTGTTGGCGCAGTATTCGCGCACCCCGGTCAAACCGGGGTCATTTTTTTT
livJ(SL1344_3532)	GcvB(ncRNA0014)	-	3756927	3757004	3756942	3756953	+	3156976	3156984	3156831	3156916	11	43.1881	2.84e-14	5UTR	sRNA	CTAGCCAATAATCGAAATAAAGTGCTGAACAATAACACCACAACACACGTAACAACCAGAATA	TTGGCTTACGGTTGTGATGTTGTGTTGTTGTGTTTGCAATTGGTCTGCGATTCAGACCACGGTAGCGAGACTACCCTTTTTCACTTCCTGTACATTTACCCTGTCTGTCCATAGTGATTAATGTAGCACCGCCATATTGCGGTGCTTTTTTTTG
lppA(SL1344_1311)	RyfD(ncRNA0067)	-	1416448	1416505	1416468	1416472	-	2805089	2805166	2805129	2805224	18	8.11057	3.36e-11	5UTR	sRNA	CGCTACATGGAGATTAACTCAATCTAGAGGGTATTAAT	GAATCAAGACGATCCGGTACGGGTAACTTTCTTTTCACATAATTCAGGTCATTCACCTTGAATAATTGAGGGATGACCTCATTTAATCTCCAGTAGCAATTTTGACCTGTTATGGGAGGAGTTATGCGTCTGGATC
lppA(SL1344_1311)	MgrR(ncRNA0043)	-	1416456	1416511	1416421	1416469	+	1550814	1550845	1550744	1550798	88	3.64938	1.34e-23	CDS	sRNA	TTGTAACGCTACATGGAGATTAACTCAATCTAGAGGGTATTAATAATGAATCGTACTAAACTGGTACTGGGCGCGGTAATCCTGGGTTCTA	CGATCCGTTATCCTCGCAAGAATTTGCCCGGTAGCGTATAAGCAAAACACAAATCTATCCATGCAAGCATTTACCGCTGGTGAACCGGCGGTTTTTTTTTGC
lppA(SL1344_1311)	DapZ(ncRNA0010)	-	1416495	1416505	1416465	1416473	+	74921	74924	74846	74846	13	32.5597	7.65e-16	5UTR	sRNA	CGCTACATGGAGATTAACTCAATCTAGAGGGTATTAATAAT	AAATACCTTCGTGATGTGGTTGTGGTAATCAAGATTAATTGATTACAAAGGGCAATATATTATTGCCCTTTTGTTTTTG
lpxD(SL1344_0227).fabZ(SL1344_0228).IGR	STnc870(ncRNA0205)	+	266492	266509	266530	266530	+	4292591	4292599	4292542	4292562	19	10.2941	1.78e-13	IGR	sRNA	TATTATTGCCTTTTTGTATATTTGGACAGGAAGAGTATT	TTTCCTTGCCATAGACACCATCCCTGTCTTCCCCCACATGATGTGGGGGTTTTTTTTA
lrhA(SL1344_2299)	ArcZ(ncRNA0002)	-	2438813	2438898	2438782	2438787	+	3511915	3511918	3511859	3511862	19	89.0573	4.14e-30	5UTR	sRNA	ATTTACCTGGGTAACCAGGCGGTACTGCGAAGGATGCACATTACAAATGGAATTGCTTGTTTCTGAATGCACAGCATTAACCAGGTCAGCCCGATATGACCCGCCAGTAAGTGAAAA	GATTTCCCTGGTGTTGGCGCAGTATTCGCGCACCCCGGTCAAACCGGGGTCATTTTTTTT
lrhA(SL1344_2299)	RprA(ncRNA0058)	-	2438839	2438871	2438816	2438819	-	1401682	1401687	1401730	1401738	48	2586.38	5.85e-141	5UTR	sRNA	CGAAGGATGCACATTACAAATGGAATTGCTTGTTTCTGAATGCACAGCATTAACCA	AACAACGAATTGCTGTGTGTAGTCTTTGCCCGTCTCCTACGATGGGCTTTTTTTTTA
lrhA(SL1344_2299)	STnc1920(ncRNA0276)	-	2438846	2438912	2438823	2438824	+	2756614	2756647	2756585	2756589	25	6479.04	3.37e-85	5UTR	sRNA	AATTACATTCTAACATTTACCTGGGTAACCAGGCGGTACTGCGAAGGATGCACATTACAAATGGAATTGCTTGTTTCTGAATGCACAGCA	GTTTATGCATTTCTGAAACTCCCCCGCAGGTAAGCTCCTTTTCCCTCCTGCGGGAATTTTTTA
lrhA(SL1344_2299)	uhpT(SL1344_3753)	-	2438846	2438871	2438816	2438822	-	4007442	4007448	4007488	4007490	21	34276	8.35e-87	5UTR	3UTR	CGAAGGATGCACATTACAAATGGAATTGCTTGTTTCTGAATGCACAGCATTAACCA	ATGTGTGCATTTGGTAACGTTTTGCCCGGCTTAACGCCGGGCTTTTTAT
lysP(SL1344_2177)	MgrR(ncRNA0043)	-	2298096	2298101	2298061	2298061	+	1550835	1550844	1550787	1550796	24	80.169	2.63e-36	5UTR	sRNA	CTCATTTTTTGGATGGATAGCATTTTCACATGGGTTCCAAA	AAAACACAAATCTATCCATGCAAGCATTTACCGCTGGTGAACCGGCGGTTTTTTTTTG
lysS(SL1344_3016)	MgrR(ncRNA0043)	-	3219823	3219909	3219796	3219806	+	1550825	1550846	1550794	1550806	95	558.842	1.15e-202	3UTR	sRNA	CGCCATCCGGCATCTCTTCGTTCAGGCGTAGCGCCATCAGGCAATCTTTAACGCTGGCAGTAATTGAGCAGTCGTTCACGCGCTTGTTCGTCTGACGCTTGCATGACCATCCAC	AAATCTATCCATGCAAGCATTTACCGCTGGTGAACCGGCGGTTTTTTTTTGCC
maa(SL1344_0465)	ArcZ(ncRNA0002)	-	527115	527210	527077	527127	+	3511913	3511919	3511859	3511862	53	255.631	9.99e-103	CDS	sRNA	GTCACTCCTTTTACGCTAACTTCGACTGCGTCATGCTTGATGTTTGCCCAATTCATATTGGCGATAATTGTATGCTCGCGCCAGGGGTACATATCTATACCGCCACGCATCCGCTGGACGCCGTCGAACGCAAC	GATTTCCCTGGTGTTGGCGCAGTATTCGCGCACCCCGGTCAAACCGGGGTCATTTTTTTTC
maeB(SL1344_2435)	Spf(ncRNA0075)	-	2580002	2580011	2579882	2579981	+	4230559	4230614	4230500	4230546	124	55.2033	2.45e-110	CDS	sRNA	GCGTCACTTTTTGAACGATACGTGAAAGGAACAACAAGATGGATGAGCAGTTAAAACAAAGCGCCCTTGATTTCCACGAATTTCCGGTACCCGGTAAAATTCAGGTTTCTCCGACTAAGCCCCTTGCCAC	CACGTAGGGTACAGAGGTAAGATGTTCTATCTTTCAGACCTTTTACTTCACGTAATCGGATTTGGCTGAATATTTTAGCCGCCCCAGTCAGTTTATGACTGGGGCGTTTTTTATT
maeB(SL1344_2435)	Spf(ncRNA0075)	-	2580017	2580101	2579977	2579986	+	4230570	4230612	4230539	4230544	18	14.1945	1.61e-13	5UTR	sRNA	ATAACAAACTCTTGCGCTGCGTCGTGATAGTTTGCAGACCTTCAAAGTTTGTGTTGCGCAGTACGGTGATAATGTGCGGCGCACCAGGCCGCGTCACTTTTTGAACGATACGTGAAAGGAACAAC	CTTTTACTTCACGTAATCGGATTTGGCTGAATATTTTAGCCGCCCCAGTCAGTTTATGACTGGGGCGTTTTTTA
menA(SL1344_4039)	STnc2000(ncRNA0278)	-	4320567	4320600	4320532	4320553	-	1204288	1204314	1204328	1204330	21	273.065	9.71e-44	5UTR	sRNA	GTTTTATCTTATAATCGCGTCCAATGCATTTTCATCACTGTTGATGGGGCTGAAAAGCCCCATTTTTAT	GATATGCAGTGATGTATGTTTGCCGGGTCGCCCCGGCTTTTTT
MgrR(ncRNA0043)	STnc480(ncRNA0167)	+	1550744	1550787	1550836	1550844	-	587338	587345	587384	587395	16	7.32049	1.84e-09	sRNA	sRNA	CGATCCGTTATCCTCGCAAGAATTTGCCCGGTAGCGTATAAGCAAAACACAAATCTATCCATGCAAGCATTTACCGCTGGTGAACCGGCGGTTTTTTTTTG	ATTATTTTTAATTTAGCTATGTTGGATTTTGCCACGGTGAGAACCGTGGCTTTTTTTA
MgrR(ncRNA0043)	fabA(SL1344_1007)	+	1550745	1550774	1550779	1550839	-	1114144	1114186	1114216	1114216	20	4.09265	2.56e-07	sRNA	3UTR	GATCCGTTATCCTCGCAAGAATTTGCCCGGTAGCGTATAAGCAAAACACAAATCTATCCATGCAAGCATTTACCGCTGGTGAACCGGCGGTTTTT	TATTCCGCGCTATCGGTATCATGCTTGCAAAGCCCATAAAGGCGAAACCTCCGCACTGCGGAGGTTTCTTTTT
mobB(SL1344_3941)	RprA(ncRNA0058)	-	4223021	4223044	4222996	4222997	-	1401684	1401687	1401731	1401732	11	817.696	1.39e-28	3UTR	sRNA	AGTTACCGCACACGCAAAAAAGCCCGTCCGTCAGGATGGGCTTCTTCAC	GAATTGCTGTGTGTAGTCTTTGCCCGTCTCCTACGATGGGCTTTTTTTT
motB(SL1344_1857).cheA(SL1344_1856).IGR	MgrR(ncRNA0043)	-	1976764	1976794	--	--	+	1550821	1550844	1550788	1550800	14	246.901	1.32e-27	IGR	sRNA	ACCCACATCGCCAAAAGCGGAACCGAGGTGATAGCGTGAGCATGGATATTA	AAACACAAATCTATCCATGCAAGCATTTACCGCTGGTGAACCGGCGGTTTTTTTTTG
mreC(SL1344_3345)	ArcZ(ncRNA0002)	-	3564640	3564672	3564614	3564619	+	3511916	3511917	3511862	3511862	10	24.9034	2.51e-11	CDS	sRNA	CTGGCTTCTCGCGACCAGCTTGAGCTGGAAAATCGGGCGCTGCGCCAGGAATTACTGCT	TTCCCTGGTGTTGGCGCAGTATTCGCGCACCCCGGTCAAACCGGGGTCATTTTTTT
mug(SL1344_3186).SL1344_3187(SL1344_3187).IGR	STnc870(ncRNA0205)	+	3399802	3399834	3399854	3399854	+	4292587	4292598	4292554	4292561	15	117.573	6.55e-26	IGR	sRNA	ATATAATTAAGCCACTCTAAAGAGTGGCCTTTTTGTTTCTGACAGGGCTCACC	AGACACCATCCCTGTCTTCCCCCACATGATGTGGGGGTTTTTTTT
murC(SL1344_0129)	ArcZ(ncRNA0002)	+	151929	151958	151980	151988	+	3511913	3511920	3511860	3511862	20	71.4252	7.87e-30	CDS	sRNA	ATTATCAGCAGATAGGGCCGCAGGGGCACTTTACGCTGTTGCGCCAGGGAATGCCGGATC	ATTTCCCTGGTGTTGGCGCAGTATTCGCGCACCCCGGTCAAACCGGGGTCATTTTTTTTCC
murD(SL1344_0126)	MgrR(ncRNA0043)	+	147427	147473	147470	147534	+	1550819	1550846	1550794	1550800	46	58.4622	2.46e-62	CDS	sRNA	TCGTCATTATTGGTCTGGGCTTAACCGGACTCTCTTGCGTGGACTTTTTTCTCGCCCGCGGCGTGACGCCGCGGGTGATGGATACTCGCGTGACGCCGCCGGGTCTGG	AAATCTATCCATGCAAGCATTTACCGCTGGTGAACCGGCGGTTTTTTTTTGCC
mutY(SL1344_3085).AS	MgrR(ncRNA0043)	-	3289402	3289495	3289377	3289386	+	1550818	1550845	1550785	1550800	209	1159.03	0	Antisense	sRNA	CCGAGAGCCATACTTTGTAAGGCGTCTTGTTAATTTGCCAGGGCAGCGTTTTCCGCCCGTATTTGTCGTACCAGTCCAGAACCTGGGCTGAAAATTGAGACGCTTGCATGGAAACTCAT	GCAAAACACAAATCTATCCATGCAAGCATTTACCGCTGGTGAACCGGCGGTTTTTTTTTGC
mviN(SL1344_1107)	ArcZ(ncRNA0002)	+	1211064	1211077	1211133	1211178	+	3511913	3511917	3511835	3511860	19	147.405	6.76e-34	CDS	sRNA	GATACGGCAGAAGTTGCGTTATCCGGTCGATGGATCAGCCATGCAGGAGTTTTACGCCAGGGTCTGGAATACAAAAGAAATGAATTTATTGAAATCGCTGGCTGCCGTCAGCTCG	TCATAATAAGCACGGCGCAGCCACGATTTCCCTGGTGTTGGCGCAGTATTCGCGCACCCCGGTCAAACCGGGGTCATTTTTTT
nagA(SL1344_0665)	ArcZ(ncRNA0002)	-	743502	743504	--	--	+	3511914	3511917	3511859	3511861	13	90.4518	3.78e-21	5UTR	sRNA	AATTTTTGATATCGGGGGTCGGA	GATTTCCCTGGTGTTGGCGCAGTATTCGCGCACCCCGGTCAAACCGGGGTCATTTTTTT
napF(SL1344_2231)	ArcZ(ncRNA0002)	-	2357115	2357180	2357085	2357125	+	3511913	3511918	3511859	3511863	29	301.175	1.16e-58	CDS	sRNA	GTAGATTTCAAACGGGGCGAGTGCAGCTTTTGTTATGCCTGTGCGCAGGCCTGTACCGAATCGCTTTTTCTTCCGCGCCACACCAGGGCCTGGGAT	GATTTCCCTGGTGTTGGCGCAGTATTCGCGCACCCCGGTCAAACCGGGGTCATTTTTTTT
narL(SL1344_1695)	ArcZ(ncRNA0002)	+	1822897	1822899	--	--	+	3511913	3511918	3511861	3511862	13	4386.92	1.71e-35	5UTR	sRNA	CTTCACAGAAACCCAGGGAGATA	TTTCCCTGGTGTTGGCGCAGTATTCGCGCACCCCGGTCAAACCGGGGTCATTTTTTTT
ndk(SL1344_2488)	GcvB(ncRNA0014)	-	2658251	2658252	--	--	+	3156971	3156985	3156789	3156845	10	10.3928	1.09e-07	5UTR	sRNA	CCTGACATAACAACAGAACATA	CGGAACGAAAAGTTTTATCGGAATGCGTGTTCTGATGGGCTTTTGGCTTACGGTTGTGATGTTGTGTTGTTGTGTTTGCAATTGGTCTGCGATTCAGACCACGGTAGCGAGACTACCCTTTTTCACTTCCTGTACATTTACCCTGTCTGTCCATAGTGATTAATGTAGCACCGCCATATTGCGGTGCTTTTTTTTGT
nhaB(SL1344_1734)	STnc870(ncRNA0205)	+	1863631	1863658	1863671	1863679	+	4292591	4292599	4292541	4292542	28	412.436	1.32e-60	5UTR	sRNA	GTTTAAACATAAAAACGCTATTTCATTTTTCTAGGTAAGGAAAAATTTC	TTTTCCTTGCCATAGACACCATCCCTGTCTTCCCCCACATGATGTGGGGGTTTTTTTTA
nhaB(SL1344_1734)	STnc2110(ncRNA0286)	+	1863632	1863655	1863676	1863677	-	4030644	4030653	4030686	4030687	42	2341.37	3.77e-119	5UTR	sRNA	TTTAAACATAAAAACGCTATTTCATTTTTCTAGGTAAGGAAAAATT	AGCTCCTTGCCTTGCCCCGCCAGAGATGGCGGGGCTTTTTTTAT
nucD2(SL1344_2686).AS	ArcZ(ncRNA0002)	+	2870226	2870227	--	--	+	3511913	3511918	3511860	3511862	18	3037.29	8.4e-48	Antisense	sRNA	CTTTTAAGCACCAGGCCATTTC	ATTTCCCTGGTGTTGGCGCAGTATTCGCGCACCCCGGTCAAACCGGGGTCATTTTTTTT
nuoA(SL1344_2297)	RybD(ncRNA0062)	-	2437255	2437312	2437223	2437225	+	807418	807432	807393	807398	18	9.72315	1.83e-12	5UTR	sRNA	AGTAATTGTAGGGTTTTTTTTATTCCTCCCCATGAATCGATGTGGCGCCCATCTGCCGTAAAGAGCAGAGAAACTGGCGCTACTTTTGAT	TTTCGACATGGTTGGCCACCTTTACGGTGGCCTTTTTTAT
nuoB(SL1344_2296).nuoC(SL1344_2295).IGR	ArcZ(ncRNA0002)	-	2436037	2436097	2436009	2436016	+	3511913	3511918	3511855	3511862	18	23.775	6.92e-19	IGR	sRNA	ATTTAATTTGCGCCTGTCGGCAGCAGCACTTCACTTCGCTAACCACTATTTTAATAGCGCGAAGCACTGCCGACCACCACGGACCATTT	CCACGATTTCCCTGGTGTTGGCGCAGTATTCGCGCACCCCGGTCAAACCGGGGTCATTTTTTTT
nuoN(SL1344_2285)	ArcZ(ncRNA0002)	-	2423228	2423232	2423174	2423179	+	3511913	3511918	3511861	3511861	13	6.52314	2.1e-07	CDS	sRNA	AACGATAACCAGGAAGAGTTCTACCTGCTGGTGTTAATCGCCAGCCTGGGCGGAATTCT	TTTCCCTGGTGTTGGCGCAGTATTCGCGCACCCCGGTCAAACCGGGGTCATTTTTTTT
nupG(SL1344_3088)	ArcZ(ncRNA0002)	+	3292252	3292285	3292306	3292309	+	3511913	3511918	3511860	3511862	33	454.647	3.44e-71	CDS	sRNA	CTTAAAATTTGACGGCGCATCTATTGGCGCAGTTTATAGTTCACTGGGGATTGCCGCC	ATTTCCCTGGTGTTGGCGCAGTATTCGCGCACCCCGGTCAAACCGGGGTCATTTTTTTT
ompA(SL1344_1010)	MicA(ncRNA0044)	-	1118326	1118410	1118293	1118351	+	2989452	2989506	2989428	2989448	46	33.3257	2.34e-52	CDS	sRNA	GTGAAGGATTTAACCGTGTTATCTCGTTGGAGATATTCATGGCGTATTTTGGATGATAACGAGGCGCAAAAAATGAAAAAGACAGCTATCGCGATTGCAGTGGCACTGGCTGGTTTCG	GAAAGACGCGCATTTGTTATCATCATCCCTGTTTTCAGCGATGAAATTTTGGCCACTCCGTGAGTGGCCTTTTTCTTTT
ompC(SL1344_2237)	STnc2100(ncRNA0285)	-	2364316	2364373	--	--	+	3550946	3550970	3550908	3550913	11	494.361	1.9e-26	5UTR	sRNA	TGCCGACTGGTTAATGAGGGTTAACCAGTAAGCAGTGGCATAAAAAAGCAATAAAGGCATATAACAGAGGGTTAATAA	ATAAGTAAACCCTCGTCGTCTAACCCGACGACTTGCCCCCGCCTGCCGGGGGCTTTTTTATGC
ompC(SL1344_2237)	STnc970(ncRNA0213)	-	2364320	2364383	2364296	2364348	-	889558	889639	889621	889724	200	7140.41	0	5UTR	sRNA	AGAATGGACTTGCCGACTGGTTAATGAGGGTTAACCAGTAAGCAGTGGCATAAAAAAGCAATAAAGGCATATAACAGAGGGTTAATAA	TATAAATAATTTACCTGCCCGCCAGATTTCAGGCTGTAACATCGCTGTTGTTTGAATTCTGACGGGTATTACCCTCGTCTGTTTGCCAACAGACCCACTGCTCCAACCCTCATTAACCCTGTTTGTTACCCTTATTTGCCCGTCCGTCACTGGACGGGCTTTTTTTA
ompC(SL1344_2237)	STnc3530(ncRNA0393)	-	2364320	2364373	2364323	2364327	+	1564455	1564512	1564414	1564431	11	632.59	1.28e-27	5UTR	sRNA	TGCCGACTGGTTAATGAGGGTTAACCAGTAAGCAGTGGCATAAAAAAGCAA	GATACCCTCCTTTTCCCAAAACTGTGTCACTGCTTAACCTTTATTATTGTTAATTTATTCTTTTATTATTTCAGGACGCTTCTGGCGTCCTTTTTTATT
ompC(SL1344_2237)	RybB(ncRNA0061)	-	2364352	2364374	2364326	2364329	-	941811	941865	941896	941902	32	34.9549	2.51e-37	5UTR	sRNA	TTGCCGACTGGTTAATGAGGGTTAACCAGTAAGCAGTGGCATAAAAAAG	CATACCTATTGCCACTGCTTTTCTTTGATGTCCCCATTTTGTGGAGCCCATCAACCCCGCCATTTCGGTTCAAGGTTGGTGGGTTTTTTGTT
ompD(SL1344_1503)	STnc810(ncRNA0201)	+	1611989	1612031	1612056	1612061	-	4467934	4467937	4467989	4468029	26	2631.05	4.7e-79	CDS	sRNA	AGGAAACACGCTAAGAAAATTATAAGGATTATTAAAATGAAACTTAAGTTAGTGGCAGTGGCAGTGACTTCCC	GAAGTACCTGCCCGGCAACGGGCAATGCCACTGCCCTCAAGTTATGTTATCCCCACTTATGGTCGTATTTTGGCGCTCTTCGGAGCGCTTTTTTTA
ompD(SL1344_1503)	RybB(ncRNA0061)	+	1611991	1612056	1612050	1612102	-	941811	941878	941895	941942	72	58.8308	4.29e-97	CDS	sRNA	GAAACACGCTAAGAAAATTATAAGGATTATTAAAATGAAACTTAAGTTAGTGGCAGTGGCAGTGACTTCCCTGTTGGCAGCAGGCGTTGTAAATGCAGCCGAGGTATATAAC	AATTTTGCCAATAGGTCGAACTTTTCGTTAAAGCATCAGTCATACCTATTGCCACTGCTTTTCTTTGATGTCCCCATTTTGTGGAGCCCATCAACCCCGCCATTTCGGTTCAAGGTTGGTGGGTTTTTTGTT
ompD(SL1344_1503)	STnc970(ncRNA0213)	+	1611991	1612062	1612069	1612086	-	889557	889697	--	889718	122	6667.43	1.94e-262	CDS	sRNA	GAAACACGCTAAGAAAATTATAAGGATTATTAAAATGAAACTTAAGTTAGTGGCAGTGGCAGTGACTTCCCTGTTGGCAGCAGGCGTTGTAAATGC	TAATTTACCTGCCCGCCAGATTTCAGGCTGTAACATCGCTGTTGTTTGAATTCTGACGGGTATTACCCTCGTCTGTTTGCCAACAGACCCACTGCTCCAACCCTCATTAACCCTGTTTGTTACCCTTATTTGCCCGTCCGTCACTGGACGGGCTTTTTTTAT
ompD(SL1344_1503)	SL1344_0670(SL1344_0670)	+	1611992	1612057	1612057	1612058	+	750752	750783	750727	750736	20	1676.07	2.36e-57	CDS	3UTR	AAACACGCTAAGAAAATTATAAGGATTATTAAAATGAAACTTAAGTTAGTGGCAGTGGCAGTGACTT	CAATAAAACCCTGCCTTGCCACCCACGGGCGAATGTTTTCCGCCCGTGGTTTTTTCA
ompD(SL1344_1503)	MicA(ncRNA0044)	+	1612125	1612168	1612184	1612197	+	2989497	2989506	2989436	2989436	10	15.2575	2.36e-09	CDS	sRNA	TGTACGGTAAAGTTCACGCTCAGCATTATTTCTCTGATGATAACGGAAGTGATGGTGACAAAACTTACGCGCG	CGCATTTGTTATCATCATCCCTGTTTTCAGCGATGAAATTTTGGCCACTCCGTGAGTGGCCTTTTTCTTTT
ompD(SL1344_1503)	ArcZ(ncRNA0002)	+	1612493	1612531	1612553	1612558	+	3511913	3511918	3511860	3511862	67	32.4133	2.24e-74	CDS	sRNA	AACACTGACTTCTTTGGCCTGGTTGAAGGTCTGAACTTTGCCGCGCAGTACCAGGGCAAAAACGAC	ATTTCCCTGGTGTTGGCGCAGTATTCGCGCACCCCGGTCAAACCGGGGTCATTTTTTTT
ompF(SL1344_0936)	MicF(ncRNA0046)	-	1047234	1047497	1047195	1047442	+	2364713	2364723	2364636	2364671	57	670.187	7.45e-106	CDS	sRNA	GGAATTTATTGACGGCAGTGGCAGGTGTCATATAAAAAAACCAATGAGGGTAATAAATAATGATGAAGCGCAAAATCCTGGCAGCGGTGATCCCTGCCCTGCTGGCTGCTGCAACCGCAAACGCAGCAGAAATTTATAATAAAGATGGTAATAAGCTGGATCTGTACGGTAAAGCCGTGGGTCGTCACGTATGGACAACGACCGGCGATAGTAAAAATGCCGACCAGACTTATGCCCAGATTGGTTTTAAAGGGGAAACGCAGATTAACACCGATCTGACCGGTTTCGGTCAGTGGGAATACC	CATTAACTTTATTTATTACCGTCATTCACTTCTGAATGTCTGTTTACCCCTATTTCAACCGGATGCTTCGCATTCGGTTTTTTTTACC
ompH(SL1344_0226)	STnc870(ncRNA0205)	+	264803	264878	264901	264908	+	4292579	4292601	4292540	4292559	68	447.001	8.59e-147	5UTR	sRNA	GGAATGCATTGGTAGTGTAGCGATGACTTTTGGCGATGCCCCCAGGGATCGCCAGGCCACGCAAAGAGCTGTACCTTCGGGTGCAAATGGGATGGTAAGGAGTTTA	GTTTTCCTTGCCATAGACACCATCCCTGTCTTCCCCCACATGATGTGGGGGTTTTTTTTATC
ompX(SL1344_0808)	CyaR(ncRNA0009)	+	898711	898781	898796	898805	+	2228898	2228936	2228863	2228879	457	628.147	0	5UTR	sRNA	ACACCGTGAATCGCAAAGAGTTTCCCATTAATTTTTGATATATTTAAAACTTAGGACTTACTTGAAGCACATTTGAGGTGGTTATGAAAAAAATT	ATAAATGCTAGCTGTACCAGGAACCACCTCCTTGGCCTGCGTAATCTCCCTTACGCAGGCTTATTTTTTGCGTA
orf242(SL1344_1324).AS	ArcZ(ncRNA0002)	+	1432123	1432181	1432209	1432215	+	3511915	3511917	3511860	3511862	23	277.23	3.68e-46	Antisense	sRNA	AACCTCCAGCGAAGCGACCACGTTGCGCCACTGGGCAAGCTGTTTTTTCTGCCCGGCAGTGAGCTTTCCGGTGGTCACCAGGAACCATTTTCT	ATTTCCCTGGTGTTGGCGCAGTATTCGCGCACCCCGGTCAAACCGGGGTCATTTTTTT
orgAb(SL1344_2849)	ArcZ(ncRNA0002)	-	3036571	3036608	3036546	3036558	+	3511913	3511918	3511858	3511863	81	882.501	1.13e-188	CDS	sRNA	GTGTTGCTTATGGAGAACTGGCCAGGCACTTTTAATCTTAAATATCACCAGGAACAGCGCTTT	CGATTTCCCTGGTGTTGGCGCAGTATTCGCGCACCCCGGTCAAACCGGGGTCATTTTTTTT
pagO(SL1344_1793)	STnc870(ncRNA0205)	+	1917050	1917060	1917083	1917091	+	4292591	4292599	4292541	4292542	27	2916.46	1.96e-73	CDS	sRNA	TAATTTTTTTACGGAGAGGATCTTATGCGCAAGGTGTCGATA	TTTTCCTTGCCATAGACACCATCCCTGTCTTCCCCCACATGATGTGGGGGTTTTTTTTA
pdhR(SL1344_0151).aceE(SL1344_0152).IGR	RybD(ncRNA0062)	+	176194	176237	176258	176265	+	807425	807433	807356	807395	41	186.65	7.42e-77	IGR	sRNA	GGACAGGTTCCAGATAACTCAACGTATTAGATAGATAAGGAATACCCCCATGTCAGAACGTTTCCAAAATGA	AAACTCGCTGTTCCTGCGGGAACAGATAAATGTCCGTTTTCGACATGGTTGGCCACCTTTACGGTGGCCTTTTTTATG
pdxA(SL1344_0092)	ArcZ(ncRNA0002)	-	103626	103669	103601	103638	+	3511915	3511917	3511860	3511861	12	22.3723	8.79e-13	CDS	sRNA	GGGCCTGCCCGTGCTAAAATACCAGGGATTCGGTCGGGGAGTGAATATTACGCTCGGCCTACCTTTTAT	ATTTCCCTGGTGTTGGCGCAGTATTCGCGCACCCCGGTCAAACCGGGGTCATTTTTTT
pez(SL1344_3382)	rpsD(SL1344_3383)	-	3604831	3604877	3604796	3604839	-	3606108	3606170	3606234	3606234	10	162.207	2.2e-19	CDS	CDS	TCTCTTACCGAGATTAAAGACGTGCTGGCTTCCCGTGGACTGTCTCTGGGTATGCGCCTGGAAAACTGGCCACCGGCAAGCA	CGCCGCATTTACGGTGTGCTGGAGCGTCAGTTCCGTAACTACTACAAAGAAGCAGCACGTCTGAAAGGCAACACCGGTGAAAACCTGTTGGCTCTGCTGGAAGGTCGTCTGGACAACGTTGTATACC
pgi(SL1344_4157)	ArcZ(ncRNA0002)	+	4462613	4462621	4462645	4462645	+	3511913	3511917	3511860	3511862	27	157.119	3.46e-48	CDS	sRNA	TTTTATCAATTGATTCACCAGGGTACTAAAATG	ATTTCCCTGGTGTTGGCGCAGTATTCGCGCACCCCGGTCAAACCGGGGTCATTTTTTT
pheA(SL1344_2625)	RydC(ncRNA0064)	+	2808644	2808666	2808685	2808686	+	1686556	1686590	1686525	1686525	15	42.7401	1.57e-19	CDS	sRNA	TATTGATAACAAAAAAGGCAACACTATGACATCGGAAAACCCA	CTTCCGATGTAGACCCGTCCTCCTTCGCCTGCGTCACGGGTCCTGGTTAGACGCAGGCGTTTTCTG
pheS(SL1344_1271)	STnc870(ncRNA0205)	+	1373410	1373418	1373441	1373441	+	4292596	4292599	4292550	4292550	10	44.7856	8.81e-14	CDS	sRNA	CTTTTGGTATGGGGATGGAACGTCTGACCATG	CCATAGACACCATCCCTGTCTTCCCCCACATGATGTGGGGGTTTTTTTTA
phnA(SL1344_4226)	STnc440(ncRNA0162)	-	4551829	4551858	4551744	4551761	+	4580557	4580565	4580483	4580525	18	382.058	2.94e-40	CDS	sRNA	GCCTTTTTCGGCGATCTGCCATTTTTGGGCGCGTTTGCCCCCGCTGACTTTTTGAGGATACCAACATGTCATTACCCCACTGCCCGCAATGTAACTCCGAATATACCTACGAAGA	CAGTAACGGATTACTTTGTGGTGTAGCGTAACGGTAATTGTCCTCCTCATATTTGCGGCAGCGTAGTCTGCCGCTTTTTTTTA
phoP(SL1344_1169)	ArcZ(ncRNA0002)	-	1276239	1276251	1276214	1276217	+	3511915	3511918	3511859	3511861	26	487.516	5.28e-57	5UTR	sRNA	CTAGACTGTTCTTATTGTTAACACAAGGGAGAAGAGAT	GATTTCCCTGGTGTTGGCGCAGTATTCGCGCACCCCGGTCAAACCGGGGTCATTTTTTTT
pitA(SL1344_3554)	MgrR(ncRNA0043)	+	3779722	3779787	3779862	3779933	+	1550820	1550845	1550745	1550811	314	107.919	0	5UTR	sRNA	AGTACATCAAAAAAAGTCTATATTTCACTTTGCCCGCGCCGCCAAAGTCACTGATAATGCGCCGCGTTCATGTCCTCAAAATGGCGTAACGTCCTATGCTACATTTGTTTGCTGGCCTGGATTTACATACCGGGCTTTTATTATTGCTTGCTCTGGCTTTTGTGCTGTTCTACGAAGCGATTAACGGCTTCCATGACACAGCCAATGCAGTC	GATCCGTTATCCTCGCAAGAATTTGCCCGGTAGCGTATAAGCAAAACACAAATCTATCCATGCAAGCATTTACCGCTGGTGAACCGGCGGTTTTTTTTTGC
pitA(SL1344_3554)	MgrR(ncRNA0043)	+	3779789	3779858	3779839	3780067	+	1550820	1550847	1550745	1550807	1496	268.295	0	CDS	sRNA	TCATGTCCTCAAAATGGCGTAACGTCCTATGCTACATTTGTTTGCTGGCCTGGATTTACATACCGGGCTTTTATTATTGCTTGCTCTGGCTTTTGTGCTGTTCTACGAAGCGATTAACGGCTTCCATGACACAGCCAATGCAGTCGCAACCGTGATTTACACCCGTGCGATGCGTTCGCAGCTGGCGGTTGTCATGGCGGCGGTGTTTAACTTTTTTGGCGTTTTGCTGGGGGGTCTCAGCGTGGCGTATGCCATTGTGCATATGCTACCGACGGATCT	GATCCGTTATCCTCGCAAGAATTTGCCCGGTAGCGTATAAGCAAAACACAAATCTATCCATGCAAGCATTTACCGCTGGTGAACCGGCGGTTTTTTTTTGCCT
plsX(SL1344_1129)	ArcZ(ncRNA0002)	+	1232790	1232839	1232847	1232861	+	3511913	3511918	3511859	3511860	40	217.788	1.42e-75	CDS	sRNA	CCGTTTTGGCGGAAGAGGTCGTCGGGATCAAAAATCCCCGCGTGGCGCTACTCAATATCGGGGAAGAAGAAA	GATTTCCCTGGTGTTGGCGCAGTATTCGCGCACCCCGGTCAAACCGGGGTCATTTTTTTT
pnp(SL1344_3255)	Spf(ncRNA0075)	-	3472089	3472101	3472030	3472070	+	4230569	4230613	4230503	4230554	88	2.51494	1.96e-13	CDS	sRNA	GGAAAGGATATTATTTTGCTTAATCCGATCGTTCGTAAATTCCAGTACGGTCAGCATACCGTTACGCTGGAA	GTAGGGTACAGAGGTAAGATGTTCTATCTTTCAGACCTTTTACTTCACGTAATCGGATTTGGCTGAATATTTTAGCCGCCCCAGTCAGTTTATGACTGGGGCGTTTTTTAT
pnp(SL1344_3255).SL1344_3254(SL1344_3254).IGR	ArcZ(ncRNA0002)	-	3469897	3469971	3469874	3469882	+	3511913	3511919	3511859	3511863	232	490.482	4.47176197502989e-317	IGR	sRNA	GCGAGCGAACAGGCCGAGTAAGGTAGCCTTTTGCCCTCCGCAGTGCGGAGGGCTTTAGACCTGGCTGGACGCCTTGTTGAGCCACCGGGGAACAGGAC	GATTTCCCTGGTGTTGGCGCAGTATTCGCGCACCCCGGTCAAACCGGGGTCATTTTTTTTC
potD(SL1344_1159)	Spf(ncRNA0075)	-	1263781	1263811	1263748	1263788	+	4230567	4230612	4230531	4230543	42	5.24686	3.82e-16	3UTR	sRNA	AAAGCGCCTGTCGGGCCTACAGATGAACGTAACGTGAAATGTAGGCCGGATAAGGCGTTACCGG	TTTCAGACCTTTTACTTCACGTAATCGGATTTGGCTGAATATTTTAGCCGCCCCAGTCAGTTTATGACTGGGGCGTTTTTTA
ppiC(SL1344_3870)	InvR(ncRNA0023)	-	4140793	4140798	--	--	+	3067542	3067586	3067516	3067520	14	338.098	9.9e-30	5UTR	sRNA	GCCAATCTTTGCGACGTGAGAACACA	CCATTTGTCTCTTACGTTGCATTTATCAATCTGCTTTTTGATACAGCAGCACCTCGCTGCTGCTTTTTTTA
pps(SL1344_1283)	ArcZ(ncRNA0002)	+	1385110	1385142	1385161	1385168	+	3511913	3511918	3511859	3511860	24	540.004	1.63e-53	CDS	sRNA	ATTTGCTTCTCTGTTTAACGATCGCGCCATCTCTTATCGCGTTCACCAGGGATATGATC	GATTTCCCTGGTGTTGGCGCAGTATTCGCGCACCCCGGTCAAACCGGGGTCATTTTTTTT
prc(SL1344_1774)	STnc2110(ncRNA0286)	-	1899714	1899753	1899681	1899682	-	4030647	4030656	4030686	4030686	14	393.415	1.54e-31	CDS	sRNA	CTGACGCGTGAACGGATTCGTCTTGAAGATCGCGCGGTTAAAATGTCGGTGAAAACCGTCGGCAAGGAAAAAG	GCTCCTTGCCTTGCCCCGCCAGAGATGGCGGGGCTTTTTT
prfB(SL1344_3017)	Spf(ncRNA0075)	-	3222466	3222492	3222389	3222453	+	4230556	4230612	4230522	4230530	20	3.82344	1.58e-06	5UTR	sRNA	TCTTTGACTACGATGCTAAGAAAGAGCGTCTGGAAGAAGTAAACGCCGAGCTGGAACAGCCGGATGTCTGGAACGAACCTGAGCGCGCGCAGGCGCTGGGAAAA	TGTTCTATCTTTCAGACCTTTTACTTCACGTAATCGGATTTGGCTGAATATTTTAGCCGCCCCAGTCAGTTTATGACTGGGGCGTTTTTTA
prkB(SL1344_3431)	Spf(ncRNA0075)	+	3635412	3635445	3635467	3635485	+	4230573	4230612	4230539	4230553	16	31.0581	8.39e-16	CDS	sRNA	ACAATACATTATTACTAAAGCTCAATCATGGAGTTGCCATGTCAGCCAAACATCCGGTGATAGCAGTAACAGGG	CTTTTACTTCACGTAATCGGATTTGGCTGAATATTTTAGCCGCCCCAGTCAGTTTATGACTGGGGCGTTTTTTA
prlA(SL1344_3387)	rpsE(SL1344_3390)	-	3607945	3608000	3607923	3607933	-	3609627	3609664	3609687	3609691	17	136.408	1.19e-30	CDS	CDS	TTCCAGTATTATTCTGTTCCCGGCGACCATCGCGTCATGGTTCGGGGGCGGTACTGGTTGGAACTGGCTGACAACAAT	TATTCATGCAGCCAGCTTCCGAAGGTACCGGTATCATCGCCGGTGGTGCAATGCGCGCCGTTCTG
proP(SL1344_1775)	ChiX(ncRNA0003)	-	1901469	1901505	1901448	1901460	+	555564	555574	555516	555536	33	3.86675	2.11e-10	5UTR	sRNA	TGTTCATGCCTGCTGCTTGTTGGCTACGTCCGTTGTAATCAGGAAATTTCATGGAAAA	AATAATAACGATGAAATTCCTCTTTGACGGGCCAATAGCGATATTGGCCATTTTTTTAT
ptsG(SL1344_1140)	SgrS(ncRNA0071)	+	1242391	1242479	1242500	1242509	+	128765	128817	128716	128741	103	500.528	1.62e-161	5UTR	sRNA	ATTTTACTCTGTGTAATAAATAAAAGGGCACTTAGATGTCCTGTCCACGGCGGGGTTCTCCCCCCTCGCCAATGCGTGAGAACGTAGAAAAGCACAAATACTCAGGAGCACTCTCAATT	CCGATTGAAGCCAATTGCAGACATCATGTGTGACTGAGTATTGGTGTAGGCGATAGCCTAAAATCACCCGCCAGCAGATAATATCTGCTGGCTTTTTTTATT
ptsH(SL1344_2394)	STnc810(ncRNA0201)	+	2542132	2542147	2542169	2542189	-	4467933	4467941	4467975	4467984	14	1126.93	3.06e-38	5UTR	sRNA	TTTAATGACGAGCGAAACGTCAGCGGCCATAAGTTGCCAGCAACGGATTGCGTAGAAC	GTTATCCCCACTTATGGTCGTATTTTGGCGCTCTTCGGAGCGCTTTTTTTAT
purA(SL1344_4299)	ArcZ(ncRNA0002)	+	4629756	4629767	4629788	4629789	+	3511915	3511917	3511860	3511862	11	54.1884	7.9e-16	CDS	sRNA	GCTAAATATGTTGTACGCTACCAGGGCGGTCACA	ATTTCCCTGGTGTTGGCGCAGTATTCGCGCACCCCGGTCAAACCGGGGTCATTTTTTT
pykA(SL1344_1822)	ArcZ(ncRNA0002)	+	1940003	1940004	--	--	+	3511914	3511921	3511859	3511861	37	580.914	1.59e-82	5UTR	sRNA	GTTCACGCAACACCAAGTTGTT	GATTTCCCTGGTGTTGGCGCAGTATTCGCGCACCCCGGTCAAACCGGGGTCATTTTTTTTCCG
ratB(SL1344_2475)	ArcZ(ncRNA0002)	-	2636236	2636297	2636215	2636215	+	3511915	3511917	3511860	3511860	11	463.989	9.49e-25	CDS	sRNA	TAAAAGACGCCAGCGGCAATCCGCTGCCGCAAGCGCCGTTCGTGTTAAGCCGCGGCGACGGCTATACCCGCCAGGGGGAGAAA	ATTTCCCTGGTGTTGGCGCAGTATTCGCGCACCCCGGTCAAACCGGGGTCATTTTTTT
rbsD(SL1344_3848)	ArcZ(ncRNA0002)	+	4113128	4113238	4113168	4113270	+	3511880	3511920	3511809	3511870	344	6549.77	0	CDS	sRNA	GTGGTGGATGTCGTGACCCGGGAAATGCAGGTTGAGGCGGCGATTCTTGCAACGGAAATCAAACAACAGAATCCGCAGCTCCACGAAACGTTGCTCACTCACCTTGAGCAACTGCAGCAACACCAGGGAAACACCATAAAAAT	AAAACAGGACTGCGCCTTTGACATCATCATAATAAGCACGGCGCAGCCACGATTTCCCTGGTGTTGGCGCAGTATTCGCGCACCCCGGTCAAACCGGGGTCATTTTTTTTCC
rcsB(SL1344_2239)	STnc2110(ncRNA0286)	+	2367593	2367685	2367709	2367709	-	4030647	4030653	4030686	4030698	17	1968.52	3.6e-48	5UTR	sRNA	GTTATGTGAAACGCTGGAACATCTGATTCGTGAGAAAGATGCTCCAGGTATAGAAAAATATATCAGCGACATTGACGCCTACGTCAAAAGCTTGCTGTAGCAAGGTAGCCCAATACA	AATAGCTAATGAGCTCCTTGCCTTGCCCCGCCAGAGATGGCGGGGCTTTTTT
recJ(SL1344_3018).prfB(SL1344_3017).IGR	STnc2000(ncRNA0278)	-	3222723	3222723	3222599	3222653	-	1204288	1204293	1204320	1204341	14	7349.21	3.43e-48	IGR	sRNA	AGTTTCGCGGCAACCGTAGTTTACAGATTATTATCGATGATATTTGGCCGCTATGATCGGGGCGATTTAACAACACTTTCGCTGTAATTAAGGGGCGAAATCCGCTAATATTTCGCCCTTATAAC	GAATAAAAAATGATATGCAGTGATGTATGTTTGCCGGGTCGCCCCGGCTTTTTT
relA(SL1344_2937)	ArcZ(ncRNA0002)	-	3126519	3126540	3126495	3126496	+	3511915	3511919	3511861	3511861	13	79.0434	1.92e-20	CDS	sRNA	GGTGAATTTGATCCGAAGAAGTGGATCGCAAGCCTGGGAATTTCCA	TTTCCCTGGTGTTGGCGCAGTATTCGCGCACCCCGGTCAAACCGGGGTCATTTTTTTTC
rfaL(SL1344_3679)	ArcZ(ncRNA0002)	+	3930408	3930417	3930439	3930439	+	3511913	3511919	3511861	3511862	16	224.979	2.41e-31	CDS	sRNA	ATCGTTATACTAACGGAACCCAGGGCACCGCG	TTTCCCTGGTGTTGGCGCAGTATTCGCGCACCCCGGTCAAACCGGGGTCATTTTTTTTC
rfbA(SL1344_2072)	ArcZ(ncRNA0002)	-	2173532	2173569	2173511	2173516	+	3511916	3511918	3511859	3511861	24	490.913	8.69e-53	CDS	sRNA	AGTTTGATAGAGGCCAGTAATTTTATTGCAACCATCGAAGAACGCCAGGGGCTAAAAGT	GATTTCCCTGGTGTTGGCGCAGTATTCGCGCACCCCGGTCAAACCGGGGTCATTTTTTTT
rfbJ(SL1344_2066)	STnc870(ncRNA0205)	-	2168122	2168207	2168098	2168098	+	4292585	4292599	4292541	4292556	22	1257.97	9.19e-56	CDS	sRNA	ATTACTAAAAGACACTTTGATGAAATTGGGCATTATTATGCTAATATGCATGACATTTCATTTGTAAACATGCGATTAGAGCATGTATATGGGCCTGGGGATGGTGAAAA	TTTTCCTTGCCATAGACACCATCCCTGTCTTCCCCCACATGATGTGGGGGTTTTTTTTA
rfbK(SL1344_2060)	SdsR(ncRNA0070)	-	2161386	2161392	2161357	2161362	-	1925619	1925669	1925679	1925696	36	958.63	1.45e-89	CDS	sRNA	AAGTAGTTATGGGATGGCTCAGGCGTGTGCTGCTGC	CCAACTTTTAGCGCACGGCTCTCTCCCAAGAGCCATTTCCCTGGACCGAATACAGGAATCGTATTCGGTCTCTTTTTA
rfbV(SL1344_2064).rfbU(SL1344_2063).IGR	glmS(SL1344_3828)	-	2165136	2165183	2165106	2165114	-	4090294	4090303	4090339	4090359	33	5903.18	1.94e-110	IGR	3UTR	GGAATGTTAGTATAATAATATATTTCTTTATGATTGTTTTTGTAGTGTTTTACTGCCGGTATTACATTAACTCTATTA	GTTACCGTAGAGTAAGTACAAATGTAGTACCAGGCAGAAGGCCGTCGACAGACGGCCTTTTTTTGT
rfbV(SL1344_2064).rfbU(SL1344_2063).IGR	MgrR(ncRNA0043)	-	2165139	2165195	2165115	2165121	+	1550830	1550845	1550798	1550812	14	34.6769	4.15e-17	IGR	sRNA	TGTTTTTTTCTGGGAATGTTAGTATAATAATATATTTCTTTATGATTGTTTTTGTAGTGTTTTACTGCCGGTATTACATTA	CTATCCATGCAAGCATTTACCGCTGGTGAACCGGCGGTTTTTTTTTGC
rfbV(SL1344_2064).rfbU(SL1344_2063).IGR	Spf(ncRNA0075)	-	2165223	2165310	2165263	2165263	+	4230571	4230612	4230548	4230571	20	9.17626	4.43e-12	IGR	sRNA	TAAATGTAGATTTAACCTTTCTGGATTCAGCTAGATTTACGTTACTGA	CACGTAATCGGATTTGGCTGAATATTTTAGCCGCCCCAGTCAGTTTATGACTGGGGCGTTTTTTA
rfbX(SL1344_2065)	MgrR(ncRNA0043)	-	2167120	2167611	2167098	2167575	+	1550839	1550845	1550796	1550812	23	151.553	4.29e-20	CDS	sRNA	AATTCCGAGTCATTTAATTGTTGCAGGTTCATCATGGTTATCCAAAATAATAATTGCCGGGGTGCAGTTAGCAAGTATTTCATATCTTATTTCTATACTAGGTGAAGAGAAATATGCAATCTTTAGTTTGTTAACTGGTTTATTAGTATGGTGTAGCGCTGTTGATTTTGGCATAGGTACAGGACTGCAAAATTATATATCAGAATGCAGAGCCAAAAACAAAAGTTATGATGCATATATTAAATCAGCATTACATCTAAGCTTTATAGCTATTATTTTTTTTATTGCTTTATTTTATATTTTTTCTGGGGTAATTTCCGCTAAATATCTTTCTTCTTTTCATGAGGTATTACAGGACAAAACCAGAATGCTCTTTTTTACCTCATGTCTGGTTTTCAG…	ATCTATCCATGCAAGCATTTACCGCTGGTGAACCGGCGGTTTTTTTTTGC
rfbX(SL1344_2065)	ArcZ(ncRNA0002)	-	2167315	2167350	2167295	2167295	+	3511914	3511917	3511860	3511861	10	23.515	4.32e-11	CDS	sRNA	CTTTATAGCTATTATTTTTTTTATTGCTTTATTTTATATTTTTTCTGGGGTAATTT	ATTTCCCTGGTGTTGGCGCAGTATTCGCGCACCCCGGTCAAACCGGGGTCATTTTTTT
rfc(SL1344_1266)	MgrR(ncRNA0043)	-	1367621	1367712	1367599	1367601	+	1550835	1550845	1550792	1550803	25	423.975	1.73e-52	CDS	sRNA	TTTTCTCTTGTCGCTTCTATTTGCGCGTTCTTTACATACAAAAAATCAAAGTTATTTTGTATTTCCATAGTTTTATTTAACTGTATACTTATTTTCTTGCATGGTAACAAAGGA	ACAAATCTATCCATGCAAGCATTTACCGCTGGTGAACCGGCGGTTTTTTTTTGC
RfrB(ncRNA0056)	STnc2180(ncRNA0291)	-	1309795	1309812	1309760	1309778	-	1992862	1992885	1992904	1992916	33	212.057	3.17e-64	sRNA	sRNA	TGAGTTTATAACCCACCTGTTCGGTACGACATTGCTCACATTGCTTCCAGTAT	GAATAATCAAAGCAATAAGCAGTGTCGTGAAACCACCTACGGGTGGTTTTTTTGT
ribH(SL1344_0411)	Spf(ncRNA0075)	+	470493	470504	470527	470528	+	4230550	4230612	4230514	4230525	36	2.75289	3.01e-07	5UTR	sRNA	GGGCCAAATGAACCCTGGAAGAGAGAATATGAACAT	AGGTAAGATGTTCTATCTTTCAGACCTTTTACTTCACGTAATCGGATTTGGCTGAATATTTTAGCCGCCCCAGTCAGTTTATGACTGGGGCGTTTTTTA
ribH(SL1344_0411).nusB(SL1344_0412).IGR	ChiX(ncRNA0003)	+	470961	470997	471012	471019	+	555565	555575	555516	555525	84	37.0515	7.34e-37	IGR	sRNA	GATTAATGTATTGAAAGCCATTAAGGCCTGATTTTTTGTAAGGGGAATTCCGTGAAACC	AATAATAACGATGAAATTCCTCTTTGACGGGCCAATAGCGATATTGGCCATTTTTTTATT
rnb(SL1344_1633)	MgrR(ncRNA0043)	+	1753046	1753084	1753107	1753143	+	1550821	1550843	1550761	1550800	15	4.97241	7.62e-07	CDS	sRNA	GTTTATAAAGTGACGGATGTCATTGATGTCACTATTGCGGAAGTTCGCATGGAAACCCGCAGCATTATTGCCCGACCGGCAGCGTAACCACGCTTAGC	AAGAATTTGCCCGGTAGCGTATAAGCAAAACACAAATCTATCCATGCAAGCATTTACCGCTGGTGAACCGGCGGTTTTTTTTT
rpl19(SL1344_2646)	rpsP-leader(ncRNA0100)	-	2826015	2826102	2825988	2826039	-	2827932	2828104	2828088	2828146	92	82.4872	1.19e-71	3UTR	sRNA	GCGTACTGGTAAAGCGGCTCGTATCAAAGAGCGTCTTAACTGATAACGCATTCACGCTACATCCAAAGCGTGTTGTAAAACAAGGGGTTAGCGAATTGCTGACCCCTTTTTTATT	GGGCTTTTAATATGACGCCGGGCTCCGTTCCTCGATGGGGCCCGGTTGTTTTATTCACACAAGAGGATGTTATGGTAACTATTCGTTTAGCTCGTCACGGCGCTAAAAAGCGTCCGTTCTACCAGGTTGTTGTCACCGACAGCCGTAATGCACGCAACGGTCGCTTCATTGAGCGCGTTGGTTTCTTCAACCCAATCGCTAGCGAAAAAGAAGAA
rpl19(SL1344_2646)	rps16(SL1344_2649)	-	2826113	2826205	2825988	2826107	-	2827996	2828082	2828069	2828145	24	143.074	4.12e-43	3UTR	5UTR	AAGGCGTTGAGCGTGTCTTCCAGACTCACTCTCCGGTAGTTGACAGCATTGCTGTTAAACGTCGTGGTGCTGTTCGTAAAGCTAAACTGTACTACCTGCGTGAGCGTACTGGTAAAGCGGCTCGTATCAAAGAGCGTCTTAACTGATAACGCATTCACGCTACATCCAAAGCGTGTTGTAAAACAAGGGGTTAGCGAATTGCTGACCCCTTTTTTATT	GGCTTTTAATATGACGCCGGGCTCCGTTCCTCGATGGGGCCCGGTTGTTTTATTCACACAAGAGGATGTTATGGTAACTATTCGTTTAGCTCGTCACGGCGCTAAAAAGCGTCCGTTCTACCAGGTTGTTGTCACCGACAGCCGTAATGC
rplC(SL1344_3407)	SL1344_1990(SL1344_1990)	-	3617364	3617393	3617318	3617323	-	2091776	2091780	2091808	2091808	11	14.412	6.65e-10	CDS	3UTR	TAGGTCAGAGCATCAGCGTTGAACTGTTTGCTGACGTTAAAAAAGTTGACGTAACCGGTACCTCTAAAGGTAAAGG	GGTTGACCTGAGAAGGTTTACCGGGTTTTTTGA
rplJ(SL1344_4090)	ArcZ(ncRNA0002)	+	4385897	4385962	4385987	4385988	+	3511913	3511919	3511861	3511861	17	4.65836	3.44e-07	5UTR	sRNA	GTTTCTGCTCACCGTATTAAGACGCTCTTCTCGTTGAGATGAGTGAAGTGAGTTCCGGAACATGAGTTCCGGCAAACATCCAGGAGCAAAGC	TTTCCCTGGTGTTGGCGCAGTATTCGCGCACCCCGGTCAAACCGGGGTCATTTTTTTTC
rplK(SL1344_4088)	ChiX(ncRNA0003)	+	4384343	4384459	4384430	4384443	+	555565	555574	555516	555530	165	15.6752	1.12e-72	5UTR	sRNA	GCCTTTTGTTTTTATGGGCCTTATGCCCATAAAGCGATATTTATCACGGGGAGCTTCTTTGAAGCGATACTACCCAATTCGAGGAATTTAGAATGGCTAAG	AATAATAACGATGAAATTCCTCTTTGACGGGCCAATAGCGATATTGGCCATTTTTTTAT
rplL(SL1344_4091)	ybjU(SL1344_0873)	+	4386882	4386885	4387003	4387010	-	966441	966445	966496	966506	10	45.0538	7.82e-14	3UTR	CDS	TCTCTGGAAGAAGCTGGCGCTGAAGTTGAAGTTAAATAAGCCAACCCTTCCGGTTGCAGCCTGAGAAATCAGGCTGATGGCTGGTGACTTTTTAGTCACCAGCCTTTTTGCGCTGTAAGGCGCCAGTAG	CCCTACTGTTAACGCCCTTCAGCGCTACGCCGCCGACCTTTCCGGTAAAGAAGCGGCGCTTTTTTT
rplN(SL1344_3397)	STnc2110(ncRNA0286)	-	3612913	3612982	3612890	3612892	-	4030645	4030682	4030692	4030720	33	15.2697	1.74e-27	5UTR	sRNA	CGGTGTTATAATGCCGCGCCCTCGATATGGGGTTTTTTTAACGACCTGATTTTCGGGTCTCAGTAGTAGTTGACATTAGCGGAGCACTAAAAT	CATTAACGAACGCTCCGCATTAAATAGCTAATGAGCTCCTTGCCTTGCCCCGCCAGAGATGGCGGGGCTTTTTTTA
rplQ(SL1344_3381)	rpsI(SL1344_3316)	-	3604336	3604339	--	--	-	3533782	3533787	3533835	3533837	10	19.1536	2.63e-10	3UTR	3UTR	AACCCGCTTCGGCGGGTTTTTTTA	GTTCTCCAAACGTTAATGGGGTTCTGCTTCGGCAGACAACTGTTAGCGAAAAAACC
rplQ(SL1344_3381)	rpsM(SL1344_3385).rpsK(SL1344_3384).IGR	-	3604620	3604707	3604595	3604604	-	3606750	3606774	3606800	3606807	14	45.4021	6.46e-19	CDS	IGR	GCAACAGCAGCCATCGCCAGGCTATGTTCCGCAACATGGCAGGTTCACTGGTTCGTCATGAAATCATCAAGACGACCCTGCCTAAAGCGAAAGAGCTGCGTCGCGTAGTTGAG	GTAAGAAAACAAGTCTCTGACGGCGTGGCTCATATCCATGCTTCTTTCAACAACACCA
rplQ(SL1344_3381)	rpsD(SL1344_3383)	-	3604713	3604750	3604675	3604686	-	3606198	3606278	3606309	3606319	11	45.0143	3.85e-15	CDS	CDS	GATAAGGTCATGCGCCATCGTAAGAGTGGTCGTCAACTGAACCGCAACAGCAGCCATCGCCAGGCTATGTTCCGCA	AATTGAACAAGCTCCTGGCCAGCACGGTGCGCGTAAGCCGCGTCTGTCTGACTATGGTGTGCAGTTGCGTGAAAAGCAAAAAGTTCGCCGCATTTACGGTGTGCTGGAGCGTCAGTTCCGTA
rpmA(SL1344_3275)	SL1344_0670(SL1344_0670)	-	3494123	3494132	--	--	+	750782	750783	750727	750737	10	380.593	4.64e-23	CDS	3UTR	GATTCTGAAGCTAAACGTCTGGGCGTAAAA	CAATAAAACCCTGCCTTGCCACCCACGGGCGAATGTTTTCCGCCCGTGGTTTTTTCA
rpoC(SL1344_4093)	rpoC(SL1344_4093)	+	4394211	4394296	4394317	4394331	+	4393037	4393110	--	--	25	3827.26	1.42e-42	CDS	CDS	AGCATCAAGCTCAGCAACGTGAAGTCGGTTGTGAACTCCAGCGGTAAACTGGTTATCACTTCTCGTAACACCGAACTGAAGCTGATCGACGAATTCGGTCGTACCAAAGAGAGCTATAAAG	GAAAACGGCGAATTCGTTGCGCACACCAGCCTGAAAGACACGACCGTTGGTCGCGCCATTCTGTGGATGATCGTACCGAAAGGTCTGCCTTTCT
rpoS(SL1344_2903)	MgrR(ncRNA0043)	-	3089116	3089312	3089066	3089260	+	1550819	1550847	1550760	1550807	363	163.336	0	5UTR	sRNA	CTTATTATCATCAAACATAACGATGATTACCTGAGTGCCTACGCCCATAATGATACGATGCTGGTCCGGGAACAACAGGAAGTTAAGGCGGGGCAAAAAATCGCTACTATGGGTAGCACCGGCACCAGCTCTACACGCTTGCATTTTGAAATTCGTTACAAGGGGAAATCCGTAAACCCGCTGCGTTATTTACCGCAGCGATAAAGCGGCGGAACCAGGCTTTGACTTGCTAGTTCCGTCAAGGGAT	CAAGAATTTGCCCGGTAGCGTATAAGCAAAACACAAATCTATCCATGCAAGCATTTACCGCTGGTGAACCGGCGGTTTTTTTTTGCCT
rpoS(SL1344_2903)	ArcZ(ncRNA0002)	-	3089129	3089181	3089103	3089142	+	3511915	3511917	3511861	3511862	13	9.71616	2.23e-09	5UTR	sRNA	TACACGCTTGCATTTTGAAATTCGTTACAAGGGGAAATCCGTAAACCCGCTGCGTTATTTACCGCAGCGATAAAGCGGC	TTTCCCTGGTGTTGGCGCAGTATTCGCGCACCCCGGTCAAACCGGGGTCATTTTTTT
rpoS(SL1344_2903)	DsrA(ncRNA0011)	-	3089130	3089311	3089070	3089160	-	2026214	2026278	2026277	2026302	336	770.176	0	5UTR	sRNA	TTATTATCATCAAACATAACGATGATTACCTGAGTGCCTACGCCCATAATGATACGATGCTGGTCCGGGAACAACAGGAAGTTAAGGCGGGGCAAAAAATCGCTACTATGGGTAGCACCGGCACCAGCTCTACACGCTTGCATTTTGAAATTCGTTACAAGGGGAAATCCGTAAACCCGCTGCGTTATTTACCGCAGCGATAAAGCGGCGGAACCAGGCTTTGACTTGCTAGTTCCGTCAAG	TCACATCAGATTTCCTGGTGTAACGAATTTTCAAGTGCTTCTTGCATAAGCAAGTTTGATCCCGACCCGTAGGGCCGGGATTTTTTTCG
rps16(SL1344_2649)	ArcZ(ncRNA0002)	-	2827900	2827966	2827878	2827896	+	3511914	3511919	3511860	3511862	40	14.208	5.99e-10	CDS	sRNA	GTTTCTTCAACCCAATCGCTAGCGAAAAAGAAGAAGGCACCCGCCTGGATCTGGATCGCATCGCTCACTGGGTTGGCCAGGGCGCAACC	ATTTCCCTGGTGTTGGCGCAGTATTCGCGCACCCCGGTCAAACCGGGGTCATTTTTTTTC
rps16(SL1344_2649)	rpl19(SL1344_2646)	-	2828046	2828080	2828022	2828038	-	2826088	2826154	2826153	2826222	17	66.7607	1.95e-25	CDS	CDS	ATGTTATGGTAACTATTCGTTTAGCTCGTCACGGCGCTAAAAAGCGTCCGTTCTACCAG	TAAAATTTCCAACGGCGAAGGCGTTGAGCGTGTCTTCCAGACTCACTCTCCGGTAGTTGACAGCATTGCTGTTAAACGTCGTGGTGCTGTTCGTAAAGCTAAACTGTACTACCTGCGTGAGCGTACTGGTAAAGC
rps16(SL1344_2649)	rpl19(SL1344_2646)	-	2828059	2828098	2828024	2828058	-	2825989	2826086	2826130	2826178	13	7.223	6.42e-08	CDS	3UTR	TTTTATTCACACAAGAGGATGTTATGGTAACTATTCGTTTAGCTCGTCACGGCGCTAAAAAGCGTCCGTTCTACC	ACTCTCCGGTAGTTGACAGCATTGCTGTTAAACGTCGTGGTGCTGTTCGTAAAGCTAAACTGTACTACCTGCGTGAGCGTACTGGTAAAGCGGCTCGTATCAAAGAGCGTCTTAACTGATAACGCATTCACGCTACATCCAAAGCGTGTTGTAAAACAAGGGGTTAGCGAATTGCTGACCCCTTTTTTAT
rps16(SL1344_2649)	rpl19(SL1344_2646)	-	2828121	2828145	2828046	2828069	-	2825990	2826044	2826047	2826178	12	18.6458	6.01e-12	5UTR	3UTR	GGCTTTTAATATGACGCCGGGCTCCGTTCCTCGATGGGGCCCGGTTGTTTTATTCACACAAGAGGATGTTATGGTAACTATTCGTTTAGCTCGTCACGGC	ACTCTCCGGTAGTTGACAGCATTGCTGTTAAACGTCGTGGTGCTGTTCGTAAAGCTAAACTGTACTACCTGCGTGAGCGTACTGGTAAAGCGGCTCGTATCAAAGAGCGTCTTAACTGATAACGCATTCACGCTACATCCAAAGCGTGTTGTAAAACAAGGGGTTAGCGAATTGCTGACCCCTTTTTTA
rpsB(SL1344_0217)	STnc2180(ncRNA0291)	+	254260	254285	254324	254330	-	1992862	1992870	1992903	1992915	19	1058.5	1.05e-50	5UTR	sRNA	AACCCCAACTTAATCTATAGAGGTTTTAAATCATGGCAACTGTTTCCATGCGCGACATGCTCAAGGCTGGT	AATAATCAAAGCAATAAGCAGTGTCGTGAAACCACCTACGGGTGGTTTTTTTGT
rpsF(SL1344_4324)	STnc2110(ncRNA0286)	+	4650999	4651072	4651092	4651097	-	4030645	4030670	4030683	4030703	125	19.6013	7.77e-112	5UTR	sRNA	CGTCATTTTTCAGCCGACCTTTAACACGTTCCTTGCCTCCATGGGCCGCGGCTGACCCAGACAGGAGGCTGAATAATCCGTAAGGAGCAATTCGATGCG	CATTAAATAGCTAATGAGCTCCTTGCCTTGCCCCGCCAGAGATGGCGGGGCTTTTTTTA
rpsF(SL1344_4324)	STnc930(ncRNA0210)	+	4650999	4651085	4651103	4651110	+	514513	514581	514483	514532	153	210.745	5.76e-289	CDS	sRNA	CGTCATTTTTCAGCCGACCTTTAACACGTTCCTTGCCTCCATGGGCCGCGGCTGACCCAGACAGGAGGCTGAATAATCCGTAAGGAGCAATTCGATGCGTCATTACGAAATC	ACTTTTTGACGCATTGGCTGGACAATCCGCATCTACCTTATTCCCCCGAATGAGAGATCTCTTCCAGCAAGCCAGACATTCAGTCTGGCTTTTTTTTGG
rpsI(SL1344_3316)	rplQ(SL1344_3381)	-	3533814	3533982	3533761	3533764	-	3604312	3604322	--	--	62	33.4765	1.06e-53	3UTR	3UTR	CGATCCGTCACGGTATCACCCGCGCTCTGATGGAGTACGACGAGTCCCTGCGTGGCGAACTGCGTAAAGCTGGCTTCGTTACTCGTGACGCTCGTCAGGTTGAACGTAAGAAAGTCGGCCTGCGTAAAGCACGTCGTCGTCCGCAGTTCTCCAAACGTTAATGGGGTTCTGCTTCGGCAGACAACTGTTAGCGAAAAAACCCGCTTCGGCGGGTTTTTTTAT	AAAAACCCGCTTCGGCGGGTTTTTTTATACC
rpsJ(SL1344_3408)	STnc440(ncRNA0162)	-	3617913	3617986	3617868	3617872	+	4580531	4580566	4580491	4580493	12	15.6159	4.46e-11	CDS	sRNA	GCCTGAAAGCGTTTGATCATCGTCTGATCGATCAATCAACCGCGGAAATCGTCGAGACTGCCAAGCGCACTGGTGCGCAGGTTCGCGGTCCGATCCCGCTGCCGACCCGCAAAGAGCGC	GATTACTTTGTGGTGTAGCGTAACGGTAATTGTCCTCCTCATATTTGCGGCAGCGTAGTCTGCCGCTTTTTTTTAT
rpsJ(SL1344_3408)	STnc2110(ncRNA0286)	-	3618025	3618182	3617995	3618043	-	4030644	4030678	4030686	4030741	1056	145.561	0	5UTR	sRNA	GGCTTGTCGTAATTGACGGCAGGTTCGATTTGAACCTCGAATAGCCGATTTGGCTATTTAACAATGCTCCCAATCGGGGAGCTACGTAAGAACGGTTACACTCTCCCATCAATCGTAATGGGTGTGAGGAGTAATCATTTTCGTTTATAAAATAATTGGAGCTCTGGTCTCATGCAGAACCAAAGAAT	CATTGCGCCGCAGCGTATCGCCATTAACGAACGCTCCGCATTAAATAGCTAATGAGCTCCTTGCCTTGCCCCGCCAGAGATGGCGGGGCTTTTTTTAT
rpsL(SL1344_3415)	ArcZ(ncRNA0002)	-	3624216	3624261	3624190	3624198	+	3511888	3511918	3511860	3511863	97	362.116	9.93e-129	5UTR	sRNA	GCGTCCTCATATTGTGTGAGGGCGTTTTATTACGTGTTTACGAAGCAAAAGCTAAAACCAGGAGCTATTTAA	ATTTCCCTGGTGTTGGCGCAGTATTCGCGCACCCCGGTCAAACCGGGGTCATTTTTTTT
rpsM(SL1344_3385).rpsK(SL1344_3384).IGR	STnc870(ncRNA0205)	-	3606847	3606868	3606823	3606829	+	4292577	4292600	4292540	4292541	36	26.9043	4.24e-38	IGR	sRNA	ATCAAGAAATAATCGGGGTGATTGAATAATGGCAAAGGCACCAGTT	GTTTTCCTTGCCATAGACACCATCCCTGTCTTCCCCCACATGATGTGGGGGTTTTTTTTAT
rpsU(SL1344_3183)	InvR(ncRNA0023)	+	3394732	3394747	3394767	3394769	+	3067557	3067588	3067501	3067520	22	6.01959	7.07e-11	5UTR	sRNA	ACCGAATTAATCAAAGGTGAGAGGCACATGCCGGTAAT	CACTTTTACGGTTGGCCATTTGTCTCTTACGTTGCATTTATCAATCTGCTTTTTGATACAGCAGCACCTCGCTGCTGCTTTTTTTATT
rstA(SL1344_1405)	MgrR(ncRNA0043)	-	1508237	1508295	1508209	1508212	+	1550835	1550844	1550764	1550767	16	40.3108	2.56e-20	CDS	sRNA	TCAATTATGATGGTCTGGATCGCAGCGTGGATGTAGCGATTTCCCGCCTGCGTAAGAAACTGCTGGATAGCGCTGCTGAGCCCTATC	AATTTGCCCGGTAGCGTATAAGCAAAACACAAATCTATCCATGCAAGCATTTACCGCTGGTGAACCGGCGGTTTTTTTTTG
RUF_121(ncRNA0503)	Spf(ncRNA0075)	-	2012859	2012884	2012807	2012845	+	4230559	4230615	4230505	4230539	76	13.9458	3.63e-43	sRNA	sRNA	GATTTCTTTTATGCGTTGTAGATTTTTGCCGGTTATGCCGTAAAAGGTCTCCCGCCGTAACGTACAGCGGGAGTATGC	AGGGTACAGAGGTAAGATGTTCTATCTTTCAGACCTTTTACTTCACGTAATCGGATTTGGCTGAATATTTTAGCCGCCCCAGTCAGTTTATGACTGGGGCGTTTTTTATTG
RUF_167(ncRNA0508)	STnc2040(ncRNA0281)	-	1015013	1015030	1014981	1014983	-	1819353	1819361	1819407	1819416	15	60640.5	2.97e-60	sRNA	sRNA	AATTTTTAAAATTTATTTTTATTAGGATAATCAAAAAGTTACACCGTAAT	CATTCTAAAAATAAAAAGTAACTTTTGATTATCCTTTGCGCGGCGTTAGACCGCGCTTTTTTTT
Sar(ncRNA0069)	SL1344_0994(SL1344_0994)	+	2071320	2071370	2071408	2071408	-	1098807	1098811	1098842	1098842	13	20.859	2e-13	sRNA	CDS	TATTTACCGTTAAACTGTTCATGCGTTGGTTTTCTCCATAAAATTTGACGCCACGGCGCCCGGAGCTGCACACTCGCGGGCGTCACCCT	GGGGGGGCGGAGGTTCAAATCCTCTCGTGCCGACCA
sbmA(SL1344_0371)	ArcZ(ncRNA0002)	+	429834	429861	429878	429881	+	3511913	3511918	3511860	3511861	33	454.647	3.44e-71	5UTR	sRNA	GGAGAGCATGATGTTTAAATCTTTTTTCCCAAAGCCAGGGCCGTTTTT	ATTTCCCTGGTGTTGGCGCAGTATTCGCGCACCCCGGTCAAACCGGGGTCATTTTTTTT
sdaC(SL1344_2950)	ArcZ(ncRNA0002)	+	3142109	3142211	3142224	3142235	+	3511885	3511919	3511859	3511867	710	1833.7	0	5UTR	sRNA	CGAAAATTATTACGGCGAAAAATTATATAAAAAGCGTCCCTAAGCAGATTTCATTTTACGATCAGGTCTTTTTTCATTGGATTAGACCAGCAACCTGATTTTTAGCATCCTCCAGGAGAAATAGATG	GATTTCCCTGGTGTTGGCGCAGTATTCGCGCACCCCGGTCAAACCGGGGTCATTTTTTTTC
sdaC(SL1344_2950)	RprA(ncRNA0058)	+	3142150	3142184	3142205	3142209	-	1401682	1401686	1401731	1401735	15	246.909	5.68e-31	5UTR	sRNA	AAGCAGATTTCATTTTACGATCAGGTCTTTTTTCATTGGATTAGACCAGCAACCTGATTT	AACGAATTGCTGTGTGTAGTCTTTGCCCGTCTCCTACGATGGGCTTTTTTTTTA
SdsR(ncRNA0070)	SL1344_1792(SL1344_1792).SL1344_1791(SL1344_1791).IGR	-	1925647	1925704	1925620	1925621	-	1915898	1915903	--	--	11	190.4	9.97e-22	sRNA	IGR	CATTAATGCCAACTTTTAGCGCACGGCTCTCTCCCAAGAGCCATTTCCCTGGACCGAATACAGGAATCGTATTCGGTCTCTTTTT	TCGTATTCGGTCTCTTTTTTTCTTAT
secB(SL1344_3667)	STnc290(ncRNA0149)	-	3917825	3917839	3917803	3917803	-	3215637	3215645	3215682	3215692	19	341.204	2.24e-41	5UTR	sRNA	GACAACACTAAAGGGTTTTACACATGTCAGAACAAAA	CAAAATGTCGTATTCTGACATGTTTACGAAGGGAGTACCGCTCCCTTCTTTTTTTG
secB(SL1344_3667)	ArcZ(ncRNA0002)	-	3917843	3917946	3917815	3917826	+	3511913	3511917	3511859	3511862	61	113.822	6.13e-72	5UTR	sRNA	ATTTTTATTGATGCACAGCACATTGGCGGTTGTGACGACTTGTATGCGCTGGATGCGCGTGGTGGACTGGATCCGCTGTTGCGTTAAGGCGTACTCAAGTATTTAAGGACAACACTAAAGGGTTTTACACAT	GATTTCCCTGGTGTTGGCGCAGTATTCGCGCACCCCGGTCAAACCGGGGTCATTTTTTT
secD(SL1344_0402)	ArcZ(ncRNA0002)	+	462104	462244	462262	462266	+	3511913	3511918	3511860	3511865	84	302.902	1.04e-121	CDS	sRNA	GATAAATATGTCGTGGCGCTTAACCTTGCGCCGGCTACGCCGCGCTGGTTGGCGGCTATTCACGCCGATCCGATGAAGCTCGGTCTTGATCTGCGCGGCGGCGTTCACTTCCTGATGGAAGTGGATATGGATACCGCGTTAGGTAAACTCCAGGAACAAAATA	ATTTCCCTGGTGTTGGCGCAGTATTCGCGCACCCCGGTCAAACCGGGGTCATTTTTTTT
sfbA(SL1344_0503)	GcvB(ncRNA0014)	+	570516	570582	570573	570589	+	3156913	3156985	3156798	3156909	27	21.4405	8.66e-26	5UTR	sRNA	ATAGCCTTTCGTTTGGGCCAAAACAGACGATGCCGCATGAACGGCATCCGGCACAGCATCACACTATTTAAAAT	AAGTTTTATCGGAATGCGTGTTCTGATGGGCTTTTGGCTTACGGTTGTGATGTTGTGTTGTTGTGTTTGCAATTGGTCTGCGATTCAGACCACGGTAGCGAGACTACCCTTTTTCACTTCCTGTACATTTACCCTGTCTGTCCATAGTGATTAATGTAGCACCGCCATATTGCGGTGCTTTTTTTTGT
sicP(SL1344_2859)	ArcZ(ncRNA0002)	-	3046657	3046708	3046634	3046636	+	3511894	3511919	3511860	3511863	358	9828.13	0	CDS	sRNA	TTAAATTTGAAGAAGCAATCTTATAAAAGATATAATTCAAGAGGAAAGTAAATTGCAAGCACACCAGGATATTAT	ATTTCCCTGGTGTTGGCGCAGTATTCGCGCACCCCGGTCAAACCGGGGTCATTTTTTTTC
sipF(SL1344_2860)	ArcZ(ncRNA0002)	-	3047007	3047037	3046982	--	+	3511914	3511918	--	3511861	32	843.713	1.81e-47	CDS	sRNA	TTTGCGGATATATGCCGTGTTGTTAAAAAAAGTCTTGAGTCCAGGGTGTAGTATTT	CGGTCAAACCGGGGTCATTTTTTTT
SL1344_0018(SL1344_0018).SL1344_0019(SL1344_0019).IGR	ArcZ(ncRNA0002)	+	19997	20004	20042	20047	+	3511915	3511919	--	--	22	2121.39	8.55e-57	IGR	sRNA	ATGATTCAAGCCCTGGTTTACCGGGGCTTTTCTCCACCAGGGACAGAGGAA	GGTCAAACCGGGGTCATTTTTTTTC
SL1344_0032(SL1344_0032).SL1344_0033(SL1344_0033).IGR	ArcZ(ncRNA0002)	+	35145	35150	--	--	+	3511913	3511918	3511860	3511862	13	8773.84	2.28e-36	IGR	sRNA	CTTTTATAGTAGCGCCAGGGAAATAA	ATTTCCCTGGTGTTGGCGCAGTATTCGCGCACCCCGGTCAAACCGGGGTCATTTTTTTT
SL1344_0139(SL1344_0139)	MgrR(ncRNA0043)	-	162543	162569	162513	162520	+	1550835	1550845	1550786	1550798	11	50.5178	2.03e-15	CDS	sRNA	AATTTCCGGCCATAAGAGCCGTTTTGCCATTCGCTTTATGCCGCTGGATAGTGAAAA	CAAAACACAAATCTATCCATGCAAGCATTTACCGCTGGTGAACCGGCGGTTTTTTTTTGC
SL1344_0413(SL1344_0413)	STnc2110(ncRNA0286)	+	471498	471547	--	--	-	4030646	4030653	4030691	4030701	12	186.716	1.47e-23	CDS	sRNA	GAGGCATAACGTATGGCATGTGGCGAGTTTTCCCTGATTGCCCGTTATTTTGACCGTGTAAGAAGCTCTC	TTAAATAGCTAATGAGCTCCTTGCCTTGCCCCGCCAGAGATGGCGGGGCTTTTTTT
SL1344_0471(SL1344_0471)	RprA(ncRNA0058)	+	533999	534012	534035	534038	-	1401683	1401686	1401731	1401732	14	450.044	1.52e-32	CDS	sRNA	GACACTTCATTCTCATGACTATGTTGCAGCTTTATAAACG	GAATTGCTGTGTGTAGTCTTTGCCCGTCTCCTACGATGGGCTTTTTTTTT
SL1344_0489(SL1344_0489).AS	ArcZ(ncRNA0002)	+	555604	555660	555678	555682	+	3511913	3511918	3511860	3511861	34	225.03	6.76e-65	Antisense	sRNA	GTACAGATGTAGCGCCCCTACGGCTACCACGTAGCGTCCCGGCGGCAGTGCCAGCAGCGCGTCGCGCCAGGCTTCATTG	ATTTCCCTGGTGTTGGCGCAGTATTCGCGCACCCCGGTCAAACCGGGGTCATTTTTTTT
SL1344_0630(SL1344_0630)	ArcZ(ncRNA0002)	-	704173	704408	704151	704233	+	3511882	3511923	3511860	3511870	1153	5324.77	0	5UTR	sRNA	GCCAGGCTTTTTTCACCTTGCAGAGCTTTGCAGAAATTGTTTTACAAAAATGGCGATGCTTTCTGTGACGTGGGATGGGATGATAATCTGGTTTTAAACGCCGATCCGGCGACATAAGTCCCGGTATCGCCGCTGATTCAGGTATACTACACGGCGTCCCGCCGGAAGGTTAGCGTTAACTCGCAACGCCTTACCGGTCCAGCCTGTTGGCCTTTTTTCTATCGTTATAACGCAATTATTCACCCAGGGGGAAAACTT	ATTTCCCTGGTGTTGGCGCAGTATTCGCGCACCCCGGTCAAACCGGGGTCATTTTTTTTCCGCG
SL1344_0791(SL1344_0791).SL1344_0792(SL1344_0792).IGR	STnc1560(ncRNA0255)	+	880020	880023	880064	880065	+	2449129	2449181	2449087	2449090	25	1785.43	2.45e-71	IGR	sRNA	CAGGCATAATGCCGGATGGCGGCGTGAACGCCTTATCCGGCCTACG	CTAATGCCGGATGGCGGCGTGAACGCCTTGTCCGGCCTACAGGTGAGATACCGTTGTAGGCCGGATAAGACGCGTTAGCATCGCCATCCGGCATT
SL1344_0834(SL1344_0834).AS	ArcZ(ncRNA0002)	-	930884	930907	930866	930866	+	3511916	3511918	3511860	3511862	19	1165.84	9.19e-47	Antisense	sRNA	GTGATATTGTCCGGTCGGTTATTTTTTACACGCCAGGGGATT	ATTTCCCTGGTGTTGGCGCAGTATTCGCGCACCCCGGTCAAACCGGGGTCATTTTTTTT
SL1344_0847(SL1344_0847).AS	ArcZ(ncRNA0002)	-	944172	944203	944143	944144	+	3511916	3511917	3511860	3511864	17	286.851	1.03e-34	Antisense	sRNA	GAGTTCTTGCCAAAACGATCGGGTAGGCATAAATACCACGCGCATTAACACCAGGCAAAAC	ATTTCCCTGGTGTTGGCGCAGTATTCGCGCACCCCGGTCAAACCGGGGTCATTTTTTT
SL1344_0878(SL1344_0878).AS	ArcZ(ncRNA0002)	-	973718	973802	973690	973695	+	3511913	3511917	3511860	3511862	16	39.2688	2.99e-20	Antisense	sRNA	AGGCAACGCCGTGAGATGTTCGCGTTCTTCTTCCCGATCGTTATTAAGCAGACTGCGGACCGTCGCGGCATATTTTTTCCCCGCTTCGTCGCCATCCACCAGGACATGCCACT	ATTTCCCTGGTGTTGGCGCAGTATTCGCGCACCCCGGTCAAACCGGGGTCATTTTTTT
SL1344_1008(SL1344_1008)	MgrR(ncRNA0043)	-	1116568	1116607	1116487	1116549	+	1550818	1550845	1550760	1550803	206	689.162	0	5UTR	sRNA	CCCTTTTACAACAGACTAAAAAACCTCAACTTTGACCATTACGAAACTTGCATGGCGTGATCTGGTTCCGGATAGCGAAAGCTATCAGGAGATATTTGCACAGCCACACGCGACTGACGAA	CAAGAATTTGCCCGGTAGCGTATAAGCAAAACACAAATCTATCCATGCAAGCATTTACCGCTGGTGAACCGGCGGTTTTTTTTTGC
SL1344_1075(SL1344_1075)	STnc870(ncRNA0205)	+	1183844	1183887	1183915	1183986	+	4292582	4292600	4292539	4292556	43	150.413	1.28e-75	CDS	sRNA	ATTCACGGTAGCGCGTTGGCGCCGCATCTGGAAATTGTCAGTTACGTGTTGACGGGGATCGTGGCATTCCTGATGTGTATCCAGGCAAAGCAGCTATTGCTTTCTTTTGTTCCGGGAACATTTATCGGCGCCTGCGCGACATT	TGTTTTCCTTGCCATAGACACCATCCCTGTCTTCCCCCACATGATGTGGGGGTTTTTTTTAT
SL1344_1093(SL1344_1093)	MgrR(ncRNA0043)	+	1199856	1199884	1199895	1199915	+	1550823	1550845	1550794	1550800	22	236.593	3.07e-42	5UTR	sRNA	TGCCCACTTTATTTTTTGCTGATTGCAGGATACGTACACCATGCCAGTGTTACACAACCG	AAATCTATCCATGCAAGCATTTACCGCTGGTGAACCGGCGGTTTTTTTTTGC
SL1344_1093(SL1344_1093)	ArcZ(ncRNA0002)	+	1200948	1200972	1200997	1201008	+	3511913	3511917	3511861	3511861	18	189.83	6.18e-34	3UTR	sRNA	ATATTTTGCCGGATAGCGGCGTAAAGGCCGCTATCCGGCATTTCGCCAGGCGTTACTTCTG	TTTCCCTGGTGTTGGCGCAGTATTCGCGCACCCCGGTCAAACCGGGGTCATTTTTTT
SL1344_1190(SL1344_1190)	SdsR(ncRNA0070)	-	1295246	1295254	--	--	-	1925620	1925646	1925690	1925695	30	904.205	2.65e-74	CDS	sRNA	GGTTCTCTTTTAACGGGGTGTGCTACAGG	CAACTTTTAGCGCACGGCTCTCTCCCAAGAGCCATTTCCCTGGACCGAATACAGGAATCGTATTCGGTCTCTTTTT
SL1344_1211(SL1344_1211).SL1344_1210(SL1344_1210).IGR	ArcZ(ncRNA0002)	-	1310409	1310412	1310376	1310380	+	3511913	3511917	3511860	3511860	11	742.383	2.59e-26	IGR	sRNA	TTTTTTATTGGCGGTTACGCCGCGCCGGGAGCATAAC	ATTTCCCTGGTGTTGGCGCAGTATTCGCGCACCCCGGTCAAACCGGGGTCATTTTTTT
SL1344_1218(SL1344_1218).SL1344_1217(SL1344_1217).IGR	ArcZ(ncRNA0002)	-	1315120	1315122	--	--	+	3511913	3511918	3511859	3511861	11	106.055	8.21e-19	IGR	sRNA	TGTTCATATTGCACCAGGAGTGA	GATTTCCCTGGTGTTGGCGCAGTATTCGCGCACCCCGGTCAAACCGGGGTCATTTTTTTT
SL1344_1221(SL1344_1221)	STnc470(ncRNA0165)	+	1321016	1321031	1321050	1321080	-	94650	94660	94707	94741	28	758.954	5.91e-70	CDS	sRNA	ACATTTGAATAAGGAATTATGGATTGTGACCAAACTTAAACTTCTGGCTCTTGGCGTGTTTATTG	CATGAAATAATAAGAGAGCGCCAGCAAGGTGCCATGTTACGTCACAATCCACTCAGGGCCGTCTGGAAACGGATGCTGGCCCTCTTTTTTAT
SL1344_1226(SL1344_1226)	InvR(ncRNA0023)	+	1326845	1326873	1326882	1326902	+	3067530	3067589	3067502	3067512	1217	35858.1	0	CDS	sRNA	AGGCAATGTGAGCACGTTTAAAGTGAGATGTGAGCAAATGGCTAACCAACCTTCAGCA	ACTTTTACGGTTGGCCATTTGTCTCTTACGTTGCATTTATCAATCTGCTTTTTGATACAGCAGCACCTCGCTGCTGCTTTTTTTATTT
SL1344_1255(SL1344_1255)	STnc870(ncRNA0205)	-	1358346	1358374	1358308	1358316	+	4292578	4292600	4292531	4292561	42	1103.83	1.4e-103	5UTR	sRNA	GCGAACAGAATCGCTAAAACACAGCGCTTCATAATAAAAAAATCAGGAGAACGGGGATGAATTTTCC	AACAACCCTGTTTTCCTTGCCATAGACACCATCCCTGTCTTCCCCCACATGATGTGGGGGTTTTTTTTAT
SL1344_1262(SL1344_1262)	MgrR(ncRNA0043)	+	1363218	1363248	1363271	1363275	+	1550836	1550845	1550789	1550798	16	150.094	1.57e-28	CDS	sRNA	CGTCTCTGTATGCCGCCGCCGATGATTCCGTTTTTACTGTCATGGATGATCCCTCCAC	AACACAAATCTATCCATGCAAGCATTTACCGCTGGTGAACCGGCGGTTTTTTTTTGC
SL1344_1384(SL1344_1384)	Spf(ncRNA0075)	-	1484819	1484901	1484792	1484809	+	4230553	4230612	4230512	4230533	63	4.17273	5.99e-19	5UTR	sRNA	CCGTTTCCCCTCCAATATAACAATCGGACGGATGAGTCTGACTCATCACGCGCCAGACAATCCCTGTTAATACGGGGCGTAAAAAAGAGGTAAAAGTGTCTACTGCAAAC	AGAGGTAAGATGTTCTATCTTTCAGACCTTTTACTTCACGTAATCGGATTTGGCTGAATATTTTAGCCGCCCCAGTCAGTTTATGACTGGGGCGTTTTTTA
SL1344_1392(SL1344_1392)	STnc2110(ncRNA0286)	-	1491938	1491991	1491905	1491908	-	4030646	4030653	4030694	4030703	13	59.817	3.66e-19	CDS	sRNA	AAAGCATTTGCCTTTTCGCCCGTCTCAGATGCCTTTGCCGTGCGTCAGTTACTCTTCCCACTGTTGGCAACGGCGCTCATTGTGCCT	CATTAAATAGCTAATGAGCTCCTTGCCTTGCCCCGCCAGAGATGGCGGGGCTTTTTTT
SL1344_1393(SL1344_1393)	OxyS(ncRNA0050)	-	1492641	1492745	1492621	1492625	-	4364302	4364331	4364348	4364359	117	2276.78	7.99e-284	5UTR	sRNA	CCAGGCGCCATGTGGCGCCTGACTCTTTACCGGTAAGAATATTCCCTTTTTACCTGCACCCCTGACCTCTCACTGGTGCGGTTTTGTTTATTTTTTATCAGTGACTACTCCGTTGGCATTATATT	CCCGAAATAACTAAAGCCAACGTGAACTTTTGCGGACCTCTGGTCCGCTTTTTTTTTG
SL1344_1394(SL1344_1394)	ArcZ(ncRNA0002)	+	1493285	1493302	1493321	1493328	+	3511915	3511918	--	--	22	674.893	5.17e-26	CDS	sRNA	CTTTCATGCGCCCTTAATTATGGGAACGCCAGGGCTAGAGCTTG	GGTCAAACCGGGGTCATTTTTTTT
SL1344_1408(SL1344_1408).pntA(SL1344_1408).IGR	ArcZ(ncRNA0002)	+	1512202	1512250	1512269	1512275	+	3511913	3511919	3511860	3511867	101	5686.87	7.03e-271	IGR	sRNA	AAGCTAATGAAGCGCATAAATTTAATAAGTTAATTTAATGTTAATTTCTTGATCGCGCCAGGGGTTTAATGATG	ATTTCCCTGGTGTTGGCGCAGTATTCGCGCACCCCGGTCAAACCGGGGTCATTTTTTTTC
SL1344_1516(SL1344_1516)	MgrR(ncRNA0043)	-	1629255	1629285	1629229	1629232	+	1550835	1550844	1550792	1550796	11	969.942	3.45e-26	CDS	sRNA	AGTTATTTATATGCTCAGGTTTGGGCATGATGTTTTTTATGCTTGCGGGTTGTACAA	ACAAATCTATCCATGCAAGCATTTACCGCTGGTGAACCGGCGGTTTTTTTTTG
SL1344_1517(SL1344_1517)	RfrB(ncRNA0056)	-	1630548	1630581	1630524	1630537	-	1309724	1309759	1309783	1309784	60	2323.21	7.79e-176	5UTR	sRNA	ACTTATAATAAGTGCGGAACGAAGATCCCGCGCAGCGAAGTAGTGTGAAGCAGCTATA	ACATTGCTCACATTGCTTCCAGTATTATTTGCCCGCCTCACCGAGTGCGGGCTTTTTTTGC
SL1344_1517(SL1344_1517)	RfrA(ncRNA0055)	-	1630553	1630581	1630523	1630537	-	3736721	3736755	3736777	3736779	29	1899.7	7.91e-84	5UTR	sRNA	ACTTATAATAAGTGCGGAACGAAGATCCCGCGCAGCGAAGTAGTGTGAAGCAGCTATAC	GACATTGCTCACATTGCTTCCAGTATTATTTTGGCCAGCTTTTGCTGGCTTTTTTTTTG
SL1344_1537(SL1344_1537)	MgrR(ncRNA0043)	-	1655023	1655091	1654965	1654967	+	1550817	1550845	1550794	1550806	60	109.354	1.56e-95	CDS	sRNA	TTGCATCATTGCGAAGACTAAAGGGATCGTTTCATGCGTACTCATACTTTATTTAAAGTTGCAGTGCTTACTGGCTTGCTGGCGTTATCCGGCTGTGCGTCTAAAGTCACACAGCCGGATAAGTATT	AAATCTATCCATGCAAGCATTTACCGCTGGTGAACCGGCGGTTTTTTTTTGC
SL1344_1627(SL1344_1627)	ArcZ(ncRNA0002)	-	1746584	1746610	1746559	1746562	+	3511913	3511919	3511859	3511861	97	829.574	6.21e-224	5UTR	sRNA	TCGTTTTTATTGATTGATTTGCGTTAAAAGCGCATTATCAGGGAGTTAAGAT	GATTTCCCTGGTGTTGGCGCAGTATTCGCGCACCCCGGTCAAACCGGGGTCATTTTTTTTC
SL1344_1678(SL1344_1678).AS	STnc870(ncRNA0205)	-	1798447	1798511	1798424	1798428	+	4292594	4292599	4292541	4292557	18	3499.18	5.5e-50	Antisense	sRNA	GATATTTTTCTTTCAACTTATTGATTATAAAGAATAAATCAAAGATTTTTAACATTGTTTAACTGTTTTTTTGGGCAGGGATTTTTCC	TTTTCCTTGCCATAGACACCATCCCTGTCTTCCCCCACATGATGTGGGGGTTTTTTTTA
SL1344_1679(SL1344_1679).SL1344_1678(SL1344_1678).IGR	Spf(ncRNA0075)	-	1798699	1798707	1798662	1798667	+	4230577	4230612	4230531	4230531	11	30.8423	3.01e-11	IGR	sRNA	ATTATCAACATTACTGAGACCGTGAGAGGCGGTAGGTCTGTTATTT	TTTCAGACCTTTTACTTCACGTAATCGGATTTGGCTGAATATTTTAGCCGCCCCAGTCAGTTTATGACTGGGGCGTTTTTTA
SL1344_1685(SL1344_1685)	ArcZ(ncRNA0002)	-	1807828	1807912	1807792	1807823	+	3511885	3511918	3511859	3511862	107	1571.91	2.06e-209	5UTR	sRNA	ACAATAATCTCCCTGAATATAAAAAACGGCGTTGAACGCCAGGGTGGCATTATGTTAACTGAGCAGTGGCGATGTTGCTACGTCTTGAAGCCAGGGGAAGTCGTTAAGTACGATGAGAAAA	GATTTCCCTGGTGTTGGCGCAGTATTCGCGCACCCCGGTCAAACCGGGGTCATTTTTTTT
SL1344_1732(SL1344_1732)	STnc870(ncRNA0205)	+	1861091	1861151	1861171	1861178	+	4292580	4292598	4292541	4292542	14	1700.87	4.67e-37	5UTR	sRNA	TTAACATGGTGTTCTATGCTTGAAAGGAGGCGCTCCATACAGAGAGCGTCGCCAACAATGAGGGTGCGCGAATGGCAATGATTGATTC	TTTTCCTTGCCATAGACACCATCCCTGTCTTCCCCCACATGATGTGGGGGTTTTTTTT
SL1344_1778(SL1344_1778)	MgrR(ncRNA0043)	+	1903395	1903400	1903427	1903433	+	1550835	1550845	1550765	1550765	10	244.933	4.46e-20	CDS	sRNA	TGGAATGGCTGGATAGCCGCTTACTTTGGGATGCACATG	ATTTGCCCGGTAGCGTATAAGCAAAACACAAATCTATCCATGCAAGCATTTACCGCTGGTGAACCGGCGGTTTTTTTTTGC
SL1344_1917(SL1344_1917)	STnc870(ncRNA0205)	-	2030367	2030390	2030344	2030344	+	4292597	4292600	4292540	4292541	12	507.072	1.14e-27	5UTR	sRNA	GTCTTAGAAGAAAAGACCGAGGAAATCATTTTGGCAGGAAGTAGCTT	GTTTTCCTTGCCATAGACACCATCCCTGTCTTCCCCCACATGATGTGGGGGTTTTTTTTAT
SL1344_1967(SL1344_1967)	STnc870(ncRNA0205)	+	2072708	2072878	2072762	2072906	+	4292564	4292600	4292538	4292552	93	591.333	6.44e-178	CDS	sRNA	ATTTTTGTCGATATAAGCATCAACCAGTTCGATGGTGATGGCATCTATGTCTTTGGCTTTGATGATAAAATATACGTAAAAAGACTGCAGATGATCCCCGATAAATTATTGGTGATATCTGATAACACTAACTACAGGGAATGGAGTATTACCAAAGACAACGAGTGCAGGTTCGGTGTTTTTGGCAAGGTTCTGATAA	CTGTTTTCCTTGCCATAGACACCATCCCTGTCTTCCCCCACATGATGTGGGGGTTTTTTTTAT
SL1344_1967(SL1344_1967)	ArcZ(ncRNA0002)	+	2072820	2072829	2072853	2072856	+	3511913	3511918	3511860	3511861	21	75.3964	1.05e-31	CDS	sRNA	TGATATCTGATAACACTAACTACAGGGAATGGAGTAT	ATTTCCCTGGTGTTGGCGCAGTATTCGCGCACCCCGGTCAAACCGGGGTCATTTTTTTT
SL1344_2197(SL1344_2197)	ArcZ(ncRNA0002)	-	2319830	2319873	2319806	2319813	+	3511888	3511920	3511859	3511863	175	2092.42	0	5UTR	sRNA	TTGTCAATGATGTGTTAATATAAATGTAAGTAAATTGTGAAGTAATTGTGCTTCCGGGGAAAGAAAGT	GATTTCCCTGGTGTTGGCGCAGTATTCGCGCACCCCGGTCAAACCGGGGTCATTTTTTTTCC
SL1344_2263(SL1344_2263)	MgrR(ncRNA0043)	-	2400060	2400112	2400029	2400041	+	1550820	1550845	1550759	1550800	89	503.385	2.44e-187	CDS	sRNA	ATTGATTCCTCAGCGTCTGGCAGTACAATTCTGCCGTTTTGGGGAGTTTTTCTTTATGTGCTTGCTGGAAAGGGTAAAAATGAA	GCAAGAATTTGCCCGGTAGCGTATAAGCAAAACACAAATCTATCCATGCAAGCATTTACCGCTGGTGAACCGGCGGTTTTTTTTTGC
SL1344_2315(SL1344_2315)	STnc870(ncRNA0205)	-	2456623	2456697	2456584	2456655	+	4292562	4292601	4292540	4292546	127	654.445	3.22e-289	CDS	sRNA	AGAAATAAGAAGGTTTCCTGATGGTGGAACAGCGTCGTTTGGCAAGTACGGAATGGGTGGATATTGTGAATGAAGACAATGAAGTCATTGCACAGTCCAGCCGGGAACAGATGC	GTTTTCCTTGCCATAGACACCATCCCTGTCTTCCCCCACATGATGTGGGGGTTTTTTTTATC
SL1344_2327(SL1344_2327)	ArcZ(ncRNA0002)	-	2467153	2467183	2467118	2467126	+	3511913	3511917	3511861	3511861	12	1349.8	2.03e-30	CDS	sRNA	GTTTAAATAGCGAGCCGGTGGTATTACGGGCATTATCGCAAGAAGCCCAACGCCAGGGGAAAACGC	TTTCCCTGGTGTTGGCGCAGTATTCGCGCACCCCGGTCAAACCGGGGTCATTTTTTT
SL1344_2402(SL1344_2402).AS	MgrR(ncRNA0043)	-	2549227	2549290	2549140	2549189	+	1550819	1550846	1550792	1550811	16	47.345	2.35e-21	Antisense	sRNA	TATGTGCGCCAGCGCATTACCGCCGCCTTTTATAATAAAAGCTCGTCTGTTGTTCTTATTGTTGTATTTGTTCCTGGCAAAGCGTCATGTAATGCTTGCTGCTTTCTACCAGCCTGGCTGAACCAGGCCGGTAAAGTGACGGCGCTTTAAA	ACAAATCTATCCATGCAAGCATTTACCGCTGGTGAACCGGCGGTTTTTTTTTGCC
SL1344_2482(SL1344_2482)	ArcZ(ncRNA0002)	-	2651925	2651932	--	--	+	3511913	3511919	3511860	3511861	93	571.187	1.92e-204	CDS	sRNA	CGTAAATTACTTCTGCCAGGGTTGCTTT	ATTTCCCTGGTGTTGGCGCAGTATTCGCGCACCCCGGTCAAACCGGGGTCATTTTTTTTC
SL1344_2483(SL1344_2483)	SdsR(ncRNA0070)	-	2652437	2652487	2652408	2652455	-	1925620	1925621	1925684	1925701	17	110.348	6.88e-29	CDS	sRNA	TGATTTTAGGGGTTGGCGCGCTGGTTGGCTGGCGTTACTGGAGCAGCCATCAGACGGAGTCCGCGCGTGCTGCTTCTCTG	TAATGCCAACTTTTAGCGCACGGCTCTCTCCCAAGAGCCATTTCCCTGGACCGAATACAGGAATCGTATTCGGTCTCTTTTT
SL1344_2487(SL1344_2487)	ArcZ(ncRNA0002)	-	2657629	2657698	2657605	2657635	+	3511913	3511918	3511860	3511880	82	123.64	3.11e-135	5UTR	sRNA	CATCCTTACGCCAGAATTTGTACAATGCAGCGCCCCCGGACGAGCAGTAAGCTTACCGGGGCGTTTCTTTTTTCAACCCTCCAGGGGCCATAAC	ATTTCCCTGGTGTTGGCGCAGTATTCGCGCACCCCGGTCAAACCGGGGTCATTTTTTTT
SL1344_2503(SL1344_2503)	RprA(ncRNA0058)	-	2678599	2678611	2678555	2678576	-	1401684	1401686	1401730	1401734	18	1111.48	4.61e-48	CDS	sRNA	AAGAGCCTGCAATTTCTGGACGGTACACAGCTGGACTTCGTAAAAGAAGGTCTGAAC	ACGAATTGCTGTGTGTAGTCTTTGCCCGTCTCCTACGATGGGCTTTTTTTT
SL1344_2506(SL1344_2506)	Spf(ncRNA0075)	-	2681016	2681067	2680971	2681051	+	4230568	4230612	4230528	4230545	37	2.54411	1.18e-06	CDS	sRNA	GGTACCGTTGGCTGATATTTCTGAACGTCAGGGGATTTCCCTTTCTTATCTGGAACAGCTATTTTCCCGTTTACGTAAAAACGGTCTGGTTTCCAGC	ATCTTTCAGACCTTTTACTTCACGTAATCGGATTTGGCTGAATATTTTAGCCGCCCCAGTCAGTTTATGACTGGGGCGTTTTTTA
SL1344_2506(SL1344_2506)	ArcZ(ncRNA0002)	-	2681047	2681055	--	--	+	3511914	3511919	3511860	3511862	48	91.0392	4.87e-74	CDS	sRNA	TGATATTTCTGAACGTCAGGGGATTTCCC	ATTTCCCTGGTGTTGGCGCAGTATTCGCGCACCCCGGTCAAACCGGGGTCATTTTTTTTC
SL1344_2594(SL1344_2594)	STnc800(ncRNA0200)	+	2770115	2770126	2770147	2770150	-	4236850	4236857	4236893	4236900	12	179.823	1.68e-23	3UTR	sRNA	ATGCAATAGCGGCTTTACTTACACGGCAACAATAAT	TTTTTGAGTTGCCGTGGAAACTTTCAGCCCATCCCAGGATGGGCTTTTTTC
SL1344_2619(SL1344_2619).clpB(SL1344_2620).IGR	Spf(ncRNA0075)	+	2797788	2797833	--	--	+	4230601	4230612	4230560	4230578	32	44.862	3.62e-33	IGR	sRNA	GTGCTCCTCCGTTACTCTTTAGGAGGAGACCGCCCCAGTCAAACTACCCACCAGACACTGTCCGCA	TTTGGCTGAATATTTTAGCCGCCCCAGTCAGTTTATGACTGGGGCGTTTTTTA
SL1344_2662(SL1344_2662)	SdsR(ncRNA0070)	+	2850274	2850305	2850318	2850332	-	1925618	1925672	1925688	1925695	804	73824.2	0	CDS	sRNA	CAACAAGCGGTGATATTTAAAAGGGATAAACTATGGGAAGAGTCGCGCCTGTCGCCATC	CAACTTTTAGCGCACGGCTCTCTCCCAAGAGCCATTTCCCTGGACCGAATACAGGAATCGTATTCGGTCTCTTTTTAT
SL1344_2696(SL1344_2696)	ArcZ(ncRNA0002)	-	2878796	2878806	2878775	2878775	+	3511914	3511917	3511860	3511861	60	1500.7	3.55e-148	CDS	sRNA	AGAAGAAATGTATTATGACTGGGGAAGTAAAA	ATTTCCCTGGTGTTGGCGCAGTATTCGCGCACCCCGGTCAAACCGGGGTCATTTTTTT
SL1344_2698(SL1344_2698)	ArcZ(ncRNA0002)	-	2880137	2880162	2880116	2880116	+	3511913	3511917	3511860	3511861	10	674.885	9.17e-24	CDS	sRNA	TATTCAGGAAGTGTATGTTACTATCTTTGATAAGCATCAGGGATTGA	ATTTCCCTGGTGTTGGCGCAGTATTCGCGCACCCCGGTCAAACCGGGGTCATTTTTTT
SL1344_2752(SL1344_2752)	GcvB(ncRNA0014)	-	2933044	2933058	2933014	2933023	+	3156913	3156984	3156807	3156849	25	18.7963	9.91e-23	5UTR	sRNA	AGAACAAAGACAGTCATTAGCTCGCACAGCACACAACTAAGAATT	CGGAATGCGTGTTCTGATGGGCTTTTGGCTTACGGTTGTGATGTTGTGTTGTTGTGTTTGCAATTGGTCTGCGATTCAGACCACGGTAGCGAGACTACCCTTTTTCACTTCCTGTACATTTACCCTGTCTGTCCATAGTGATTAATGTAGCACCGCCATATTGCGGTGCTTTTTTTTG
SL1344_2752(SL1344_2752)	RprA(ncRNA0058)	-	2933044	2933058	2933015	2933023	-	1401682	1401692	1401727	1401732	54	1925.65	7.61e-109	5UTR	sRNA	AGAACAAAGACAGTCATTAGCTCGCACAGCACACAACTAAGAAT	GAATTGCTGTGTGTAGTCTTTGCCCGTCTCCTACGATGGGCTTTTTTTTTA
SL1344_2984(SL1344_2984)	MgrR(ncRNA0043)	+	3185588	3185687	3185742	3185811	+	1550825	1550845	1550787	1550798	43	120.783	1.4e-70	5UTR	sRNA	GCTCGATAAACGTAAGCGTATTGTCGCCGCTATTTTACACCGTTCCTGGTTGCGCAAATTCAGCCTGGGCTTTCGCCCGTCACTCGACGGGCCTATAATTACCGCTTCTTTTTTTGGCAGGACTTTGTTCGATGTTATTTGCATGGATAACCGATCCTAATGCCTGGCTGGCGCTCGGTACGCTGACGCTGCTGGAGATTGTACTTGGGATCGACAACATTATT	AAAACACAAATCTATCCATGCAAGCATTTACCGCTGGTGAACCGGCGGTTTTTTTTTGC
SL1344_2984(SL1344_2984)	MgrR(ncRNA0043)	+	3185690	3185786	3185732	3185808	+	1550813	1550847	1550759	1550808	1987	640.305	0	CDS	sRNA	CGCTTCTTTTTTTGGCAGGACTTTGTTCGATGTTATTTGCATGGATAACCGATCCTAATGCCTGGCTGGCGCTCGGTACGCTGACGCTGCTGGAGATTGTACTTGGGATCGACAACATT	GCAAGAATTTGCCCGGTAGCGTATAAGCAAAACACAAATCTATCCATGCAAGCATTTACCGCTGGTGAACCGGCGGTTTTTTTTTGCCT
SL1344_3084(SL1344_3084)	RprA(ncRNA0058)	-	3289264	3289268	--	--	-	1401682	1401687	1401731	1401732	11	437.862	9.39e-26	5UTR	sRNA	CGTTTTCAGAACTCAAACACAGCAG	GAATTGCTGTGTGTAGTCTTTGCCCGTCTCCTACGATGGGCTTTTTTTTTA
SL1344_3130(SL1344_3130).SL1344_3131(SL1344_3131).IGR	Spf(ncRNA0075)	+	3339196	3339227	3339244	3339252	+	4230565	4230612	4230521	4230543	22	15.4212	9.01e-17	IGR	sRNA	AAGCATAAGGATCGTTCTGATTCTCCCTCTTACGGTAGTAAAAGTGTCTACGCTTAA	ATGTTCTATCTTTCAGACCTTTTACTTCACGTAATCGGATTTGGCTGAATATTTTAGCCGCCCCAGTCAGTTTATGACTGGGGCGTTTTTTA
SL1344_3182(SL1344_3182)	MgrR(ncRNA0043)	-	3394536	3394548	3394506	3394511	+	1550821	1550844	1550792	1550798	20	629.88	1.68e-44	CDS	sRNA	GCGAGGTAAAACAAGTCATGCGTGTACTGGGTATTGAAACATC	ACAAATCTATCCATGCAAGCATTTACCGCTGGTGAACCGGCGGTTTTTTTTTG
SL1344_3198(SL1344_3198)	GcvB(ncRNA0014)	+	3414123	3414174	3414182	3414200	+	3156865	3156912	3156778	3156842	29	13.0166	1.83e-22	5UTR	sRNA	GCAAACACTTTGTTACATCCTGAAAGATGCGCCGTAAGAGCGTGCAGGGGATGACCAGCAACACAATACAAGGAATAT	ACTTCCTGAGCCGGAACGAAAAGTTTTATCGGAATGCGTGTTCTGATGGGCTTTTGGCTTACGGTTGTGATGTTGTGTTGTTGTGTTTGCAATTGGTCTGCGATTCAGACCACGGTAGCGAGACTACCCTTTTTC
SL1344_3198(SL1344_3198).SL1344_3199(SL1344_3199).IGR	MgrR(ncRNA0043)	+	3415653	3415686	--	--	+	1550835	1550844	1550794	1550804	21	220.46	7.09e-40	IGR	sRNA	TGCGATAAGCAAAATCAAAGCTCAACGACGCGTAATTTCTATAACGGACTTCGT	AAATCTATCCATGCAAGCATTTACCGCTGGTGAACCGGCGGTTTTTTTTTG
SL1344_3199(SL1344_3199)	MgrR(ncRNA0043)	+	3415688	3415746	3415758	3415772	+	1550823	1550845	1550779	1550807	274	200.44	0	5UTR	sRNA	TTTCTATAACGGACTTCGTTGACCTTTGTTACAATTAGATGCATTTTGAATTTTTGTGTGTTAGTGCTTGCTTACTTCACAACTT	GTATAAGCAAAACACAAATCTATCCATGCAAGCATTTACCGCTGGTGAACCGGCGGTTTTTTTTTGC
SL1344_3287(SL1344_3287)	ArcZ(ncRNA0002)	+	3502368	3502386	3502410	3502415	+	3511913	3511919	3511860	3511861	19	82.7371	1.52e-29	CDS	sRNA	GAAACGGATTATGTCGCATTTAGCGTTGCAACCGGGGTTTGACTTTCA	ATTTCCCTGGTGTTGGCGCAGTATTCGCGCACCCCGGTCAAACCGGGGTCATTTTTTTTC
SL1344_3335(SL1344_3335)	STnc870(ncRNA0205)	-	3551274	3551297	3551242	3551247	+	4292576	4292599	4292541	4292550	13	3158.69	3.39e-36	5UTR	sRNA	GATGCTTAGTAGTAAAACAGACAATTGTCTGTCGGGGATGGTGGCTGGCTATGAAT	TTTTCCTTGCCATAGACACCATCCCTGTCTTCCCCCACATGATGTGGGGGTTTTTTTTA
SL1344_3483(SL1344_3483)	ArcZ(ncRNA0002)	-	3701157	3701164	3701131	3701131	+	3511913	3511918	3511860	3511861	11	247.461	2.26e-22	3UTR	sRNA	TAAACAAATTTACACACCAGGACGTTGCCTGTTT	ATTTCCCTGGTGTTGGCGCAGTATTCGCGCACCCCGGTCAAACCGGGGTCATTTTTTTT
SL1344_3500(SL1344_3500)	ArcZ(ncRNA0002)	-	3719921	3719973	3719874	3719874	+	3511914	3511917	3511859	3511862	14	349.958	8.18e-30	CDS	sRNA	CGTTTACCCAGATCCATCAAAATTCAGGGATTGCGAAAAGCAGTACCTCATCTTTGCTCAACGGCATGGTGGAGCATGGGTTATTACGCCAGGAAAAAGA	GATTTCCCTGGTGTTGGCGCAGTATTCGCGCACCCCGGTCAAACCGGGGTCATTTTTTT
SL1344_3590(SL1344_3590).yhjV(SL1344_3591).IGR	STnc2110(ncRNA0286)	+	3830193	3830236	3830262	3830263	-	4030646	4030669	4030691	4030696	10	803.829	9.78e-26	IGR	sRNA	TAGCCTGGTTATAGGCAGCATTCTTTATGAGAGAGCTGCGTATATTTTGGGCAGGGGGCTCTATGCAGGAC	TAGCTAATGAGCTCCTTGCCTTGCCCCGCCAGAGATGGCGGGGCTTTTTTT
SL1344_3590(SL1344_3590).yhjV(SL1344_3591).IGR	STnc870(ncRNA0205)	+	3830197	3830238	3830261	3830269	+	4292576	4292600	4292540	4292542	24	1060.47	1.49e-59	IGR	sRNA	CTGGTTATAGGCAGCATTCTTTATGAGAGAGCTGCGTATATTTTGGGCAGGGGGCTCTATGCAGGACGACACA	GTTTTCCTTGCCATAGACACCATCCCTGTCTTCCCCCACATGATGTGGGGGTTTTTTTTAT
SL1344_3599(SL1344_3599)	ArcZ(ncRNA0002)	+	3840588	3840620	3840639	3840644	+	3511914	3511918	3511861	3511862	56	3781.57	6.91e-148	CDS	sRNA	GCGCAAAGTTGATTGATGTTGCCCGCCATGCAGGCGTGTCGCCAGGGACAGTATCCA	TTTCCCTGGTGTTGGCGCAGTATTCGCGCACCCCGGTCAAACCGGGGTCATTTTTTTT
SL1344_3613(SL1344_3613)	OmrB(ncRNA0049)	-	3856748	3856760	3856725	3856726	-	3191785	3191787	3191848	3191851	10	32.613	1.73e-12	5UTR	sRNA	TTTTTGGGTGAAAGGAGTATTAACAATGGCGACAGG	TGGAATCAACGTCATTGTTGATCACACGAATTACACCAACCTGCGTAGAGATGCGCAGGTTTTTTTT
SL1344_3673(SL1344_3673)	MgrR(ncRNA0043)	-	3923643	3923703	3923618	3923618	+	1550821	1550846	1550793	1550799	25	1837.23	5.35e-61	CDS	sRNA	TTATGAAAAATAGTAAAACCAAAGTGAGTATCATTGTCCCGTTATATAATGCGGGAGCGGATTTTAATGCTTGCATGGCGTCGTTA	CAAATCTATCCATGCAAGCATTTACCGCTGGTGAACCGGCGGTTTTTTTTTGCC
SL1344_3713(SL1344_3713)	ArcZ(ncRNA0002)	+	3962835	3962856	3962875	3962876	+	3511914	3511917	3511859	3511861	12	809.882	7.02e-29	CDS	sRNA	GGGCCGGTAGGATCGGGGCTGTTATCCATCCAGGGAACCAGT	GATTTCCCTGGTGTTGGCGCAGTATTCGCGCACCCCGGTCAAACCGGGGTCATTTTTTT
SL1344_3724(SL1344_3724)	ArcZ(ncRNA0002)	-	3979142	3979161	3979121	3979121	+	3511913	3511919	3511859	3511866	39	877.674	1.3e-91	CDS	sRNA	GAGACGGTTTTACCCGATTTTTATGTCTATCCAGGGAAAAG	GATTTCCCTGGTGTTGGCGCAGTATTCGCGCACCCCGGTCAAACCGGGGTCATTTTTTTTC
SL1344_3808(SL1344_3808)	ArcZ(ncRNA0002)	+	4067599	4067680	4067731	4067734	+	3511913	3511918	3511860	3511862	10	14.06	5.29e-09	CDS	sRNA	GAATTGAGGCATTGCGCAGGTTTGGAGTGATAAAAGGCAGTTGGTTGACGGTGAAACGCGTATTAAAATGCCACCCTTTACACCCTGGTGGTGACGATCCCGTCCCGCCCGGACCATTTGATACCAGAGAACACTA	ATTTCCCTGGTGTTGGCGCAGTATTCGCGCACCCCGGTCAAACCGGGGTCATTTTTTTT
SL1344_3812(SL1344_3812)	RprA(ncRNA0058)	+	4072793	4072831	4072842	4072853	-	1401682	1401687	1401731	1401732	24	3370.49	1.6e-73	CDS	sRNA	GTACGTGCACCAATTCCCCCCAGTTTTAGGGATAGACTACTCACTTACACAGCAAAAAATG	GAATTGCTGTGTGTAGTCTTTGCCCGTCTCCTACGATGGGCTTTTTTTTTA
SL1344_3857(SL1344_3857)	Spf(ncRNA0075)	-	4120981	4120988	4120947	4120954	+	4230556	4230612	4230509	4230516	11	17.3488	1.82e-09	5UTR	sRNA	TAACCAAACGAAAGAGAAAGGAAGAACATTCATGCCTTTAAG	TACAGAGGTAAGATGTTCTATCTTTCAGACCTTTTACTTCACGTAATCGGATTTGGCTGAATATTTTAGCCGCCCCAGTCAGTTTATGACTGGGGCGTTTTTTA
SL1344_3907(SL1344_3907).AS	ArcZ(ncRNA0002)	+	4180998	4181004	--	--	+	3511916	3511919	3511859	3511862	23	2587.49	3.85e-60	Antisense	sRNA	CTTACTTTCCAAAATCCAGGGAAACCA	GATTTCCCTGGTGTTGGCGCAGTATTCGCGCACCCCGGTCAAACCGGGGTCATTTTTTTTC
SL1344_3916(SL1344_3916)	STnc2170(ncRNA0289)	+	4188391	4188415	4188428	4188460	-	1553669	1553678	1553707	1553710	22	9198.47	1.54e-78	CDS	sRNA	AATTTATCCAGCGGAAATCGCTTTGCTTAGAGGTTAAATTTTATTATGTATCAGGTTGTTGCGTCTGATT	CACCTTTAACCTCTTTGCCCCGTTTTGCGGGGCATTTTTTTA
SL1344_3984(SL1344_3984)	STnc870(ncRNA0205)	-	4269226	4269284	4269192	4269249	+	4292595	4292599	4292542	4292542	10	15.1613	2.55e-09	CDS	sRNA	GTGAAAGAGAAGTGACAATGTCGAAACAAGGAGCAAACCATGCAGGTCAGCAGAAGGCAGTTCTTTAAGATCTGCGCTGGCGGTATGGCAGGC	TTTCCTTGCCATAGACACCATCCCTGTCTTCCCCCACATGATGTGGGGGTTTTTTTTA
SL1344_3984(SL1344_3984)	STnc2110(ncRNA0286)	-	4269271	4269290	4269243	4269246	-	4030646	4030653	4030686	4030694	11	49.7391	1.4e-15	5UTR	sRNA	AGAAATGTGAAAGAGAAGTGACAATGTCGAAACAAGGAGCAAACCATG	GCTAATGAGCTCCTTGCCTTGCCCCGCCAGAGATGGCGGGGCTTTTTTT
SL1344_4029(SL1344_4029)	ArcZ(ncRNA0002)	+	4311561	4311570	--	--	+	3511914	3511916	3511860	3511861	13	2193.46	3.86e-34	CDS	sRNA	CGATGTTTAAGGTTGCCGGGGATACTACTT	ATTTCCCTGGTGTTGGCGCAGTATTCGCGCACCCCGGTCAAACCGGGGTCATTTTTT
SL1344_4037(SL1344_4037)	Spf(ncRNA0075)	+	4318493	4318673	4318525	4318731	+	4230554	4230612	4230503	4230545	143	19.2972	1.41e-88	CDS	sRNA	ACTATATATTGTGCGCGTTTACGTGAAGCGTCGCCTTGCAATTCAGGAGAGGTAAGATCATGTCTTTAGAAGTGTTTGAGAAACTGGAAGCAAAAGTACAGCAGGCGATTGACACCATCACCCTGTTACAGATGGAAATTGAAGAGCTGAAAGAAAAGAACAACAGCCTGACGCAGGAAGTGCAGTCTGCACAGCATCAGCGTGAAGAACTCGAGCGTGAAAATAATTCTCTGAAGGAA	GTAGGGTACAGAGGTAAGATGTTCTATCTTTCAGACCTTTTACTTCACGTAATCGGATTTGGCTGAATATTTTAGCCGCCCCAGTCAGTTTATGACTGGGGCGTTTTTTA
SL1344_4037(SL1344_4037)	Spf(ncRNA0075)	+	4318494	4318578	4318527	4318530	+	4230613	4230614	4230537	4230542	19	8.70822	5.02e-12	5UTR	sRNA	CTATATATTGTGCGCGTTTACGTGAAGCGTCGCCTTG	ACCTTTTACTTCACGTAATCGGATTTGGCTGAATATTTTAGCCGCCCCAGTCAGTTTATGACTGGGGCGTTTTTTATT
SL1344_4127(SL1344_4127)	InvR(ncRNA0023)	+	4436151	4436168	4436188	4436252	+	3067546	3067587	3067512	3067520	11	885.46	5.67e-27	CDS	sRNA	CAAAATTATTTAACACGTTTAGAGACGAAAATGGCAAAACTGACCTTACAAGAGCAACTGCTACAAGCGGGATTAGTGACCAGCAAAAAAATGGCCAAAGTC	TTGGCCATTTGTCTCTTACGTTGCATTTATCAATCTGCTTTTTGATACAGCAGCACCTCGCTGCTGCTTTTTTTAT
SL1344_4264(SL1344_4264)	ArcZ(ncRNA0002)	+	4593409	4593440	4593455	4593463	+	3511913	3511918	3511860	3511861	41	354.887	1.24e-84	CDS	sRNA	GATTTTTACGTCTGTTATCGGTATGTCGCTGGTACGTAACCAGGGTTTTAAAAAC	ATTTCCCTGGTGTTGGCGCAGTATTCGCGCACCCCGGTCAAACCGGGGTCATTTTTTTT
SL1344_4264(SL1344_4264).aspA(SL1344_4263).IGR	Spf(ncRNA0075)	-	4593116	4593160	4593083	4593096	+	4230572	4230612	4230538	4230546	19	22.8314	6.66e-17	IGR	sRNA	TATTTCACAAAATAATAAATAAGGGGTAAATTCCCACACTTTAAGTGATCCAGATTACGGTAGGAATTCTGAACCAGC	CCTTTTACTTCACGTAATCGGATTTGGCTGAATATTTTAGCCGCCCCAGTCAGTTTATGACTGGGGCGTTTTTTA
SL1344_4288(SL1344_4288)	ArcZ(ncRNA0002)	-	4616747	4616791	4616723	4616726	+	3511913	3511919	3511859	3511865	65	443.416	4.15e-138	5UTR	sRNA	ATAGCACCCTGCGCCAAAAAAAGAATAGCACGGTGACCACAACATCCAATTGATATCAGGGATCAAGAT	GATTTCCCTGGTGTTGGCGCAGTATTCGCGCACCCCGGTCAAACCGGGGTCATTTTTTTTC
SL1344_4288(SL1344_4288)	GcvB(ncRNA0014)	-	4616747	4616789	4616735	4616747	+	3156913	3156985	3156800	3156843	36	39.7553	2.87e-42	5UTR	sRNA	AGCACCCTGCGCCAAAAAAAGAATAGCACGGTGACCACAACATCCAATTGATATC	GTTTTATCGGAATGCGTGTTCTGATGGGCTTTTGGCTTACGGTTGTGATGTTGTGTTGTTGTGTTTGCAATTGGTCTGCGATTCAGACCACGGTAGCGAGACTACCCTTTTTCACTTCCTGTACATTTACCCTGTCTGTCCATAGTGATTAATGTAGCACCGCCATATTGCGGTGCTTTTTTTTGT
SL1344_4328(SL1344_4328)	ArcZ(ncRNA0002)	+	4652673	4652679	4652704	4652706	+	3511915	3511918	3511860	3511862	28	173.404	5.65e-51	CDS	sRNA	TGAAAGAATGGATACCCAACGCCAGGCCTCCCCG	ATTTCCCTGGTGTTGGCGCAGTATTCGCGCACCCCGGTCAAACCGGGGTCATTTTTTTT
SL1344_4339(SL1344_4339)	SL1344_0670(SL1344_0670)	+	4663890	4663918	4663941	4663947	+	750757	750784	750728	750728	12	3117.46	3.36e-38	5UTR	3UTR	ATTAAAATTTGCGCCTTAAAACTGTTGGGCCGATTGTGGCATCGCAAGGGCGTAATAC	AATAAAACCCTGCCTTGCCACCCACGGGCGAATGTTTTCCGCCCGTGGTTTTTTCAG
SL1344_4344(SL1344_4344)	STnc870(ncRNA0205)	+	4672045	4672151	4672122	4672174	+	4292566	4292599	4292538	4292546	24	125.405	2.49e-21	CDS	sRNA	GCTCACGTTACGTTATCGCCTGATGCCTAAGCTATATCTGGAAGCAGTGTCTGGCGTAGATCAGGCACTTGATTTGCTCTATCAGTTTGAGTTTTAGCAATGCGAATATTTGTCTATGGCAGTTTACGAC	CTGTTTTCCTTGCCATAGACACCATCCCTGTCTTCCCCCACATGATGTGGGGGTTTTTTTTA
SL1344_4344(SL1344_4344)	STnc1920(ncRNA0276)	+	4672048	4672126	4672152	--	+	2756639	2756647	2756586	2756587	27	6390.79	5.26e-55	5UTR	sRNA	CACGTTACGTTATCGCCTGATGCCTAAGCTATATCTGGAAGCAGTGTCTGGCGTAGATCAGGCACTTGATTTGCTCTATCAGTTTGAGTTTTAGCAATG	TTTATGCATTTCTGAAACTCCCCCGCAGGTAAGCTCCTTTTCCCTCCTGCGGGAATTTTTTA
SL1344_4388(SL1344_4388)	MgrR(ncRNA0043)	-	4723135	4723162	4723113	4723115	+	1550825	1550845	1550788	1550802	16	160.328	6.45e-29	CDS	sRNA	TTTTACAAACTTAGCTGGACATTCCTCTTTTTTATGCCTGCATATAGCAT	AAACACAAATCTATCCATGCAAGCATTTACCGCTGGTGAACCGGCGGTTTTTTTTTGC
SL1344_4445A(SL1344_4445A).SL1344_4445(SL1344_4445).IGR	ArcZ(ncRNA0002)	-	4789227	4789294	4789196	4789205	+	3511915	3511919	3511860	3511862	21	1574.95	5.28e-53	IGR	sRNA	ACGATAATTAAGTGGCGTGAAATTGACTAACGTCAAATTTATTTCTCCTTTTTTCCTGCTCCCAGCTCCGGCCTGCGTCAACACCTGTTTCTTTGCTTT	ATTTCCCTGGTGTTGGCGCAGTATTCGCGCACCCCGGTCAAACCGGGGTCATTTTTTTTC
SL1344_4448(SL1344_4448)	ArcZ(ncRNA0002)	-	4793173	4793212	4793141	4793142	+	3511913	3511917	3511860	3511862	22	197.996	1.72e-41	CDS	sRNA	GATTTTTCTCACCGGGGCGGCGACGCTGTCGTTGAGCTACATCCCGATGATGAGCTGGGTGGCGGTGTCGCC	ATTTCCCTGGTGTTGGCGCAGTATTCGCGCACCCCGGTCAAACCGGGGTCATTTTTTT
SL1344_4453(SL1344_4453).AS	ArcZ(ncRNA0002)	+	4796969	4796983	4797007	4797007	+	3511914	3511917	3511860	3511861	10	160.687	7.52e-19	Antisense	sRNA	ATTTTTTCTTTTTTGTTAAATATGCCAGGGATGATAATC	ATTTCCCTGGTGTTGGCGCAGTATTCGCGCACCCCGGTCAAACCGGGGTCATTTTTTT
SL1344_4482(SL1344_4482)	OxyS(ncRNA0050)	-	4830752	4830803	4830730	4830731	-	4364304	4364312	4364350	4364356	16	953.616	4.08e-42	5UTR	sRNA	CTGTTAACGTAAAAACAACAACACCTCGCTTTAGGCGACCTTTTCTCATACGTTATTTTCATGTTGGCGCCCGA	GAAATAACTAAAGCCAACGTGAACTTTTGCGGACCTCTGGTCCGCTTTTTTTT
SL1344_4511(SL1344_4511)	ArcZ(ncRNA0002)	-	4862558	4862572	4862537	4862539	+	3511915	3511917	3511860	3511868	14	944.887	4.66e-34	CDS	sRNA	TTTTAAAACTGAGCTTAATTATGCACCAGGTTATCT	ATTTCCCTGGTGTTGGCGCAGTATTCGCGCACCCCGGTCAAACCGGGGTCATTTTTTT
SL1344_rRNA0002(SL1344_rRNA0002).AS	Spf(ncRNA0075)	-	293678	293701	293655	293655	+	4230605	4230612	4230558	4230578	31	43.4601	6.08e-32	Antisense	sRNA	ACCTTCGTGCTCCTCCGTTACTCTTTAGGAGGAGACCGCCCCAGTCA	GATTTGGCTGAATATTTTAGCCGCCCCAGTCAGTTTATGACTGGGGCGTTTTTTA
SL1344_rRNA0002(SL1344_rRNA0002).SL1344_rRNA0003(SL1344_rRNA0003).IGR	StyR-44d(ncRNA0423)	+	294400	294472	294504	294504	+	4123236	4123291	--	--	15	290.874	4.13e-32	IGR	sRNA	GGCGGCAAACGCAGCGACGGAAGGAGCATACAGAAGTATGTGACTGACGCTCGCAAGAGCAGCCAACGCCGTATCAGTGTAAAAGACACAGGACGGAGCACAAAG	CTCTTTAAAAATCTGGATCAAGCTGAAAATTGAAACACAGAACAACGAAAGTTGTTCGTGAGTCTCTCAAATTTTC
SL1344_rRNA0002(SL1344_rRNA0002).SL1344_rRNA0003(SL1344_rRNA0003).IGR	StyR-44f(ncRNA0425)	+	294404	294474	294512	294512	+	4374520	4374576	4374502	4374502	13	245.598	4.4e-27	IGR	sRNA	GCAAACGCAGCGACGGAAGGAGCATACAGAAGTATGTGACTGACGCTCGCAAGAGCAGCCAACGCCGTATCAGTGTAAAAGACACAGGACGGAGCACAAAGAATTTGCC	TTTGCTCTTTAAAAATCTGGATCAAGCTGAAAATTGAAACACAGAACAACGAAAGTTGTTCGTGAGTCTCTCAAA
SL1344_rRNA0009(SL1344_rRNA0009).AS	Spf(ncRNA0075)	+	3589217	3589240	--	--	+	4230602	4230612	4230576	4230578	25	21.7541	1.92e-21	Antisense	sRNA	CCTTCGTGCTCCTCCGTTACTCTTTAGGAGGAGACCGCCCCAGT	AGCCGCCCCAGTCAGTTTATGACTGGGGCGTTTTTTA
SL1344_rRNA0012(SL1344_rRNA0012).AS	Spf(ncRNA0075)	-	4125688	4125710	4125664	4125664	+	4230606	4230612	4230528	4230578	28	50.4697	5.84e-30	Antisense	sRNA	ACCTTCGTGCTCCTCCGTTACTCTTTAGGAGGAGACCGCCCCAGTCA	ATCTTTCAGACCTTTTACTTCACGTAATCGGATTTGGCTGAATATTTTAGCCGCCCCAGTCAGTTTATGACTGGGGCGTTTTTTA
SL1344_rRNA0012(SL1344_rRNA0012).SL1344_rRNA0013(SL1344_rRNA0013).IGR	StyR-44c(ncRNA0422)	+	4126397	4126487	--	--	-	3591629	3591686	3591715	3591715	12	52.9045	3.28e-17	IGR	sRNA	ACGCTGAGACAAGGCGGCAAACGCAGCGACGGAAGGAGCATACAGAAGTATGTGACTGACGCTCGCAAGAGCAGCCAACGCCGTATCAGTGTAAAAGACACAGGACGGAGC	ATTTGCTCTTTAAAAATCTGGATCAAGCTGAAAATTGAAACACAGAACAACGAAAGTTGTTCGTGAGTCTCTCAAATTTTCGCAACA
SL1344_rRNA0012(SL1344_rRNA0012).SL1344_rRNA0013(SL1344_rRNA0013).IGR	StyR-44g(ncRNA0426)	+	4126411	4126480	4126521	4126521	+	4417814	4417861	4417781	4417785	10	120.217	4.28e-18	IGR	sRNA	CGGCAAACGCAGCGACGGAAGGAGCATACAGAAGTATGTGACTGACGCTCGCAAGAGCAGCCAACGCCGTATCAGTGTAAAAGACACAGGACGGAGCACAAAGAATTTGCC	TTTGCTCTTTAAAAATCTGGATCAAGCTGAAAATTGAAACACAGAACAACGAAAGTTGTTCGTGAGTCTCTCAAATTTTCG
SL1344_Rrna0015(SL1344_rRNA0015).AS	Spf(ncRNA0075)	-	4222012	4222034	--	--	+	4230606	4230612	4230576	4230578	40	72.1	3.36e-45	Antisense	sRNA	ACCTTCGTGCTCCTCCGTTACTCTTTAGGAGGAGACCGCCCCA	AGCCGCCCCAGTCAGTTTATGACTGGGGCGTTTTTTA
SL1344_rRNA0018(SL1344_rRNA0018).AS	Spf(ncRNA0075)	-	4376976	4376998	4376952	4376952	+	4230601	4230612	4230576	4230578	28	32.1171	7.27e-27	Antisense	sRNA	ACCTTCGTGCTCCTCCGTTACTCTTTAGGAGGAGACCGCCCCAGTCA	AGCCGCCCCAGTCAGTTTATGACTGGGGCGTTTTTTA
SL1344_rRNA0021(SL1344_rRNA0021）.AS	Spf(ncRNA0075)	-	4420259	4420272	--	--	+	4230606	4230612	4230558	4230578	33	55.5168	9.34e-36	Antisense	sRNA	CGTGCTCCTCCGTTACTCTTTAGGAGGAGACCGC	GATTTGGCTGAATATTTTAGCCGCCCCAGTCAGTTTATGACTGGGGCGTTTTTTA
slt(SL1344_4509)	MgrR(ncRNA0043)	+	4859593	4859604	4859625	4859632	+	1550835	1550845	1550786	1550802	57	837.998	3e-128	CDS	sRNA	ATAACAATTGAGGAAGTGCTTGTGGATAGAGCCAAACCAT	CAAAACACAAATCTATCCATGCAAGCATTTACCGCTGGTGAACCGGCGGTTTTTTTTTGC
slyB(SL1344_1377)	STnc870(ncRNA0205)	-	1477713	1477787	1477681	1477691	+	4292579	4292600	4292550	4292561	92	2558.43	2.68e-244	5UTR	sRNA	CATTCTTTCGGCAGAAGATATGACCTTAACTGCATAAATGCCATATAATTTAGCTATAGGGATGCTGAAATAGCGTTTCGTGAAGAACAGGAGATGGGTAAATGATT	CCATAGACACCATCCCTGTCTTCCCCCACATGATGTGGGGGTTTTTTTTAT
smpB(SL1344_2660)	STnc2180(ncRNA0291)	+	2837602	2837648	2837676	2837678	-	1992862	1992864	1992902	1992905	12	660.599	3.48e-30	5UTR	sRNA	ATTTTTGCACCTCATCAGGACGTAATGGGGTGTTTTCGATATCAGATTACCTATGAATTCACGACACTTATGACGAA	GCAATAAGCAGTGTCGTGAAACCACCTACGGGTGGTTTTTTTGT
solA(SL1344_1097)	ArcZ(ncRNA0002)	-	1203644	1203669	1203599	1203605	+	3511914	3511917	3511860	3511862	17	53.6169	1.35e-23	CDS	sRNA	ACCTTATTATTATCGGCAGCGGTTCGGTTGGCGCCGCCGCTGGTTATTACGCCACCCGCGCCGGGCTAAAG	ATTTCCCTGGTGTTGGCGCAGTATTCGCGCACCCCGGTCAAACCGGGGTCATTTTTTT
sRNA2(ncRNA0108	OxyS(ncRNA0050)	+	2311294	2311303	2311332	2311334	-	4364304	4364312	4364350	4364356	10	281.391	1e-21	sRNA	sRNA	TGCAGGTAATTAGTCTCATCACGTTTGGCATTTTTATAACG	GAAATAACTAAAGCCAACGTGAACTTTTGCGGACCTCTGGTCCGCTTTTTTTT
sRNA2(ncRNA0108)	OxyS(ncRNA0050)	+	2311207	2311287	2311327	2311334	-	4364303	4364312	4364350	4364356	20	166.566	1.75e-37	sRNA	sRNA	GTTTTGCCTCGCCAGATAATTATTCTCATTGCGAATAAATTTGTGCGTTCCGCCACAGATTTGTGCACAAAGAATTGTCTCAAGCTGTGCAGGTAATTAGTCTCATCACGTTTGGCATTTTTATAACG	GAAATAACTAAAGCCAACGTGAACTTTTGCGGACCTCTGGTCCGCTTTTTTTTT
sRNA2(ncRNA0108)	ArcZ(ncRNA0002)	+	2311300	2311369	2311369	2311369	+	3511913	3511918	3511859	3511861	10	18.4394	4.24e-10	sRNA	sRNA	TAATTAGTCTCATCACGTTTGGCATTTTTATAACGATATTTATCGTTAAGGACTTCAAGGGAAAACAAAC	GATTTCCCTGGTGTTGGCGCAGTATTCGCGCACCCCGGTCAAACCGGGGTCATTTTTTTT
sRNA5(ncRNA0109)	ArcZ(ncRNA0002)	+	4617722	4617783	4617831	4617831	+	3511914	3511917	3511860	3511861	13	15.2058	1.09e-11	sRNA	sRNA	TTTCAAAACGTTAGTTTTATTGACTATTCCTTTTTTCCCTCTTGAATCGCAATGTGTTTTTATTTTTATACACAGCCTGTGAATAATTCAGGCATCGCGCACCAGCCCTT	ATTTCCCTGGTGTTGGCGCAGTATTCGCGCACCCCGGTCAAACCGGGGTCATTTTTTT
ssaT(SL1344_1355)	ArcZ(ncRNA0002)	+	1456970	1456972	--	--	+	3511914	3511917	3511861	3511861	13	4386.92	1.71e-35	CDS	sRNA	ATATTTACCACCAGGGCGTACTT	TTTCCCTGGTGTTGGCGCAGTATTCGCGCACCCCGGTCAAACCGGGGTCATTTTTTT
ssaU(SL1344_1356).AS	ChiX(ncRNA0003)	-	1458264	1458280	1458227	1458248	+	555543	555574	555514	555521	49	28.0127	2.02e-50	Antisense	sRNA	AACGGGTTCAAATAACGTTTCAGGAATTTTATCTCCGCGTTCCACTTCAAAAAA	ATAATAATAACGATGAAATTCCTCTTTGACGGGCCAATAGCGATATTGGCCATTTTTTTAT
sseD(SL1344_1335).AS	ArcZ(ncRNA0002)	-	1443728	1443779	1443671	1443712	+	3511913	3511918	3511859	3511862	36	56.7844	4.72e-49	Antisense	sRNA	GGCCCCATTTTGTTGCAGGTCGGCAATCGCTTTATCTTGATCACTTTGACGTTGCGCTACACCAGCCCCCAGGCCCATGACGCCCCCAGCTGTGTGGCCTACGGCTTGA	GATTTCCCTGGTGTTGGCGCAGTATTCGCGCACCCCGGTCAAACCGGGGTCATTTTTTTT
sseD(SL1344_1335).AS	STnc440(ncRNA0162)	-	1443740	1443779	1443710	1443713	+	4580526	4580564	4580493	4580504	15	313.96	1.5e-32	Antisense	sRNA	GGCCCCATTTTGTTGCAGGTCGGCAATCGCTTTATCTTGATCACTTTGACGTTGCGCTACACCAGCCCCC	TTACTTTGTGGTGTAGCGTAACGGTAATTGTCCTCCTCATATTTGCGGCAGCGTAGTCTGCCGCTTTTTTTT
SsrS(ncRNA0087).SL1344_3037(SL1344_3037).IGR	ArcZ(ncRNA0002)	+	3243051	3243085	3243103	3243112	+	3511913	3511918	3511860	3511862	27	22.2263	8.3e-27	IGR	sRNA	CGACAAGAAATCCGCCGGATGATTCGGCAACGTCGCCGTGCGCTAACGCCAGAGCAGCAACG	ATTTCCCTGGTGTTGGCGCAGTATTCGCGCACCCCGGTCAAACCGGGGTCATTTTTTTT
STnc1170(ncRNA0226)	ArcZ(ncRNA0002)	-	3312447	3312463	3312424	3312424	+	3511915	3511918	3511862	3511862	11	7.42383e+06	7.44e-32	sRNA	sRNA	TTGAATAACGACGCTGTGATACCGGCACCAGGGATACTTT	TTCCCTGGTGTTGGCGCAGTATTCGCGCACCCCGGTCAAACCGGGGTCATTTTTTTT
STnc1390(ncRNA0242)	ArcZ(ncRNA0002)	+	2767701	2767741	2767757	2767762	+	3511913	3511918	3511861	3511866	26	3.92246	1.03e-08	sRNA	sRNA	CTGTGAATTGATCCAGTTAATTCCACCAGAAAGCCGTTGGTGTTCGAGCACCGCGGCTTTCG	TTTCCCTGGTGTTGGCGCAGTATTCGCGCACCCCGGTCAAACCGGGGTCATTTTTTTT
STnc1660(ncRNA0262)	ArcZ(ncRNA0002)	-	3489171	3489174	3489131	3489135	+	3511916	3511919	--	--	14	17.4332	2.99e-13	sRNA	sRNA	GATTTTACGCTCTTTAGTTGGGCGATACAGCACCAGCGTTTTAC	GTCAAACCGGGGTCATTTTTTTTC
STnc4240(ncRNA0376)	MgrR(ncRNA0043)	+	3037189	3037251	--	--	+	1550841	1550846	1550800	1550804	16	26.6203	1.26e-17	sRNA	sRNA	GCTAAGTAAAAACCGGTGATTCGGCGCCTTATTGCAGACAGATAAACTTGTTCCCTGATGCATTGCCAAAAATGCTTGCGCCC	ATCCATGCAAGCATTTACCGCTGGTGAACCGGCGGTTTTTTTTTGCC
STnc480(ncRNA0167)	MgrR(ncRNA0043)	-	587377	587393	587338	587341	+	1550837	1550843	1550786	1550799	16	8.2314	3.63e-10	sRNA	sRNA	TATTTTTAATTTAGCTATGTTGGATTTTGCCACGGTGAGAACCGTGGCTTTTTTTA	CAAAACACAAATCTATCCATGCAAGCATTTACCGCTGGTGAACCGGCGGTTTTTTTTT
STnc510(ncRNA0176)	MgrR(ncRNA0043)	+	1288752	1288785	1288805	1288821	+	1550836	1550844	1550794	1550794	13	955.262	1.09e-30	sRNA	sRNA	GTTTCTTAATGTGGTTGTGAGATTTTCTCTTTAAATATCAAAATGTTGCATGGGTGATTTGTTGTTCTAT	AAATCTATCCATGCAAGCATTTACCGCTGGTGAACCGGCGGTTTTTTTTTG
STnc520(ncRNA0177)	STnc1010(ncRNA0214)	-	1290634	1290675	1290588	1290590	+	41705	41709	41635	41641	18	41.1465	3.86e-23	sRNA	sRNA	GCGGCTGGTAACCATTCATATTCGCACTATTGAACGATCACCGGCCAACCGCGCCAGGGTCTTGCATACGCTCTGGCGCGGTTAAATC	TAAAAAATTAAGTATGCCACTTAGGGCGATGCCCACCTGATCCGGTCACTCTGTGCCGGATCAGGTTCTTTTATT
STnc730(ncRNA0193)	STnc870(ncRNA0205)	-	1462379	1462412	1462351	1462365	+	4292566	4292603	4292541	4292543	155	155.067	1.02e-269	sRNA	sRNA	AACGGGAACCGGAGCGTTCCCGATTCACCATGGATGGCCTTTTCGGCAAGGGCTCCTCCCTT	TTTTCCTTGCCATAGACACCATCCCTGTCTTCCCCCACATGATGTGGGGGTTTTTTTTATCTC
STnc730(ncRNA0193)	STnc2110(ncRNA0286)	-	1462416	1462446	1462352	1462384	-	4030644	4030671	4030684	4030703	1224	703.275	0	sRNA	sRNA	CCGGTTGTTTATATTACGATAATTATTAGGCATTAACGGGAACCGGAGCGTTCCCGATTCACCATGGATGGCCTTTTCGGCAAGGGCTCCTCCCT	CATTAAATAGCTAATGAGCTCCTTGCCTTGCCCCGCCAGAGATGGCGGGGCTTTTTTTAT
StyR-215d(ncRNA0454)	STnc2180(ncRNA0291)	+	4121215	4121283	4121306	4121308	-	1992862	1992885	1992903	1992916	32	237.313	7.05e-64	sRNA	sRNA	GCGAAAATAAACGCTTGACTCTGAAGCGGGAAAGCGTAATATGCACACCCCGCGCCGCTGAGAAAAAGCGAAGCGGCACTGCTCTTTAACAATT	GAATAATCAAAGCAATAAGCAGTGTCGTGAAACCACCTACGGGTGGTTTTTTTGT
StyR-215e(ncRNA0455)	STnc2180(ncRNA0291)	+	4217400	4217445	--	--	-	1992863	1992885	1992903	1992916	16	99.6929	8.73e-27	sRNA	sRNA	CTGAAGCGGGAAAGCGTAATATGCACACCCCGCGCCGCTGAGAAAAAGCGAAGCGGCACTGCTCTT	GAATAATCAAAGCAATAAGCAGTGTCGTGAAACCACCTACGGGTGGTTTTTTTG
StyR-215f(ncRNA0456)	STnc2180(ncRNA0291)	+	4372395	4372418	4372435	4372435	-	1992863	1992885	1992903	1992916	17	39.3883	1.25e-21	sRNA	sRNA	GCGCCGCTGAGAAAAAGCGAAGCGGCACTGCTCTTTAACAA	GAATAATCAAAGCAATAAGCAGTGTCGTGAAACCACCTACGGGTGGTTTTTTTG
StyR-29(ncRNA0419)	CyaR(ncRNA0009)	-	52558	52583	52529	52539	+	2228924	2228931	2228863	2228867	21	23.0861	1.37e-21	sRNA	sRNA	CCTTTGAATTGTCCATATAGAACACATTTGGGAGTTGGACCTTGGCTAATATCAA	ATAAATGCTAGCTGTACCAGGAACCACCTCCTTGGCCTGCGTAATCTCCCTTACGCAGGCTTATTTTTT
StyR-29(ncRNA0419)	STnc870(ncRNA0205)	-	52559	52598	52529	52534	+	4292577	4292600	4292541	4292542	10	8.9405	3.2e-07	sRNA	sRNA	GGGCATATTCCTCGGCCTTTGAATTGTCCATATAGAACACATTTGGGAGTTGGACCTTGGCTAATATCAA	TTTTCCTTGCCATAGACACCATCCCTGTCTTCCCCCACATGATGTGGGGGTTTTTTTTAT
sucA(SL1344_0718)	STnc800(ncRNA0200)	+	800903	800977	800994	801002	-	4236849	4236871	4236893	4236901	74	9072.47	2.86e-255	5UTR	sRNA	AAGGTTCCTTAGCGGACGCAGATGACACGACAGTCCGCAACAAGTGAACCCCGGCACGCATACAGCGTATGCGTGGTTAGTATCCACGGCGAAATACTCG	GTTTTTGAGTTGCCGTGGAAACTTTCAGCCCATCCCAGGATGGGCTTTTTTCT
sucB(SL1344_0719).sucC(SL1344_0720).IGR	Spf(ncRNA0075)	+	805290	805299	805325	805326	+	4230559	4230612	4230516	4230536	25	3.80041	9.4e-08	IGR	sRNA	ATAACGATTACCTGAAGGATGGACAGAACACATGAAC	GTAAGATGTTCTATCTTTCAGACCTTTTACTTCACGTAATCGGATTTGGCTGAATATTTTAGCCGCCCCAGTCAGTTTATGACTGGGGCGTTTTTTA
sufI(SL1344_3146)	STnc2110(ncRNA0286)	-	3356618	3356691	3356576	3356589	-	4030646	4030653	4030691	4030699	81	1508.38	2.32e-216	5UTR	sRNA	GAGGTTGCGGAACGTGAAGCGACCGGTAAGGTTTAAGCAGCCTTACTCTGTTATTGTAGAAATCATTTTTTCAGGCACAACTCTTTAGCCTGTTTTACATGGAGCTTATATGTCAT	AAATAGCTAATGAGCTCCTTGCCTTGCCCCGCCAGAGATGGCGGGGCTTTTTTT
sugE(SL1344_4275)	ArcZ(ncRNA0002)	+	4601999	4602038	4602058	4602081	+	3511914	3511917	3511861	3511863	17	56.5223	5.81e-24	5UTR	sRNA	TTTTCATCCGTATACGTTACAGGACGACCTGTAAACGCTATTCTCACCGGGGACGGCCCCATTAATTATCTGGAGCCTGCTAT	TTTCCCTGGTGTTGGCGCAGTATTCGCGCACCCCGGTCAAACCGGGGTCATTTTTTT
suhB(SL1344_2508).SL1344_2509(SL1344_2509).IGR	MgrR(ncRNA0043)	+	2682993	2683027	2683049	2683051	+	1550836	1550844	1550790	1550796	10	29.3919	5.89e-12	IGR	sRNA	TTTCAGGCGTTTTTCCTAAACACAGCCTCATCGCTTTACTTGCCTGCATGTTTTTGTAC	ACACAAATCTATCCATGCAAGCATTTACCGCTGGTGAACCGGCGGTTTTTTTTTG
thrL(SL1344_0001)	GcvB(ncRNA0014)	+	146	170	182	198	+	3156915	3156984	3156808	3156914	10	7.89621	1.18e-06	5UTR	sRNA	AATACAAGACAGACAAATAAAAATGACAGAGTACACAACATCCATGAACCGCA	GGAATGCGTGTTCTGATGGGCTTTTGGCTTACGGTTGTGATGTTGTGTTGTTGTGTTTGCAATTGGTCTGCGATTCAGACCACGGTAGCGAGACTACCCTTTTTCACTTCCTGTACATTTACCCTGTCTGTCCATAGTGATTAATGTAGCACCGCCATATTGCGGTGCTTTTTTTTG
tktA(SL1344_3052)	Spf(ncRNA0075)	-	3259113	3259186	3258976	3259110	+	4230561	4230614	4230502	4230560	539	6.03535	2.2e-144	5UTR	sRNA	GGCAAATTTTCCGGCGTAGCCCAAAACGCGCTGTCGTCAAGTCGTTACGGGCATGGCCTTTCAACATCCGATCTGGAGTCAAAATGTCCTCACGTAAAGAGCTTGCCAATGCTATTCGTGCGCTGAGCATGGACGCAGTACAGAAAGCCAAGTCCGGTCACCCGGGTGCCCCGATGGGTATGGCTGACATTGCCGAAGTCCTGTGGCGTGA	CGTAGGGTACAGAGGTAAGATGTTCTATCTTTCAGACCTTTTACTTCACGTAATCGGATTTGGCTGAATATTTTAGCCGCCCCAGTCAGTTTATGACTGGGGCGTTTTTTATT
tktA(SL1344_3052)	GcvB(ncRNA0014)	-	3259122	3259181	3259088	3259110	+	3156850	3156912	3156808	3156822	12	7.27506	1.91e-07	5UTR	sRNA	ATTTTCCGGCGTAGCCCAAAACGCGCTGTCGTCAAGTCGTTACGGGCATGGCCTTTCAACATCCGATCTGGAGTCAAAATGTCCTCACGTAAAG	GGAATGCGTGTTCTGATGGGCTTTTGGCTTACGGTTGTGATGTTGTGTTGTTGTGTTTGCAATTGGTCTGCGATTCAGACCACGGTAGCGAGACTACCCTTTTTC
tolB(SL1344_0730)	STnc870(ncRNA0205)	+	816549	816551	--	--	+	4292591	4292600	4292539	4292547	12	14.6883	9.49e-11	CDS	sRNA	CTCTTCTCAGGGGATGGGATCTG	TGTTTTCCTTGCCATAGACACCATCCCTGTCTTCCCCCACATGATGTGGGGGTTTTTTTTAT
tolB(SL1344_0730).pal(SL1344_0731).IGR	STnc1920(ncRNA0276)	+	816673	816681	816711	816712	+	2756628	2756648	2756579	2756584	14	1012.25	1.41e-37	IGR	sRNA	TTAATTGATTACTAAAGGAATTAAAGAAATGCAACTGAAC	TGTCATGTTTATGCATTTCTGAAACTCCCCCGCAGGTAAGCTCCTTTTCCCTCCTGCGGGAATTTTTTAT
tpx(SL1344_1612)	ArcZ(ncRNA0002)	+	1732404	1732447	1732468	1732468	+	3511915	3511917	3511861	3511861	11	50.5021	1.64e-15	5UTR	sRNA	CGACGTTAACTATAAGTAAATAGGAACATAATTATGTCACAGACTGTACATTTCCAGGGTAACCC	TTTCCCTGGTGTTGGCGCAGTATTCGCGCACCCCGGTCAAACCGGGGTCATTTTTTT
treR(SL1344_4386)	ArcZ(ncRNA0002)	-	4719914	4719942	4719885	4719895	+	3511913	3511919	3511860	3511861	27	2025.09	3.64e-69	5UTR	sRNA	GCTTGAGTAAAGTTACTCTTTTTATCACCATCAGCGTCACGCCACGGGAAAACAGGAT	ATTTCCCTGGTGTTGGCGCAGTATTCGCGCACCCCGGTCAAACCGGGGTCATTTTTTTTC
trkH(SL1344_3939)	SdsR(ncRNA0070)	+	4215022	4215067	4215098	4215101	-	1925619	1925647	1925692	1925693	16	258.061	7.87e-33	5UTR	sRNA	ATTATTAGGACAGTTTGCCGGGAAGATCGTTTCCAGCGATTATCAGGCGTCTGTTCGGCTCAGGGTGGCGCTTCCTTTTG	ACTTTTAGCGCACGGCTCTCTCCCAAGAGCCATTTCCCTGGACCGAATACAGGAATCGTATTCGGTCTCTTTTTA
trmU(SL1344_1172)	ArcZ(ncRNA0002)	-	1278913	1278926	1278882	1278892	+	3511913	3511917	3511860	3511862	31	130.794	7.11e-53	CDS	sRNA	GACTTTTTAGGGCGCTATCTGCCTGCGCAGCCGGGGAAAATCATT	ATTTCCCTGGTGTTGGCGCAGTATTCGCGCACCCCGGTCAAACCGGGGTCATTTTTTT
trpS(SL1344_3448)	ArcZ(ncRNA0002)	-	3658793	3658872	3658768	3658775	+	3511913	3511919	3511860	3511863	65	198.051	2.14e-81	5UTR	sRNA	GGCGAAGCGATCGCTCTTAGCGAGCCGGACGTCATTTATGACAGTTTTAACGATCTTTTGCCCGCACTTGGGCTTCCGCATAGCGATAACCAGGAAATAAAAAAT	ATTTCCCTGGTGTTGGCGCAGTATTCGCGCACCCCGGTCAAACCGGGGTCATTTTTTTTC
truA(SL1344_2337)	ArcZ(ncRNA0002)	-	2478313	2478374	2478290	2478291	+	3511913	3511917	3511860	3511861	10	18.9573	3.27e-10	CDS	sRNA	AATATTGTCGGCAGCCTGCTGGAAGTAGGCGCTCACAACCAGCCGGAGAGCTGGATCGCAGAGCTGTTAGCGGCCAGGGACAGAA	ATTTCCCTGGTGTTGGCGCAGTATTCGCGCACCCCGGTCAAACCGGGGTCATTTTTTT
trxA(SL1344_3875)	ArcZ(ncRNA0002)	+	4146295	4146336	4146359	4146366	+	3511914	3511919	3511860	3511861	18	73.6311	3.2e-27	5UTR	sRNA	TCAACCTTTGTTGGCGAAGTTAACATCAGCACCTCGTTGGTTAATGCTACACCAACACGCCAGGCTTATTCC	ATTTCCCTGGTGTTGGCGCAGTATTCGCGCACCCCGGTCAAACCGGGGTCATTTTTTTTC
tsx(SL1344_0407)	STnc1010(ncRNA0214)	-	467901	467964	467875	467894	+	41657	41712	41627	41649	2893	20729.6	0	5UTR	sRNA	CCGCAGAAACACGAAATATTTAGAAACGCAAATTGCGTTCTTTTCACTCCCGCAAGGGATTTCAAACAGTGGCATACATATGAAAAAAAC	AATAATTATAAAAAATTAAGTATGCCACTTAGGGCGATGCCCACCTGATCCGGTCACTCTGTGCCGGATCAGGTTCTTTTATTTCA
tsx(SL1344_0407)	RybB(ncRNA0061)	-	467915	467955	467884	467901	-	941811	941878	941883	941896	54	8.72707	7.95e-32	5UTR	sRNA	CACGAAATATTTAGAAACGCAAATTGCGTTCTTTTCACTCCCGCAAGGGATTTCAAACAGTGGCATACATAT	TATTGCCACTGCTTTTCTTTGATGTCCCCATTTTGTGGAGCCCATCAACCCCGCCATTTCGGTTCAAGGTTGGTGGGTTTTTTGTT
tsx(SL1344_0407)	STnc970(ncRNA0213)	-	467918	467963	467886	467892	-	889558	889582	889611	889625	60	247.502	3.08e-119	5UTR	sRNA	CGCAGAAACACGAAATATTTAGAAACGCAAATTGCGTTCTTTTCACTCCCGCAAGGGATTTCAAACAGTGGCATACAT	GCTCCAACCCTCATTAACCCTGTTTGTTACCCTTATTTGCCCGTCCGTCACTGGACGGGCTTTTTTTA
tsx(SL1344_0407)	STnc2000(ncRNA0278)	-	467926	467963	467880	467880	-	1204288	1204294	1204320	1204336	11	42.8149	6.6e-15	5UTR	sRNA	CGCAGAAACACGAAATATTTAGAAACGCAAATTGCGTTCTTTTCACTCCCGCAAGGGATTTCAAACAGTGGCATACATATGAAA	AAAAATGATATGCAGTGATGTATGTTTGCCGGGTCGCCCCGGCTTTTTT
udp(SL1344_3922)	Spf(ncRNA0075)	+	4196308	4196387	4196397	4196625	+	4230566	4230615	4230497	4230554	649	13.0971	0	CDS	sRNA	TTTTACGTCATAGTGATGGCTGTCACGAAAATATCTTTATGCCTTAGGTAAAGTGTCTCTTTGCTTCTTCTGACAAACCCGATTCACAGAGGAGTTTTATATGTCCAAGTCTGATGTTTTTCATCTCGGCCTCACCAAAAACGATTTACAAGGGGCCCAGCTCGCCATCGTCCCTGGCGATCCTGAGCGTGTGGAAAAGATCGCCGCGCTGATGGATAAGCCGGTTAAGCTGGCATCTCACCGCGAATTCACCTCCTGGCGCGCTGAGCTGGATGGCAAAGCAGTTATCGTTTGCTCTACCGGTATCGGTGGCCCGTC	ATTCACGTAGGGTACAGAGGTAAGATGTTCTATCTTTCAGACCTTTTACTTCACGTAATCGGATTTGGCTGAATATTTTAGCCGCCCCAGTCAGTTTATGACTGGGGCGTTTTTTATTG
ugpA(SL1344_3522).AS	STnc1680(ncRNA0265)	+	3747585	3747585	3747615	3747619	+	2897093	2897100	--	--	11	19.2916	3.38e-11	Antisense	sRNA	AGCGCGAGCGGAACACCGGACGGGATGATGACATG	TATTTCCACCCCCGTCTGGGCTACCACC
ugpA(SL1344_3522).AS	MicA(ncRNA0044)	+	3747585	3747586	3747615	3747620	+	2989463	2989509	2989438	2989444	65	138.308	1.13e-111	Antisense	sRNA	AGCGCGAGCGGAACACCGGACGGGATGATGACATGA	CATTTGTTATCATCATCCCTGTTTTCAGCGATGAAATTTTGGCCACTCCGTGAGTGGCCTTTTTCTTTTGGG
ushA(SL1344_0487)	ArcZ(ncRNA0002)	+	553589	553592	--	--	+	3511913	3511919	3511860	3511865	25	992.667	4.45e-60	CDS	sRNA	ATTTTTACACGCCAGGATATAAAA	ATTTCCCTGGTGTTGGCGCAGTATTCGCGCACCCCGGTCAAACCGGGGTCATTTTTTTTC
uspA(SL1344_3556)	STnc870(ncRNA0205)	+	3782144	3782168	3782186	3782191	+	4292565	4292600	4292541	4292542	167	3463.14	0	5UTR	sRNA	GGTCATCGACAACTTATGGAAGGAGTAACACTATGGCTTATAAACACA	TTTTCCTTGCCATAGACACCATCCCTGTCTTCCCCCACATGATGTGGGGGTTTTTTTTAT
yafK(SL1344_0308)	MgrR(ncRNA0043)	-	356213	356301	356190	356190	+	1550836	1550844	1550787	1550796	12	14.8196	9.52e-11	3UTR	sRNA	TCCGAGGCAAAATAACGCCCATTCGCCTGGCATAATCTTTTGCCAGGTTTCATTCCCCGTTAGCGGCTGGGTAGCAATCACGGTAACCACGTCATTTGGCGTGGTCTGTGAA	AAAACACAAATCTATCCATGCAAGCATTTACCGCTGGTGAACCGGCGGTTTTTTTTTG
yaiW(SL1344_0372)	ArcZ(ncRNA0002)	+	431267	431269	431319	431325	+	3511916	3511917	3511860	3511862	19	132.209	4.32e-33	CDS	sRNA	GTTTAAGAGCCAGGGGCTGGCGCCGACGGTAGAAAATATCTGTTCGGTGCTGGCTGTCG	ATTTCCCTGGTGTTGGCGCAGTATTCGCGCACCCCGGTCAAACCGGGGTCATTTTTTT
ybaV(SL1344_0447).SL1344_0448(SL1344_0448).IGR	SdsR(ncRNA0070)	+	510618	510632	510658	510660	-	1925620	1925647	1925690	1925696	19	6068.22	5.78e-57	IGR	sRNA	TTTACTTATAACAACAACGTAAGGTTATTGCGCTATGCAAACA	CCAACTTTTAGCGCACGGCTCTCTCCCAAGAGCCATTTCCCTGGACCGAATACAGGAATCGTATTCGGTCTCTTTTT
ybeJ(SL1344_0654).lnt(SL1344_0655).IGR	ArcZ(ncRNA0002)	+	729366	729376	729400	729400	+	3511915	3511917	3511859	3511863	26	1755.06	6.64e-66	IGR	sRNA	TTGTTTATTTTTGCGAAGTGCGCCGCACCGTTCAG	GATTTCCCTGGTGTTGGCGCAGTATTCGCGCACCCCGGTCAAACCGGGGTCATTTTTTT
ybfM(SL1344_0669)	ChiX(ncRNA0003)	+	748804	748920	748915	748946	+	555541	555577	555514	555539	2090	173.226	0	5UTR	sRNA	GGTTACAGAAAGAGATTGATAATTCGCATCGCGAAAAATAGTCTATTTAACGTAGTAAATGAGGTTTCTCAGCGCTACTTTTTATTTTTTCGCTGTTCGCTTTTGTCGGCAGCAATTTATACGTCAAAGAGGATTAACTTATG	ATAATAATAACGATGAAATTCCTCTTTGACGGGCCAATAGCGATATTGGCCATTTTTTTATTTC
ybiT(SL1344_0813)	MgrR(ncRNA0043)	+	904265	904281	904303	904331	+	1550814	1550843	--	--	13	34.5274	5.74e-16	CDS	sRNA	GGTTTGTCACATCTTTTTTCAGGATAAGCTTGTGTTAGTTTCCAGCAACGTTACCATGCAGTTCGGC	AAATCTATCCATGCAAGCATTTACCGCTGGTGAACCGGCGGTTTTTTTTT
ybjU(SL1344_0873)	ArcZ(ncRNA0002)	-	966627	966634	--	--	+	3511913	3511918	3511860	3511861	11	1237.3	9.14e-28	5UTR	sRNA	ACATCACCTTTTAAAATCCAGGGATGTG	ATTTCCCTGGTGTTGGCGCAGTATTCGCGCACCCCGGTCAAACCGGGGTCATTTTTTTT
ybjY(SL1344_0880)	ArcZ(ncRNA0002)	+	975102	975144	975171	975171	+	3511913	3511917	3511860	3511862	12	736.257	1.47e-28	CDS	sRNA	AGATACGGTTTACTTTCTGGTTAAAATTTTGCCGTCAGGGTTTCTATGCGTGCTAAGGGAAAGAAATTTA	ATTTCCCTGGTGTTGGCGCAGTATTCGCGCACCCCGGTCAAACCGGGGTCATTTTTTT
ycaI(SL1344_0920)	ArcZ(ncRNA0002)	+	1026792	1026838	1026857	1026858	+	3511916	3511918	3511860	3511861	11	1855.96	1.01e-28	CDS	sRNA	GCAAGGTAAAACAGCGCTACCGACAGCAGGCGTATCAGTGGTTTGATACACCCCACCAGGGGCAAAT	ATTTCCCTGGTGTTGGCGCAGTATTCGCGCACCCCGGTCAAACCGGGGTCATTTTTTTT
yejM(SL1344_2205).AS	ArcZ(ncRNA0002)	-	2328281	2328282	--	--	+	3511915	3511917	3511860	3511861	13	2924.61	9.09e-35	Antisense	sRNA	TATTATTGAGCACCAGGGTCAT	ATTTCCCTGGTGTTGGCGCAGTATTCGCGCACCCCGGTCAAACCGGGGTCATTTTTTT
yhjC(SL1344_3572).yhjD(SL1344_3573).IGR	ArcZ(ncRNA0002)	+	3802920	3802935	--	--	+	3511913	3511918	3511859	3511862	27	1.82258e+07	3.92e-77	IGR	sRNA	AGTAGCCGCATTTTCAGCATCCACCGGGGAGAAGCT	GATTTCCCTGGTGTTGGCGCAGTATTCGCGCACCCCGGTCAAACCGGGGTCATTTTTTTT
yhjE(SL1344_3574)	GcvB(ncRNA0014)	+	3804349	3804380	3804393	3804410	+	3156913	3156984	3156836	3156847	10	235.571	2.26e-18	CDS	sRNA	TTCGTTCGCTAAAAATAAGAAAATAGTATGCAAGCAACCGCCACAACACTCGACCATGAGCA	TTACGGTTGTGATGTTGTGTTGTTGTGTTTGCAATTGGTCTGCGATTCAGACCACGGTAGCGAGACTACCCTTTTTCACTTCCTGTACATTTACCCTGTCTGTCCATAGTGATTAATGTAGCACCGCCATATTGCGGTGCTTTTTTTTG
yhjJ(SL1344_3578)	ArcZ(ncRNA0002)	-	3811414	3811453	3811386	3811391	+	3511915	3511918	3511859	3511860	26	91.409	6.67e-41	5UTR	sRNA	CGAAGTGTTTTTACGTCATATTCAGGCATCCCTGCCGGGGCTGTCTTTTTATTACCAGGATTGTTGAT	GATTTCCCTGGTGTTGGCGCAGTATTCGCGCACCCCGGTCAAACCGGGGTCATTTTTTTT
yhjW(SL1344_3600)	MgrR(ncRNA0043)	-	3843613	3843697	3843488	3843593	+	1550825	1550846	1550760	1550807	240	87.5406	0	CDS	sRNA	CCGTGCTTGTAGACTTTCTTACATCTGCGTTAGCCGCATATTTACCTGTTTGATTAAAGAATCGTTGTACAGGTCGTTTTTATCCCGATTCCCAGGGTTTGTTTGCATGAGATACATTAAATCGATGACGCAACAGAAACTTAGTTTCTTGCTTGCGCTCTATATCGGTCTGTTTATGAATTGCGCCGTGTTTTACCGCCGTTTCGGCAG	CAAGAATTTGCCCGGTAGCGTATAAGCAAAACACAAATCTATCCATGCAAGCATTTACCGCTGGTGAACCGGCGGTTTTTTTTTGCC
yifK(SL1344_3889)	GcvB(ncRNA0014)	+	4160898	4160982	4160949	4160963	+	3156845	3156986	3156812	3156856	163	317.153	1.23e-150	5UTR	sRNA	ACAATCGATGTACCCATAACAATAACCGGTACTACCGGAACCGTTGCAAACACGACATGAGGATTT	TGCGTGTTCTGATGGGCTTTTGGCTTACGGTTGTGATGTTGTGTTGTTGTGTTTGCAATTGGTCTGCGATTCAGACCACGGTAGCGAGACTACCCTTTTTCACTTCCTGTACATTTACCCTGTCTGTCCATAGTGATTAATGTAGCACCGCCATATTGCGGTGCTTTTTTTTGTA
yihG(SL1344_3946)	STnc2110(ncRNA0286)	-	4227066	4227102	4227036	4227036	-	4030646	4030653	4030686	4030700	22	318.524	8.27e-47	CDS	sRNA	CCGATCATCATTGCCGGTATGGTAAAGCTTCTTTTGCCTGTTCCCGGTATCTGGCGCAAGGTCTCCA	TAAATAGCTAATGAGCTCCTTGCCTTGCCCCGCCAGAGATGGCGGGGCTTTTTTT
yijC(SL1344_4076).yijD(SL1344_4077).IGR	Spf(ncRNA0075)	+	4367621	4367645	4367657	4367671	+	4230560	4230612	4230530	4230542	19	11.1502	9.68e-13	IGR	sRNA	GCAAGAGAAAATAGCACATCATTCCGAATAACGTGAAGGACGAGTAATGAA	CTTTCAGACCTTTTACTTCACGTAATCGGATTTGGCTGAATATTTTAGCCGCCCCAGTCAGTTTATGACTGGGGCGTTTTTTA
yijP(SL1344_4068)	STnc870(ncRNA0205)	-	4356517	4356600	4356481	4356483	+	4292596	4292599	4292556	4292563	35	441.953	3.18e-76	5UTR	sRNA	TGCATTTTATGCATTTGTAAATCTTTCTTAGCAAAACGTGCGGCATAAAGCAGGTTTGCTTCAGATTCTTTTAAGGTTCAGGCGTTACGTTTGGCGCTACGATTAAAGACAGGCTCTCAT	ACACCATCCCTGTCTTCCCCCACATGATGTGGGGGTTTTTTTTA
yjeH(SL1344_4265).AS	ArcZ(ncRNA0002)	+	4594000	4594064	4594096	4594100	+	3511913	3511918	3511860	3511862	79	17787.6	2.36e-219	Antisense	sRNA	AGCATACAAAGCAGATAGAGCATAATAAAAATACCGTTAGCATAGACGATCAGCGCATTGAGGTTAATCTTCAGGGCGTAGACGACCAGGGAACTCACGCA	ATTTCCCTGGTGTTGGCGCAGTATTCGCGCACCCCGGTCAAACCGGGGTCATTTTTTTT
yjeQ(SL1344_4286)	ArcZ(ncRNA0002)	-	4615298	4615310	4615261	4615276	+	3511913	3511918	3511859	3511863	135	449.529	1.58e-285	CDS	sRNA	AGATGTTTTGCCCACTATGGGCGACCAGGAGCCAGTACGATTGAGCAAAA	GATTTCCCTGGTGTTGGCGCAGTATTCGCGCACCCCGGTCAAACCGGGGTCATTTTTTTT
yjeQ(SL1344_4286)	ArcZ(ncRNA0002)	-	4615317	4615364	4615275	4615279	+	3511913	3511917	3511860	3511861	15	297.762	5.36e-31	5UTR	sRNA	CCTTCAGAGGTCACATTCACTGTGACTATATTCATCTACAATTGCGTGTATCATAGATGTTTTGCCCACTATGGGCGACCAGGAGCCAGT	ATTTCCCTGGTGTTGGCGCAGTATTCGCGCACCCCGGTCAAACCGGGGTCATTTTTTT
yohJ(SL1344_2158)	STnc2000(ncRNA0278)	+	2275676	2275684	2275738	2275738	-	1204288	1204306	1204328	1204336	17	7442.22	2.76e-58	CDS	sRNA	GCTTTTGTATTGATTTATGCCTGTTTGTACGCAGGCATTTTTCTTGCATCACTGCTTCCTATC	AAAAATGATATGCAGTGATGTATGTTTGCCGGGTCGCCCCGGCTTTTTT
ypfM(SL1344_2444A)	ArcZ(ncRNA0002)	-	2594628	2594708	2594606	2594611	+	3511913	3511918	3511859	3511866	221	7477.57	0	CDS	sRNA	ACAATCGGTTAAATGAACTTCTCTCTATACCGCTAACTACGTAGAATACCCATAATAATAAGAGAGGCTATTATGATTGAACGTGAACTGGGGAACTGGAAAG	GATTTCCCTGGTGTTGGCGCAGTATTCGCGCACCCCGGTCAAACCGGGGTCATTTTTTTT
yrdA(SL1344_3366).AS	ArcZ(ncRNA0002)	-	3594365	3594388	3594340	3594344	+	3511914	3511918	3511859	3511861	10	118.401	1.16e-17	Antisense	sRNA	ATATAAATAGCCGCTTTCCAGCCGTTTGTGCTGCGGCACCAGGCTTCCC	GATTTCCCTGGTGTTGGCGCAGTATTCGCGCACCCCGGTCAAACCGGGGTCATTTTTTTT
yrfF(SL1344_3462)	ArcZ(ncRNA0002)	+	3671524	3671572	3671592	3671596	+	3511913	3511919	3511861	3511862	31	1162.61	2.11e-75	5UTR	sRNA	TAACTCCAGGAATTTGCTGATATTCCGTTTTTGGTGGTATTGCTATGATTTGCCTTCACTGGGATGCGCTTTA	TTTCCCTGGTGTTGGCGCAGTATTCGCGCACCCCGGTCAAACCGGGGTCATTTTTTTTC
yrfF(SL1344_3462)	ArcZ(ncRNA0002)	+	3672435	3672477	3672507	3672517	+	3511913	3511918	3511860	3511861	39	446.275	1.31e-83	CDS	sRNA	GGCTTTTTGCGCCGCCGTCGAAAAGCGCGCTGCGGGAAATTCACTGTCTGCGGGGAACGCCCCGCCGCTGGGGACTGTTTGGG	ATTTCCCTGGTGTTGGCGCAGTATTCGCGCACCCCGGTCAAACCGGGGTCATTTTTTTT
yshB(SL1344_3951A)	SL1344_3819(SL1344_3819)	-	4234022	4234081	4233987	4233990	+	4081301	4081305	4081266	4081266	17	5853.47	5.82e-58	3UTR	3UTR	TGTTCAGCTGACAATGTGCCGGATGGCGCTAATGCTTATCCGGCCTACAGGTTGTCGCAACGTGTAGGCCTGGTAAGCGCAGCGCCACCGGGCAA	TGTAGGCCCGGTAAGCGCAGCGCCACCGGGCAAAAGAATG
ytfM(SL1344_4342)	SdsR(ncRNA0070)	+	4666592	4666618	4666641	4666643	-	1925618	1925625	1925690	1925694	28	395.799	5.23e-61	5UTR	sRNA	TTTTTCCAGGGGTGGGAATAGGGGATATTCAGGAGAAAATGTGCCACATATC	AACTTTTAGCGCACGGCTCTCTCCCAAGAGCCATTTCCCTGGACCGAATACAGGAATCGTATTCGGTCTCTTTTTAT
zwf(SL1344_1820)	MicF(ncRNA0046)	-	1938721	1938762	1938693	1938702	+	2364713	2364722	2364645	2364649	31	261.635	1.41e-61	CDS	sRNA	AATTACAACGATATCCTGGCTAAAGTACCAGGAGATTAACTAAGGAGAATGACATGGCGGTAACGCAAAC	TATTTATTACCGTCATTCACTTCTGAATGTCTGTTTACCCCTATTTCAACCGGATGCTTCGCATTCGGTTTTTTTTAC

## Sheet: OD2.0
RNA1 name	RNA2 name	RNA1 Strand	RNA1 from	RNA1 to	RNA1 ligation from	RNA1 ligation to	RNA2 Strand	RNA2 from	RNA2 to	RNA2 ligation from	RNA2 ligation to	Number of interactions	Odds Ratio	Fisher's exact test p-value	RNA1 type	RNA2 type	RNA1 seq	RNA2 seq
aceF(SL1344_0153)	InvR(ncRNA0023)	+	178888	178896	178918	178934	+	3067543	3067586	3067512	3067518	17	46.4718	3.03e-20	CDS	sRNA	TAACCCGCGTCTGGCGTAAGAGGTAAAAGAATAATGGCTATCGAAAT	TTGGCCATTTGTCTCTTACGTTGCATTTATCAATCTGCTTTTTGATACAGCAGCACCTCGCTGCTGCTTTTTTTA
ackA(SL1344_2306)	RybD(ncRNA0062)	+	2445525	2445647	2445657	2445676	+	807418	807435	807367	807398	1122	7012.48	0	CDS	sRNA	GGTATTTCTTCCATCATGCCCAAAAAAACTCCTGCGCATGATGTTAATCATAAATGTCAGGGCTATCATGCGCTACGCTCTATGGCTCACTGACGTTTTTTTAGCCACGTATCATAAATAGGTACTTCCATGTCGAGTAAGTTAGTACTGGT	TCCTGCGGGAACAGATAAATGTCCGTTTTCGACATGGTTGGCCACCTTTACGGTGGCCTTTTTTATGGC
acnB(SL1344_0159)	ArcZ(ncRNA0002)	+	185838	185867	185899	185910	+	3511913	3511918	3511860	3511860	22	49.5649	9.33e-29	CDS	sRNA	GAGGAGATATCGTCGTGCTAGAAGAATACCGTAAGCACGTAGCTGAGCGTGCTGCCCAGGGGATTGTGCCAAA	ATTTCCCTGGTGTTGGCGCAGTATTCGCGCACCCCGGTCAAACCGGGGTCATTTTTTTT
acpP(SL1344_1133)	ArcZ(ncRNA0002)	+	1236406	1236471	1236487	1236528	+	3511913	3511919	3511859	3511864	150	9.79995	3.22e-91	3UTR	sRNA	TGATACTGAGATTCCGGACGAAGAAGCTGAGAAAATCACCACCGTTCAGGCTGCCATTGATTACATCAACGGCCACCAGGCGTAAGTGAACATCTCCAGGCGGTCGTTCGACCGCCTGAGTTT	GATTTCCCTGGTGTTGGCGCAGTATTCGCGCACCCCGGTCAAACCGGGGTCATTTTTTTTC
acpP(SL1344_1133)	MgrR(ncRNA0043)	+	1236149	1236162	1236181	1236188	+	1550790	1550844	1550764	1550766	34	174.545	2.86e-31	5UTR	sRNA	GTAAAATCGTGGTAAGACCTGCCGGGATTTAGTTGCAAAT	AATTTGCCCGGTAGCGTATAAGCAAAACACAAATCTATCCATGCAAGCATTTACCGCTGGTGAACCGGCGGTTTTTTTTTG
acpP(SL1344_1133)	RyeF(ncRNA0065)	+	1236240	1236248	1236272	1236280	-	1958511	1958514	1958557	1958566	14	1902.94	2.82e-41	CDS	sRNA	GGAAATTTAAGAGTATGAGCACTATCGAAGAACGCGTTAAG	CAATATGATGCTTGCTCGTACCAGGCCCCTGCCAATTCAACAGGGGCCTTTTTTTC
acrA(SL1344_0469)	RybD(ncRNA0062)	-	533128	533179	533103	533111	+	807430	807432	807352	807353	16	1402.65	4.25e-41	5UTR	sRNA	GACGATAATATAAACGCAGCAATGGGTTTAAGGACCTTTGACCATTGACCAATTTGAAATCGGACACTCGAGGTTTA	AATAAAACTCGCTGTTCCTGCGGGAACAGATAAATGTCCGTTTTCGACATGGTTGGCCACCTTTACGGTGGCCTTTTTTAT
acrB(SL1344_0468)	ArcZ(ncRNA0002)	-	530216	530999	530166	530172	+	3511913	3511943	3511860	3511900	32	117.702	3.66e-34	CDS	sRNA	CGGCGCCAACGCGCTGGATACCGCTACCGCTATTCGTGCCGAACTGAAAAAAATGGAACCGTTCTTCCCGCCAGGGATGAAAATCGTCTACCCGTATGACACCACGCCGTTCGTGAAGATCTCTATTCATGAAGTGGTAAAAACGCTGGTCGAAGCGATTATCCTCGTGTTCCTGGTGATGTACCTGTTCCTGCAGAACTTCCGCGCGACGTTGATTCCGACTATTGCGGTTCCGGTGGTGTTGTTGGGAACCTTTGCCGTGCTTGCGGCATTCGGTTTCTCGATAAACACGCTGACGATGTTCGGGATGGTGCTCGCCATCGGCTTGCTGGTGGATGACGCCATCGTGGTGGTCGAGAACGTCGAACGTGTTATGACGGAAGAAGGCCTTCCGCCGAA…	ATTTCCCTGGTGTTGGCGCAGTATTCGCGCACCCCGGTCAAACCGGGGTCATTTTTTTTCCGCGTTTGCCACCCAGGCTTTCAG
adhC(SL1344_1557)	ArcZ(ncRNA0002)	-	1674580	1674596	1674558	1674558	+	3511914	3511917	3511861	3511862	10	53.4379	3.84e-14	CDS	sRNA	ATTAACGATGCCTTTGAACTGATGCATCAGGGTAAATCC	TTTCCCTGGTGTTGGCGCAGTATTCGCGCACCCCGGTCAAACCGGGGTCATTTTTTT
adi(SL1344_4233).AS	ArcZ(ncRNA0002)	+	4559905	4559934	4559956	4559961	+	3511915	3511919	3511860	3511861	11	842.544	3.64e-24	Antisense	sRNA	GCGCAAAAAGGTATGACAGTATTATTGTTTTGCAGCAATACTCAGGGAATACATGCC	ATTTCCCTGGTGTTGGCGCAGTATTCGCGCACCCCGGTCAAACCGGGGTCATTTTTTTTC
adiY(SL1344_4232)	MgrR(ncRNA0043)	-	4559675	4559703	4559650	4559658	+	1550842	1550844	1550760	1550799	11	226.441	9.13e-22	CDS	sRNA	CAGGAGTTCGGGTATGAGGATTTGCAGCAACGAACCTTGCATAGTGTTATTAAC	CAAGAATTTGCCCGGTAGCGTATAAGCAAAACACAAATCTATCCATGCAAGCATTTACCGCTGGTGAACCGGCGGTTTTTTTTTG
agp(SL1344_1056)	STnc870(ncRNA0205)	+	1159997	1160033	1160061	1160065	+	4292572	4292599	4292538	4292556	16	12733.2	8.97e-50	CDS	sRNA	TGATAACAACAAGAGGTCATAGGGATGAAAAAATCATTACTCGCTGTTGCTGTGGCAGGGGCTGTTTTG	CTGTTTTCCTTGCCATAGACACCATCCCTGTCTTCCCCCACATGATGTGGGGGTTTTTTTTA
ahpF(SL1344_0597)	FnrS(ncRNA0013)	+	672297	672331	672382	672384	-	1706782	1706785	1706866	1706904	15	5.27176	4.84e-07	3UTR	sRNA	AATCGCATAAAAAGAAGTAAGCACACCTGCAAGGCCAGTTAACTGGCCATCGTAAATGGCCCGATAGTGTAAGCTATTCGGGCCTGCG	GCAGGTGAATGCAACGTCAAGCGATGGGCGTTGCGCTCCATATTGTCTTACTTCCTTTTTTGAATTACTGCATAGCACAATTGATTCGTACGACGCCGACTTAGATTAGTCGGCTTTTTTTTG
alaS(SL1344_2807)	DsrA(ncRNA0011)	-	2996567	2996592	2996524	2996557	-	2026215	2026251	2026276	2026279	26	81.4571	1.42e-39	CDS	sRNA	TGATTTCAGGATAATTATGAGCAAGAGCACCGCTGAGATCCGTCAGGCGTTTCTCGACTTTTTCCATAG	CGAATTTTCAAGTGCTTCTTGCATAAGCAAGTTTGATCCCGACCCGTAGGGCCGGGATTTTTTTC
aphA(SL1344_4185)	ArcZ(ncRNA0002)	+	4491915	4491952	4491968	4491976	+	3511913	3511918	3511860	3511861	108	365.185	2.59e-206	5UTR	sRNA	GTTTTTTGAGCAAAGACTCATCTTAATAATTATAATATTTTGAATTTTAAGGGAAAACCATG	ATTTCCCTGGTGTTGGCGCAGTATTCGCGCACCCCGGTCAAACCGGGGTCATTTTTTTT
aphA(SL1344_4185).AS	ArcZ(ncRNA0002)	-	4492001	4492201	4491976	4492167	+	3511913	3511918	3511860	3511862	37	1608.53	9.79e-32	Antisense	sRNA	AAATAACACGGTGTCGTCAATATCAAAGCCGACCGCCATCGGCGGGCGTCCGGTGAGGCTGTTTTCAATCTGGGCGACAGAGACCCAATGGACAGGCGCTTGTTCCGCGAGTTTTGCAACATTAGTGCCCGGATTGAGCGTCGAAGGGGAAGATACTAACGCATTCGCGGAATGGTTTAGCGTAAACAACAAACAGACGGCACTCAGCGCCAGGGTTATTTTTTTC	ATTTCCCTGGTGTTGGCGCAGTATTCGCGCACCCCGGTCAAACCGGGGTCATTTTTTTT
apt(SL1344_0476)	ArcZ(ncRNA0002)	+	540288	540325	540343	540349	+	3511915	3511917	3511860	3511862	11	35.1059	1.23e-13	3UTR	sRNA	TATTCGCACTGCTATTTTAGCCAGAGAGACAACCTCGCTGTATCGGCGAGGTTGTGTTAGCA	ATTTCCCTGGTGTTGGCGCAGTATTCGCGCACCCCGGTCAAACCGGGGTCATTTTTTT
apt(SL1344_0476)	RprA(ncRNA0058)	+	539703	539734	539755	539758	-	1401682	1401708	1401730	1401733	63	10147.5	1.72e-171	CDS	sRNA	ACACCGTACTTAGCAGGCATATATCCATGACCGCGACTGCACAGCAGCTTGAGTTT	CGAATTGCTGTGTGTAGTCTTTGCCCGTCTCCTACGATGGGCTTTTTTTTTA
araB(SL1344_0103)	araB(SL1344_0103)	-	120136	120204	120099	120173	-	121216	121258	121263	121279	29	382.113	5.98e-64	CDS	CDS	GATTAACGCCAGCCAGAAGCAGCTACTGCCAGCGCTCACCGACGCCTGGGCGAAAAATCCGTCCCTGGATCACCTGCCGGTGGTGCTCGACTGGTTTAACGGTCGC	ATTTTGGCAGTGATTCAGTGCGCGCTCTGGCAGTGGACTGCGCCACCGGCGACGAGATCGCCAC
araB(SL1344_0103)	STnc870(ncRNA0205)	-	121295	121331	121264	121293	+	4292565	4292600	4292539	4292543	126	544.112	7.03e-210	CDS	sRNA	CATACCTGTTTTTCTGGATGGAGTAAGACGATGGCAATTGCAATTGGCCTCGATTTTGGCAGTGATTC	TGTTTTCCTTGCCATAGACACCATCCCTGTCTTCCCCCACATGATGTGGGGGTTTTTTTTAT
araC(SL1344_0104)	ArcZ(ncRNA0002)	+	122430	122434	--	--	+	3511913	3511918	3511860	3511866	18	229.795	2.44e-33	CDS	sRNA	GGTATTTAAAAAATGCACCGGGGCA	ATTTCCCTGGTGTTGGCGCAGTATTCGCGCACCCCGGTCAAACCGGGGTCATTTTTTTT
araD(SL1344_0101)	GcvB(ncRNA0014)	-	117252	117293	117206	117261	+	3156913	3156984	3156844	3156855	19	7.95091	2.21e-11	3UTR	sRNA	GATAAACACTATCTACGCAAACACGGCGCAAAAGCCTATTACGGGCAGTAATGCCTCTAAAAACGCGTCCCATGGGGGGCGCGTTGAT	GTGATGTTGTGTTGTTGTGTTTGCAATTGGTCTGCGATTCAGACCACGGTAGCGAGACTACCCTTTTTCACTTCCTGTACATTTACCCTGTCTGTCCATAGTGATTAATGTAGCACCGCCATATTGCGGTGCTTTTTTTTG
araE(SL1344_2994)	ArcZ(ncRNA0002)	-	3197816	3197862	3197777	3197831	+	3511914	3511919	3511859	3511866	41	11.7785	3.97e-29	CDS	sRNA	ATGAACATCATTATGTACTATGCGCCGCGCATTTTTAAAATGGCCGGCTTTACCACCACGGAACAGCAAATGATCGCCACGCTGGT	GATTTCCCTGGTGTTGGCGCAGTATTCGCGCACCCCGGTCAAACCGGGGTCATTTTTTTTC
araJ(SL1344_0389)	ArcZ(ncRNA0002)	-	445519	445539	445491	445502	+	3511913	3511919	3511858	3511863	24	6.44296	2.99e-12	CDS	sRNA	TTTTTCTTTGGCGCTGGGTACGTTCGGACTGGGGATGGCCGAGTTTGGC	CGATTTCCCTGGTGTTGGCGCAGTATTCGCGCACCCCGGTCAAACCGGGGTCATTTTTTTTC
araJ(SL1344_0389)	CyaR(ncRNA0009)	-	445419	445608	445302	445551	+	2228895	2228934	2228845	2228884	214	89.4905	1.13e-142	CDS	sRNA	TGTGACAATTCACAGCCACAGCGCGCAACATGCGCCTTTATTTTCGGCAGGTGGTATGAAAAAAGTTATTTTTTCTTTGGCGCTGGGTACGTTCGGACTGGGGATGGCCGAGTTTGGCATTATGGGCGTGCTGACGGAGCTGGCACGCGATGTCGGGATAACAATTCCCGCCGCCGGGCATATGATCTCGTTTTACGCCTTCGGCGTCGTGCTGGGCGCGCCTGTTATGGCGCTCTTTTCCAGCCGCTTTTCGCTTAAACATATACTGTTGTTTCTGGTCATGTTGTGCGTGATGGGCAATGCCATA	CGCTGAAAAACATAACCCATAAATGCTAGCTGTACCAGGAACCACCTCCTTGGCCTGCGTAATCTCCCTTACGCAGGCTTATTTTTTGCG
araJ(SL1344_0389)	STnc870(ncRNA0205)	-	444824	445602	444793	445553	+	4292564	4292600	4292538	4292560	184	329.049	2.35e-308	CDS	sRNA	AATTCACAGCCACAGCGCGCAACATGCGCCTTTATTTTCGGCAGGTGGTATGAAAAAAGTTATTTTTTCTTTGGCGCTGGGTACGTTCGGACTGGGGATGGCCGAGTTTGGCATTATGGGCGTGCTGACGGAGCTGGCACGCGATGTCGGGATAACAATTCCCGCCGCCGGGCATATGATCTCGTTTTACGCCTTCGGCGTCGTGCTGGGCGCGCCTGTTATGGCGCTCTTTTCCAGCCGCTTTTCGCTTAAACATATACTGTTGTTTCTGGTCATGTTGTGCGTGATGGGCAATGCCATATTTACCTTTTCCTCGTCATATCTGATGCTCGCCGTCGGCAGACTGGTTTCCGGCTTTCCGCACGGTGCCTTTTTTGGCGTCGGCGCCATTGTCTTGTC…	CTGTTTTCCTTGCCATAGACACCATCCCTGTCTTCCCCCACATGATGTGGGGGTTTTTTTTAT
arcA(SL1344_4525)	STnc740(ncRNA0194)	-	4876673	4876675	--	--	-	2240283	2240285	2240324	2240333	10	65888.3	9.91e-45	5UTR	sRNA	GGTAGCAAACATGCAGACCCCGC	AAAAAGTAACATGGGGCTGTATTTCCCCCTCTGGATGAGGGGGCTTTTTTT
arcB(SL1344_3300)	ArcZ(ncRNA0002)	-	3512616	3512648	3512592	3512595	+	3511913	3511917	3511860	3511865	16	102.13	1.38e-25	CDS	sRNA	GATATTGAACTGAACGTGATCGTGGCGCGTTCGGTACTGGAAAAACTGGGGAACAGC	ATTTCCCTGGTGTTGGCGCAGTATTCGCGCACCCCGGTCAAACCGGGGTCATTTTTTT
argR(SL1344_3332)	ArcZ(ncRNA0002)	+	3549738	3549771	3549800	3549801	+	3511913	3511917	3511859	3511862	20	109.428	4.21e-32	CDS	sRNA	ATTCATACCAGCCCCGGCGCGGCACAACTCATTGCACGCCTGCTGGATTCACTGGGGAAAGCAG	GATTTCCCTGGTGTTGGCGCAGTATTCGCGCACCCCGGTCAAACCGGGGTCATTTTTTT
aroA(SL1344_0915).AS	ArcZ(ncRNA0002)	-	1020439	1020496	1020408	1020434	+	3511913	3511918	3511860	3511862	44	532.249	5.89e-89	Antisense	sRNA	CGCAACAGAAGACTTAGGCAGGCGTACTCATTCGCGCCAGTTGTTCGAAATAATCAGGGAACGTTTTTGCGGTACATTTAGGGTCCAGG	ATTTCCCTGGTGTTGGCGCAGTATTCGCGCACCCCGGTCAAACCGGGGTCATTTTTTTT
aroC(SL1344_2353)	GcvB(ncRNA0014)	-	2493334	2493397	2493309	2493360	+	3156915	3156985	3156835	3156928	26	75.6196	1.86e-36	CDS	sRNA	TTCAATATTTATAAAGATTAAAACACGCAAACGACAACAACGATAACGGAGCCGTGATGGCAGGAAACACAATTGGACAACTCTTTCGC	CTTACGGTTGTGATGTTGTGTTGTTGTGTTTGCAATTGGTCTGCGATTCAGACCACGGTAGCGAGACTACCCTTTTTCACTTCCTGTACATTTACCCTGTCTGTCCATAGTGATTAATGTAGCACCGCCATATTGCGGTGCTTTTTTTTGT
aroE(SL1344_3368)	RprA(ncRNA0058)	-	3595541	3595563	3595513	3595525	-	1401683	1401686	1401731	1401732	12	558.181	4.38e-29	CDS	sRNA	GGAAACCTATGCTGTTTTTGGAAATCCGATTGCGCACAGCAAATCGCCATT	GAATTGCTGTGTGTAGTCTTTGCCCGTCTCCTACGATGGGCTTTTTTTTT
artI(SL1344_0866)	RprA(ncRNA0058)	-	960242	960276	960221	960221	-	1401683	1401687	1401730	1401733	17	3452.78	4.57e-52	CDS	sRNA	AGTTCTGATTGCCGCGCTAATTGCAGGCTTTAGCCTTTCCGCTACAGCAGCCCAGA	CGAATTGCTGTGTGTAGTCTTTGCCCGTCTCCTACGATGGGCTTTTTTTTT
asd(SL1344_3506)	MgrR(ncRNA0043)	-	3731118	3731178	3731084	3731132	+	1550824	1550844	1550792	1550800	27	234.078	1.18e-51	5UTR	sRNA	TGATGGCTTCGCTATCATTGATTAATTTCACTTGCGACTTTGGCTGCTTTTTGTATGGTGAAGGATGCGCCACAGGATACTGGCGCGCATACACA	ACAAATCTATCCATGCAAGCATTTACCGCTGGTGAACCGGCGGTTTTTTTTTG
asnA(SL1344_3844)	ArcZ(ncRNA0002)	+	4106638	4106710	4106721	4106732	+	3511913	3511921	3511859	3511865	91	18.8819	1.35e-60	CDS	sRNA	CAAACAACGTCAAATTAGCTTCGTGAAATCACATTTCTCTCGCCAGCTGGAGGAGCGTCTGGGTCTGATTGAGGTCCAGGCGCCGATCCTGAGTC	GATTTCCCTGGTGTTGGCGCAGTATTCGCGCACCCCGGTCAAACCGGGGTCATTTTTTTTCCG
asnS(SL1344_0937)	ArcZ(ncRNA0002)	-	1049213	1049505	1049176	1049402	+	3511915	3511917	3511859	3511862	36	79.6664	2.48e-38	CDS	sRNA	TACCCCCATTTCGGGTGGACAAGTGTTTATTTTTTCCGACTATTAACTAGAGAGAATATTATGAGCGTTGTGCCTGTAGCCGACGTACTCCAGGGCCGCGTAGCCGTTGACCAAGAAGTCACCGTGCGCGGATGGGTGCGTACCCGCCGAGATTCAAAAGCTGGCATCTCCTTCCTCGCCGTTTATGACGGCTCCTGCTTTGATCCTGTACAGGCTGTCATTAATAATTCTCTGCCCAATTATAATGAAGAAGTATTACACCTGACGACAGGCTGCTCCGTGGTAGTAACAGGTAAGGTTGTCGCGTCGCCGGGACAGGGGCAAAGTTTC	GATTTCCCTGGTGTTGGCGCAGTATTCGCGCACCCCGGTCAAACCGGGGTCATTTTTTT
aspC(SL1344_0935)	ArcZ(ncRNA0002)	-	1046078	1046107	1046070	1046077	+	3511913	3511917	3511860	3511861	11	31.9953	3.07e-13	CDS	sRNA	TGTTTCGCGCCGATGACCGTCCAGGGAAAATTAACCTT	ATTTCCCTGGTGTTGGCGCAGTATTCGCGCACCCCGGTCAAACCGGGGTCATTTTTTT
bacA(SL1344_3178)	MicF(ncRNA0046)	-	3392114	3392157	3392090	3392092	+	2364720	2364721	2364667	2364679	11	366.306	2.5e-24	5UTR	sRNA	GGTTATATATGGGGTCTTAACGCGAGATCCATTTTTGCAGTGTTTTTCATTTTAGGGGTTTATTGATG	CTGAATGTCTGTTTACCCCTATTTCAACCGGATGCTTCGCATTCGGTTTTTTTTA
bax(SL1344_3628)	ArcZ(ncRNA0002)	-	3871556	3871593	3871530	3871531	+	3511915	3511918	3511860	3511861	10	37.0618	9.8e-13	5UTR	sRNA	TTCAAACCTCAACTTCGTGAAAAATAAAAGGTGTTGGAATGTATCAATCCGACCAGGAGACCTA	ATTTCCCTGGTGTTGGCGCAGTATTCGCGCACCCCGGTCAAACCGGGGTCATTTTTTTT
blr(SL1344_1393A)	ArcZ(ncRNA0002)	-	1492939	1492997	1492919	1492928	+	3511915	3511918	3511855	3511861	11	101.105	5.5e-18	CDS	sRNA	TGGATAGTTCTCGTTATCTCAGTCATTCTTTTAGGTATTGCCAACCATATTGACAATTACCAACCACCAGAGCCCACGG	CCACGATTTCCCTGGTGTTGGCGCAGTATTCGCGCACCCCGGTCAAACCGGGGTCATTTTTTTT
brnQ(SL1344_0394)	GcvB(ncRNA0014)	+	452688	452733	452722	452775	+	3156949	3156985	3156842	3156926	145	189.615	6.69e-235	CDS	sRNA	GAAAGGCAAAAATTTTAATGTTTACAACATCACCATCCACAGGCAGTAAGACTTTATGACCCATCAGTTAAAATCGCGCGATATCATC	TTGTGATGTTGTGTTGTTGTGTTTGCAATTGGTCTGCGATTCAGACCACGGTAGCGAGACTACCCTTTTTCACTTCCTGTACATTTACCCTGTCTGTCCATAGTGATTAATGTAGCACCGCCATATTGCGGTGCTTTTTTTTGT
caiE(SL1344_0070).AS	CyaR(ncRNA0009)	+	81114	81153	81177	81184	+	2228917	2228932	2228862	2228878	14	10.8119	1.7e-10	Antisense	sRNA	CCGTTCGACAACGGATCGCAAGATCCTGATATTCTTTGGTATTGAGGTGTTTCCAGTGCAGCTCCTGGTCC	CATAAATGCTAGCTGTACCAGGAACCACCTCCTTGGCCTGCGTAATCTCCCTTACGCAGGCTTATTTTTTG
caiF(SL1344_0069)	GcvB(ncRNA0014)	+	80466	80482	80519	80522	+	3156948	3156984	3156912	3156926	10	37.5264	1.78e-12	5UTR	sRNA	CATATCCACAATTTTAATATGGCTTAGTTTTTATTAGTTTGGACAGGCCGTAGCCAG	CACTTCCTGTACATTTACCCTGTCTGTCCATAGTGATTAATGTAGCACCGCCATATTGCGGTGCTTTTTTTTG
cap(SL1344_3433	ArcZ(ncRNA0002)	+	3637196	3637215	3637233	3637238	+	3511913	3511920	3511860	3511863	47	94.758	6.02e-71	CDS	sRNA	TACCCGTCAAAGAGCACGCTGATTCACCAGGGTGAAAAAGCAG	ATTTCCCTGGTGTTGGCGCAGTATTCGCGCACCCCGGTCAAACCGGGGTCATTTTTTTTCC
cap(SL1344_3433)	ArcZ(ncRNA0002)	+	3637117	3637187	3637237	3637238	+	3511913	3511918	3511859	3511861	11	15.3189	4.8e-10	CDS	sRNA	ATAACCGCGCATGGTGCTTGGCAAACCGCAAACAGACCCGACTCTTGAATGGTTCTTGTCTCATTGCCACATTCATAAGTACCCGTCAAAGAGCACGCTGATTCACCAGGGTGAAAAAGCAG	GATTTCCCTGGTGTTGGCGCAGTATTCGCGCACCCCGGTCAAACCGGGGTCATTTTTTTT
cap(SL1344_3433)	MgrR(ncRNA0043)	+	3637103	3637154	3637136	3637189	+	1550813	1550848	1550764	1550796	41	150.109	5.54e-71	CDS	sRNA	GCTTATAACAGAGGATAACCGCGCATGGTGCTTGGCAAACCGCAAACAGACCCGACTCTTGAATGGTTCTTGTCTCATTGCCACATT	AATTTGCCCGGTAGCGTATAAGCAAAACACAAATCTATCCATGCAAGCATTTACCGCTGGTGAACCGGCGGTTTTTTTTTGCCTG
cbiG(SL1344_2004)	ArcZ(ncRNA0002)	-	2104516	2104518	--	--	+	3511916	3511917	3511859	3511861	12	393.919	2.15e-24	CDS	sRNA	TGGTTATTAAGCCAGGGACAATT	GATTTCCCTGGTGTTGGCGCAGTATTCGCGCACCCCGGTCAAACCGGGGTCATTTTTTT
cedA(SL1344_1254)	ArcZ(ncRNA0002)	+	1356740	1356765	1356813	1356813	+	3511913	3511918	3511857	3511860	10	104.447	1.38e-16	CDS	sRNA	TTCAACGGTCGCCCGCCTTTAGCGTGCCAGAATCGGCGCAACGTTGGGCGAATCAGGTTCGCCAGGAAAACGAA	ACGATTTCCCTGGTGTTGGCGCAGTATTCGCGCACCCCGGTCAAACCGGGGTCATTTTTTTT
cfa(SL1344_1359)	STnc870(ncRNA0205)	-	1462372	1462411	1462348	1462365	+	4292569	4292601	4292537	4292542	209	727.971	0	5UTR	sRNA	ACGGGAACCGGAGCGTTCCCGATTCACCATGGATGGCCTTTTCGGCAAGGGCTCCTCCCTTCCT	CCTGTTTTCCTTGCCATAGACACCATCCCTGTCTTCCCCCACATGATGTGGGGGTTTTTTTTATC
cheA(SL1344_1856)	ArcZ(ncRNA0002)	-	1975495	1975498	--	--	+	3511913	3511917	3511859	3511861	10	37.6693	8.47e-13	CDS	sRNA	TTCTTTCCGCAGAACATCAGGGCG	GATTTCCCTGGTGTTGGCGCAGTATTCGCGCACCCCGGTCAAACCGGGGTCATTTTTTT
cheA(SL1344_1856)	MgrR(ncRNA0043)	-	1976764	1976779	1976742	1976742	+	1550821	1550844	1550762	1550798	19	156.468	4.99e-34	CDS	sRNA	AGCGGAACCGAGGTGATAGCGTGAGCATGGATATTAGC	AGAATTTGCCCGGTAGCGTATAAGCAAAACACAAATCTATCCATGCAAGCATTTACCGCTGGTGAACCGGCGGTTTTTTTTTG
cheB(SL1344_1852).cheY(SL1344_1851).IGR	ArcZ(ncRNA0002)	-	1970265	1970310	1970244	1970244	+	3511915	3511918	3511860	3511863	42	160.882	3.54e-71	IGR	sRNA	GGTAAGCCAGCAGATGTTGGCGAAAATCAGTGCCGGACAGGCGATACGTATTTGAACCAGGAGTAGT	ATTTCCCTGGTGTTGGCGCAGTATTCGCGCACCCCGGTCAAACCGGGGTCATTTTTTTT
cheM(SL1344_3189)	ArcZ(ncRNA0002)	-	3403018	3403109	3402995	3403074	+	3511882	3511921	3511860	3511866	873	1448.1	0	CDS	sRNA	TCTTCCTGTATGAGGATATGCAATCCCAGGGAGAAAATATGTTTTTGCATAACATTAAAATACGTTCAAAATTATTTATGGCCTTTGGCTTATTCATTGTTCTCATGGTGGTGAG	ATTTCCCTGGTGTTGGCGCAGTATTCGCGCACCCCGGTCAAACCGGGGTCATTTTTTTTCCG
cheM(SL1344_3189)	CyaR(ncRNA0009)	-	3403005	3403105	3402942	3402992	+	2228899	2228935	2228853	2228879	295	96.3706	1.29e-281	CDS	sRNA	CCTGTATGAGGATATGCAATCCCAGGGAGAAAATATGTTTTTGCATAACATTAAAATACGTTCAAAATTATTTATGGCCTTTGGCTTATTCATTGTTCTCATGGTGGTGAGTTCCGCTCTGTCTTTGTTTAGCCTTGATCGGGCTAATACGGGTATGCAGAACA	AACATAACCCATAAATGCTAGCTGTACCAGGAACCACCTCCTTGGCCTGCGTAATCTCCCTTACGCAGGCTTATTTTTTGCGT
cheW(SL1344_1855)	DapZ(ncRNA0010)	-	1974237	1974250	1974180	1974188	+	74922	74924	74846	74846	11	29.9387	3.1e-13	3UTR	sRNA	GCTGGATATCGCAGCATCACACGTCGCGTAATAACGTTGCCGGATGGCGTCGCGCCATCCGGCAATATTCA	AAATACCTTCGTGATGTGGTTGTGGTAATCAAGATTAATTGATTACAAAGGGCAATATATTATTGCCCTTTTGTTTTTG
cheW(SL1344_1855)	InvR(ncRNA0023)	-	1974715	1974729	1974679	1974689	+	3067545	3067586	3067504	3067523	14	5.38624	1.1e-06	CDS	sRNA	AATAATATGACCGGTATGAGTAATGTAAGCAAACTGGCCGGCGAGCCGTCA	TTTTACGGTTGGCCATTTGTCTCTTACGTTGCATTTATCAATCTGCTTTTTGATACAGCAGCACCTCGCTGCTGCTTTTTTTA
ChiX(ncRNA0003)	celA(SL1344_1247).celB(SL1344_1248).IGR	+	555491	555520	555550	555573	+	1349016	1349108	1348982	1348993	24	14.5951	1.68e-19	sRNA	IGR	AGATCCGAAGCGAAAGCGTCGGGATAATAATAACGATGAAATTCCTCTTTGACGGGCCAATAGCGATATTGGCCATTTTTTTA	ATTTTTTAATTTTTCCCGTCAAAGAGTTATTTCATACACTAACCGCAATATTTTATTGCGGTATTTAAGGGTATTTTTCTATGAGTAACGTTATTGCTTCACTTGAAAAGGTACTCCTTCCTTTTGC
clcA(SL1344_0204)	ArcZ(ncRNA0002)	+	240029	240078	240097	240100	+	3511913	3511918	3511859	3511866	60	3447.88	1e-136	CDS	sRNA	GGAACAGGCGGCGAAAAACCAGAATGCGCCTGCGGACGAGAATACTTGAACGAATTACCAGGGTATTAGATA	GATTTCCCTGGTGTTGGCGCAGTATTCGCGCACCCCGGTCAAACCGGGGTCATTTTTTTT
clpA(SL1344_0884)	FnrS(ncRNA0013)	+	981490	981536	981549	981561	-	1706781	1706786	1706822	1706827	33	23.1969	1.54e-31	3UTR	sRNA	AAGCCGGAAGCCGCGCACTAATCTTCGTTTCACTGTCGTACAAACCGGGCCTTAGCGCCCGGTTTTTTTGTC	CAATTGATTCGTACGACGCCGACTTAGATTAGTCGGCTTTTTTTTGC
clpP(SL1344_0442)	ArcZ(ncRNA0002)	+	502632	502674	502693	502694	+	3511914	3511920	3511859	3511861	10	45.0555	1.72e-13	5UTR	sRNA	AATCCGTCCATCAGGTTACAATCAGTACAGCAGATTTTTTCAATTTTTATCCAGGAGACGGAA	GATTTCCCTGGTGTTGGCGCAGTATTCGCGCACCCCGGTCAAACCGGGGTCATTTTTTTTCC
cls(SL1344_1670)	ArcZ(ncRNA0002)	+	1790641	1790673	1790696	1790700	+	3511915	3511918	3511860	3511863	49	866.329	1.25e-103	CDS	sRNA	ATTCATACCATTGCTTCCGGTCCTGGATTTCCGGAAGATCTCATTCACCAGGCACTATTA	ATTTCCCTGGTGTTGGCGCAGTATTCGCGCACCCCGGTCAAACCGGGGTCATTTTTTTT
cpxR(SL1344_4008)	ArcZ(ncRNA0002)	-	4291687	4291757	4291661	4291669	+	3511913	3511918	3511859	3511862	39	110.648	2.21e-41	CDS	sRNA	ATGACAGCATCGATTTACTTTTGCTTGACGTCATGATGCCGAAGAAAAACGGTATCGATACGTTGAAAGCGCTTCGCCAGACACACCAGACGCCTGT	GATTTCCCTGGTGTTGGCGCAGTATTCGCGCACCCCGGTCAAACCGGGGTCATTTTTTTT
crRNA2(ncRNA0006)	Spf(ncRNA0075)	-	3117732	3117763	3117696	3117715	+	4230588	4230612	4230544	4230544	10	18.8486	1.17e-09	sRNA	sRNA	GCTGACAAAAAGTAGTTTATAAACAATTATATCCGTTTAGTGTGTTCCCCGCGCCAGCGGGGATAAAC	ACTTCACGTAATCGGATTTGGCTGAATATTTTAGCCGCCCCAGTCAGTTTATGACTGGGGCGTTTTTTA
cspD(SL1344_0882)	ArcZ(ncRNA0002)	-	978413	978447	978383	978397	+	3511895	3511919	3511859	3511863	629	563.57	0	CDS	sRNA	GTTACAGAACGCTTAAAGCCGGACAGTCTGTCCGGTTTGATGTCCACCAGGGGCCAAAAGGCAAT	GATTTCCCTGGTGTTGGCGCAGTATTCGCGCACCCCGGTCAAACCGGGGTCATTTTTTTTC
cspD(SL1344_0882)	STnc870(ncRNA0205)	-	978578	978590	978548	978551	+	4292591	4292599	4292540	4292542	16	499.342	6.4e-37	5UTR	sRNA	CTTATATAAGATTTACGAAGGATGTCGAAGCATGGAAACGGGT	GTTTTCCTTGCCATAGACACCATCCCTGTCTTCCCCCACATGATGTGGGGGTTTTTTTTA
csrA(SL1344_2806)	STnc1920(ncRNA0276)	-	2993727	2993732	--	--	+	2756628	2756648	2756586	2756587	15	2277.84	3.53e-45	5UTR	sRNA	TAATCTTTCAAGGAGCAAAGAATGCT	TTTATGCATTTCTGAAACTCCCCCGCAGGTAAGCTCCTTTTCCCTCCTGCGGGAATTTTTTAT
cstA(SL1344_0588)	ArcZ(ncRNA0002)	+	660751	660761	660782	660782	+	3511913	3511919	3511860	3511862	33	474	3.23e-66	CDS	sRNA	GACAACAACTATGAATAAATCAGGGAAATACC	ATTTCCCTGGTGTTGGCGCAGTATTCGCGCACCCCGGTCAAACCGGGGTCATTTTTTTTC
cyaA(SL1344_3894)	ArcZ(ncRNA0002)	+	4167826	4167887	4167907	4167913	+	3511914	3511920	3511860	3511862	91	191.939	2.2e-157	5UTR	sRNA	TATTTTTGACATACGGTTTATCCCGAATGGCGACGGTCAAGTACTGACCTGCACCATGACGGGTAGCAACATCAGGCGATACGTCTTG	ATTTCCCTGGTGTTGGCGCAGTATTCGCGCACCCCGGTCAAACCGGGGTCATTTTTTTTCC
CyaR(ncRNA0009)	ArcZ(ncRNA0002)	+	2228843	2228886	2228884	2228932	+	3511881	3511920	3511859	3511880	2608	5.09792	0	sRNA	sRNA	CGCGCTGAAAAACATAACCCATAAATGCTAGCTGTACCAGGAACCACCTCCTTGGCCTGCGTAATCTCCCTTACGCAGGCTTATTTTTTG	GATTTCCCTGGTGTTGGCGCAGTATTCGCGCACCCCGGTCAAACCGGGGTCATTTTTTTTCC
CyaR(ncRNA0009)	DapZ(ncRNA0010)	+	2228846	2228905	2228918	2228931	+	74870	74925	74845	74855	122	16.7712	3.87e-20	sRNA	sRNA	GCTGAAAAACATAACCCATAAATGCTAGCTGTACCAGGAACCACCTCCTTGGCCTGCGTAATCTCCCTTACGCAGGCTTATTTTTT	TAAATACCTTCGTGATGTGGTTGTGGTAATCAAGATTAATTGATTACAAAGGGCAATATATTATTGCCCTTTTGTTTTTGC
cycA(SL1344_4331)	GcvB(ncRNA0014)	+	4655388	4655456	4655425	4655494	+	3156939	3156985	3156896	3156924	27	64.1048	2.54e-36	CDS	sRNA	TAGAGCCCGCACAACACAGACAGGTACAGGAAGAAAAACATGGTAGATCAGGTAAAAGTCGCAGCCGACGAACAGGCTCCGGCTGAACAGTCGCTACGGCGCAATCT	CGAGACTACCCTTTTTCACTTCCTGTACATTTACCCTGTCTGTCCATAGTGATTAATGTAGCACCGCCATATTGCGGTGCTTTTTTTTGT
cycA(SL1344_4331)	GcvB(ncRNA0014)	+	4655338	4655387	4655400	4655430	+	3156931	3156986	3156845	3156928	127	178.071	6.58e-204	5UTR	sRNA	ATATCGATGAGTCCTGATAACAGGATCGTCGTATCATAGACCAAAGGCCGTAGAGCCCGCACAACACAGACAGGTACAGGAAGAAAAACATGG	TGATGTTGTGTTGTTGTGTTTGCAATTGGTCTGCGATTCAGACCACGGTAGCGAGACTACCCTTTTTCACTTCCTGTACATTTACCCTGTCTGTCCATAGTGATTAATGTAGCACCGCCATATTGCGGTGCTTTTTTTTGTA
cydA(SL1344_0722)	STnc870(ncRNA0205)	+	808788	808917	808936	808941	+	4292566	4292600	4292538	4292542	59	158.827	2.6e-61	5UTR	sRNA	TAACATGTTTGTAACTTTTCATCATTACTGTTTCCTTCCCGAGGGGATAGTACGATGGAAGGCCGCAAATAAATTTGTATTGGGGCATGCGTGTGACCCTTTCTAACGGGGTTCACTCTCGGAGTCTTCATGCGATGAGCAAGGAGTCATGATG	CTGTTTTCCTTGCCATAGACACCATCCCTGTCTTCCCCCACATGATGTGGGGGTTTTTTTTAT
cysB(SL1344_1645)	ArcZ(ncRNA0002)	-	1765813	1766207	1765840	1766132	+	3511915	3511919	3511854	3511865	40	45.3146	3.29e-35	CDS	sRNA	TGTTGAAGTGGTTAATCATAACCTTAACGTCTCCTCTACCGCTGAGGGGTTGTATACTTCCCAGCCGGGGATCAGCAAGCAGGTTCGGATGCTGGAAGATGAGCTTGGCATCCAGATTTTCGCCCGCAGTGGTAAGCATCTGACTCAGGTGACGCCCGCAGGTCAGGAGATTATTCGTATTGCGCGTGAGGTGCTTTCCAAAGTCGATGCCATTAAGTCGGTCGCCGGCGAGCACACCTGGCCGGATAAAGGCTCGCTCTATATTGCCACTACCCATACTCAGGCGCGTTATGCATTGCCAGGCGTGATTAAAGGCTTCATCGAGCGTTACCCGCGCGTTTCGCTGCATATGCACCAGGGGTCGCCAA	GCCACGATTTCCCTGGTGTTGGCGCAGTATTCGCGCACCCCGGTCAAACCGGGGTCATTTTTTTTC
cysM(SL1344_2403)	MgrR(ncRNA0043)	-	2549214	2549312	2549188	2549213	+	1550821	1550844	1550793	1550806	37	75.2534	2.59e-54	3UTR	sRNA	CGGGAATATCCTGCCGATTTTCTATGTGCGCCAGCGCATTACCGCCGCCTTTTATAATAAAAGCTCGTCTGTTGTTCTTATTGTTGTATTTGTTCCTGGCAAAGCGTCATGTAATGCTTGCTGCT	CAAATCTATCCATGCAAGCATTTACCGCTGGTGAACCGGCGGTTTTTTTTTG
cysS(SL1344_0530)	ArcZ(ncRNA0002)	+	600011	600053	600076	600077	+	3511915	3511917	3511859	3511862	11	21.6036	1.55e-11	3UTR	sRNA	CTTTTACAGGCCGCTCTATTTGCATAGAACGGCCTGTTTTTTATTTTTTCGCACCGGGCGAAAGATA	GATTTCCCTGGTGTTGGCGCAGTATTCGCGCACCCCGGTCAAACCGGGGTCATTTTTTT
cytR(SL1344_4043)	ArcZ(ncRNA0002)	-	4324693	4324704	4324658	4324661	+	3511915	3511917	3511859	3511862	18	81.1042	4.05e-27	5UTR	sRNA	GTTTTCGATGAGTGTTACCAGGGATAGATCTGCGCCAGCAGTTCCCA	GATTTCCCTGGTGTTGGCGCAGTATTCGCGCACCCCGGTCAAACCGGGGTCATTTTTTT
cytR(SL1344_4043)	ArcZ(ncRNA0002)	-	4323961	4323966	--	--	+	3511916	3511917	3511857	3511861	11	27.7761	1.25e-12	CDS	sRNA	CTTTACCTTTGAAGCCGGGGCAAACG	ACGATTTCCCTGGTGTTGGCGCAGTATTCGCGCACCCCGGTCAAACCGGGGTCATTTTTTT
dacA(SL1344_0625)	RprA(ncRNA0058)	-	697850	697898	697805	697816	-	1401682	1401686	1401731	1401732	10	930.065	1.65e-26	3UTR	sRNA	GGTTTGGATAAAAATTGAACGCTTGAAAGTGTGATTTTCGTCCCCATATACTATGCATCAGTAAAACTCCCGCCCTGTGGCGGGAGTTGTTATT	GAATTGCTGTGTGTAGTCTTTGCCCGTCTCCTACGATGGGCTTTTTTTTTA
dapA(SL1344_2452)	GcvB(ncRNA0014)	-	2602158	2602171	2602132	2602138	+	3156946	3156985	3156919	3156924	19	26.9557	4.02e-20	CDS	sRNA	AATATTATCGCTATCAAAGAGGCGACAGGGAACTTAACCC	TGTACATTTACCCTGTCTGTCCATAGTGATTAATGTAGCACCGCCATATTGCGGTGCTTTTTTTTGT
dctA(SL1344_3579)	ArcZ(ncRNA0002)	-	3812120	3812343	3812102	3812102	+	3511913	3511920	3511859	3511861	29	43.2549	1.75e-20	CDS	sRNA	AGTTTTTCGCAGGTCATTTTCGGCATCATCAATATGATCATGCGCCTGGCGCCGATTGGCGCATTCGGCGCGATGGCCTTCACCATCGGTAAATACGGCGTCGGTTCTCTGGTGCAACTGGGGCAGCTCATTATCTGCTTCTATATCACCTGTATTCTCTTCGTGGTGGTGGTGCTGGGGACGATTGCACGGGTAACGGGCTTTAGCATTTTTAAATTTATTCGCTATATCCGGGAAGAATT	GATTTCCCTGGTGTTGGCGCAGTATTCGCGCACCCCGGTCAAACCGGGGTCATTTTTTTTCC
dctA(SL1344_3579)	MgrR(ncRNA0043)	-	3812160	3812166	3812133	3812133	+	1550818	1550843	1550762	1550766	15	86.1768	9.62e-24	CDS	sRNA	GGGACGATTGCACGGGTAACGGGCTTTAGCATTT	AGAATTTGCCCGGTAGCGTATAAGCAAAACACAAATCTATCCATGCAAGCATTTACCGCTGGTGAACCGGCGGTTTTTTTTT
dcuA(SL1344_4262)	ArcZ(ncRNA0002)	-	4591295	4591407	4591271	4591339	+	3511913	3511918	3511860	3511863	196	256.475	2.98e-210	CDS	sRNA	ATAGTTGTCGAACTTATCATTGTTTTGCTGGCAATCTTTTTGGGCGCCAGACTTGGGGGCATCGGTATTGGATTCGCAGGTGGGCTGGGTGTTCTGGTACTTGCCGCCATCGGCGTGAAGCCAGGGACAATTCCATT	ATTTCCCTGGTGTTGGCGCAGTATTCGCGCACCCCGGTCAAACCGGGGTCATTTTTTTT
dcyD(SL1344_1882)	GcvB(ncRNA0014)	-	2000632	2000649	2000569	2000613	+	3156827	3156985	3156800	3156839	48	292.748	5.38e-39	CDS	sRNA	AACGTGCATAATAAAAAGAACACACCACAACGTTACCGGAGGCTCAATGCCACTACATCACTTAACGCGCTTCCCTCGCCT	GTTTTATCGGAATGCGTGTTCTGATGGGCTTTTGGCTTACGGTTGTGATGTTGTGTTGTTGTGTTTGCAATTGGTCTGCGATTCAGACCACGGTAGCGAGACTACCCTTTTTCACTTCCTGTACATTTACCCTGTCTGTCCATAGTGATTAATGTAGCACCGCCATATTGCGGTGCTTTTTTTTGT
deoB(SL1344_4496).deoD(SL1344_4497).IGR	STnc870(ncRNA0205)	+	4845702	4845711	4845732	4845735	+	4292591	4292600	4292541	4292545	30	735.076	3.93e-72	IGR	sRNA	ATTTAAAGGGAACTGAAGATGGCAACTCCACATA	TTTTCCTTGCCATAGACACCATCCCTGTCTTCCCCCACATGATGTGGGGGTTTTTTTTAT
deoR(SL1344_0840)	ArcZ(ncRNA0002)	-	936783	936808	936759	936769	+	3511913	3511918	3511860	3511861	49	388.354	2.96e-95	5UTR	sRNA	GCGCTCTGTATGGTGCGGAGCGCTTATTTAACTCTCCAGGGGAACTATGG	ATTTCCCTGGTGTTGGCGCAGTATTCGCGCACCCCGGTCAAACCGGGGTCATTTTTTTT
djlA(SL1344_0095)	ArcZ(ncRNA0002)	+	108392	108426	108446	108450	+	3511914	3511920	3511859	3511862	129	689.89	7.9e-265	CDS	sRNA	AGCCTCACCGATAGCGTAACGTTTTGGGGAGTCTATGCAGTACTGGGGAAAGATAATTG	GATTTCCCTGGTGTTGGCGCAGTATTCGCGCACCCCGGTCAAACCGGGGTCATTTTTTTTCC
dksA(SL1344_0187)	InvR(ncRNA0023)	-	216853	216898	216818	216856	+	3067549	3067588	3067499	3067518	23	10.2983	2.98e-15	CDS	sRNA	GATTTTCCCCCGAACATGGGGATCGATAGTGCGTGTTAAGGAGAAGCAACATGCAAGAAGGGCAAAACCGTAAAACATCGT	GTCACTTTTACGGTTGGCCATTTGTCTCTTACGTTGCATTTATCAATCTGCTTTTTGATACAGCAGCACCTCGCTGCTGCTTTTTTTATT
dmsA1(SL1344_1429).AS	ArcZ(ncRNA0002)	+	1533731	1533760	1533801	1533802	+	3511915	3511918	3511860	3511862	21	1608.6	4.72e-47	Antisense	sRNA	AAAGAGTTTTAAATGTCGTTGTGTTCGCAAAACGGGGAGCTCCGGGCGCGTAAAAACGTCCCGGAGCAGGCG	ATTTCCCTGGTGTTGGCGCAGTATTCGCGCACCCCGGTCAAACCGGGGTCATTTTTTTT
dnaG(SL1344_3184)	ArcZ(ncRNA0002)	+	3395853	3395870	3395888	3395903	+	3511913	3511918	3511860	3511861	12	24.8417	4.04e-13	CDS	sRNA	TGATTGGTTTTGGCGGTCGAGTACTGGGGAACGACACGCCGAAATACCTTA	ATTTCCCTGGTGTTGGCGCAGTATTCGCGCACCCCGGTCAAACCGGGGTCATTTTTTTT
dnaN(SL1344_3804)	Spf(ncRNA0075)	-	4064926	4064952	4064904	4064904	+	4230589	4230612	4230539	4230543	23	29.8051	4.88e-24	CDS	sRNA	AACATTGTCGTCGTGATCCTATGAAATTTACCGTTGAACGTGAACATTT	CTTTTACTTCACGTAATCGGATTTGGCTGAATATTTTAGCCGCCCCAGTCAGTTTATGACTGGGGCGTTTTTTA
dsbC(SL1344_3019)	ArcZ(ncRNA0002)	-	3224729	3224740	3224705	3224705	+	3511914	3511918	3511856	3511862	22	266.086	2.31e-41	CDS	sRNA	AGAGATGAAAGATTATAACGCGCTGGGGATCACGGT	CACGATTTCCCTGGTGTTGGCGCAGTATTCGCGCACCCCGGTCAAACCGGGGTCATTTTTTTT
emrA(SL1344_2799)	STnc870(ncRNA0205)	+	2984405	2984513	2984522	2984543	+	4292570	4292600	4292540	4292561	228	9138.35	0	CDS	sRNA	GCAAACGCAAAACAGCGCTGCTACTTCTTACCTTGCTCTTTGTTATTATTGCCGTGGCATATGGAATTTATTGGTTTTTAGTATTGCGTCATATTGAAGAGACAGATGATGCTTACGTGGCAGGGAACCAGGTTCAAAT	GTTTTCCTTGCCATAGACACCATCCCTGTCTTCCCCCACATGATGTGGGGGTTTTTTTTAT
emrD(SL1344_3766)	CyaR(ncRNA0009)	+	4020997	4021042	4021052	4021060	+	2228928	2228932	2228863	2228874	14	64.8718	2.78e-20	CDS	sRNA	CGAAATGAAAAGGCAGAGAAACGTCAATTTGTTGTTGATGTTGGTGTTACTGGTGGCCGTAGGG	ATAAATGCTAGCTGTACCAGGAACCACCTCCTTGGCCTGCGTAATCTCCCTTACGCAGGCTTATTTTTTG
emrD(SL1344_3766)	GcvB(ncRNA0014)	+	4020937	4020939	4020969	4020969	+	3156953	3156984	3156907	3156909	11	9.99726	3.96e-08	5UTR	sRNA	GCATTTATGGGAATGCGCAGCAAGTTATTCTTA	TTTTTCACTTCCTGTACATTTACCCTGTCTGTCCATAGTGATTAATGTAGCACCGCCATATTGCGGTGCTTTTTTTTG
emrD(SL1344_3766)	SdsR(ncRNA0070)	+	4020936	4020941	--	--	-	1925619	1925630	1925687	1925700	110	6149.4	0	5UTR	sRNA	CGCATTTATGGGAATGCGCAGCAAGT	AATGCCAACTTTTAGCGCACGGCTCTCTCCCAAGAGCCATTTCCCTGGACCGAATACAGGAATCGTATTCGGTCTCTTTTTA
emrR(SL1344_2798)	MgrR(ncRNA0043)	+	2983641	2983686	2983702	2983715	+	1550835	1550844	1550780	1550797	61	579.971	2.04e-132	CDS	sRNA	CTTTATTTGTCACTGTCGTTACTATATCGGCTGAAATTAATGAGGTCATGCCCAAATGGATAGTTCGTTTACGCC	TATAAGCAAAACACAAATCTATCCATGCAAGCATTTACCGCTGGTGAACCGGCGGTTTTTTTTTG
envF(SL1344_1179).SL1344_1177(SL1344_1177).IGR	ArcZ(ncRNA0002)	-	1284880	1284966	1284877	1284879	+	3511913	3511917	3511859	3511863	24	2.75744e+06	4.38e-29	IGR	sRNA	AGCGAATCGCTATTTCATTCTCTGACACTGTAATTTTTCGTACTCAAGATGTTTATTTATTGAGTCTTTTGTGGATAACCAGGTGAAGTT	GATTTCCCTGGTGTTGGCGCAGTATTCGCGCACCCCGGTCAAACCGGGGTCATTTTTTT
fabA(SL1344_1007)	MgrR(ncRNA0043)	-	1114169	1114312	1114145	1114245	+	1550827	1550845	1550765	1550804	142	181.362	3e-202	3UTR	sRNA	GGTGAGGTTCTGGTGGATGGTCGTCTGATCTATACCGCACACGATTTGAAAGTCGGTTTGTTCCAGGATACTTCCGCGTTCTAAGTGTTGAATTGATATTCCGCGCTATCGGTATCATGCTTGCAAAGCCCATAAAGGCGAAACCTCCGCACTGCGGAGGTTTCTTTT	ATTTGCCCGGTAGCGTATAAGCAAAACACAAATCTATCCATGCAAGCATTTACCGCTGGTGAACCGGCGGTTTTTTTTTGC
fabZ(SL1344_0228)	STnc870(ncRNA0205)	+	266493	266566	266527	266659	+	4292588	4292599	4292541	4292563	93	249.23	1.13e-181	CDS	sRNA	ATTATTGCCTTTTTGTATATTTGGACAGGAAGAGTATTTTGACTACTAACACTCATACTCTGCAGATTGAAGAGATTTTAGAGCTTCTGCCGCACCGTTTTCCGTTTTTACTGGTCGATCGCGTGCTGGACTTTGAAGAAGGTCGTTTTCTGCGTGCGGTGAAAAAT	TTTTCCTTGCCATAGACACCATCCCTGTCTTCCCCCACATGATGTGGGGGTTTTTTTTA
fadL(SL1344_2360)	RybD(ncRNA0062)	+	2500196	2500311	2500333	2500336	+	807425	807432	807391	807394	31	278.922	6.04e-29	CDS	sRNA	GTTAAACGAATTTTCTTCCTCTGGCCTTGGCCGGGCCTATTCGGGTGAAGGCGCAATCGCAGATGATGCGGGTAACGTTAGCCGCAACCCGGCGTTAATTACCATGTTTGACCGCCCGACGTTTTCAGCGGGCGCGGTTTA	GTTTTCGACATGGTTGGCCACCTTTACGGTGGCCTTTTTTAT
fadR(SL1344_1733)	ArcZ(ncRNA0002)	-	1863123	1863139	1863088	1863099	+	3511914	3511917	--	--	13	56.363	3.14e-18	CDS	sRNA	ATTTCTACTATCTTTATTCGTACCGCGTTGCGTCAACACCCGGATAAGGCGC	CGGTCAAACCGGGGTCATTTTTTT
fdoH(SL1344_3983)	ArcZ(ncRNA0002)	-	4266124	4266137	4266099	4266101	+	3511914	3511918	3511859	3511861	25	45.5963	1.15e-31	CDS	sRNA	GGTTTCACCCCCGCGCCCCAGGCGCGGGACCACCAGGAA	GATTTCCCTGGTGTTGGCGCAGTATTCGCGCACCCCGGTCAAACCGGGGTCATTTTTTTT
Ffs(ncRNA0012)	SL1344_0994(SL1344_0994)	+	523988	524003	524024	524025	-	1098806	1098808	1098842	1098842	16	13.3993	2.77e-13	4.5S_RNA	CDS	GCGTGTGCCGGGATGTAGCTGGCAGGGCCCCCACCCAT	GGGGGGGCGGAGGTTCAAATCCTCTCGTGCCGACCAA
fhlA(SL1344_2839)	RybD(ncRNA0062)	+	3026229	3026268	3026293	3026293	+	807427	807432	807392	807395	18	358.65	1.85e-38	5UTR	sRNA	ATTCATTTACCGTTTTCGCACCGTTTTGCGGTATTTTCCTGGAAAAGCAACATGTCGTATACACC	TTTTCGACATGGTTGGCCACCTTTACGGTGGCCTTTTTTAT
fklB(SL1344_4330).AS	ArcZ(ncRNA0002)	-	4655113	4655168	4655083	4655090	+	3511914	3511918	3511859	3511866	98	1325.4	2.01e-212	Antisense	sRNA	AAGGCGTTTACGCCATCATCCGGCAAACCCGGGGCGCTTACAGAATTTCCAGCAGTTCCACTTCAAACACCAGGGTGCTGAATGGC	GATTTCCCTGGTGTTGGCGCAGTATTCGCGCACCCCGGTCAAACCGGGGTCATTTTTTTT
fkpA(SL1344_3420)	RprA(ncRNA0058)	-	3627345	3627388	3627320	3627320	-	1401683	1401687	1401731	1401732	12	956.882	1.15e-31	5UTR	sRNA	ATGTACCTCTTTATGTTGTCTCCGTCGGCGGATTCTACTTAACTTTACCGGCTTTCACAGCAACCATTA	GAATTGCTGTGTGTAGTCTTTGCCCGTCTCCTACGATGGGCTTTTTTTTT
flgK(SL1344_1120)	CyaR(ncRNA0009)	+	1222691	1222706	1222732	1222735	+	2228930	2228932	2228863	2228863	10	24.875	3.54e-11	CDS	sRNA	GGATTATAAGATTGTTTTTGACGGTACAGACTGGCAGGTTACTCG	ATAAATGCTAGCTGTACCAGGAACCACCTCCTTGGCCTGCGTAATCTCCCTTACGCAGGCTTATTTTTTG
flgK(SL1344_1120)	DapZ(ncRNA0010)	+	1222650	1222666	1222691	1222691	+	74922	74923	74845	74847	10	351.252	1.55e-22	CDS	sRNA	CTAACCGCTAAGGTGGTCGACAGCACGAAGGTTCAGGCAACG	TAAATACCTTCGTGATGTGGTTGTGGTAATCAAGATTAATTGATTACAAAGGGCAATATATTATTGCCCTTTTGTTTTT
flhD(SL1344_1860)	ArcZ(ncRNA0002)	-	1979558	1979593	1979536	1979536	+	3511916	3511919	3511861	3511863	14	15.4665	1.89e-12	CDS	sRNA	ATGACATCAATTTGTCATATTTACTCCTTGCACAGCGTTTGATCGTCCAGGACAAAGC	TTTCCCTGGTGTTGGCGCAGTATTCGCGCACCCCGGTCAAACCGGGGTCATTTTTTTTC
flhD(SL1344_1860)	ArcZ(ncRNA0002)	-	1979671	1979792	1979649	1979714	+	3511883	3511919	3511809	3511867	2274	1008.92	0	5UTR	sRNA	TGTAAGGCGAATCTCAGTGGGAGGCTGCGTTATACGTCACAATGTCCATAATGTCTGAGCGCTGCTATGCATTTGACCTTTTTGCTTCTTTTACCGGGCCTTCCCGGCGACATCACGGGGTGCGGCTACGTCGCACAAAAATAA	AAAACAGGACTGCGCCTTTGACATCATCATAATAAGCACGGCGCAGCCACGATTTCCCTGGTGTTGGCGCAGTATTCGCGCACCCCGGTCAAACCGGGGTCATTTTTTTTC
fliC(SL1344_1888)	CyaR(ncRNA0009)	-	2005724	2005785	2005680	2005737	+	2228923	2228933	2228863	2228878	27	39.6345	1.24e-32	CDS	sRNA	ATGTCTTATACTGATAATAACGGTAAAACTATTGATGGTGGTTTAGCAGTTAAGGTAGGCGATGATTACTATTCTGCAACTCAAAATAAAGATGGTTCCATAAGTA	ATAAATGCTAGCTGTACCAGGAACCACCTCCTTGGCCTGCGTAATCTCCCTTACGCAGGCTTATTTTTTGC
fliC(SL1344_1888)	STnc870(ncRNA0205)	-	2005757	2005779	2005719	2005739	+	4292570	4292600	4292540	4292545	13	118.221	8.24e-23	CDS	sRNA	TATACTGATAATAACGGTAAAACTATTGATGGTGGTTTAGCAGTTAAGGTAGGCGATGATT	GTTTTCCTTGCCATAGACACCATCCCTGTCTTCCCCCACATGATGTGGGGGTTTTTTTTAT
fliD(SL1344_1889)	InvR(ncRNA0023)	+	2007670	2007678	2007702	2007715	+	3067558	3067587	3067499	3067513	12	20.1053	1.84e-11	CDS	sRNA	CGACATTGAGCGTCAGAGCAATACCGTAACCGACGCCCCTCAGGGA	GTCACTTTTACGGTTGGCCATTTGTCTCTTACGTTGCATTTATCAATCTGCTTTTTGATACAGCAGCACCTCGCTGCTGCTTTTTTTAT
fliF(SL1344_1898)	ArcZ(ncRNA0002)	+	2014020	2014027	2014053	2014055	+	3511914	3511917	3511861	3511862	14	1608.53	9.79e-32	5UTR	sRNA	GTCAATTTTTCGAGTTTGCTGACCCGGGAGTGAGTC	TTTCCCTGGTGTTGGCGCAGTATTCGCGCACCCCGGTCAAACCGGGGTCATTTTTTT
fliY(SL1344_1883)	STnc870(ncRNA0205)	-	2001681	2001698	2001655	2001664	+	4292597	4292600	4292541	4292545	17	178.021	3.08e-32	5UTR	sRNA	CATAAGATGTAGCAGAGTCGTGTTGGTGAAACGTGGCAAACCTT	TTTTCCTTGCCATAGACACCATCCCTGTCTTCCCCCACATGATGTGGGGGTTTTTTTTAT
FnrS(ncRNA0013)	ahpF(SL1344_0597)	-	1706891	1706906	1706840	1706841	+	672321	672386	672295	672303	15	4.73834	1.85e-06	sRNA	3UTR	TCGCAGGTGAATGCAACGTCAAGCGATGGGCGTTGCGCTCCATATTGTCTTACTTCCTTTTTTGAAT	AAAATCGCATAAAAAGAAGTAAGCACACCTGCAAGGCCAGTTAACTGGCCATCGTAAATGGCCCGATAGTGTAAGCTATTCGGGCCTGCGGT
FnrS(ncRNA0013)	pepN(SL1344_0997)	-	1706871	1706906	1706840	1706848	+	1103115	1103141	1103079	1103086	61	27.4545	1.18e-59	sRNA	3UTR	TCGCAGGTGAATGCAACGTCAAGCGATGGGCGTTGCGCTCCATATTGTCTTACTTCCTTTTTTGAAT	ATCCGTTATAAAGAGGTAAGACATGCCCGGTAAGCGTTAGCGCTGCCGGGCATTTTTTTGCCG
FnrS(ncRNA0013)	STnc2000(ncRNA0278)	-	1706842	1706907	1706786	1706833	-	1204286	1204318	1204327	1204345	358	10.1499	4.88e-179	sRNA	sRNA	CTCGCAGGTGAATGCAACGTCAAGCGATGGGCGTTGCGCTCCATATTGTCTTACTTCCTTTTTTGAATTACTGCATAGCACAATTGATTCGTACGACGCCGACTTAGATTAGTCGGCTTTTT	CAATGAATAAAAAATGATATGCAGTGATGTATGTTTGCCGGGTCGCCCCGGCTTTTTTAT
FnrS(ncRNA0013)	STnc480(ncRNA0167)	-	1706837	1706906	1706783	1706825	-	587337	587371	587372	587449	74	3.32141	1.26e-17	sRNA	sRNA	TCGCAGGTGAATGCAACGTCAAGCGATGGGCGTTGCGCTCCATATTGTCTTACTTCCTTTTTTGAATTACTGCATAGCACAATTGATTCGTACGACGCCGACTTAGATTAGTCGGCTTTTTTTT	TACTCCAAAGACTGTAACCGCGACGTTATGATTTAACGGCGGGCAGCCCTCCTGATTATTTTTAATTTAGCTATGTTGGATTTTGCCACGGTGAGAACCGTGGCTTTTTTTAT
focA(SL1344_0911)	STnc2000(ncRNA0278)	-	1014713	1014758	1014680	1014680	-	1204288	1204294	1204326	1204335	10	566.66	9.9e-25	CDS	sRNA	TCTATCTGGCGATTACCGCCGGCGTATTCATTTCAATTGCCTTTGTTTTTTATATTACTGCGACAACCGGTACTGGCGC	AAAATGATATGCAGTGATGTATGTTTGCCGGGTCGCCCCGGCTTTTTT
folA(SL1344_0088)	ArcZ(ncRNA0002)	+	100816	100816	--	--	+	3511913	3511919	3511860	3511862	38	213.009	6.77e-68	5UTR	sRNA	TTTTTTTTGTATCAGGAAATA	ATTTCCCTGGTGTTGGCGCAGTATTCGCGCACCCCGGTCAAACCGGGGTCATTTTTTTTC
frr(SL1344_0220)	RprA(ncRNA0058)	+	257032	257063	257079	257090	-	1401682	1401687	1401727	1401735	56	3868.85	4.87e-170	5UTR	sRNA	CTATTGACGGGTCTTATTACCTGGCAGAAATTAAACGAGACTATACTTAGCACATCTTT	AACGAATTGCTGTGTGTAGTCTTTGCCCGTCTCCTACGATGGGCTTTTTTTTTA
fruR(SL1344_0118)	ArcZ(ncRNA0002)	+	138649	138676	138696	138701	+	3511916	3511918	3511860	3511861	21	102.676	3.64e-33	CDS	sRNA	ATAACGAAATGCGCTGCATTGAGCACCTTTTGCAACGCCAGGTGGATGCAATC	ATTTCCCTGGTGTTGGCGCAGTATTCGCGCACCCCGGTCAAACCGGGGTCATTTTTTTT
ftsY(SL1344_3536)	ArcZ(ncRNA0002)	-	3760615	3760670	3760592	3760595	+	3511914	3511917	3511860	3511863	10	49.9528	6.93e-14	CDS	sRNA	GATGGTTGGCGTGAACGGCGTGGGTAAAACCACCACTATCGGTAAACTGGCGCGCCAGTTTGAGCAGCAGGGTAAATCA	ATTTCCCTGGTGTTGGCGCAGTATTCGCGCACCCCGGTCAAACCGGGGTCATTTTTTT
galM(SL1344_0750)	ArcZ(ncRNA0002)	-	837015	837042	836993	836995	+	3511914	3511918	3511860	3511862	13	82.9789	4.31e-20	CDS	sRNA	TGAGTATCTGCCGGTAGATGAATCCGGTATTCCACGCCAGGGGCTAAAAT	ATTTCCCTGGTGTTGGCGCAGTATTCGCGCACCCCGGTCAAACCGGGGTCATTTTTTTT
galU(SL1344_1683)	ArcZ(ncRNA0002)	-	1805615	1805641	1805591	1805595	+	3511915	3511919	3511861	3511861	15	202.757	1.88e-27	5UTR	sRNA	CGATACAGATTAATGAACACGTTCAATACATGAACAGTCCAGGAGAATTTT	TTTCCCTGGTGTTGGCGCAGTATTCGCGCACCCCGGTCAAACCGGGGTCATTTTTTTTC
gcd(SL1344_0170)	STnc870(ncRNA0205)	-	200625	200645	200594	200611	+	4292576	4292600	4292540	4292552	62	98889.3	1.78e-197	5UTR	sRNA	TTGCTACTAAAAAATTAACAATTTGGGATGGTGTCTTTTTATGGCAGAAAAT	GTTTTCCTTGCCATAGACACCATCCCTGTCTTCCCCCACATGATGTGGGGGTTTTTTTTAT
GcvB(ncRNA0014)	asnA(SL1344_3844)	+	3156808	3156887	3156926	3156948	+	4106614	4106671	4106595	4106596	16	7.58261	1.36e-09	sRNA	CDS	GGAATGCGTGTTCTGATGGGCTTTTGGCTTACGGTTGTGATGTTGTGTTGTTGTGTTTGCAATTGGTCTGCGATTCAGACCACGGTAGCGAGACTACCCTTTTTCACTTCCTGTACATTTACCCTGTCTGTCCATAGTGAT	CAACAGGACGCAGGAGTAAAAAAATGAAAACCGCTTACATTGCCAAACAACGTCAAATTAGCTTCGTGAAATCACAT
GcvB(ncRNA0014)	mglB(SL1344_2167).mglA(SL1344_2166).IGR	+	3156827	3156887	3156945	3156952	-	2284194	2284204	2284225	2284227	14	53.8322	4.66e-19	sRNA	IGR	GCTTTTGGCTTACGGTTGTGATGTTGTGTTGTTGTGTTTGCAATTGGTCTGCGATTCAGACCACGGTAGCGAGACTACCCTTTTTCACTTCCTGTACATTTACCCTGTCTGTCCATAGTGATTAAT	TAATTAAAAAGGCCGACAGGGTATCATTATGGGC
GcvB(ncRNA0014)	mglB(SL1344_2167).mglA(SL1344_2166).IGR	+	3156888	3156920	3156942	3156946	-	2284189	2284204	2284226	2284226	10	74.1166	1.38e-15	sRNA	IGR	CACGGTAGCGAGACTACCCTTTTTCACTTCCTGTACATTTACCCTGTCTGTCCATAGTG	AATTAAAAAGGCCGACAGGGTATCATTATGGGCAGCAC
GcvB(ncRNA0014)	SL1344_1177(SL1344_1177)	+	3156798	3156884	3156948	3156948	+	1283548	1283552	1283520	1283521	16	123.046	3.98e-26	sRNA	CDS	AAGTTTTATCGGAATGCGTGTTCTGATGGGCTTTTGGCTTACGGTTGTGATGTTGTGTTGTTGTGTTTGCAATTGGTCTGCGATTCAGACCACGGTAGCGAGACTACCCTTTTTCACTTCCTGTACATTTACCCTGTCTGTCCATAGTGAT	TATGCCCCATATGGTCAGACAGGCGGTTTTTCC
GcvB(ncRNA0014)	thrL(SL1344_0001)	+	3156795	3156885	3156853	3156949	+	165	305	147	186	39	45.2496	6.93e-29	sRNA	CDS	GAAAAGTTTTATCGGAATGCGTGTTCTGATGGGCTTTTGGCTTACGGTTGTGATGTTGTGTTGTTGTGTTTGCAATTGGTCTGCGATTCAGACCACGGTAGCGAGACTACCCTTTTTCACTTCCTGTACATTTACCCTGTCTGTCCATAGTGATT	ATACAAGACAGACAAATAAAAATGACAGAGTACACAACATCCATGAACCGCATCAGCACCACCACCATTACCACCATCACCATTACCACAGGTAACGGTGCGGGCTGACGCGTACAGGAAACACAGAAAAAAGCCCGCACCTGAACAGTGCGGGCTTTT
GcvB(ncRNA0014)	thrL(SL1344_0001)	+	3156899	3156920	3156948	3156951	+	165	194	146	147	10	35.9353	9.92e-13	sRNA	5UTR	GACTACCCTTTTTCACTTCCTGTACATTTACCCTGTCTGTCCATAGTGATTAA	AATACAAGACAGACAAATAAAAATGACAGAGTACACAACATCCATGAAC
gdhA(SL1344_1234)	GcvB(ncRNA0014)	-	1336837	1336898	1336806	1336865	+	3156919	3156986	3156841	3156928	280	525.844	0	CDS	sRNA	ACTGCAAATACATATTCTGATAAAACGCAAATACAACCACATTAATATATAAGAGGTTTTTATATCTATGGATCAGACATGTTCTCTGGAATC	GTTGTGATGTTGTGTTGTTGTGTTTGCAATTGGTCTGCGATTCAGACCACGGTAGCGAGACTACCCTTTTTCACTTCCTGTACATTTACCCTGTCTGTCCATAGTGATTAATGTAGCACCGCCATATTGCGGTGCTTTTTTTTGTA
gidB(SL1344_3840)	ArcZ(ncRNA0002)	-	4102613	4102677	4102587	4102634	+	3511913	3511918	3511860	3511864	36	636.432	2.09e-74	CDS	sRNA	GTTGAATGATATGGTGAGCTGGTGCCACCATCTGCCGGGAGAGAAAGGGCGTTTTTATGCCTTAAAAGGGCAATTGCCAGGGGATGAAATT	ATTTCCCTGGTGTTGGCGCAGTATTCGCGCACCCCGGTCAAACCGGGGTCATTTTTTTT
gldA(SL1344_4058)	ArcZ(ncRNA0002)	-	4345232	4345255	4345211	4345213	+	3511914	3511917	3511860	3511861	11	315.954	7.4e-22	CDS	sRNA	GGAGAGAAATGTATGGATCGCATTATTCAGTCACCAGGTAAGTAT	ATTTCCCTGGTGTTGGCGCAGTATTCGCGCACCCCGGTCAAACCGGGGTCATTTTTTT
glmS(SL1344_3828)	ArcZ(ncRNA0002)	-	4090333	4090347	4090296	4090300	+	3511914	3511917	3511861	3511871	11	9.8735	3.66e-08	3UTR	sRNA	TAAGTACAAATGTAGTACCAGGCAGAAGGCCGTCGACAGACGGCCTTTTTTT	TTTCCCTGGTGTTGGCGCAGTATTCGCGCACCCCGGTCAAACCGGGGTCATTTTTTT
glmU(SL1344_3829).glmS(SL1344_3828).IGR	GlmZ(ncRNA0016)	-	4092229	4092364	4092191	4092220	+	4163357	4163400	4163267	4163350	44	62.7382	1.61e-45	IGR	sRNA	GATTTTGTAGGTCGGATAAGCGTCAGCGCCATCCGGCAGACCGGAGATGAGAGGATAAAATAATCCTCCGCTCCATGAGCAGTACTTATAAAAATAACCCCACTCTCTACAAGGCTCGGGGCGCCCGCAACGACGGGCATACAGGTCAGCGACAACGCATGGCGTAATGCCATA	CTTATCGTCCACTGACAGATGTCGCTTACGCCTCATCAAACACCCTGGACACAACGTTGAGTGAAGCACCCCTTTATGTTGTCATACAGACCTGTTTTGACGCCTGCCCCTTAACCGGGCAGGCGTTTTTTTAT
glnH(SL1344_0805)	MgrR(ncRNA0043)	-	896313	896375	896274	896282	+	1550830	1550844	1550789	1550797	35	262.086	7.14e-68	5UTR	sRNA	GTTTCACGCTTCTGTTAAAACAATGAGTTACATAATTGGCATGATTTTTTCATTACGCTACATGTTCTCGCAGGGGATCGCCCCGTGGATAGAAAAGGAAAT	AACACAAATCTATCCATGCAAGCATTTACCGCTGGTGAACCGGCGGTTTTTTTTTG
glnH(SL1344_0805)	MgrR(ncRNA0043)	-	896225	896312	896193	896276	+	1550825	1550844	1550759	1550796	25	63.0291	1.88e-35	CDS	sRNA	GTTCTCGCAGGGGATCGCCCCGTGGATAGAAAAGGAAATGCTATGAAGTCTCTATTAAAAGTTTCACTGGCTGCACTTACCCTGGCTTTTGCGGTGTCTTCGCACGCTGCGGATAAGAAA	GCAAGAATTTGCCCGGTAGCGTATAAGCAAAACACAAATCTATCCATGCAAGCATTTACCGCTGGTGAACCGGCGGTTTTTTTTTG
glnH(SL1344_0805).glnP(SL1344_0804).IGR	ArcZ(ncRNA0002)	-	895411	895479	895388	--	+	3511913	3511918	3511859	3511862	28	18.9237	1.46e-13	IGR	sRNA	CGGGCCTACAGCTCTTTCCGTGACGGATAAGACACTTTCCGCCATTTCCGCGCCGGATAGAGCATTTGACTATTTACACCACGGTAACAGGA	GATTTCCCTGGTGTTGGCGCAGTATTCGCGCACCCCGGTCAAACCGGGGTCATTTTTTTT
glnH(SL1344_0805).glnP(SL1344_0804).IGR	STnc800(ncRNA0200)	-	895418	895451	895385	895385	-	4236850	4236856	4236893	4236907	13	1406.16	1.01e-36	IGR	sRNA	AAGACACTTTCCGCCATTTCCGCGCCGGATAGAGCATTTGACTATTTACACCACGGTAACAGGAACG	TCAGGAGTTTTTGAGTTGCCGTGGAAACTTTCAGCCCATCCCAGGATGGGCTTTTTTC
glpA(SL1344_2253)	ArcZ(ncRNA0002)	+	2389539	2389554	2389578	2389578	+	3511913	3511918	3511860	3511862	36	47.5493	1.78e-45	CDS	sRNA	GATTATGCGGTCTGGAGAAGGAGCACCAGGATGAAATTTG	ATTTCCCTGGTGTTGGCGCAGTATTCGCGCACCCCGGTCAAACCGGGGTCATTTTTTTT
glpB(SL1344_2254)	InvR(ncRNA0023)	+	2390090	2390156	2390131	2390188	+	3067584	3067587	3067502	3067512	17	6.04768	1.74e-08	CDS	sRNA	GGAACTGGACGTACTGCGTGATAACCCGACGGAATTTCGCGCGGTCAATATTGCGCGTCTGCTTGATAACGAAGAAAAATGGCCACTGCTGTACGACGC	ACTTTTACGGTTGGCCATTTGTCTCTTACGTTGCATTTATCAATCTGCTTTTTGATACAGCAGCACCTCGCTGCTGCTTTTTTTAT
glpC(SL1344_2255)	ArcZ(ncRNA0002)	+	2392005	2392051	2392068	2392072	+	3511913	3511919	3511857	3511862	120	228.049	2.69e-213	5UTR	sRNA	CGCTCGGCTAAGTAAAAAGCGCCGGAGCCCCTCCGGCGCCATTACCCTACTCACCAGGGACGATTTTC	ACGATTTCCCTGGTGTTGGCGCAGTATTCGCGCACCCCGGTCAAACCGGGGTCATTTTTTTTC
glpC(SL1344_2255)	ArcZ(ncRNA0002)	+	2391743	2391750	2391782	2391790	+	3511915	3511918	--	--	12	53.0275	1.17e-16	CDS	sRNA	ACGCTTTACACGCTTGAACTGTTGCGGCAAATTCCGGGGCTTGAATTG	GGTCAAACCGGGGTCATTTTTTTT
glpE(SL1344_3492)	RprA(ncRNA0058)	-	3709888	3709912	3709862	3709866	-	1401682	1401687	1401731	1401733	35	8250.02	3.19e-114	5UTR	sRNA	CGTACACTGGGCGATAAAATGCCTTAATTGGCTTCACCGGCAATAATGAAA	CGAATTGCTGTGTGTAGTCTTTGCCCGTCTCCTACGATGGGCTTTTTTTTTA
glpF(SL1344_4036)	MgrR(ncRNA0043)	-	4318066	4318112	4318038	4318057	+	1550790	1550844	1550764	1550765	46	56.0787	9.96e-45	CDS	sRNA	ATTCCTCGGTACCGGGTTGTTGATTTTTTTCGGTGTGGGTTGTGTCGCTGCGCTTAAAGTTGCCGGAGCTACTTT	AATTTGCCCGGTAGCGTATAAGCAAAACACAAATCTATCCATGCAAGCATTTACCGCTGGTGAACCGGCGGTTTTTTTTTG
glpF(SL1344_4036)	OxyS(ncRNA0050)	-	4317850	4317910	4317825	4317835	-	4364303	4364322	4364350	4364356	62	13719.7	1.03e-226	CDS	sRNA	GACAAACGTAAAGTTGTTCCTTTTATTATTTCTCAAGTTGCCGGCGCCTTTTGCGCAGCGGCGTTAGTTTACGGGCTTTATTACAA	GAAATAACTAAAGCCAACGTGAACTTTTGCGGACCTCTGGTCCGCTTTTTTTTT
glpF(SL1344_4036)	Spf(ncRNA0075)	-	4318130	4318232	4318056	4318155	+	4230566	4230615	4230510	4230564	1045	43.8463	0	CDS	sRNA	AGTGTGCCTACAGGGCATCGTGGATGTCCATGACCTCCTCGCATACCAATAATCATTACATACTCTTCAGGATCCGATTATGAGTCAAACATCAACCTTAAAAGGCCAGTGCATTGCTGAATTCCTCGGTACCGGGTTGTTGATTTTTTTCGGTGTGGGTTGTGTCGCTGCGCTTAA	ACAGAGGTAAGATGTTCTATCTTTCAGACCTTTTACTTCACGTAATCGGATTTGGCTGAATATTTTAGCCGCCCCAGTCAGTTTATGACTGGGGCGTTTTTTATTG
glpF(SL1344_4036)	STnc890(ncRNA0207)	-	4318213	4318231	4318135	4318148	+	14750	14787	14706	14727	72	2906.51	1.16e-217	CDS	sRNA	GTGTGCCTACAGGGCATCGTGGATGTCCATGACCTCCTCGCATACCAATAATCATTACATACTCTTCAGGATCCGATTATGAGTCAAACATCAACCT	AAAATTCTTTGACGATTTGACTCGCTAATCTTTTCCCGTTGTATTTTTCTTCAGCCCGGGTGTATATCCGGGCTTTTTTCTG
glpF(SL1344_4036)	STnc890(ncRNA0207)	-	4318169	4318209	4318138	4318150	+	14748	14789	14706	14729	65	4834.36	1.16e-210	5UTR	sRNA	ATGTCCATGACCTCCTCGCATACCAATAATCATTACATACTCTTCAGGATCCGATTATGAGTCAAACATCAA	AAAATTCTTTGACGATTTGACTCGCTAATCTTTTCCCGTTGTATTTTTCTTCAGCCCGGGTGTATATCCGGGCTTTTTTCTGCC
glpG(SL1344_3491)	ArcZ(ncRNA0002)	-	3709393	3709457	3709372	3709384	+	3511914	3511922	3511860	3511864	65	159.36	1.41e-87	CDS	sRNA	AGCAATAATGTTGATGATTACTTCCTTTGCGAATCCTCGCGTGGCGCAGGCATTTGTTGATTACATGGCCACCCAGGGCGTCATTC	ATTTCCCTGGTGTTGGCGCAGTATTCGCGCACCCCGGTCAAACCGGGGTCATTTTTTTTCCGC
glpG(SL1344_3491)	STnc870(ncRNA0205)	-	3708729	3708785	3708693	3708699	+	4292596	4292599	4292542	4292543	10	185.025	1.03e-19	CDS	sRNA	AATTTACCTCCAGCGCGGCTTAATTATTTTTGCATTATTGTGGATAGTCGCTGGTTGGTTTGACTGGTTTGGCATGTCTATGGCGAACGGCGC	TTTCCTTGCCATAGACACCATCCCTGTCTTCCCCCACATGATGTGGGGGTTTTTTTTA
glpK(SL1344_4035)	ArcZ(ncRNA0002)	-	4316560	4317296	4316547	4317249	+	3511914	3511918	3511860	3511865	43	58.9781	2.49e-39	CDS	sRNA	GACAAAATTATGACTGAAAAAAAATATATCGTTGCGCTCGACCAGGGTACCACCAGCTCCCGCGCGGTCGTTATGGATCATGACGCGAATATCGTCAGCGTATCACAGCGTGAATTTGAGCAAATTTATCCTAAGCCAGGCTGGGTAGAACACGACCCGATGGAAATTTGGGCGTCCCAAAGCTCAACGCTGGTAGAAGTGCTGGCTAAGGCCGATATCAGTTCCGATCAGATTGCCGCTATCGGTATCACCAACCAACGTGAAACCGCGATCGTCTGGGAACGTGAAACCGGCAAACCGATATACAACGCTATTGTCTGGCAGTGCCGTCGTACCGCCGATATTTGCGAACAGCTTAAACGCGACGGCCTGGAAGATTACATCCGCGACAATACCGGT…	ATTTCCCTGGTGTTGGCGCAGTATTCGCGCACCCCGGTCAAACCGGGGTCATTTTTTTT
glpQ(SL1344_2251)	ArcZ(ncRNA0002)	-	2385813	2385902	2385776	2385850	+	3511916	3511917	3511860	3511862	14	33.5109	1.02e-16	CDS	sRNA	TGATTTCCGCATTCATACCTTTGAAGAGGAAATTGAATTCGTTCAGGGATTAAATCACTCTACCGGTAAAAATATCGGTATTTATCCGGAAATTAAAGCGCCGTGGTTCCATCATCAGGAAGGGAAA	ATTTCCCTGGTGTTGGCGCAGTATTCGCGCACCCCGGTCAAACCGGGGTCATTTTTTT
glpQ(SL1344_2251)	RybD(ncRNA0062)	-	2385230	2385244	2385115	2385188	+	807425	807431	807391	807394	12	23.3231	5.25e-13	3UTR	sRNA	AGGTTTGCCATAGTCGAAGTGACGCGCCGGATGAGGGCATAAACGCCTCATCCGGCCTGGCGCAACGTTTGCCAGCGTAAGTCTGGTAAACGCAATGCCATCAGGCGGGGTTGTTTTATAGCAACCCCTC	GTTTTCGACATGGTTGGCCACCTTTACGGTGGCCTTTTTTA
glpT(SL1344_2252)	ArcZ(ncRNA0002)	-	2387596	2387689	2387571	2387575	+	3511913	3511919	3511860	3511862	89	40.2042	1.03e-62	CDS	sRNA	GAGGCTACAATATGTTGAGTATTTTTAAACCAGCGCCGCATAAAGCGCGCTTGCCAGCGGCGGAGATTGATCCGACCTATCGCCGATTACGCTGGCAGATTTTCCTGGGGATATTCTTT	ATTTCCCTGGTGTTGGCGCAGTATTCGCGCACCCCGGTCAAACCGGGGTCATTTTTTTTC
glpT(SL1344_2252)	SdsR(ncRNA0070)	-	2387558	2387591	2387536	2387539	-	1925620	1925647	1925690	1925695	11	58.7808	2.57e-16	CDS	sRNA	ATTTTCCTGGGGATATTCTTTGGCTATGCCGCGTATTATCTGGTGCGCAAGAACTT	CAACTTTTAGCGCACGGCTCTCTCCCAAGAGCCATTTCCCTGGACCGAATACAGGAATCGTATTCGGTCTCTTTTT
glpT(SL1344_2252)	STnc870(ncRNA0205)	-	2387519	2387606	2387482	2387567	+	4292569	4292600	4292532	4292543	24	132.226	6.07e-42	CDS	sRNA	CGATTACGCTGGCAGATTTTCCTGGGGATATTCTTTGGCTATGCCGCGTATTATCTGGTGCGCAAGAACTTTGCCCTCGCGATGCCCTACCTGGTAGAACAGGGTTTTTCACGCGGCGATCTGGG	ACAACCCTGTTTTCCTTGCCATAGACACCATCCCTGTCTTCCCCCACATGATGTGGGGGTTTTTTTTAT
gltA(SL1344_0712)	GcvB(ncRNA0014)	-	796921	796972	796892	796898	+	3156946	3156985	3156921	3156927	22	37.0927	1.19e-25	5UTR	sRNA	TGTTAATAAGTTATGCAACAGTACAATGATATTGACCCATTCTTTCAGGACAGTTATTAGTGATAGACAGGTTACATTACT	TACATTTACCCTGTCTGTCCATAGTGATTAATGTAGCACCGCCATATTGCGGTGCTTTTTTTTGT
gltA(SL1344_0712)	STnc870(ncRNA0205)	-	796921	796953	796896	796896	+	4292597	4292600	4292556	4292561	14	289.365	1.52e-29	5UTR	sRNA	AGTACAATGATATTGACCCATTCTTTCAGGACAGTTATTAGTGATAGACAGGTTACAT	ACACCATCCCTGTCTTCCCCCACATGATGTGGGGGTTTTTTTTAT
gltB(SL1344_3302)	FnrS(ncRNA0013)	+	3515734	3515747	3515781	3515788	-	1706782	1706785	--	--	14	12.1268	6.89e-11	5UTR	sRNA	AAGCTTTCTGGATGAGCCGTCTGCTCATCATATTTATGCAGTAATTGAGATTCCC	CTTAGATTAGTCGGCTTTTTTTTG
glyQ(SL1344_3621)	ArcZ(ncRNA0002)	-	3864034	3864112	3863994	3864049	+	3511915	3511917	3511859	3511865	20	62.1076	5.42e-28	CDS	sRNA	CCTTCCTTTAAATCCACACGTATCCAGCACGAAATAATATGCAAAAGTTTGATACCAGGACCTTCCAGGGCTTGATCCTGACCTTACAGGATTACTGGGCTCGCCAGGGCTGCACCATT	GATTTCCCTGGTGTTGGCGCAGTATTCGCGCACCCCGGTCAAACCGGGGTCATTTTTTT
gpB(SL1344_2645)	ArcZ(ncRNA0002)	+	2825696	2825721	2825747	2825750	+	3511914	3511917	3511858	3511860	19	75.2782	5.02e-28	CDS	sRNA	ATGATGCATTGCCCGTTATGCCAAAATGCCGCGCATGCTCGCACCAGTCGATATC	CGATTTCCCTGGTGTTGGCGCAGTATTCGCGCACCCCGGTCAAACCGGGGTCATTTTTTT
gpB(SL1344_2645).AS	ArcZ(ncRNA0002)	-	2825869	2825891	2825845	2825851	+	3511913	3511918	3511860	3511861	42	357.516	5.53e-81	Antisense	sRNA	GGTTTCTGACAGGGTGGGGGGGCGCTGGATCAACAGCCCCCGGTTTT	ATTTCCCTGGTGTTGGCGCAGTATTCGCGCACCCCGGTCAAACCGGGGTCATTTTTTTT
gpB(SL1344_2645).AS	STnc870(ncRNA0205)	-	2825890	2825898	2825845	2825849	+	4292591	4292600	4292550	4292561	12	335.024	3.22e-26	Antisense	sRNA	TGTTGCTGGTTTCTGACAGGGTGGGGGGGCGCTGGATCAACAGCCCCCGGTTTT	CCATAGACACCATCCCTGTCTTCCCCCACATGATGTGGGGGTTTTTTTTAT
gpmA(SL1344_0749)	CyaR(ncRNA0009)	-	836321	836406	836282	836359	+	2228930	2228932	2228863	2228870	11	92.8377	1.12e-17	CDS	sRNA	AATTATTATCATTACATATGATTTATAGGAGTGAGAGTATGGCTGTAACTAAGCTGGTTCTGGTACGTCACGGTGAAAGTCAATGGAACAAAGAGAACCGTTTCACCGGCTGGTATGATGTTGAC	ATAAATGCTAGCTGTACCAGGAACCACCTCCTTGGCCTGCGTAATCTCCCTTACGCAGGCTTATTTTTTG
greA(SL1344_3271)	ArcZ(ncRNA0002)	-	3489914	3489951	3489861	3489862	+	3511913	3511919	3511859	3511862	42	4.58544	3.11e-15	5UTR	sRNA	CTGACCTGGGACTGCGCGCCCGGGTTGGTGTTTTTTTGCTTCTGACCCTGGTATGGCATATGCCGGGGCTGGCTTAGCAGCCGGGGTAGAG	GATTTCCCTGGTGTTGGCGCAGTATTCGCGCACCCCGGTCAAACCGGGGTCATTTTTTTTC
grxA(SL1344_0848)	ArcZ(ncRNA0002)	-	944581	944606	944561	944564	+	3511913	3511919	3511860	3511864	50	133.63	2.37e-81	CDS	sRNA	AGGAGAGATATGTTTACTGTTATTTTTGGCCGTCCAGGGTGCCCTT	ATTTCCCTGGTGTTGGCGCAGTATTCGCGCACCCCGGTCAAACCGGGGTCATTTTTTTTC
grxA(SL1344_0848)	ChiX(ncRNA0003)	-	944618	944633	944528	944597	+	555566	555573	555496	555531	12	27.3031	2.52e-13	CDS	sRNA	CCTGTTCGCCGTCTGGCTTTATGTTCGAGGAGAGATATGTTTACTGTTATTTTTGGCCGTCCAGGGTGCCCTTATTGCGTGCGTGCAAAAGAGTTGGCGGAAAAAC	CGAAGCGAAAGCGTCGGGATAATAATAACGATGAAATTCCTCTTTGACGGGCCAATAGCGATATTGGCCATTTTTTTA
grxA(SL1344_0848)	STnc440(ncRNA0162)	-	944618	944633	944583	944599	+	4580542	4580566	--	--	21	1407.88	7.56e-57	5UTR	sRNA	CCTGTTCGCCGTCTGGCTTTATGTTCGAGGAGAGATATGTTTACTGTTATT	GTCCTCCTCATATTTGCGGCAGCGTAGTCTGCCGCTTTTTTTTAT
gshA(SL1344_2803)	STnc870(ncRNA0205)	-	2991217	2991306	2991195	2991196	+	4292570	4292599	4292538	4292543	20	612.286	2.76e-47	5UTR	sRNA	CACTATTATTAAGCTGGATGCCGGTCATCGGTGATTTGTTGTGCCTGTTAGCGGGATGGATGCGCATCCCGTGGGGGCGGACGATCTTTTTTTTGTGTCTTGGTAAGGCGCT	CTGTTTTCCTTGCCATAGACACCATCCCTGTCTTCCCCCACATGATGTGGGGGTTTTTTTTA
guaA(SL1344_2471)	ArcZ(ncRNA0002)	-	2621554	2621577	2621522	2621530	+	3511916	3511917	--	--	10	31.9143	3.76e-12	CDS	sRNA	GCTTCTACGGTGTACAGTTCCACCCGGAAGTGACTCACACCCGCCAGGGTATGCGC	GTCAAACCGGGGTCATTTTTTT
hemK(SL1344_1703)	ArcZ(ncRNA0002)	-	1830234	1830250	1830211	1830211	+	3511916	3511919	3511861	3511861	10	74.1236	2.32e-15	5UTR	sRNA	TGCTGATTGAGCCGATTGTTCAGGAACACCAGGCTGACCT	TTTCCCTGGTGTTGGCGCAGTATTCGCGCACCCCGGTCAAACCGGGGTCATTTTTTTTC
hemL(SL1344_0203)	ArcZ(ncRNA0002)	-	238509	238540	238487	--	+	3511913	3511917	3511860	3511863	27	109.897	2.64e-18	5UTR	sRNA	TGAATAACTTAGAATAGCGGGTATTCACTTTTTCTACGAACCAGGAATCTTTCC	ATTTCCCTGGTGTTGGCGCAGTATTCGCGCACCCCGGTCAAACCGGGGTCATTTTTTT
hexR(SL1344_1821)	ArcZ(ncRNA0002)	+	1938899	1938962	1938983	1938987	+	3511890	3511918	3511860	3511862	476	2379.44	0	5UTR	sRNA	CTTAAAATCCGACGTCGGTCATGTAATGAAAAAAAACGACACCTTTTTTAGCCATTTTGCCCCCTTCGGCAGTCGCCAGGAGTAATATC	ATTTCCCTGGTGTTGGCGCAGTATTCGCGCACCCCGGTCAAACCGGGGTCATTTTTTTT
hflX(SL1344_4296)	STnc870(ncRNA0205)	+	4626602	4626616	4626651	4626652	+	4292597	4292600	4292542	4292542	12	8.91051	2.22e-08	CDS	sRNA	TTTGACGGAGCGTCTTTCCGGCGAGGTGGCGCAGCATACGCTGCGTTTGCC	TTTCCTTGCCATAGACACCATCCCTGTCTTCCCCCACATGATGTGGGGGTTTTTTTTAT
hfQ(SL1344_4295)	CyaR(ncRNA0009)	+	4625219	4625231	4625255	4625277	+	2228928	2228932	2228863	2228867	13	19.693	6.58e-13	CDS	sRNA	TTTCTATTTATTTGGTGAATGGTATTAAGCTGCAAGGTCAAATCGAGTCCTTTGATCAG	ATAAATGCTAGCTGTACCAGGAACCACCTCCTTGGCCTGCGTAATCTCCCTTACGCAGGCTTATTTTTTG
hfQ(SL1344_4295)	STnc870(ncRNA0205)	+	4625224	4625239	4625257	4625265	+	4292570	4292600	4292541	4292542	52	708.559	3.75e-123	CDS	sRNA	ATTTATTTGGTGAATGGTATTAAGCTGCAAGGTCAAATCGAG	TTTTCCTTGCCATAGACACCATCCCTGTCTTCCCCCACATGATGTGGGGGTTTTTTTTAT
hha(SL1344_0466)	ArcZ(ncRNA0002)	-	527908	528006	527862	--	+	3511879	3511920	3511859	3511868	1547	889.747	0	5UTR	sRNA	AATACCTGGACGACACCTTTATGTTGTTCAGCAGCTATGGTATTAATACGCAGGATTTGCAAAAATGGCGTAAATCGGGCAACCGCCTGTTCCGTTGTTTCGTCAACGCCACCAGGGCCAATCCTGTTAGTTTGTCTTGTTAAAA	GATTTCCCTGGTGTTGGCGCAGTATTCGCGCACCCCGGTCAAACCGGGGTCATTTTTTTTCC
hha(SL1344_0466).maa(SL1344_0465).IGR	ArcZ(ncRNA0002)	-	527521	527544	527494	527498	+	3511915	3511919	3511860	3511862	18	36.6045	1.08e-21	IGR	sRNA	TATTATAGAACAGTGATATAGATCACATAGCAATAGCAGGGAACGTTCCCT	ATTTCCCTGGTGTTGGCGCAGTATTCGCGCACCCCGGTCAAACCGGGGTCATTTTTTTTC
hilA(SL1344_2856)	ArcZ(ncRNA0002)	+	3042088	3042149	3042170	3042177	+	3511913	3511919	3511857	3511863	72	223.664	2.95e-128	5UTR	sRNA	TAATCTCTATTGCAATGAGGCCAAGTTAAATATGTAAATATTTAGATGCCCGGCGCTGACTCTCTCTGCACCAGGATATACGGCAGCGTC	ACGATTTCCCTGGTGTTGGCGCAGTATTCGCGCACCCCGGTCAAACCGGGGTCATTTTTTTTC
hilA(SL1344_2856)	ArcZ(ncRNA0002)	+	3043046	3043079	3043079	3043113	+	3511913	3511921	3511860	3511865	106	420.214	2.92e-206	CDS	sRNA	GTTAAAGGTTATCACCTGCTGCACCAGGAAAGCATTAAGTTGATAGAACACCAACCCGCTTCTCTCTT	ATTTCCCTGGTGTTGGCGCAGTATTCGCGCACCCCGGTCAAACCGGGGTCATTTTTTTTCCG
hilA(SL1344_2856)	InvR(ncRNA0023)	+	3042400	3042405	--	--	+	3067556	3067586	3067516	3067521	70	71.2946	3.61e-87	5UTR	sRNA	TTTTCACCCTGTAAGAGAATACACTA	CCATTTGTCTCTTACGTTGCATTTATCAATCTGCTTTTTGATACAGCAGCACCTCGCTGCTGCTTTTTTTA
hilC(SL1344_2847)	ArcZ(ncRNA0002)	-	3035592	3035602	3035572	3035572	+	3511913	3511919	3511860	3511866	166	515.989	0	5UTR	sRNA	ATTTTGAGTTCCTTATAGCACACAGGATAAA	ATTTCCCTGGTGTTGGCGCAGTATTCGCGCACCCCGGTCAAACCGGGGTCATTTTTTTTC
hilC(SL1344_2847)	ArcZ(ncRNA0002)	-	3035152	3035194	3035116	3035159	+	3511914	3511918	3511859	3511863	24	48.3797	5.23e-31	CDS	sRNA	TATTTTTTTCATGCGGACTTGTTGCCAGGGATGAGTGATACTTTTGACTCTATTTTGCATGGTGTGGCATGTCCACGGG	GATTTCCCTGGTGTTGGCGCAGTATTCGCGCACCCCGGTCAAACCGGGGTCATTTTTTTT
hilC(SL1344_2847)	InvR(ncRNA0023)	-	3035431	3035512	3035405	3035471	+	3067520	3067588	3067486	3067527	498	19.9411	0	CDS	sRNA	CAGCCGAACAAATTTCCATTAATAAATGGATTAGCTGACGTAAGAGACTATTATGTCGCAAACTGCTTATTGTTTAAACTTAATAAAGGCAGTTTGCGAATTGAAAAC	TATTATAGCTATGGTCACTTTTACGGTTGGCCATTTGTCTCTTACGTTGCATTTATCAATCTGCTTTTTGATACAGCAGCACCTCGCTGCTGCTTTTTTTATT
hilC(SL1344_2847)	MgrR(ncRNA0043)	-	3035148	3035168	3035022	3035134	+	1550836	1550844	1550790	1550796	14	55.7824	7.86e-20	CDS	sRNA	AGGGATGAGTGATACTTTTGACTCTATTTTGCATGGTGTGGCATGTCCACGGGTTTGTAGTAATGTGAGTATTGATGATCATGATTATTCATATTTCTCATTGATGTATCTTATATCGGCATTTGTACGTAAGCCCGGTGGGTTTGA	ACACAAATCTATCCATGCAAGCATTTACCGCTGGTGAACCGGCGGTTTTTTTTTG
hilC(SL1344_2847)	RprA(ncRNA0058)	-	3035591	3035602	3035570	3035570	-	1401682	1401686	1401730	1401738	19	384.248	2.85e-42	5UTR	sRNA	ATTTTGAGTTCCTTATAGCACACAGGATAAAAT	AACAACGAATTGCTGTGTGTAGTCTTTGCCCGTCTCCTACGATGGGCTTTTTTTTTA
hilC(SL1344_2847).sprB(SL1344_2846).IGR	ArcZ(ncRNA0002)	-	3034544	3034608	3034520	3034560	+	3511913	3511918	3511859	3511862	29	190.416	3.51e-51	IGR	sRNA	ATTTCAGTATCGCTACACCAGTGATATGTAGTTAATGAAAGGGAATCGAAAGCGTTCATTGTCAGACATACATGGCCACCAGGCGCCGG	GATTTCCCTGGTGTTGGCGCAGTATTCGCGCACCCCGGTCAAACCGGGGTCATTTTTTTT
hilC(SL1344_2847).sprB(SL1344_2846).IGR	FnrS(ncRNA0013)	-	3034325	3034335	3034294	3034298	-	1706783	1706786	1706858	1706860	13	5.8984	8.47e-07	IGR	sRNA	ACCGAAGCTGTGGTCAGTTTTCAAAAAAGGATAAATAAATGA	GTCTTACTTCCTTTTTTGAATTACTGCATAGCACAATTGATTCGTACGACGCCGACTTAGATTAGTCGGCTTTTTTTT
hilD(SL1344_2855)	InvR(ncRNA0023)	+	3040642	3040676	3040700	3040704	+	3067532	3067587	3067502	3067511	66	48.9747	2.56e-75	CDS	sRNA	GTGCTCAAAAAAGAGCAGGTAGTTAACGTGACGCTTGAAGAGGTCAATGGCCACATGGATTTC	ACTTTTACGGTTGGCCATTTGTCTCTTACGTTGCATTTATCAATCTGCTTTTTGATACAGCAGCACCTCGCTGCTGCTTTTTTTAT
himA(SL1344_1273)	Spf(ncRNA0075)	+	1376008	1376072	1376094	1376094	+	4230579	4230612	4230539	4230544	18	8.17243	7.33e-11	CDS	sRNA	TTTTTCGAAGAGATCCGTCGTGCTCTGGAAAACGGTGAGCAGGTGAAACTCTCTGGTTTTGGTAACTTCGATCTGCGTGATAAAAAT	CTTTTACTTCACGTAATCGGATTTGGCTGAATATTTTAGCCGCCCCAGTCAGTTTATGACTGGGGCGTTTTTTA
himA(SL1344_1273)	STnc870(ncRNA0205)	+	1375892	1375905	1375931	1375936	+	4292591	4292599	4292542	4292547	23	915.492	2.07e-57	5UTR	sRNA	ATTCCAGGCATCATTGAGGGATTGAACCTATGGCGCTTACAAAAG	TTTCCTTGCCATAGACACCATCCCTGTCTTCCCCCACATGATGTGGGGGTTTTTTTTA
hns(SL1344_1682)	DapZ(ncRNA0010)	+	1804107	1804129	1804154	1804154	+	74920	74923	74845	74851	11	183.763	1.12e-21	CDS	sRNA	ACCCCAATATAAGTTTGAGATTACTACAATGAGCGAAGCACTTAAAAT	TAAATACCTTCGTGATGTGGTTGTGGTAATCAAGATTAATTGATTACAAAGGGCAATATATTATTGCCCTTTTGTTTTT
hns(SL1344_1682)	DsrA(ncRNA0011)	+	1804098	1804133	1804149	1804231	-	2026214	2026249	2026275	2026301	77	274.845	1.79e-149	CDS	sRNA	CAACAAACCACCCCAATATAAGTTTGAGATTACTACAATGAGCGAAGCACTTAAAATTCTGAACAACATCCGTACTCTTCGTGCGCAGGCAAGAGAATGTACTCTGGAAACGCTTGAAGAAATGCTGGAAAAAT	CACATCAGATTTCCTGGTGTAACGAATTTTCAAGTGCTTCTTGCATAAGCAAGTTTGATCCCGACCCGTAGGGCCGGGATTTTTTTCG
hrpA(SL1344_1571)	ArcZ(ncRNA0002)	-	1689541	1689541	--	--	+	3511916	3511918	3511861	3511862	12	250.676	5.67e-23	CDS	sRNA	AACTTCTGGCACCAGGGCAAT	TTTCCCTGGTGTTGGCGCAGTATTCGCGCACCCCGGTCAAACCGGGGTCATTTTTTTT
hsdS(SL1344_4455)	STnc870(ncRNA0205)	-	4798520	4798543	4798483	4798496	+	4292574	4292599	4292541	4292542	12	9548.2	3.43e-37	CDS	sRNA	TTATCAATTCAGAAATAAAATCAGGAGCTCAAGGGAAGTTGGCTTTGGCAAGGATAAAATC	TTTTCCTTGCCATAGACACCATCCCTGTCTTCCCCCACATGATGTGGGGGTTTTTTTTA
hslU(SL1344_4040)	STnc2000(ncRNA0278)	-	4320554	4320580	4320532	4320533	-	1204288	1204293	1204329	1204336	10	881.827	1.33e-26	3UTR	sRNA	CCAATGCATTTTCATCACTGTTGATGGGGCTGAAAAGCCCCATTTTTAT	AAAAATGATATGCAGTGATGTATGTTTGCCGGGTCGCCCCGGCTTTTTT
htrA(SL1344_0210)	RprA(ncRNA0058)	+	244392	244423	244450	244460	-	1401681	1401687	1401728	1401731	10	4058.47	1.12e-31	5UTR	sRNA	CTTTTTCCAGAAACTTTATTCCGGAACTTCGCGTTATAAAATGAATCTGACGTACACAGCAATTTTGCG	AATTGCTGTGTGTAGTCTTTGCCCGTCTCCTACGATGGGCTTTTTTTTTAA
hyb0(SL1344_3124)	ArcZ(ncRNA0002)	-	3334187	3334511	3334164	3334398	+	3511893	3511919	3511859	3511864	418	847.848	0	CDS	sRNA	AACAGTGCAAAATAAAAGCCAGGTCTTCGTAACGGAATAACTATAAAATGACTGGAGATAATACTCTCATCACTTCTCACGGCATTAACCGTCGTGATTTCATGAAGCTTTGTGCAGCACTGGCCGCTACTATGGGGCTCAGTAGCAAAGCCGCCGCAGAAATGGCAGAATCGGTATCCAATCCACAGCGTCCGCCCGTTATCTGGATTGGCGCTCAGGAGTGTACCGGTTGTACCGAATCACTGCTTCGTGCTACACACCCAACCGTTGAAAACCTCGTTCTGGAGACCATCTCTCTGGAATACCACGAGGTGCTTTCCGCCGCATTCGGTCACCAGGTCGAAGAAA	GATTTCCCTGGTGTTGGCGCAGTATTCGCGCACCCCGGTCAAACCGGGGTCATTTTTTTTC
hyb0(SL1344_3124)	RprA(ncRNA0058)	-	3334266	3334476	3334240	3334252	-	1401682	1401709	1401727	1401734	197	1383.75	4.78e-231	CDS	sRNA	AATAACTATAAAATGACTGGAGATAATACTCTCATCACTTCTCACGGCATTAACCGTCGTGATTTCATGAAGCTTTGTGCAGCACTGGCCGCTACTATGGGGCTCAGTAGCAAAGCCGCCGCAGAAATGGCAGAATCGGTATCCAATCCACAGCGTCCGCCCGTTATCTGGATTGGCGCTCAGGAGTGTACCGGTTGTACCGAATCACTGCTTCGTGCTACACACCCAACCGTTGAA	ACGAATTGCTGTGTGTAGTCTTTGCCCGTCTCCTACGATGGGCTTTTTTTTTA
hyb0(SL1344_3124)	RybD(ncRNA0062)	-	3334187	3334294	3334163	3334164	+	807425	807434	807392	807394	53	75.2566	2.25e-43	CDS	sRNA	GGAGTGTACCGGTTGTACCGAATCACTGCTTCGTGCTACACACCCAACCGTTGAAAACCTCGTTCTGGAGACCATCTCTCTGGAATACCACGAGGTGCTTTCCGCCGCATTCGGTCACCAGGTCGAAGAAAA	TTTTCGACATGGTTGGCCACCTTTACGGTGGCCTTTTTTATGG
hybG(SL1344_3117)	MgrR(ncRNA0043)	-	3327957	3327985	3327916	3327928	+	1550836	1550844	1550794	1550796	15	46.6112	4.7e-20	CDS	sRNA	CATGAGCATCATTGACGAAGACGAAGCGAAAGCCACGTTAGATGCGCTGCGCCGCATGGAGTACGACATC	AAATCTATCCATGCAAGCATTTACCGCTGGTGAACCGGCGGTTTTTTTTTG
iap(SL1344_2915)	ArcZ(ncRNA0002)	+	3098135	3098178	3098197	3098200	+	3511916	3511918	3511860	3511862	15	132.572	2.03e-25	CDS	sRNA	CCGTCATTCTGGCGCTCGGCGTAGGCTTTATCCTTCCTGCACAAGCAGCATCACCAGGGCCTGGTG	ATTTCCCTGGTGTTGGCGCAGTATTCGCGCACCCCGGTCAAACCGGGGTCATTTTTTTT
icc(SL1344_3157)	ArcZ(ncRNA0002)	-	3367419	3367453	3367367	3367375	+	3511913	3511918	3511859	3511861	37	111.888	2.27e-58	CDS	sRNA	CGTAATGCCGGTGAGCTGGATAGCGTGCTGGCGAATTTCCCGCGTGTAAAATATCTGTTATGCGGACATATTCACCAGGAGCTGGAT	GATTTCCCTGGTGTTGGCGCAGTATTCGCGCACCCCGGTCAAACCGGGGTCATTTTTTTT
icc(SL1344_3157)	InvR(ncRNA0023)	-	3368035	3368106	3367979	3368026	+	3067531	3067587	3067502	3067517	26	26.4791	1.38e-25	5UTR	sRNA	GCGACGAAAAGCATCAAATTAATCAGTTTCTGGCCGACTGGCTACGATTCTGTTTAGCACATGGAGCGATGGCGATTCCGGTTTATTAGCGTCGTGAAACCTAAGGACACCATTTGGAAAGCCTGTTA	ACTTTTACGGTTGGCCATTTGTCTCTTACGTTGCATTTATCAATCTGCTTTTTGATACAGCAGCACCTCGCTGCTGCTTTTTTTAT
idnK(SL1344_4415)	ArcZ(ncRNA0002)	+	4749785	4749787	--	--	+	3511915	3511917	3511860	3511861	19	2183.07	2.62e-43	CDS	sRNA	GTATTTAAATGGCCGGGGAAAGC	ATTTCCCTGGTGTTGGCGCAGTATTCGCGCACCCCGGTCAAACCGGGGTCATTTTTTT
idnO(SL1344_4413)	ArcZ(ncRNA0002)	-	4747767	4747799	4747741	4747749	+	3511915	3511917	3511860	3511861	12	2.75744e+06	4.38e-29	CDS	sRNA	GACATCTGCTGTTTGTCGATGGCGGTATGCTGGTTGCCGTCTGACCAGGGAAATACGAC	ATTTCCCTGGTGTTGGCGCAGTATTCGCGCACCCCGGTCAAACCGGGGTCATTTTTTT
ilvB(SL1344_3762)	ArcZ(ncRNA0002)	-	4018851	4018895	4018830	4018830	+	3511913	3511919	3511858	3511866	150	249.994	3.12e-270	CDS	sRNA	TCTACACCTCAGCGCTTTACGGGCGCGGAATTTATTGTTCATTTTCTGGAGCGCCAGGGGATTCGT	CGATTTCCCTGGTGTTGGCGCAGTATTCGCGCACCCCGGTCAAACCGGGGTCATTTTTTTTC
ilvC(SL1344_3869)	GcvB(ncRNA0014)	+	4138852	4138885	4138906	4138919	+	3156932	3156986	3156835	3156839	29	53.5529	4.09e-37	5UTR	sRNA	CATTCGCACAGATAGCAATCTGTAAACCGAACAATAAGCGCGACACACAACATCACGGAGTACACCAT	CTTACGGTTGTGATGTTGTGTTGTTGTGTTTGCAATTGGTCTGCGATTCAGACCACGGTAGCGAGACTACCCTTTTTCACTTCCTGTACATTTACCCTGTCTGTCCATAGTGATTAATGTAGCACCGCCATATTGCGGTGCTTTTTTTTGTA
ilvD(SL1344_3864)	STnc440(ncRNA0162)	+	4133505	4133536	4133563	4133566	+	4580528	4580564	4580492	4580496	10	213.76	1.94e-20	CDS	sRNA	GGGAAAAGATGGGGAGTAAATAAAGCATGCCTAAGTACCGTTCCGCCACCACCACTCATGGT	ATTACTTTGTGGTGTAGCGTAACGGTAATTGTCCTCCTCATATTTGCGGCAGCGTAGTCTGCCGCTTTTTTTT
ilvE(SL1344_3863)	DapZ(ncRNA0010)	+	4132347	4132386	4132402	4132418	+	74919	74925	74846	74854	78	1077.76	3.72e-200	5UTR	sRNA	AGTTAAGTAAACTGGTAGATGTTGCGCATGTCGCGATCTGCCAGAGCGCTGCCACATCACAACAAATCCGCG	AAATACCTTCGTGATGTGGTTGTGGTAATCAAGATTAATTGATTACAAAGGGCAATATATTATTGCCCTTTTGTTTTTGC
ilvE(SL1344_3863)	InvR(ncRNA0023)	+	4132647	4132683	4132699	4132710	+	3067546	3067586	3067517	3067529	30	10.5284	1.16e-19	CDS	sRNA	TTTTCCGGTTTCCCAGAGCATTGATGAGCTGATGGAAGCCTGCCGCGACGTAATTCGTAAAAAT	CATTTGTCTCTTACGTTGCATTTATCAATCTGCTTTTTGATACAGCAGCACCTCGCTGCTGCTTTTTTTA
ilvG(SL1344_3861)	STnc870(ncRNA0205)	+	4130438	4130571	4130515	4130536	+	4292575	4292600	4292539	4292561	73	487.2	1.39e-122	5UTR	sRNA	TGAAAAACTTAAGCGAGGAGCAGAGCGTGAATAACAGCATAAAATTCTGTTTCTCAAGATTTACGACGGGGATGTAACTATGAACGGGGCACAGTGGGT	TGTTTTCCTTGCCATAGACACCATCCCTGTCTTCCCCCACATGATGTGGGGGTTTTTTTTAT
ilvM(SL1344_3862)	ArcZ(ncRNA0002)	+	4132153	4132160	--	--	+	3511917	3511918	3511859	3511864	11	14.1208	1.08e-09	CDS	sRNA	AATTATCATGATGCAACATCAGGTCAAT	GATTTCCCTGGTGTTGGCGCAGTATTCGCGCACCCCGGTCAAACCGGGGTCATTTTTTTT
imp(SL1344_0094)	ArcZ(ncRNA0002)	-	107032	107046	107008	107012	+	3511913	3511918	3511860	3511861	39	133.78	7.92e-64	CDS	sRNA	AATTCCAGGTCTTTAACGATCAAAACACCAGCAGCTATT	ATTTCCCTGGTGTTGGCGCAGTATTCGCGCACCCCGGTCAAACCGGGGTCATTTTTTTT
imp(SL1344_0094)	FnrS(ncRNA0013)	-	106017	106051	105980	105992	-	1706782	1706787	1706841	1706848	20	11.7473	1.08e-14	CDS	sRNA	GATACCAATTCGAGCAAACCTGCAGACCAGATGCTCGGCTTGCAGTACAACTCTTGCTGCTATGCGATCCGC	TTTTTGAATTACTGCATAGCACAATTGATTCGTACGACGCCGACTTAGATTAGTCGGCTTTTTTTTG
imp(SL1344_0094)	InvR(ncRNA0023)	-	108117	108199	108096	108138	+	3067582	3067587	3067502	3067523	21	5.48102	1.95e-09	CDS	sRNA	CCGATGATGGAACAATAAATACAACGTATGAAAAAACGTATTCCCACTCTTCTGGCCACCATGATCGCCAGCGCCCTTTATAGTCATCAGGGGCTGGCAGCCGA	ACTTTTACGGTTGGCCATTTGTCTCTTACGTTGCATTTATCAATCTGCTTTTTGATACAGCAGCACCTCGCTGCTGCTTTTTTTAT
infA(SL1344_0891)	InvR(ncRNA0023)	-	987117	987151	987089	987091	+	3067580	3067586	3067513	3067513	12	17.3129	7.64e-11	5UTR	sRNA	GGCATTATCTTGCCGGTTCAAATTATGGTAGTGATACCCCAGAGGATTAGATGGCCAAAGAAG	TGGCCATTTGTCTCTTACGTTGCATTTATCAATCTGCTTTTTGATACAGCAGCACCTCGCTGCTGCTTTTTTTA
infB(SL1344_3259)	CyaR(ncRNA0009)	-	3476947	3476951	3476918	3476920	+	2228923	2228932	2228862	2228872	38	36.961	3.14e-44	CDS	sRNA	GGTTTCCGTGGATCGCCTGGTACAGCAGTTTGCT	CATAAATGCTAGCTGTACCAGGAACCACCTCCTTGGCCTGCGTAATCTCCCTTACGCAGGCTTATTTTTTG
infB(SL1344_3259)	Spf(ncRNA0075)	-	3476421	3476436	3476376	3476382	+	4230571	4230612	--	--	18	6.54749	1.89e-09	CDS	sRNA	AGCGTAAAGCGGAAGAAGAAGCACGTCGCAAACTCGAAGAAGAAGCGCGTCGTGTAGCAGA	GTAATCGGATTTGGCTGAATATTTTAGCCGCCCCAGTCAGTTTATGACTGGGGCGTTTTTTA
infC(SL1344_1268)	STnc440(ncRNA0162)	+	1370906	1370962	1370986	1370989	+	4580557	4580566	4580510	4580520	14	138.395	1.73e-25	5UTR	sRNA	GTCTGGACGTAAATGACGTGATTGAGAAGCTGCAACAAGAGATTCGCAGCCGCAGTCTTCAACAACTGGAGGAATAAAGTATTA	GTAACGGTAATTGTCCTCCTCATATTTGCGGCAGCGTAGTCTGCCGCTTTTTTTTAT
invA(SL1344_2875)	InvR(ncRNA0023)	-	3061325	3061332	--	--	+	3067557	3067586	3067504	3067512	17	11.037	4.46e-12	CDS	sRNA	GGAGCATATTCGTGGAGCAATGGCGCGT	TTTTACGGTTGGCCATTTGTCTCTTACGTTGCATTTATCAATCTGCTTTTTGATACAGCAGCACCTCGCTGCTGCTTTTTTTA
invB(SL1344_2874)	InvR(ncRNA0023)	-	3060968	3060983	3060932	3060939	+	3067578	3067586	3067527	3067527	11	6.88342	1.78e-06	CDS	sRNA	ACAATATAAGGGCTTAATTAAGGAAAAGATCTATGCAACATTTGGATATCGC	TTACGTTGCATTTATCAATCTGCTTTTTGATACAGCAGCACCTCGCTGCTGCTTTTTTTA
invC(SL1344_2873)	ArcZ(ncRNA0002)	-	3059840	3059855	3059782	3059817	+	3511915	3511920	3511859	3511862	25	24.3437	1.59e-25	CDS	sRNA	AACCGTAGCGGAATATTTTCGCGACCAGGGAAAACGGGTCGTGCTTTTTATCGATTCCATGACCCGTTATGCGC	GATTTCCCTGGTGTTGGCGCAGTATTCGCGCACCCCGGTCAAACCGGGGTCATTTTTTTTCC
invE(SL1344_2876)	InvR(ncRNA0023)	-	3063729	3063730	--	--	+	3067540	3067586	3067500	3067521	13	14.0667	1.1e-10	CDS	sRNA	TACTTAAGCACGTTGAAGAGCA	TCACTTTTACGGTTGGCCATTTGTCTCTTACGTTGCATTTATCAATCTGCTTTTTGATACAGCAGCACCTCGCTGCTGCTTTTTTTA
invF(SL1344_2878)	InvR(ncRNA0023)	-	3066413	3066501	3066384	3066397	+	3067525	3067587	3067498	3067506	62	5.66971	1.65e-25	CDS	sRNA	TTTTCTGAAAGCCGACACAATGAAAATTGCCTGATTCAGGAAGGCGCGCTGCTTTTTTGCGAGCAGGCCGTTGTCGCACCAGTATCAGGAGACCTGGTTTTTCGACCGTTAAAAATTG	GGTCACTTTTACGGTTGGCCATTTGTCTCTTACGTTGCATTTATCAATCTGCTTTTTGATACAGCAGCACCTCGCTGCTGCTTTTTTTAT
invG(SL1344_2877)	InvR(ncRNA0023)	-	3065417	3065543	3065400	3065506	+	3067536	3067587	3067503	3067526	91	49.8375	2.91e-81	CDS	sRNA	AATGCGCAATGCCGTGGTTTCTTTACGCAACGTCTCACTCAATGAGTTCAACAATTTTCTAAAACGCTCAGGTTTATATAACAAAAATTACCCGCTACGTGGCGATAACCGTAAAGGAACATTCTATGTTTCAGGGCCACCCGT	CTTTTACGGTTGGCCATTTGTCTCTTACGTTGCATTTATCAATCTGCTTTTTGATACAGCAGCACCTCGCTGCTGCTTTTTTTAT
invH(SL1344_2879).AS	InvR(ncRNA0023)	-	3067125	3067142	3067102	3067104	+	3067578	3067587	3067513	3067520	47	18.9243	1.33e-39	Antisense	sRNA	TTCGCAAGGTCTGACGGCACATACGGAAGAGACTGACACTC	TGGCCATTTGTCTCTTACGTTGCATTTATCAATCTGCTTTTTGATACAGCAGCACCTCGCTGCTGCTTTTTTTAT
invH(SL1344_2879).invF(SL1344_2878).IGR	InvR(ncRNA0023)	-	3066717	3066795	3066651	3066718	+	3067584	3067588	3067504	3067512	16	14.5794	4.99e-13	IGR	sRNA	GCTGCAGAACAATAAGCCAGAATTTATACACTATGAGCTAATTTTCTATTTTAAATCAGCAAACACTATGCAAGTTGGCCAATTTAATTAGCGGGCGGCATCAGTTTCATAATGATTGCATCAGGATTTTGCCACCCGCTCCCGG	TTTTACGGTTGGCCATTTGTCTCTTACGTTGCATTTATCAATCTGCTTTTTGATACAGCAGCACCTCGCTGCTGCTTTTTTTATT
invJ(SL1344_2871)	ArcZ(ncRNA0002)	-	3058034	3058043	3058012	3058012	+	3511913	3511919	3511860	3511863	102	360.801	1.25e-194	CDS	sRNA	GACTTACCGTTTTCAGCGCTGGGGAAATGACT	ATTTCCCTGGTGTTGGCGCAGTATTCGCGCACCCCGGTCAAACCGGGGTCATTTTTTTTC
ivbL(SL1344_3763)	DapZ(ncRNA0010)	-	4019017	4019112	4018962	4018971	+	74916	74926	74846	74856	227	1056.19	0	CDS	sRNA	TCCATGCTGAACGCGACCCTACTAACAACTGCGCCATCTCGCGCAGTGGTCGTCGTGCGTGTGGTGGTGGTCGTCGGCAATGCGCCGTAGGGTCCGGAACACACACGATTCCAAAACCCCGCCGGCGCAAACCGGGCGGGGTTTTTTGTTT	AAATACCTTCGTGATGTGGTTGTGGTAATCAAGATTAATTGATTACAAAGGGCAATATATTATTGCCCTTTTGTTTTTGCC
ivbL(SL1344_3763)	RprA(ncRNA0058)	-	4019020	4019049	4018965	4018965	-	1401682	1401686	1401731	1401739	14	60.1255	1.42e-20	CDS	sRNA	GTGGTGGTCGTCGGCAATGCGCCGTAGGGTCCGGAACACACACGATTCCAAAACCCCGCCGGCGCAAACCGGGCGGGGTTTTTTG	AAACAACGAATTGCTGTGTGTAGTCTTTGCCCGTCTCCTACGATGGGCTTTTTTTTTA
ivbL(SL1344_3763).ilvB(SL1344_3762).IGR	DapZ(ncRNA0010)	-	4019022	4019036	4018964	4018967	+	74875	74912	74845	74853	24	4667.06	1.29e-78	IGR	sRNA	GCAATGCGCCGTAGGGTCCGGAACACACACGATTCCAAAACCCCGCCGGCGCAAACCGGGCGGGGTTTTTTGT	TAAATACCTTCGTGATGTGGTTGTGGTAATCAAGATTAATTGATTACAAAGGGCAATATATTATTGCC
katE(SL1344_1253)	SdsR(ncRNA0070)	-	1355610	1355615	--	--	-	1925620	1925624	1925685	1925695	31	9147.47	3.3e-52	CDS	sRNA	ATCTTTTTTATCCAGGATGCGCATAA	CAACTTTTAGCGCACGGCTCTCTCCCAAGAGCCATTTCCCTGGACCGAATACAGGAATCGTATTCGGTCTCTTTTT
kdgR(SL1344_1771)	InvR(ncRNA0023)	-	1896027	1896100	1895992	1896027	+	3067548	3067586	3067504	3067518	18	26.7116	3.22e-18	CDS	sRNA	GGGCGACCTGGCGTGAAATTATAATAAAAACTCGTTCTGAATTTTATAAAACGCTCGTAATGAGGTGATAAATGGCAAACGCAGATCTGGATAAGCAGCCTGATTCTGT	TTTTACGGTTGGCCATTTGTCTCTTACGTTGCATTTATCAATCTGCTTTTTGATACAGCAGCACCTCGCTGCTGCTTTTTTTA
ksgA(SL1344_0091)	ArcZ(ncRNA0002)	-	103625	103669	103601	103605	+	3511913	3511918	3511860	3511862	44	82.217	2.88e-64	5UTR	sRNA	GGGCCTGCCCGTGCTAAAATACCAGGGATTCGGTCGGGGAGTGAATATTACGCTCGGCCTACCTTTTAT	ATTTCCCTGGTGTTGGCGCAGTATTCGCGCACCCCGGTCAAACCGGGGTCATTTTTTTT
kup(SL1344_3847)	ArcZ(ncRNA0002)	+	4110693	4110724	4110747	4110747	+	3511915	3511920	3511861	3511862	32	294.165	2.13e-60	5UTR	sRNA	TTTTATGATTAATCGTGCATACTGTGCGCTTTTTTGTGGGCCAAGGGACTAAGCA	TTTCCCTGGTGTTGGCGCAGTATTCGCGCACCCCGGTCAAACCGGGGTCATTTTTTTTCC
lctR(SL1344_3658)	ArcZ(ncRNA0002)	+	3909611	3909627	3909650	3909650	+	3511913	3511918	3511860	3511863	56	2574.35	2.65e-126	CDS	sRNA	TGCCCGGCGACCATAATGAGATGACCAGGGAGAATAAATC	ATTTCCCTGGTGTTGGCGCAGTATTCGCGCACCCCGGTCAAACCGGGGTCATTTTTTTT
lepB(SL1344_2544).AS	ArcZ(ncRNA0002)	+	2723429	2723465	2723476	2723490	+	3511892	3511920	3511856	3511864	392	921.375	0	Antisense	sRNA	AATTTATCCAGGAAATAATTCACGCTGCCGCTAAAAAGACGGCAGCGTGAACGATCATTTCA	CACGATTTCCCTGGTGTTGGCGCAGTATTCGCGCACCCCGGTCAAACCGGGGTCATTTTTTTTCC
lexA(SL1344_4174)	ArcZ(ncRNA0002)	+	4480502	4480518	4480541	4480541	+	3511915	3511917	3511859	3511862	15	16.5714	1.21e-13	5UTR	sRNA	ACTCACAGCATGATTGTATATACACCCAGGGGGCGGAATG	GATTTCCCTGGTGTTGGCGCAGTATTCGCGCACCCCGGTCAAACCGGGGTCATTTTTTT
lppA(SL1344_1311)	DapZ(ncRNA0010)	-	1416489	1416506	1416462	1416469	+	74919	74926	74846	74846	71	34.9851	1.88e-81	5UTR	sRNA	ACGCTACATGGAGATTAACTCAATCTAGAGGGTATTAATAATGAA	AAATACCTTCGTGATGTGGTTGTGGTAATCAAGATTAATTGATTACAAAGGGCAATATATTATTGCCCTTTTGTTTTTGCC
lppA(SL1344_1311)	MgrR(ncRNA0043)	-	1416456	1416507	1416353	1416473	+	1550787	1550844	1550760	1550800	99	5.15901	7.53e-31	CDS	sRNA	AACGCTACATGGAGATTAACTCAATCTAGAGGGTATTAATAATGAATCGTACTAAACTGGTACTGGGCGCGGTAATCCTGGGTTCTACTCTGCTGGCTGGTTGCTCCAGCAACGCTAAAATCGATCAGCTGTCTTCTGACGTTCAGACTCTGAAC	CAAGAATTTGCCCGGTAGCGTATAAGCAAAACACAAATCTATCCATGCAAGCATTTACCGCTGGTGAACCGGCGGTTTTTTTTTG
lppA(SL1344_1311)	RyeF(ncRNA0065)	-	1416458	1416476	1416427	1416432	-	1958511	1958559	1958591	1958592	26	90.9851	1.84e-41	CDS	sRNA	GGTATTAATAATGAATCGTACTAAACTGGTACTGGGCGCGGTAATCCTGG	GATTTTTACCGTTGCATCATGTCGCCCAATATGATGCTTGCTCGTACCAGGCCCCTGCCAATTCAACAGGGGCCTTTTTTTC
lppA(SL1344_1311)	RyfD(ncRNA0067)	-	1416448	1416505	1416426	1416474	-	2805088	2805169	2805120	2805220	35	18.3021	1.24e-31	CDS	sRNA	CGCTACATGGAGATTAACTCAATCTAGAGGGTATTAATAATGAATCGTACTAAACTGGTACTGGGCGCGGTAATCCTGGG	CAAGACGATCCGGTACGGGTAACTTTCTTTTCACATAATTCAGGTCATTCACCTTGAATAATTGAGGGATGACCTCATTTAATCTCCAGTAGCAATTTTGACCTGTTATGGGAGGAGTTATGCGTCTGGATCG
lpxC(SL1344_0134)	ArcZ(ncRNA0002)	+	156950	156978	--	--	+	3511915	3511918	3511861	3511864	22	5.08089	1.71e-09	CDS	sRNA	GGACACTTAAACGTATCGTTCAGGCGACTGGCGTCGGTTTACACACCGG	TTTCCCTGGTGTTGGCGCAGTATTCGCGCACCCCGGTCAAACCGGGGTCATTTTTTTT
lpxD(SL1344_0227).fabZ(SL1344_0228).IGR	GcvB(ncRNA0014)	+	266491	266512	266528	266539	+	3156940	3156985	3156907	3156927	75	14.2128	1.57e-56	IGR	sRNA	TTATTATTGCCTTTTTGTATATTTGGACAGGAAGAGTATTTTGACTACT	TTTTTCACTTCCTGTACATTTACCCTGTCTGTCCATAGTGATTAATGTAGCACCGCCATATTGCGGTGCTTTTTTTTGT
lrhA(SL1344_2299)	ArcZ(ncRNA0002)	-	2438803	2438912	2438779	2438808	+	3511898	3511919	3511859	3511869	289	205.598	0	5UTR	sRNA	AATTACATTCTAACATTTACCTGGGTAACCAGGCGGTACTGCGAAGGATGCACATTACAAATGGAATTGCTTGTTTCTGAATGCACAGCATTAACCAGGTCAGCCCGATATGACCCGCCAGTAAGTGAAAAATT	GATTTCCCTGGTGTTGGCGCAGTATTCGCGCACCCCGGTCAAACCGGGGTCATTTTTTTTC
lrhA(SL1344_2299)	RprA(ncRNA0058)	-	2438835	2438904	2438795	2438821	-	1401682	1401709	1401728	1401738	143	2156.02	1.99e-269	5UTR	sRNA	TCTAACATTTACCTGGGTAACCAGGCGGTACTGCGAAGGATGCACATTACAAATGGAATTGCTTGTTTCTGAATGCACAGCATTAACCAGGTCAGCCCGATATGACCCGC	AACAACGAATTGCTGTGTGTAGTCTTTGCCCGTCTCCTACGATGGGCTTTTTTTTTA
lrhA(SL1344_2299)	STnc1920(ncRNA0276)	-	2438846	2438911	2438820	2438835	+	2756613	2756648	2756586	2756587	39	1780.41	7.29e-111	5UTR	sRNA	ATTACATTCTAACATTTACCTGGGTAACCAGGCGGTACTGCGAAGGATGCACATTACAAATGGAATTGCTTGTTTCTGAATGCACAGCATTA	TTTATGCATTTCTGAAACTCCCCCGCAGGTAAGCTCCTTTTCCCTCCTGCGGGAATTTTTTAT
lrhA(SL1344_2299)	uhpT(SL1344_3753)	-	2438845	2438869	2438815	2438824	-	4007442	4007461	4007495	4007501	25	12165.8	6.61e-92	5UTR	3UTR	AAGGATGCACATTACAAATGGAATTGCTTGTTTCTGAATGCACAGCATTAACCAG	ATATCGCTTAAATGTGTGCATTTGGTAACGTTTTGCCCGGCTTAACGCCGGGCTTTTTAT
lysP(SL1344_2177)	ArcZ(ncRNA0002)	-	2297429	2297457	2297407	2297408	+	3511913	3511917	3511859	3511861	10	127.657	2.85e-17	CDS	sRNA	GCAATGATTGGCGTCGCGATGATCGTGGGCTTCTCTTTCCAGGGAACTGAG	GATTTCCCTGGTGTTGGCGCAGTATTCGCGCACCCCGGTCAAACCGGGGTCATTTTTTT
lysP(SL1344_2177)	MgrR(ncRNA0043)	-	2298095	2298101	--	--	+	1550820	1550843	1550784	1550796	11	104.511	1.28e-18	5UTR	sRNA	CTCATTTTTTGGATGGATAGCATTTTC	AGCAAAACACAAATCTATCCATGCAAGCATTTACCGCTGGTGAACCGGCGGTTTTTTTTT
lysS(SL1344_3016)	MgrR(ncRNA0043)	-	3219825	3219908	3219797	3219805	+	1550819	1550845	1550775	1550802	47	1106.3	4.01e-110	3UTR	sRNA	GCCATCCGGCATCTCTTCGTTCAGGCGTAGCGCCATCAGGCAATCTTTAACGCTGGCAGTAATTGAGCAGTCGTTCACGCGCTTGTTCGTCTGACGCTTGCATGACCATCCA	TAGCGTATAAGCAAAACACAAATCTATCCATGCAAGCATTTACCGCTGGTGAACCGGCGGTTTTTTTTTGC
maa(SL1344_0465)	ArcZ(ncRNA0002)	-	527140	527407	527115	527365	+	3511913	3511918	3511860	3511862	93	377.023	1.01e-157	CDS	sRNA	GGCACTGTATTGCCCGACCGATGAAACTTTATGCCAGGATCGACTGCGGGCGCGTCAACTCATCCATCAATACAATTATACTACGCCTGATGAAATAAATAAGCGTCAGGCGATTTTACGCGACCTGTTGGGTCGATGCGAAGACGCCTATATTGAACCTTCCTTCCGTTGCGACTACGGCTATAATATTTTTCTTGGTCACTCCTTTTACGCTAACTTCGACTGCGTCATGCTTGATGTTTGCCCAATTCATATTGGCGATAATTGTATGCTCGCGCCAGGGGTACATATCT	ATTTCCCTGGTGTTGGCGCAGTATTCGCGCACCCCGGTCAAACCGGGGTCATTTTTTTT
maeB(SL1344_2435)	Spf(ncRNA0075)	-	2579986	2580011	2579938	2579974	+	4230567	4230612	4230536	4230558	35	45.3566	1.38e-40	CDS	sRNA	GCGTCACTTTTTGAACGATACGTGAAAGGAACAACAAGATGGATGAGCAGTTAAAACAAAGCGCCCTTGATTTC	GACCTTTTACTTCACGTAATCGGATTTGGCTGAATATTTTAGCCGCCCCAGTCAGTTTATGACTGGGGCGTTTTTTA
maeB(SL1344_2435)	Spf(ncRNA0075)	-	2580001	2580111	2579974	2579989	+	4230570	4230614	4230521	4230544	48	52.2506	8.21e-30	5UTR	sRNA	TTATAAGTTGATAACAAACTCTTGCGCTGCGTCGTGATAGTTTGCAGACCTTCAAAGTTTGTGTTGCGCAGTACGGTGATAATGTGCGGCGCACCAGGCCGCGTCACTTTTTGAACGATACGTGAAAGGAACAACAAG	ATGTTCTATCTTTCAGACCTTTTACTTCACGTAATCGGATTTGGCTGAATATTTTAGCCGCCCCAGTCAGTTTATGACTGGGGCGTTTTTTATT
maeB(SL1344_2435)	STnc870(ncRNA0205)	-	2577633	2577681	2577613	2577613	+	4292570	4292599	4292542	4292542	14	543.442	6.33e-33	3UTR	sRNA	CTCTCTTCTGGCGCAGGTTCTCCTGCGCTTTTTTGTCTATGGAAAACCCCCAGCTAGGCTGGGGGTTCC	TTTCCTTGCCATAGACACCATCCCTGTCTTCCCCCACATGATGTGGGGGTTTTTTTTA
mdfA(SL1344_0842)	FnrS(ncRNA0013)	+	937731	937738	937766	937767	-	1706782	1706787	1706842	1706842	17	80.9908	4.17e-24	5UTR	sRNA	GGTTTTTATTGGCGAAGAGATGGTATGCAGAATCGTT	AATTACTGCATAGCACAATTGATTCGTACGACGCCGACTTAGATTAGTCGGCTTTTTTTTG
mdoG(SL1344_1087)	ArcZ(ncRNA0002)	+	1192788	1192801	1192820	1192824	+	3511913	3511918	3511860	3511861	32	612.844	4.78e-66	CDS	sRNA	TTTTAAGCTCGAATTTTACCATCAGGGGATGTACTTC	ATTTCCCTGGTGTTGGCGCAGTATTCGCGCACCCCGGTCAAACCGGGGTCATTTTTTTT
mglA(SL1344_2166)	ArcZ(ncRNA0002)	-	2283933	2284008	2283972	2283973	+	3511915	3511918	3511859	3511861	22	842.605	3.76e-47	CDS	sRNA	AAAAGATTCCGGCAGCATTGTATTTCAGGGAAAAGAA	GATTTCCCTGGTGTTGGCGCAGTATTCGCGCACCCCGGTCAAACCGGGGTCATTTTTTTT
mglA(SL1344_2166).mglC(SL1344_2165).IGR	ArcZ(ncRNA0002)	-	2282637	2282709	2282664	2282667	+	3511913	3511918	3511860	3511863	51	141.23	6.82e-84	IGR	sRNA	AATTTTGCGTCTTGCTTCTTTGCACCTTTAAGATCAGGGGCTCCTT	ATTTCCCTGGTGTTGGCGCAGTATTCGCGCACCCCGGTCAAACCGGGGTCATTTTTTTT
mglA(SL1344_2166).mglC(SL1344_2165).IGR	SdsR(ncRNA0070)	-	2282673	2282693	2282644	2282647	-	1925620	1925670	1925692	1925694	14	188.304	3.9e-27	IGR	sRNA	TCTTTGCACCTTTAAGATCAGGGGCTCCTTATGAGTGCGTTAAACAAGAA	AACTTTTAGCGCACGGCTCTCTCCCAAGAGCCATTTCCCTGGACCGAATACAGGAATCGTATTCGGTCTCTTTTT
mglB(SL1344_2167)	STnc440(ncRNA0162)	-	2285351	2285437	2285346	2285351	+	4580521	4580566	4580492	4580499	46	404.285	8.49e-75	5UTR	sRNA	TGGGATAGGCTCTAAATACGCTTCGGCGTTCAGTAACACGCGTTAACGTGCTGAACAGCCGGGCATTTTTTTACGCTATACCCTACATAATA	ATTACTTTGTGGTGTAGCGTAACGGTAATTGTCCTCCTCATATTTGCGGCAGCGTAGTCTGCCGCTTTTTTTTAT
MgrR(ncRNA0043)	fabA(SL1344_1007)	+	1550744	1550783	1550785	1550791	-	1114145	1114187	1114197	1114216	10	14.3411	4.33e-09	sRNA	3UTR	CGATCCGTTATCCTCGCAAGAATTTGCCCGGTAGCGTATAAGCAAAAC	TATTCCGCGCTATCGGTATCATGCTTGCAAAGCCCATAAAGGCGAAACCTCCGCACTGCGGAGGTTTCTTTT
MgrR(ncRNA0043)	STnc480(ncRNA0167)	+	1550745	1550778	1550843	1550844	-	587338	587361	587376	587392	13	6.96865	9.94e-08	sRNA	sRNA	GATCCGTTATCCTCGCAAGAATTTGCCCGGTAGCGTATAAGCAAAACACAAATCTATCCATGCAAGCATTTACCGCTGGTGAACCGGCGGTTTTTTTTTG	ATTTTTAATTTAGCTATGTTGGATTTTGCCACGGTGAGAACCGTGGCTTTTTTTA
mgtA(SL1344_4387)	MgrR(ncRNA0043)	+	4720093	4720114	4720087	4720136	+	1550836	1550844	1550798	1550798	10	10.3356	9.08e-08	5UTR	sRNA	CCCTCTCCCGCGATGGAGAATTTTCCTTTTCCGGTAAGCCTGCC	CTATCCATGCAAGCATTTACCGCTGGTGAACCGGCGGTTTTTTTTTG
mltA(SL1344_2968)	ArcZ(ncRNA0002)	-	3161324	3161365	3161289	3161324	+	3511913	3511918	3511859	3511862	24	91.9217	9.59e-37	CDS	sRNA	TCGGCGGAGCGATTAAAGGCCAGCACTTTGATATTTACCAGGGAATTGGCCCGGATGCCGGGCATCGTGCCGGATGG	GATTTCCCTGGTGTTGGCGCAGTATTCGCGCACCCCGGTCAAACCGGGGTCATTTTTTTT
mltD(SL1344_0255)	RprA(ncRNA0058)	-	301224	301308	301273	301276	-	1401683	1401686	1401726	1401732	12	359.633	6.46e-27	5UTR	sRNA	CGTCTTTTAAGCAACTATTGACACACACATGAAGGC	GAATTGCTGTGTGTAGTCTTTGCCCGTCTCCTACGATGGGCTTTTTTTTT
moaA(SL1344_0778)	ArcZ(ncRNA0002)	+	869793	869832	869855	869855	+	3511914	3511918	3511859	3511862	25	53.6928	3.13e-33	5UTR	sRNA	GTCATTTTTGATACGGTGCTTTGGCCGTGACAACGTTTAACGTTTGCCACCAGGGCGCAGGAA	GATTTCCCTGGTGTTGGCGCAGTATTCGCGCACCCCGGTCAAACCGGGGTCATTTTTTTT
mobB(SL1344_3941)	RprA(ncRNA0058)	-	4223020	4223049	4222944	4223016	-	1401682	1401692	1401728	1401753	38	2406.92	4.87e-76	3UTR	sRNA	TTTACAGTTACCGCACACGCAAAAAAGCCCGTCCGTCAGGATGGGCTTCTTCACTAAACTAATGCCTGGCAGTTTATGGCGGGCGTCCTGCCCGCCACCCTCCGGG	AAATCCCCTGAGTGAAACAACGAATTGCTGTGTGTAGTCTTTGCCCGTCTCCTACGATGGGCTTTTTTTTTA
mod(SL1344_0352)	ArcZ(ncRNA0002)	+	403513	403561	403578	403581	+	3511913	3511918	3511860	3511862	13	331.916	9.11e-26	CDS	sRNA	ATGTGATGTGGAAGCGCAAAAAAGAGATTTCTAACGACTCTGATAACGTTTCCATCCAGGGGGAATACA	ATTTCCCTGGTGTTGGCGCAGTATTCGCGCACCCCGGTCAAACCGGGGTCATTTTTTTT
motA(SL1344_1858)	CyaR(ncRNA0009)	-	1978551	1978582	1978506	1978537	+	2228926	2228932	2228863	2228873	48	53.5182	2.61e-62	5UTR	sRNA	ATGTCGTGCTTATCTTATTAGGTTACCTGGTGGTTATCGGTACAGTTTTCGGCGGTTATGTCATGACCGGCGGACAC	ATAAATGCTAGCTGTACCAGGAACCACCTCCTTGGCCTGCGTAATCTCCCTTACGCAGGCTTATTTTTTG
mppA(SL1344_1609)	ArcZ(ncRNA0002)	-	1729733	1729735	1729698	1729698	+	3511914	3511917	3511859	3511862	12	306.382	1.24e-23	CDS	sRNA	ATTTTTACCCATTAACCAGGAATCGGCTGCGACGAAAC	GATTTCCCTGGTGTTGGCGCAGTATTCGCGCACCCCGGTCAAACCGGGGTCATTTTTTT
msbB(SL1344_1823)	ArcZ(ncRNA0002)	-	1942375	1942481	1942347	1942349	+	3511913	3511917	3511859	3511861	28	108.85	5.27e-29	CDS	sRNA	CCTTTCGCTATCCACAGTATTGGGGCGCCTGGTTGGGCGCGGCGGCAATGGCGGGGATCGCATTAACACCGGCATCATTCCGCGACCCTTTGCTGGCGACGCTGGGGCGTTTTGCCGGACGGCTGGGGAAGAGTT	GATTTCCCTGGTGTTGGCGCAGTATTCGCGCACCCCGGTCAAACCGGGGTCATTTTTTT
msbB(SL1344_1823).SL1344_1824(SL1344_1824).IGR	ArcZ(ncRNA0002)	+	1942523	1942581	1942562	1942642	+	3511913	3511917	3511860	3511862	11	140.424	3.26e-19	IGR	sRNA	GTTTCCATGCTTTTCCAGGGTCTGCTGACGCGAAAAGGAATTGTGAATAGTGTAGCGACGTCTGCGTCTCACACAAAACAAAAAAGCCGGCACACATCGCGTACCGGCTCTGTCAGCGCA	ATTTCCCTGGTGTTGGCGCAGTATTCGCGCACCCCGGTCAAACCGGGGTCATTTTTTT
Msr(ncRNA0047)	SdsR(ncRNA0070)	+	4072502	4072525	4072543	4072553	-	1925618	1925649	1925686	1925703	89	120.621	1.55e-147	sRNA	sRNA	CAGACACTAACTTATTGAGTACTTTTAGGGTTGCGCTAGAAAGTTTTCTACC	ATTAATGCCAACTTTTAGCGCACGGCTCTCTCCCAAGAGCCATTTCCCTGGACCGAATACAGGAATCGTATTCGGTCTCTTTTTAT
mtlD(SL1344_3651)	ArcZ(ncRNA0002)	+	3899281	3899283	3899317	3899320	+	3511915	3511918	3511876	3511876	13	90.5224	1.69e-20	CDS	sRNA	GTTTAAAGGCGCGTTGCCAAACATTCCGGGGATGGAGTTA	CGCAGTATTCGCGCACCCCGGTCAAACCGGGGTCATTTTTTTT
mug(SL1344_3186).SL1344_3187(SL1344_3187).IGR	STnc870(ncRNA0205)	+	3399802	3399837	3399855	3399856	+	4292591	4292600	4292554	4292561	15	770.12	4.7e-37	IGR	sRNA	ATATAATTAAGCCACTCTAAAGAGTGGCCTTTTTGTTTCTGACAGGGCTCACCCC	AGACACCATCCCTGTCTTCCCCCACATGATGTGGGGGTTTTTTTTAT
murC(SL1344_0129)	ArcZ(ncRNA0002)	+	151929	151963	151979	151988	+	3511913	3511918	3511855	3511862	72	146.47	1.3e-118	CDS	sRNA	ATTATCAGCAGATAGGGCCGCAGGGGCACTTTACGCTGTTGCGCCAGGGAATGCCGGATC	CCACGATTTCCCTGGTGTTGGCGCAGTATTCGCGCACCCCGGTCAAACCGGGGTCATTTTTTTT
murD(SL1344_0126)	MgrR(ncRNA0043)	+	147406	147486	147468	147511	+	1550821	1550845	1550792	1550800	51	114.076	1.5e-82	CDS	sRNA	CTGATTACCAGGACAAAAACGTCGTCATTATTGGTCTGGGCTTAACCGGACTCTCTTGCGTGGACTTTTTTCTCGCCCGCGGCGTGACGCCGCGGGTGATGGATAC	ACAAATCTATCCATGCAAGCATTTACCGCTGGTGAACCGGCGGTTTTTTTTTGC
mutY(SL1344_3085).AS	MgrR(ncRNA0043)	-	3289402	3289495	3289377	3289381	+	1550819	1550845	1550788	1550800	145	1473.43	4.14322184119039e-312	Antisense	sRNA	CCGAGAGCCATACTTTGTAAGGCGTCTTGTTAATTTGCCAGGGCAGCGTTTTCCGCCCGTATTTGTCGTACCAGTCCAGAACCTGGGCTGAAAATTGAGACGCTTGCATGGAAACTCAT	AAACACAAATCTATCCATGCAAGCATTTACCGCTGGTGAACCGGCGGTTTTTTTTTGC
mviN(SL1344_1107)	ArcZ(ncRNA0002)	+	1211004	1211642	1211132	1211670	+	3511913	3511919	3511859	3511863	107	608.39	3.1e-92	CDS	sRNA	GGAGTCTGTAAGGCCTGATAAGACGTTTTAACGTCGCCGTCAGGCGCGGTGATACAGCCGGATACGGCAGAAGTTGCGTTATCCGGTCGATGGATCAGCCATGCAGGAGTTTTACGCCAGGGTCTGGAATACAAAAGAAATGAATTTATTGAAATCGCTGGCTGCCGTCAGCTCGATGACTATGTTTTCACGCGTGTTGGGCTTTGCCCGTGATGCGATTGTCGCCAGAATTTTTGGCGCAGGGATGGCGACCGACGCCTTTTTTGTGGCGTTTAAACTCCCTAATTTACTACGCCGGATCTTTGCCGAAGGCGCTTTTTCTCAGGCCTTTGTGCCTATCCTGGCGGAATATAAGAGCAAGCAGGGTGAAGAAGCGACGCGGATCTTTGTCGCTTACGT…	GATTTCCCTGGTGTTGGCGCAGTATTCGCGCACCCCGGTCAAACCGGGGTCATTTTTTTTC
nagA(SL1344_0665)	ArcZ(ncRNA0002)	-	743502	743507	--	--	+	3511914	3511918	3511859	3511862	28	128.694	6.7e-46	5UTR	sRNA	GTAAATTTTTGATATCGGGGGTCGGA	GATTTCCCTGGTGTTGGCGCAGTATTCGCGCACCCCGGTCAAACCGGGGTCATTTTTTTT
napA(SL1344_2229)	STnc870(ncRNA0205)	-	2356644	2356681	2356620	2356651	+	4292565	4292599	4292541	4292541	13	127.707	3.17e-23	CDS	sRNA	GAGGGCGTACTGGCGGTGTCGCTGGTTTATCACCAGCAGGATGAGCAAGGTGAGGAAACACC	TTTTCCTTGCCATAGACACCATCCCTGTCTTCCCCCACATGATGTGGGGGTTTTTTTTA
napF(SL1344_2231)	ArcZ(ncRNA0002)	-	2357014	2357412	2357007	2357339	+	3511883	3511919	3511859	3511877	1573	520.803	0	CDS	sRNA	TTTATTGGTATTCACTCCCTATGGAAGCGTGTCGTTATGGAAGGGCGATATCATGGTTGATTTATCCCGTCGAAGCATGTTGACCGGCAGTTGGCGCAACGCCAGCAATGGGATTCTTCCGCCGTGGGCCAGAGAAACGACCTATTTTCTCGCACATTGTCTGCGTTGCGACGCCTGCATCCAGGCGTGTGAGGCCGACATCCTGCAGCGAGGGGCGGGGGGATATCCGAGCGTAGATTTCAAACGGGGCGAGTGCAGCTTTTGTTATGCCTGTGCGCAGGCCTGTACCGAATCGCTTTTTCTTCCGCGCCACACCAGGGCCTGGGATCTGGTTTTTACGCTCACGGAAAACTGCCTCGCCAGGCAATCGGTTGAATGCCATCGTTGCCAGGACAGTTG…	GATTTCCCTGGTGTTGGCGCAGTATTCGCGCACCCCGGTCAAACCGGGGTCATTTTTTTTC
napF(SL1344_2231)	STnc870(ncRNA0205)	-	2357018	2357410	2356992	2357375	+	4292563	4292599	4292540	4292551	120	414.855	2.14e-217	CDS	sRNA	TATTGGTATTCACTCCCTATGGAAGCGTGTCGTTATGGAAGGGCGATATCATGGTTGATTTATCCCGTCGAAGCATGTTGACCGGCAGTTGGCGCAACGCCAGCAATGGGATTCTTCCGCCGTGGGCCAGAGAAACGACCTATTTTCTCGCACATTGTCTGCGTTGCGACGCCTGCATCCAGGCGTGTGAGGCCGACATCCTGCAGCGAGGGGCGGGGGGATATCCGAGCGTAGATTTCAAACGGGGCGAGTGCAGCTTTTGTTATGCCTGTGCGCAGGCCTGTACCGAATCGCTTTTTCTTCCGCGCCACACCAGGGCCTGGGATCTGGTTTTTACGCTCACGGAAAACTGCCTCGCCAGGCAATCGGTTGAATGCCATCGTTGCCAGGACAGTTGTG…	GTTTTCCTTGCCATAGACACCATCCCTGTCTTCCCCCACATGATGTGGGGGTTTTTTTTA
narL(SL1344_1695)	ArcZ(ncRNA0002)	+	1822896	1822901	--	--	+	3511914	3511918	3511810	3511862	24	1838.44	5.54e-54	5UTR	sRNA	ACTTCACAGAAACCCAGGGAGATACC	AAACAGGACTGCGCCTTTGACATCATCATAATAAGCACGGCGCAGCCACGATTTCCCTGGTGTTGGCGCAGTATTCGCGCACCCCGGTCAAACCGGGGTCATTTTTTTT
narP(SL1344_2222)	InvR(ncRNA0023)	+	2344405	2344455	2344485	2344493	+	3067580	3067586	3067526	3067556	36	14.9588	9.39e-28	CDS	sRNA	AGGAGATACAGCATGCCTGAAGTAACACCTTTTCAGGTGCTTATTGTGGACGACCATCCACTTATGCGGCGAGGTATTCGTCAATTACT	CTTACGTTGCATTTATCAATCTGCTTTTTGATACAGCAGCACCTCGCTGCTGCTTTTTTTA
narP(SL1344_2222)	SL1344_3664(SL1344_3664)	+	2344401	2344412	2344462	2344462	+	3915413	3915416	3915350	3915350	10	1010.98	3.58e-27	CDS	3UTR	ACTCAGGAGATACAGCATGCCTGAAGTAACACCTTTTCAGGTGCTTATTGTGGACGACCATC	TGTCCACATTGCGAATTCTTCGCTCCGCTGTTCCGGGATTGCACTCCATCGGAACAGCGTTTTTTAG
narP(SL1344_2222)	STnc870(ncRNA0205)	+	2344398	2344638	2344481	2344666	+	4292591	4292599	4292540	4292556	34	341.053	3.09e-37	CDS	sRNA	AAAACTCAGGAGATACAGCATGCCTGAAGTAACACCTTTTCAGGTGCTTATTGTGGACGACCATCCACTTATGCGGCGAGGTATTCGTCAATTACTGGAACTGGACCCGGCTTTTCATGTCGTTGCCGAAGCGGGTGACGGGGCGAGTGCGATCGATCTGGCGAATCGCATTGAGCCCGATCTGATCCTGCTGGATCTGAATATGAAAGGTCTGAGCGGGTTAGATACCCTGAACGCGCTACGCCGGGATGGTGTGACGGCGCAAATTA	GTTTTCCTTGCCATAGACACCATCCCTGTCTTCCCCCACATGATGTGGGGGTTTTTTTTA
ndk(SL1344_2488)	GcvB(ncRNA0014)	-	2658221	2658251	2658191	2658191	+	3156983	3156984	3156778	3156843	10	36.3537	2.32e-12	CDS	sRNA	CTGACATAACAACAGAACATATTTCAGAGGTAAACATGGCTATTGAACGGACTTTTTCCAT	ACTTCCTGAGCCGGAACGAAAAGTTTTATCGGAATGCGTGTTCTGATGGGCTTTTGGCTTACGGTTGTGATGTTGTGTTGTTGTGTTTGCAATTGGTCTGCGATTCAGACCACGGTAGCGAGACTACCCTTTTTCACTTCCTGTACATTTACCCTGTCTGTCCATAGTGATTAATGTAGCACCGCCATATTGCGGTGCTTTTTTTTG
nhaB(SL1344_1734)	STnc870(ncRNA0205)	+	1863631	1863658	1863676	1863680	+	4292564	4292600	4292541	4292542	63	7177.77	1.47e-187	5UTR	sRNA	GTTTAAACATAAAAACGCTATTTCATTTTTCTAGGTAAGGAAAAATTTCA	TTTTCCTTGCCATAGACACCATCCCTGTCTTCCCCCACATGATGTGGGGGTTTTTTTTAT
nikR(SL1344_3549)	InvR(ncRNA0023)	+	3772654	3772657	3772692	3772692	+	3067546	3067586	3067523	3067526	10	27.3361	8.34e-11	CDS	sRNA	TTTAAGTCAGATGCAACGTGTCACCATCACCCTCGATGA	TCTCTTACGTTGCATTTATCAATCTGCTTTTTGATACAGCAGCACCTCGCTGCTGCTTTTTTTA
nrfA(SL1344_4213)	STnc870(ncRNA0205)	+	4537299	4537387	4537399	4537413	+	4292563	4292601	4292539	4292547	656	10340.3	0	CDS	sRNA	GAGATCAATGTAATAACAGTATTTGTGCGGTTGCTGTTATGGAAAACGATAAAAAATCGCCATTAAAGATAATGGCGCAATCTGGATGAGACCTCTATGGCAAGGAAAACACTAC	TGTTTTCCTTGCCATAGACACCATCCCTGTCTTCCCCCACATGATGTGGGGGTTTTTTTTATC
nucD2(SL1344_2686).AS	ArcZ(ncRNA0002)	+	2870222	2870227	--	--	+	3511916	3511918	3511860	3511861	13	2987.24	2.65e-30	Antisense	sRNA	ACTCCTTTTAAGCACCAGGCCATTTC	ATTTCCCTGGTGTTGGCGCAGTATTCGCGCACCCCGGTCAAACCGGGGTCATTTTTTTT
nuoA(SL1344_2297)	rph(SL1344_3700)	-	2437258	2437304	2437224	2437227	-	3947959	3947967	3947996	3947999	12	1052.34	1.9e-32	5UTR	3UTR	TAGGGTTTTTTTTATTCCTCCCCATGAATCGATGTGGCGCCCATCTGCCGTAAAGAGCAGAGAAACTGGCGCTACTTTTGA	AAAATTGATTTTAAGGCGACTGAAAAGTCGCCTTTTTTTTG
nuoA(SL1344_2297)	RybD(ncRNA0062)	-	2437244	2437367	2437221	2437268	+	807416	807433	807383	807398	1023	383.114	0	5UTR	sRNA	GGTTATAGAAAGGAGTAAAAAACCACATCAATTAGCTGTTTTTATCATTTTCTACAGTAATTGTAGGGTTTTTTTTATTCCTCCCCATGAATCGATGTGGCGCCCATCTGCCGTAAAGAGCAGAGAAACTGGCGCTACTTTTGATGA	AAATGTCCGTTTTCGACATGGTTGGCCACCTTTACGGTGGCCTTTTTTATG
nuoA(SL1344_2297)	STnc740(ncRNA0194)	-	2437292	2437302	--	--	-	2240283	2240285	2240326	2240340	12	930.332	7.75e-32	5UTR	sRNA	GGGTTTTTTTTATTCCTCCCCATGAATCGAT	GCTAATAAAAAAGTAACATGGGGCTGTATTTCCCCCTCTGGATGAGGGGGCTTTTTTT
nuoA(SL1344_2297)	STnc940(ncRNA0211)	-	2437214	2437301	2437154	2437229	+	569047	569077	569012	569020	14	1270.13	1.08e-38	CDS	sRNA	GGTTTTTTTTATTCCTCCCCATGAATCGATGTGGCGCCCATCTGCCGTAAAGAGCAGAGAAACTGGCGCTACTTTTGATGAGTAAGCAATGAGTATGTCAACATCCACTGAAGTCATCGCTCATCACTGGGCATTCGCTATCTTTCTT	TTTAGCGGATGATTCATGATGTGAATAATTTCGCGCCGGTTTTTAAAACGGCGCGTACTTTTTTAG
nuoB(SL1344_2296).nuoC(SL1344_2295).IGR	ArcZ(ncRNA0002)	-	2436037	2436098	2436009	2436017	+	3511915	3511918	3511860	3511863	26	20.3923	1.16e-24	IGR	sRNA	GATTTAATTTGCGCCTGTCGGCAGCAGCACTTCACTTCGCTAACCACTATTTTAATAGCGCGAAGCACTGCCGACCACCACGGACCATTT	ATTTCCCTGGTGTTGGCGCAGTATTCGCGCACCCCGGTCAAACCGGGGTCATTTTTTTT
nuoN(SL1344_2285)	ArcZ(ncRNA0002)	-	2423225	2423301	2423174	2423253	+	3511914	3511917	3511860	3511862	29	8.66633	1.14e-17	CDS	sRNA	TACACCGGACTGGTGCTGCTGGCGAGCCTCGCCACCTGTACCTTTGCCTACCCGTGGCTGGAAGGCTATAACGATAACCAGGAAGAGTTCTACCTGCTGGTGTTAATCGCCAGCCTGGGCGGAATTCT	ATTTCCCTGGTGTTGGCGCAGTATTCGCGCACCCCGGTCAAACCGGGGTCATTTTTTT
nupG(SL1344_3088)	ArcZ(ncRNA0002)	+	3292253	3292285	3292304	3292309	+	3511913	3511919	3511858	3511865	124	1018.38	2.23e-263	CDS	sRNA	TTAAAATTTGACGGCGCATCTATTGGCGCAGTTTATAGTTCACTGGGGATTGCCGCC	CGATTTCCCTGGTGTTGGCGCAGTATTCGCGCACCCCGGTCAAACCGGGGTCATTTTTTTTC
ompA(SL1344_1010)	MicA(ncRNA0044)	-	1118372	1118410	1118338	1118351	+	2989474	2989505	2989428	2989438	14	331.855	7.58e-31	5UTR	sRNA	GTGAAGGATTTAACCGTGTTATCTCGTTGGAGATATTCATGGCGTATTTTGGATGATAACGAGGCGCAAAAAA	GAAAGACGCGCATTTGTTATCATCATCCCTGTTTTCAGCGATGAAATTTTGGCCACTCCGTGAGTGGCCTTTTTCTTT
ompC(SL1344_2237)	RybB(ncRNA0061)	-	2364348	2364366	2364323	2364326	-	941811	941878	941895	941909	55	634.74	1.89e-129	5UTR	sRNA	TGGTTAATGAGGGTTAACCAGTAAGCAGTGGCATAAAAAAGCAA	CATCAGTCATACCTATTGCCACTGCTTTTCTTTGATGTCCCCATTTTGTGGAGCCCATCAACCCCGCCATTTCGGTTCAAGGTTGGTGGGTTTTTTGTT
ompC(SL1344_2237)	STnc3530(ncRNA0393)	-	2364348	2364373	2364323	2364330	+	1564454	1564512	1564428	1564437	30	2974.61	4.08e-92	5UTR	sRNA	TGCCGACTGGTTAATGAGGGTTAACCAGTAAGCAGTGGCATAAAAAAGCAA	CCCAAAACTGTGTCACTGCTTAACCTTTATTATTGTTAATTTATTCTTTTATTATTTCAGGACGCTTCTGGCGTCCTTTTTTATT
ompC(SL1344_2237)	STnc2100(ncRNA0285)	-	2364315	2364324	--	--	+	3550962	3550968	3550908	3550914	12	2682.27	2.04e-37	5UTR	sRNA	AATAAAGGCATATAACAGAGGGTTAATAAC	ATAAGTAAACCCTCGTCGTCTAACCCGACGACTTGCCCCCGCCTGCCGGGGGCTTTTTTAT
ompC(SL1344_2237)	STnc970(ncRNA0213)	-	2364338	2364380	2364296	2364348	-	889559	889663	889615	889713	41	7461.54	3.38e-95	5UTR	sRNA	ATGGACTTGCCGACTGGTTAATGAGGGTTAACCAGTAAGCAGTGGCATAAAAAAGCAATAAAGGCATATAACAGAGGGTTAATAA	TACCTGCCCGCCAGATTTCAGGCTGTAACATCGCTGTTGTTTGAATTCTGACGGGTATTACCCTCGTCTGTTTGCCAACAGACCCACTGCTCCAACCCTCATTAACCCTGTTTGTTACCCTTATTTGCCCGTCCGTCACTGGACGGGCTTTTTTT
ompD(SL1344_1503)	ArcZ(ncRNA0002)	+	1612490	1612565	1612545	1612560	+	3511885	3511921	3511857	3511866	185	72.193	5.31e-169	CDS	sRNA	CGTAACACTGACTTCTTTGGCCTGGTTGAAGGTCTGAACTTTGCCGCGCAGTACCAGGGCAAAAACGACCG	ACGATTTCCCTGGTGTTGGCGCAGTATTCGCGCACCCCGGTCAAACCGGGGTCATTTTTTTTCCG
ompD(SL1344_1503)	InvR(ncRNA0023)	+	1611990	1612072	1612051	1612101	+	3067528	3067588	3067495	3067544	140	9.76198	8.7e-82	CDS	sRNA	GGAAACACGCTAAGAAAATTATAAGGATTATTAAAATGAAACTTAAGTTAGTGGCAGTGGCAGTGACTTCCCTGTTGGCAGCAGGCGTTGTAAATGCAGCCGAGGTATATAA	TATGGTCACTTTTACGGTTGGCCATTTGTCTCTTACGTTGCATTTATCAATCTGCTTTTTGATACAGCAGCACCTCGCTGCTGCTTTTTTTATT
ompD(SL1344_1503)	RybB(ncRNA0061)	+	1611990	1612047	1612046	1612081	-	941811	941877	941895	941948	104	340.841	2.02e-217	CDS	sRNA	GGAAACACGCTAAGAAAATTATAAGGATTATTAAAATGAAACTTAAGTTAGTGGCAGTGGCAGTGACTTCCCTGTTGGCAGCAGGCGTTGTA	TGAAAAAATTTTGCCAATAGGTCGAACTTTTCGTTAAAGCATCAGTCATACCTATTGCCACTGCTTTTCTTTGATGTCCCCATTTTGTGGAGCCCATCAACCCCGCCATTTCGGTTCAAGGTTGGTGGGTTTTTTGTT
ompD(SL1344_1503)	SL1344_0670(SL1344_0670)	+	1611991	1612056	1612052	1612084	+	750756	750784	750726	750734	55	1351.92	3.7e-149	CDS	3UTR	GAAACACGCTAAGAAAATTATAAGGATTATTAAAATGAAACTTAAGTTAGTGGCAGTGGCAGTGACTTCCCTGTTGGCAGCAGGCGTTGTAAAT	GCAATAAAACCCTGCCTTGCCACCCACGGGCGAATGTTTTCCGCCCGTGGTTTTTTCAG
ompD(SL1344_1503)	STnc3530(ncRNA0393)	+	1611991	1612033	1612055	1612064	+	1564457	1564511	1564428	1564431	10	274.932	1.19e-21	CDS	sRNA	GAAACACGCTAAGAAAATTATAAGGATTATTAAAATGAAACTTAAGTTAGTGGCAGTGGCAGTGACTTCCCTGT	CCCAAAACTGTGTCACTGCTTAACCTTTATTATTGTTAATTTATTCTTTTATTATTTCAGGACGCTTCTGGCGTCCTTTTTTAT
ompD(SL1344_1503)	STnc1010(ncRNA0214)	+	1611991	1612030	1612052	1612057	+	41675	41708	41647	41648	10	73.4784	5.7e-16	CDS	sRNA	GAAACACGCTAAGAAAATTATAAGGATTATTAAAATGAAACTTAAGTTAGTGGCAGTGGCAGTGACT	TATGCCACTTAGGGCGATGCCCACCTGATCCGGTCACTCTGTGCCGGATCAGGTTCTTTTAT
ompD(SL1344_1503)	STnc440(ncRNA0162)	+	1611955	1611980	1611999	1612027	+	4580542	4580564	4580509	4580524	14	332.369	1.36e-30	CDS	sRNA	TGCCATTGACAAACGCCTCGTTTAACAATGGTTGAGGAAACACGCTAAGAAAATTATAAGGATTATTAAAATG	CGTAACGGTAATTGTCCTCCTCATATTTGCGGCAGCGTAGTCTGCCGCTTTTTTTT
ompD(SL1344_1503)	STnc770(ncRNA0197)	+	1611956	1611986	1612007	1612010	-	3778183	3778186	3778323	3778325	13	1718.06	8.82e-38	CDS	sRNA	GCCATTGACAAACGCCTCGTTTAACAATGGTTGAGGAAACACGCTAAGAAAATTA	GTTATGAGTATGCGTGTTTCATTTACGGCCAGGAACGCTGATGATGACAACATTACTCCCTCTTTTCCGGGTACCTACATCATTCACTCCCTTTGACGGCGAGCGCTTCATCGGCGTCTGTTCGTCGTCTGGCCCCTTTTCTT
ompD(SL1344_1503)	STnc790(ncRNA0199)	+	1612093	1612095	--	--	-	4209499	4209503	4209537	4209543	11	451.594	5.06e-26	CDS	sRNA	GGTATATAACAAAGACGGCAATA	AGTTTAGTTGCCGTTTTTCCCGCCCGTCAGGGGCGGGTTTTTTCA
ompD(SL1344_1503)	STnc810(ncRNA0201)	+	1611990	1612033	1612050	1612064	-	4467934	4467978	4468025	4468037	32	1873.12	4e-92	CDS	sRNA	GGAAACACGCTAAGAAAATTATAAGGATTATTAAAATGAAACTTAAGTTAGTGGCAGTGGCAGTGACTTCCCTGT	GTTTTATCGAAGTACCTGCCCGGCAACGGGCAATGCCACTGCCCTCAAGTTATGTTATCCCCACTTATGGTCGTATTTTGGCGCTCTTCGGAGCGCTTTTTTTA
ompD(SL1344_1503)	STnc970(ncRNA0213)	+	1611990	1612058	1612057	1612086	-	889558	889698	--	889718	92	9087.17	2.46e-186	CDS	sRNA	GGAAACACGCTAAGAAAATTATAAGGATTATTAAAATGAAACTTAAGTTAGTGGCAGTGGCAGTGACTTCCCTGTTGGCAGCAGGCGTTGTAAATGC	TAATTTACCTGCCCGCCAGATTTCAGGCTGTAACATCGCTGTTGTTTGAATTCTGACGGGTATTACCCTCGTCTGTTTGCCAACAGACCCACTGCTCCAACCCTCATTAACCCTGTTTGTTACCCTTATTTGCCCGTCCGTCACTGGACGGGCTTTTTTTA
ompF(SL1344_0936)	ArcZ(ncRNA0002)	-	1047220	1047259	1047193	1047193	+	3511916	3511919	3511860	3511861	10	26.4118	2.08e-11	CDS	sRNA	GATTGGTTTTAAAGGGGAAACGCAGATTAACACCGATCTGACCGGTTTCGGTCAGTGGGAATACCGT	ATTTCCCTGGTGTTGGCGCAGTATTCGCGCACCCCGGTCAAACCGGGGTCATTTTTTTTC
ompF(SL1344_0936)	MicF(ncRNA0046)	-	1047220	1047293	1047199	1047237	+	2364715	2364723	2364665	2364670	59	1760.65	7.74e-154	CDS	sRNA	GCGATAGTAAAAATGCCGACCAGACTTATGCCCAGATTGGTTTTAAAGGGGAAACGCAGATTAACACCGATCTGACCGGTTTCGGTCAGTGGGAA	TTCTGAATGTCTGTTTACCCCTATTTCAACCGGATGCTTCGCATTCGGTTTTTTTTACC
ompH(SL1344_0226)	STnc870(ncRNA0205)	+	264806	264884	264899	264908	+	4292591	4292600	4292540	4292558	77	1807.32	5.42e-205	5UTR	sRNA	ATGCATTGGTAGTGTAGCGATGACTTTTGGCGATGCCCCCAGGGATCGCCAGGCCACGCAAAGAGCTGTACCTTCGGGTGCAAATGGGATGGTAAGGAGTTTA	GTTTTCCTTGCCATAGACACCATCCCTGTCTTCCCCCACATGATGTGGGGGTTTTTTTTAT
ompR(SL1344_3469)	RprA(ncRNA0058)	-	3681897	3681904	--	--	-	1401682	1401686	1401729	1401732	24	3701.21	1.95e-73	5UTR	sRNA	GTGAGCTTTTTTAAGAATACACACTTAC	GAATTGCTGTGTGTAGTCTTTGCCCGTCTCCTACGATGGGCTTTTTTTTTA
ompX(SL1344_0808)	CyaR(ncRNA0009)	+	898699	898782	898791	898868	+	2228913	2228933	2228856	2228893	2951	1158.82	0	CDS	sRNA	AGGCGCCCTTAGACACCGTGAATCGCAAAGAGTTTCCCATTAATTTTTGATATATTTAAAACTTAGGACTTACTTGAAGCACATTTGAGGTGGTTATGAAAAAAATTGCATGTCTTTCAGCACTGGCCGCTGTTCTGGCTTTTTCCGCAGGTACTGCAGTAGCTGCTACT	ATAACCCATAAATGCTAGCTGTACCAGGAACCACCTCCTTGGCCTGCGTAATCTCCCTTACGCAGGCTTATTTTTTGC
ompX(SL1344_0808)	CyaR(ncRNA0009)	+	898760	898781	898793	898805	+	2228893	2228911	2228863	2228878	214	394.628	0	5UTR	sRNA	CTTAGGACTTACTTGAAGCACATTTGAGGTGGTTATGAAAAAAATT	ATAAATGCTAGCTGTACCAGGAACCACCTCCTTGGCCTGCGTAATCTCC
oppA(SL1344_1677)	DapZ(ncRNA0010)	-	1798090	1798108	1798069	1798069	+	74914	74925	74846	74853	22	462.521	2.68e-50	CDS	sRNA	AGTGGAGTACAAACACAATGTCTAACATCACGAAAAAAAG	AAATACCTTCGTGATGTGGTTGTGGTAATCAAGATTAATTGATTACAAAGGGCAATATATTATTGCCCTTTTGTTTTTGC
oppA(SL1344_1677)	STnc870(ncRNA0205)	-	1796444	1796481	1796414	1796427	+	4292591	4292599	4292541	4292543	19	425.993	2e-42	3UTR	sRNA	CTTATATATTATCAAACATTAATGGCAAGACATGGGACAACTGCGGTTGTCCCATGGTGTCTTTTTTC	TTTTCCTTGCCATAGACACCATCCCTGTCTTCCCCCACATGATGTGGGGGTTTTTTTTA
oraA(SL1344_2808)	ArcZ(ncRNA0002)	-	2997048	2997108	2997024	2997024	+	3511914	3511918	3511859	3511862	19	396.922	6.56e-38	CDS	sRNA	CTTGATGACGAGCGCTTCGTGATGCGCTTTATCGCCAGTCGTAGCCGCAAAGGCTATGGCCCGGCGCGTATTCGCCAGGAGTTGA	GATTTCCCTGGTGTTGGCGCAGTATTCGCGCACCCCGGTCAAACCGGGGTCATTTTTTTT
orgAa(SL1344_2850)	ArcZ(ncRNA0002)	-	3037257	3037264	3037232	3037232	+	3511914	3511918	3511859	3511862	84	201.158	1.23e-146	CDS	sRNA	AGCATTTTTGGCAATGCATCAGGGAACAAGTTT	GATTTCCCTGGTGTTGGCGCAGTATTCGCGCACCCCGGTCAAACCGGGGTCATTTTTTTT
orgAb(SL1344_2849)	ArcZ(ncRNA0002)	-	3036568	3036610	3036539	3036551	+	3511895	3511921	3511858	3511875	609	1912.68	0	CDS	sRNA	TGGTGTTGCTTATGGAGAACTGGCCAGGCACTTTTAATCTTAAATATCACCAGGAACAGCGCTTTATCATGA	CGATTTCCCTGGTGTTGGCGCAGTATTCGCGCACCCCGGTCAAACCGGGGTCATTTTTTTTCCG
pagC(SL1344_1184).SL1344_1185(SL1344_1185).IGR	ArcZ(ncRNA0002)	+	1290497	1290576	1290623	1290632	+	3511913	3511917	3511859	3511863	17	61.0389	6.61e-24	IGR	sRNA	GTCTTTTTACATCAGGTGGGCAAGCATAATGCAGGTTAACTTGAAAGATACGATCAATAGCAGAAACCAGTGATTTCGTTTATGGCCTGGGGATTTAACCGCGCCAGAGCGTATGCAAGACCCTGGCGCGGTTGGC	GATTTCCCTGGTGTTGGCGCAGTATTCGCGCACCCCGGTCAAACCGGGGTCATTTTTTT
pagO(SL1344_1793)	STnc870(ncRNA0205)	+	1917052	1917058	1917090	1917093	+	4292591	4292600	--	--	16	25466.5	9.98e-51	CDS	sRNA	ATTTTTTTACGGAGAGGATCTTATGCGCAAGGTGTCGATATC	TCCCCCACATGATGTGGGGGTTTTTTTTAT
parC(SL1344_3148)	STnc440(ncRNA0162)	-	3359830	3359912	3359873	3359874	+	4580558	4580565	4580492	4580498	12	210.316	3.68e-24	CDS	sRNA	GTTAATGAGCGATATGGCAGAGCGCCTTGCGCTACATGAA	ATTACTTTGTGGTGTAGCGTAACGGTAATTGTCCTCCTCATATTTGCGGCAGCGTAGTCTGCCGCTTTTTTTTA
pgi(SL1344_4157)	ArcZ(ncRNA0002)	+	4462597	4462641	4462604	4462680	+	3511913	3511919	3511809	3511863	72	258.611	2.5e-131	CDS	sRNA	CAACGGTCAGCACGCGTTTTATCAATTGATTCACCAGGGTACTAAAATGGTGCCGTGTGATTTTATCGCCCCGGCTATCACCCA	AAAACAGGACTGCGCCTTTGACATCATCATAATAAGCACGGCGCAGCCACGATTTCCCTGGTGTTGGCGCAGTATTCGCGCACCCCGGTCAAACCGGGGTCATTTTTTTTC
pheA(SL1344_2625)	RydC(ncRNA0064)	+	2808610	2808666	2808686	2808686	+	1686573	1686590	1686525	1686525	23	51.3585	1.12e-30	CDS	sRNA	AACAAGAAGGCCTCCCCCACCGGGAGGCCTTTTTTATTGATAACAAAAAAGGCAACACTATGACATCGGAAAACCCA	CTTCCGATGTAGACCCGTCCTCCTTCGCCTGCGTCACGGGTCCTGGTTAGACGCAGGCGTTTTCTG
pheS(SL1344_1271)	STnc870(ncRNA0205)	+	1373396	1373417	1373438	1373441	+	4292595	4292599	4292541	4292550	14	197.178	2.16e-27	CDS	sRNA	CTATTCTGGCTTCGCTTTTGGTATGGGGATGGAACGTCTGACCATG	TTTTCCTTGCCATAGACACCATCCCTGTCTTCCCCCACATGATGTGGGGGTTTTTTTTA
phnA(SL1344_4226)	RybD(ncRNA0062)	-	4551802	4551811	4551781	4551781	+	807417	807432	807389	807395	22	104.833	3.24e-36	5UTR	sRNA	CTTTTTGAGGATACCAACATGTCATTACCCC	CCGTTTTCGACATGGTTGGCCACCTTTACGGTGGCCTTTTTTAT
phnA(SL1344_4226)	STnc440(ncRNA0162)	-	4551788	4551858	4551754	4551798	+	4580518	4580567	4580483	4580525	52	280.276	1.08e-73	CDS	sRNA	GCCTTTTTCGGCGATCTGCCATTTTTGGGCGCGTTTGCCCCCGCTGACTTTTTGAGGATACCAACATGTCATTACCCCACTGCCCGCAATGTAACTCCGAATATA	CAGTAACGGATTACTTTGTGGTGTAGCGTAACGGTAATTGTCCTCCTCATATTTGCGGCAGCGTAGTCTGCCGCTTTTTTTTATA
phoH(SL1344_1064).AS	ArcZ(ncRNA0002)	-	1171264	1171287	1171238	1171244	+	3511913	3511918	3511858	3511862	16	735.336	3.08e-34	Antisense	sRNA	CATTTTCATTTGCGCCGCAGTCACATTTTGCGCCTCATCGAGGATCACGA	CGATTTCCCTGGTGTTGGCGCAGTATTCGCGCACCCCGGTCAAACCGGGGTCATTTTTTTT
phoP(SL1344_1169)	ArcZ(ncRNA0002)	-	1276239	1276252	1276214	1276217	+	3511913	3511919	3511859	3511866	114	970.86	2.32e-241	5UTR	sRNA	GCTAGACTGTTCTTATTGTTAACACAAGGGAGAAGAGAT	GATTTCCCTGGTGTTGGCGCAGTATTCGCGCACCCCGGTCAAACCGGGGTCATTTTTTTTC
pipD(SL1344_1033)	ArcZ(ncRNA0002)	-	1137655	1137666	1137617	1137626	+	3511915	3511917	3511861	3511861	10	459.567	6.87e-21	CDS	sRNA	ACCACCTATAATTATCCGCGCGTCTGGACGCTACAACACCAGTTTAATCC	TTTCCCTGGTGTTGGCGCAGTATTCGCGCACCCCGGTCAAACCGGGGTCATTTTTTT
pitA(SL1344_3554)	MgrR(ncRNA0043)	+	3779789	3780071	3779851	3780279	+	1550820	1550848	1550760	1550810	2178	993.943	0	CDS	sRNA	TCATGTCCTCAAAATGGCGTAACGTCCTATGCTACATTTGTTTGCTGGCCTGGATTTACATACCGGGCTTTTATTATTGCTTGCTCTGGCTTTTGTGCTGTTCTACGAAGCGATTAACGGCTTCCATGACACAGCCAATGCAGTCGCAACCGTGATTTACACCCGTGCGATGCGTTCGCAGCTGGCGGTTGTCATGGCGGCGGTGTTTAACTTTTTTGGCGTTTTGCTGGGGGGTCTCAGCGTGGCGTATGCCATTGTGCATATGCTACCGACGGATCTCCTGCTCAACATGGGTTCCGCGCACGGCCTCGCTATGGTCTTTTCCATGTTGCTGGCGGCGATTATCTGGAACCTCGGTACCTGGTATTTCGGGTTGCCGGCGTCCAGTTCCCACACGCT…	CAAGAATTTGCCCGGTAGCGTATAAGCAAAACACAAATCTATCCATGCAAGCATTTACCGCTGGTGAACCGGCGGTTTTTTTTTGCCTG
pitA(SL1344_3554)	MgrR(ncRNA0043)	+	3779749	3779787	3779878	3779879	+	1550821	1550845	1550759	1550805	316	364.638	0	5UTR	sRNA	CTTTGCCCGCGCCGCCAAAGTCACTGATAATGCGCCGCGTTCATGTCCTCAAAATGGCGTAACGTCCTATGCTACATTTGTTTGCTGGCCTGGATTTACATACCGGGCTTTTATTATTGCTTGCTCTGGCT	GCAAGAATTTGCCCGGTAGCGTATAAGCAAAACACAAATCTATCCATGCAAGCATTTACCGCTGGTGAACCGGCGGTTTTTTTTTGC
pitA(SL1344_3554)	SLnc0022(ncRNA0383)	+	3779811	3779859	3779883	3779887	+	2073334	2073339	2073265	2073269	16	234.281	1.25e-32	5UTR	sRNA	CGTCCTATGCTACATTTGTTTGCTGGCCTGGATTTACATACCGGGCTTTTATTATTGCTTGCTCTGGCTTTTGTGCT	AAGATACCTGTAGCCAGTGCAAGCGATATTCTGGCGGCCCGTTCCATTACGTTAGCGGAAACCGCCAGCTTTTTC
plsX(SL1344_1129)	ArcZ(ncRNA0002)	+	1232794	1232838	1232849	1232862	+	3511913	3511919	3511859	3511862	67	280.023	7.72e-124	CDS	sRNA	TTTGGCGGAAGAGGTCGTCGGGATCAAAAATCCCCGCGTGGCGCTACTCAATATCGGGGAAGAAGAAAC	GATTTCCCTGGTGTTGGCGCAGTATTCGCGCACCCCGGTCAAACCGGGGTCATTTTTTTTC
pnp(SL1344_3255)	Spf(ncRNA0075)	-	3472074	3472111	3471913	3472068	+	4230535	4230612	4230537	4230554	54	5.1837	6.21e-21	CDS	sRNA	GTCAAAAATTGGAAAGGATATTATTTTGCTTAATCCGATCGTTCGTAAATTCCAGTACGGTCAGCATACCGTTACGCTGGAAACTGGCATGATGGCGCGTCAGGCCACTGCCGCTGTTATGGTAAGCATGGATGACACCGCCGTATTCGTTACCGTTGTCGGCCAGAAAAAAGCCAAGCCAGGCCAGGACTTCTTCCCA	ACCTTTTACTTCACGTAATCGGATTTGGCTGAATATTTTAGCCGCCCCAGTCAGTTTATGACTGGGGCGTTTTTTA
pnp(SL1344_3255).SL1344_3254(SL1344_3254).IGR	ArcZ(ncRNA0002)	-	3469895	3469995	3469874	3469913	+	3511883	3511921	3511859	3511865	405	632.481	0	IGR	sRNA	CCTGCGGCTGCGCCGGAAGCTCCGGCGAGCGAACAGGCCGAGTAAGGTAGCCTTTTGCCCTCCGCAGTGCGGAGGGCTTTAGACCTGGCTGGACGCCTTGTTGAGCCACCGGGGAACAGGAC	GATTTCCCTGGTGTTGGCGCAGTATTCGCGCACCCCGGTCAAACCGGGGTCATTTTTTTTCCG
pntB(SL1344_1410)	ArcZ(ncRNA0002)	+	1514123	1514168	1514192	1514192	+	3511914	3511917	3511860	3511862	13	50.6311	1.06e-17	CDS	sRNA	TGCCGCGATCCTGTTTATTTTCAGTCTTGCCGGGCTTTCAAAGCATGAAACGTCCCGCCAGGGGAATAAC	ATTTCCCTGGTGTTGGCGCAGTATTCGCGCACCCCGGTCAAACCGGGGTCATTTTTTT
pocR(SL1344_2012)	ArcZ(ncRNA0002)	-	2112341	2112342	--	--	+	3511915	3511918	3511859	3511863	10	765.944	6.6e-22	CDS	sRNA	TATTCAAGAAATATCAGGGAAT	GATTTCCCTGGTGTTGGCGCAGTATTCGCGCACCCCGGTCAAACCGGGGTCATTTTTTTT
potD(SL1344_1159)	RybD(ncRNA0062)	-	1264630	1264697	1264599	1264599	+	807425	807433	807392	807394	21	1227.47	8.51e-53	CDS	sRNA	TCGACCTACGAGTCGAACGAAACCATGTATGCCAAACTCAAAACCTATAAAGATGGCGCGTATGACCTGGTTGTTCCTTCTACATACTATGTCGACAAA	TTTTCGACATGGTTGGCCACCTTTACGGTGGCCTTTTTTATG
ppiC(SL1344_3870)	DapZ(ncRNA0010)	-	4140520	4140550	4140489	4140505	+	74921	74924	74845	74860	30	758.351	5.84e-74	CDS	sRNA	CCAACCGGCCCGCTGCATACCCAGTTCGGTTACCACATCATTAAGGTATTGTATCGTAAATA	TAAATACCTTCGTGATGTGGTTGTGGTAATCAAGATTAATTGATTACAAAGGGCAATATATTATTGCCCTTTTGTTTTTG
ppiC(SL1344_3870)	InvR(ncRNA0023)	-	4140791	4140799	4140760	4140764	+	3067536	3067586	3067499	3067524	67	267.706	7.92e-102	5UTR	sRNA	GGCCAATCTTTGCGACGTGAGAACACAATAATGGCAAAAA	GTCACTTTTACGGTTGGCCATTTGTCTCTTACGTTGCATTTATCAATCTGCTTTTTGATACAGCAGCACCTCGCTGCTGCTTTTTTTA
pps(SL1344_1283)	ArcZ(ncRNA0002)	+	1385109	1385178	1385159	1385213	+	3511883	3511919	3511859	3511862	238	298.175	0	CDS	sRNA	TATTTGCTTCTCTGTTTAACGATCGCGCCATCTCTTATCGCGTTCACCAGGGATATGATCATCGCGGCGTAGCGCTTTCCGCTGGCGTGCAGCGGATGGTTCGCT	GATTTCCCTGGTGTTGGCGCAGTATTCGCGCACCCCGGTCAAACCGGGGTCATTTTTTTTC
pqiA(SL1344_1003).AS	ArcZ(ncRNA0002)	-	1110522	1110542	1110498	1110501	+	3511915	3511918	3511859	3511861	12	689.359	7.85e-26	Antisense	sRNA	GGCTGGCGTAATCTTCAGAAAACATGACGCCGGGGATTTCCAGAA	GATTTCCCTGGTGTTGGCGCAGTATTCGCGCACCCCGGTCAAACCGGGGTCATTTTTTTT
prgH(SL1344_2854)	ArcZ(ncRNA0002)	-	3040071	3040080	--	--	+	3511915	3511918	3511860	3511862	13	13.5168	5.63e-11	CDS	sRNA	GAGAAGACGATAACAAGCCCAGGGCCATAC	ATTTCCCTGGTGTTGGCGCAGTATTCGCGCACCCCGGTCAAACCGGGGTCATTTTTTTT
prgH(SL1344_2854)	STnc440(ncRNA0162)	-	3039054	3039084	3039029	3039032	+	4580542	4580567	4580509	4580521	118	952.219	7.35e-295	CDS	sRNA	AGAGCCCGTCAATTTGTCGATAGCTATTACCGCACATGGGGAGGACGCTATGTGCA	CGTAACGGTAATTGTCCTCCTCATATTTGCGGCAGCGTAGTCTGCCGCTTTTTTTTATA
prgI(SL1344_2853)	ArcZ(ncRNA0002)	-	3038896	3038909	3038871	3038878	+	3511913	3511919	3511836	3511862	87	101.016	7.7e-132	CDS	sRNA	TAAATAAGGAAGTCATTATGGCAACACCTTGGTCAGGCT	CATAATAAGCACGGCGCAGCCACGATTTCCCTGGTGTTGGCGCAGTATTCGCGCACCCCGGTCAAACCGGGGTCATTTTTTTTC
prlA(SL1344_3387)	rpsE(SL1344_3390)	-	3607949	3608068	3607922	3607934	-	3609599	3609668	3609681	3609759	39	282.623	3.67e-56	CDS	CDS	TATGCTGCACAGAGCACACATTTACCGCTGAAAGTGAATATGGCGGGGGTAATCCCGGCAATCTTCGCTTCCAGTATTATTCTGTTCCCGGCGACCATCGCGTCATGGTTCGGGGGCGGTACTGGTTGGAACTGGCTGACAACAATT	GATTAACGTCGCGCTGAACAACGGCACCCTGCAGCACCCGGTTAAAGGTGTTCACACGGGGTCTCGTGTATTCATGCAGCCAGCTTCCGAAGGTACCGGTATCATCGCCGGTGGTGCAATGCGCGCCGTTCTGGAAGTTGCTGGGGTTCATAACGTTCTGG
proB(SL1344_0317)	STnc790(ncRNA0199)	+	365751	365767	365789	365792	-	4209499	4209520	4209537	4209544	28	17793.4	7.06e-106	5UTR	sRNA	TTCATTTGGTCTTTATTTCTTATTTTGAACGGCAGAGAATCA	CAGTTTAGTTGCCGTTTTTCCCGCCCGTCAGGGGCGGGTTTTTTCA
pstS(SL1344_3824)	MgrR(ncRNA0043)	-	4084930	4085010	--	--	+	1550814	1550844	1550787	1550800	16	149.159	1.33e-28	CDS	sRNA	GCGCTAAGCAGGCGAATGATCTGGACTACGCCAGCCTGCCGGATAACGTTGTTGAGCAGGTTCGTGCTGCATGGAAGACCAGTATAAAAGACAGCAACGGT	AAAACACAAATCTATCCATGCAAGCATTTACCGCTGGTGAACCGGCGGTTTTTTTTTG
ptr(SL1344_2973)	ArcZ(ncRNA0002)	-	3174356	3174361	--	--	+	3511915	3511917	3511859	3511865	22	1263.91	1.5e-48	5UTR	sRNA	GATACTTTACAGAAGGCCAGGACAAA	GATTTCCCTGGTGTTGGCGCAGTATTCGCGCACCCCGGTCAAACCGGGGTCATTTTTTT
ptsG(SL1344_1140)	SgrS(ncRNA0071)	+	1242406	1242470	1242505	1242509	+	128813	128816	128733	128733	12	236.337	6.88e-25	5UTR	sRNA	ATAAATAAAAGGGCACTTAGATGTCCTGTCCACGGCGGGGTTCTCCCCCCTCGCCAATGCGTGAGAACGTAGAAAAGCACAAATACTCAGGAGCACTCTCAATT	CAGACATCATGTGTGACTGAGTATTGGTGTAGGCGATAGCCTAAAATCACCCGCCAGCAGATAATATCTGCTGGCTTTTTTTAT
ptsH(SL1344_2394)	STnc810(ncRNA0201)	+	2542112	2542148	2542163	2542175	-	4467934	4467939	4467973	4467984	24	2615.55	5.9e-73	5UTR	sRNA	CTTCCTTTCGCGGCATAATGTTTAATGACGAGCGAAACGTCAGCGGCCATAAGTTGCCAGCAAC	GTTATCCCCACTTATGGTCGTATTTTGGCGCTCTTCGGAGCGCTTTTTTTA
purA(SL1344_4299)	ArcZ(ncRNA0002)	+	4629755	4629767	4629787	4629793	+	3511914	3511917	3511860	3511862	30	62.6762	2.55e-41	CDS	sRNA	GGCTAAATATGTTGTACGCTACCAGGGCGGTCACAACGC	ATTTCCCTGGTGTTGGCGCAGTATTCGCGCACCCCGGTCAAACCGGGGTCATTTTTTT
pykA(SL1344_1822)	ArcZ(ncRNA0002)	+	1939892	1940004	1939965	1940034	+	3511913	3511921	3511859	3511866	596	2100.98	0	5UTR	sRNA	AATTACTCATCAAGAGTGATGACCGCTAAAAGCAATAACAATGTTCTACCCTTTTCGTCATCCGGGGACGTTCATTTTATACCGTTAAGGTTTCAGAACGACCGGATCAATGTTCACGCAACACCAAGTTGTTTTAGTCAACG	GATTTCCCTGGTGTTGGCGCAGTATTCGCGCACCCCGGTCAAACCGGGGTCATTTTTTTTCCG
pykA(SL1344_1822)	ArcZ(ncRNA0002)	+	1940295	1940303	1940327	1940327	+	3511914	3511918	3511860	3511862	29	208.267	5.59e-52	CDS	sRNA	CAAAGTGTTCCTCAACATCGGGGACAAATTTCT	ATTTCCCTGGTGTTGGCGCAGTATTCGCGCACCCCGGTCAAACCGGGGTCATTTTTTTT
pykF(SL1344_1312)	ArcZ(ncRNA0002)	-	1418249	1418286	1418227	1418231	+	3511914	3511919	3511859	3511862	21	209.817	4.32e-38	5UTR	sRNA	AGGCATCATCACTTTAGCAACACAGGCTTAGCTTCCGGGCCGTGCGCGCCCGAAGCCAGA	GATTTCCCTGGTGTTGGCGCAGTATTCGCGCACCCCGGTCAAACCGGGGTCATTTTTTTTC
pyrD(SL1344_0998)	ArcZ(ncRNA0002)	+	1103251	1103254	--	--	+	3511914	3511917	3511859	3511861	14	153.193	1.75e-24	CDS	sRNA	CGGTTTGCACACCGGGAATCCAGG	GATTTCCCTGGTGTTGGCGCAGTATTCGCGCACCCCGGTCAAACCGGGGTCATTTTTTT
ratB(SL1344_2475)	ArcZ(ncRNA0002)	-	2636236	2636285	2636215	2636223	+	3511913	3511918	3511860	3511862	26	314.473	8.11e-50	CDS	sRNA	GCGGCAATCCGCTGCCGCAAGCGCCGTTCGTGTTAAGCCGCGGCGACGGCTATACCCGCCAGGGGGAGAAA	ATTTCCCTGGTGTTGGCGCAGTATTCGCGCACCCCGGTCAAACCGGGGTCATTTTTTTT
rbsK(SL1344_3852)	GcvB(ncRNA0014)	+	4116793	4116848	4116863	4116904	+	3156944	3156986	3156844	3156925	21	10.3519	1.75e-14	5UTR	sRNA	GACACGGGTCAACTATGGCCTGATGGCGACAGAAATACGCGAGCCTCCGCTGAGGTGAACGTAAAAAAAAGAAAAGCAGGGCACGCGCCACCCTAACCGGTGGCGCACTTTG	GTGATGTTGTGTTGTTGTGTTTGCAATTGGTCTGCGATTCAGACCACGGTAGCGAGACTACCCTTTTTCACTTCCTGTACATTTACCCTGTCTGTCCATAGTGATTAATGTAGCACCGCCATATTGCGGTGCTTTTTTTTGTA
rbsK(SL1344_3852)	STnc870(ncRNA0205)	+	4116821	4116880	4116879	4116903	+	4292578	4292598	4292530	4292561	11	71.1549	3.4e-17	5UTR	sRNA	ACAGAAATACGCGAGCCTCCGCTGAGGTGAACGTAAAAAAAAGAAAAGCAGGGCACGCGCCACCCTAACCGGTGGCGCACTTT	TAACAACCCTGTTTTCCTTGCCATAGACACCATCCCTGTCTTCCCCCACATGATGTGGGGGTTTTTTTT
rcsB(SL1344_2239)	RprA(ncRNA0058)	+	2367725	2367818	2367826	2367838	-	1401683	1401687	1401728	1401732	25	1011.05	1.64e-32	CDS	sRNA	TAATTATTGCCGATGACCACCCGATTGTACTGTTCGGTATTCGCAAATCACTTGAACAAATCGAGTGGGTGAATGTTGTCGGCGAATTTGAAGATTCCACAGCATTGATCAACA	GAATTGCTGTGTGTAGTCTTTGCCCGTCTCCTACGATGGGCTTTTTTTTT
recJ(SL1344_3018).prfB(SL1344_3017).IGR	STnc2000(ncRNA0278)	-	3222722	3222724	3222594	3222651	-	1204288	1204289	1204320	1204341	13	12770.6	1.97e-47	IGR	sRNA	GAGTTTCGCGGCAACCGTAGTTTACAGATTATTATCGATGATATTTGGCCGCTATGATCGGGGCGATTTAACAACACTTTCGCTGTAATTAAGGGGCGAAATCCGCTAATATTTCGCCCTTATAACCGCAT	GAATAAAAAATGATATGCAGTGATGTATGTTTGCCGGGTCGCCCCGGCTTTTTT
recN(SL1344_2656)	ArcZ(ncRNA0002)	+	2834935	2834948	2834979	2834992	+	3511914	3511918	--	--	16	94.2737	3.92e-25	CDS	sRNA	GCTACCAATTATGGCATCAAAGCTGCCGCGATCTCGCCCATCACCAGCAACAAAGCCA	CGGTCAAACCGGGGTCATTTTTTTT
relA(SL1344_2937)	ArcZ(ncRNA0002)	-	3126520	3126570	3126493	3126504	+	3511914	3511919	3511860	3511863	33	61.1611	5.49e-45	CDS	sRNA	GCGGTAAGAAGTGCACATATTAATAAAGCTGGTGAATTTGATCCGAAGAAGTGGATCGCAAGCCTGGGAATTTCCAGC	ATTTCCCTGGTGTTGGCGCAGTATTCGCGCACCCCGGTCAAACCGGGGTCATTTTTTTTC
rfaH(SL1344_3931).AS	ArcZ(ncRNA0002)	+	4204903	4204929	4204955	4204955	+	3511914	3511917	3511861	3511861	10	328.262	4.42e-20	Antisense	sRNA	CTGAGCACGCTGAAGTTGCCCGCGTTTGCAGTACAGTAAATACCAGGATTGCA	TTTCCCTGGTGTTGGCGCAGTATTCGCGCACCCCGGTCAAACCGGGGTCATTTTTTT
rfaL(SL1344_3679)	ArcZ(ncRNA0002)	+	3930408	3930417	3930439	3930439	+	3511916	3511918	3511860	3511863	35	2681.25	1.61e-79	CDS	sRNA	ATCGTTATACTAACGGAACCCAGGGCACCGCG	ATTTCCCTGGTGTTGGCGCAGTATTCGCGCACCCCGGTCAAACCGGGGTCATTTTTTTT
rfbA(SL1344_2072)	ArcZ(ncRNA0002)	-	2173532	2173569	2173509	2173516	+	3511914	3511918	3511859	3511862	65	1245.11	8.52e-141	CDS	sRNA	AGTTTGATAGAGGCCAGTAATTTTATTGCAACCATCGAAGAACGCCAGGGGCTAAAAGTGT	GATTTCCCTGGTGTTGGCGCAGTATTCGCGCACCCCGGTCAAACCGGGGTCATTTTTTTT
rfbJ(SL1344_2066)	ArcZ(ncRNA0002)	-	2167930	2167977	2167906	2167906	+	3511913	3511918	3511859	3511862	22	1685.21	2.32e-49	CDS	sRNA	TATATTAGAAAATAGAAAAGAAGTACCTTCATATACTGAGTATCAAGTTGGAACTGGTGCTGGGGTAAGTTT	GATTTCCCTGGTGTTGGCGCAGTATTCGCGCACCCCGGTCAAACCGGGGTCATTTTTTTT
rfbJ(SL1344_2066)	STnc870(ncRNA0205)	-	2168120	2168154	2168094	2168094	+	4292576	4292599	4292542	4292556	16	5093.3	1.19e-47	CDS	sRNA	CATTTCATTTGTAAACATGCGATTAGAGCATGTATATGGGCCTGGGGATGGTGAAAATAAA	TTTCCTTGCCATAGACACCATCCCTGTCTTCCCCCACATGATGTGGGGGTTTTTTTTA
rfbU(SL1344_2063)	FnrS(ncRNA0013)	-	2164364	2164393	2164333	2164338	-	1706781	1706786	1706826	1706843	15	98.9476	2.74e-22	CDS	sRNA	AGTTTGGTCTGACTCTTATAATTTAATTATTGTATGTGGTCGTACTGACTATGCAATGTCT	GAATTACTGCATAGCACAATTGATTCGTACGACGCCGACTTAGATTAGTCGGCTTTTTTTTGC
rfbV(SL1344_2064)	ArcZ(ncRNA0002)	-	2165725	2165749	2165703	2165703	+	3511913	3511917	3511860	3511861	18	91.9181	6.24e-28	CDS	sRNA	CATGTATTTATCATGATGAGCGTATTTAATACGCCAGGGTGCCTTTT	ATTTCCCTGGTGTTGGCGCAGTATTCGCGCACCCCGGTCAAACCGGGGTCATTTTTTT
rfbV(SL1344_2064).rfbU(SL1344_2063).IGR	glmS(SL1344_3828)	-	2165136	2165175	2165109	2165112	-	4090295	4090318	4090339	4090359	23	49354.4	3.77e-97	IGR	3UTR	AGTATAATAATATATTTCTTTATGATTGTTTTTGTAGTGTTTTACTGCCGGTATTACATTAACTCTA	GTTACCGTAGAGTAAGTACAAATGTAGTACCAGGCAGAAGGCCGTCGACAGACGGCCTTTTTTTG
rfbX(SL1344_2065)	ArcZ(ncRNA0002)	-	2166951	2167570	2166921	2167471	+	3511913	3511919	3511859	3511863	106	373.437	2.77e-80	CDS	sRNA	CCAAAATAATAATTGCCGGGGTGCAGTTAGCAAGTATTTCATATCTTATTTCTATACTAGGTGAAGAGAAATATGCAATCTTTAGTTTGTTAACTGGTTTATTAGTATGGTGTAGCGCTGTTGATTTTGGCATAGGTACAGGACTGCAAAATTATATATCAGAATGCAGAGCCAAAAACAAAAGTTATGATGCATATATTAAATCAGCATTACATCTAAGCTTTATAGCTATTATTTTTTTTATTGCTTTATTTTATATTTTTTCTGGGGTAATTTCCGCTAAATATCTTTCTTCTTTTCATGAGGTATTACAGGACAAAACCAGAATGCTCTTTTTTACCTCATGTCTGGTTTTCAGTTCTATTGGAATCGGAGCTATTGCTTATAAAATACTTTTTG…	GATTTCCCTGGTGTTGGCGCAGTATTCGCGCACCCCGGTCAAACCGGGGTCATTTTTTTTC
rfbX(SL1344_2065)	CyaR(ncRNA0009)	-	2167574	2167605	2167534	2167541	+	2228929	2228931	--	--	18	85.0771	1.83e-27	CDS	sRNA	GAGTCATTTAATTGTTGCAGGTTCATCATGGTTATCCAAAATAATAATTGCCGGGGTGCAGTTAGCAAGTAT	TCCCTTACGCAGGCTTATTTTTT
rfc(SL1344_1266)	MgrR(ncRNA0043)	-	1367623	1367641	1367599	1367602	+	1550821	1550843	1550795	1550796	12	592.872	2.93e-27	CDS	sRNA	TTTATTTAACTGTATACTTATTTTCTTGCATGGTAACAAAGGA	AATCTATCCATGCAAGCATTTACCGCTGGTGAACCGGCGGTTTTTTTTT
rfe(SL1344_3877)	ArcZ(ncRNA0002)	+	4148695	4148736	4148755	4148778	+	3511914	3511918	3511861	3511862	51	260.491	1.32e-93	CDS	sRNA	GTAGCCATAAAAATTGGTTTAGTGGATAAACCAAACTTTCGTAAACGACATCAGGGCGTTATCCCATTAGTCGGCGGGATTTCT	TTTCCCTGGTGTTGGCGCAGTATTCGCGCACCCCGGTCAAACCGGGGTCATTTTTTTT
rnb(SL1344_1633)	MgrR(ncRNA0043)	+	1753041	1753083	1753104	1753130	+	1550814	1550844	1550758	1550801	32	14.6425	5.15e-26	CDS	sRNA	AGACGGTTTATAAAGTGACGGATGTCATTGATGTCACTATTGCGGAAGTTCGCATGGAAACCCGCAGCATTATTGCCCGACCGGCAGCGT	CGCAAGAATTTGCCCGGTAGCGTATAAGCAAAACACAAATCTATCCATGCAAGCATTTACCGCTGGTGAACCGGCGGTTTTTTTTTG
rpl19(SL1344_2646)	rps16(SL1344_2649)	-	2826015	2826207	2825988	2826112	-	2827996	2828087	2828070	2828145	56	573.878	6.59e-80	3UTR	5UTR	CGAAGGCGTTGAGCGTGTCTTCCAGACTCACTCTCCGGTAGTTGACAGCATTGCTGTTAAACGTCGTGGTGCTGTTCGTAAAGCTAAACTGTACTACCTGCGTGAGCGTACTGGTAAAGCGGCTCGTATCAAAGAGCGTCTTAACTGATAACGCATTCACGCTACATCCAAAGCGTGTTGTAAAACAAGGGGTTAGCGAATTGCTGACCCCTTTTTTATT	GGCTTTTAATATGACGCCGGGCTCCGTTCCTCGATGGGGCCCGGTTGTTTTATTCACACAAGAGGATGTTATGGTAACTATTCGTTTAGCTCGTCACGGCGCTAAAAAGCGTCCGTTCTACCAGGTTGTTGTCACCGACAGCCGTAATGC
rpl19(SL1344_2646)	rps16(SL1344_2649)	-	2826015	2826098	2826025	2826033	-	2827942	2827986	2828090	2828144	12	92.098	4.77e-20	3UTR	CDS	ACTGGTAAAGCGGCTCGTATCAAAGAGCGTCTTAACTGATAACGCATTCACGCTACATCCAAAGCGTGTTGTAA	GCTTTTAATATGACGCCGGGCTCCGTTCCTCGATGGGGCCCGGTTGTTTTATTCACACAAGAGGATGTTATGGTAACTATTCGTTTAGCTCGTCACGGCGCTAAAAAGCGTCCGTTCTACCAGGTTGTTGTCACCGACAGCCGTAATGCACGCAACGGTCGCTTCATTGAGCGCGTTGGTTTCTTCAACCCAATCGCTAGCGA
rpl19(SL1344_2646)	rpsP-leader(ncRNA0100)	-	2826017	2826099	2826023	2826024	-	2828089	2828098	2828136	2828145	29	607.717	1.03e-69	3UTR	sRNA	TACTGGTAAAGCGGCTCGTATCAAAGAGCGTCTTAACTGATAACGCATTCACGCTACATCCAAAGCGTGTTGTAAAA	GGCTTTTAATATGACGCCGGGCTCCGTTCCTCGATGGGGCCCGGTTGTTTTATTCAC
rpl20(SL1344_1270)	STnc440(ncRNA0162)	+	1371850	1371882	1371916	1371924	+	4580562	4580565	4580518	4580518	11	20.3409	1.84e-11	CDS	sRNA	GAATAGATACAGGAGAGCACATATGGCTCGCGTAAAACGTGGTGTAATTGCACGCGCACGTCACAAGAAAATTTT	AATTGTCCTCCTCATATTTGCGGCAGCGTAGTCTGCCGCTTTTTTTTA
rplI(SL1344_4327)	MgrR(ncRNA0043)	+	4652065	4652082	4652107	4652110	+	1550820	1550843	1550800	1550804	10	18.6431	4.02e-10	CDS	sRNA	CTTTGAGAGGATAAGGTAATGCAAGTTATTCTGCTTGATAAAGTAG	ATCCATGCAAGCATTTACCGCTGGTGAACCGGCGGTTTTTTTTT
rplI(SL1344_4327)	MgrR(ncRNA0043)	+	4652489	4652567	4652565	4652589	+	1550830	1550845	1550798	1550806	76	21.22	9.07e-71	3UTR	sRNA	GCGAAGTATTCGCAAAAGTTATCATCAACGTGGTTGCTGAGTAATCAGGCATTCTCGTTTTTGCTAGCAACGAAACGTCGGCCCAGCGCCGACGTTTTGCT	CTATCCATGCAAGCATTTACCGCTGGTGAACCGGCGGTTTTTTTTTGC
rplJ(SL1344_4090)	ArcZ(ncRNA0002)	+	4385911	4385962	4385982	4385990	+	3511913	3511919	3511859	3511863	61	13.6259	5.86e-46	5UTR	sRNA	TATTAAGACGCTCTTCTCGTTGAGATGAGTGAAGTGAGTTCCGGAACATGAGTTCCGGCAAACATCCAGGAGCAAAGCTA	GATTTCCCTGGTGTTGGCGCAGTATTCGCGCACCCCGGTCAAACCGGGGTCATTTTTTTTC
rplK(SL1344_4088)	ArcZ(ncRNA0002)	+	4384343	4384383	4384399	4384414	+	3511913	3511916	3511860	3511861	13	6.52228	2.31e-07	5UTR	sRNA	GCCTTTTGTTTTTATGGGCCTTATGCCCATAAAGCGATATTTATCACGGGGAGCTTCTTTGAAGCGATACTA	ATTTCCCTGGTGTTGGCGCAGTATTCGCGCACCCCGGTCAAACCGGGGTCATTTTTT
rplK(SL1344_4088)	ChiX(ncRNA0003)	+	4384343	4384386	4384431	4384437	+	555565	555573	555518	555528	53	15.5805	2.23e-42	5UTR	sRNA	GCCTTTTGTTTTTATGGGCCTTATGCCCATAAAGCGATATTTATCACGGGGAGCTTCTTTGAAGCGATACTACCCAATTCGAGGAATTTAGAATG	TAATAACGATGAAATTCCTCTTTGACGGGCCAATAGCGATATTGGCCATTTTTTTA
rplK(SL1344_4088)	ChiX(ncRNA0003)	+	4384388	4384449	4384436	4384480	+	555555	555575	555516	555530	114	13.4335	1.18e-82	CDS	sRNA	ACGGGGAGCTTCTTTGAAGCGATACTACCCAATTCGAGGAATTTAGAATGGCTAAGAAAGTACAAGCCTACGTCAAGCTGCAGGTTGCAGCTG	AATAATAACGATGAAATTCCTCTTTGACGGGCCAATAGCGATATTGGCCATTTTTTTATT
rplL(SL1344_4091)	ybjU(SL1344_0873)	+	4386882	4386887	4387002	4387012	-	966441	966446	966491	966505	11	64.1158	9.62e-17	3UTR	CDS	TCTCTGGAAGAAGCTGGCGCTGAAGTTGAAGTTAAATAAGCCAACCCTTCCGGTTGCAGCCTGAGAAATCAGGCTGATGGCTGGTGACTTTTTAGTCACCAGCCTTTTTGCGCTGTAAGGCGCCAGTAGCG	CCTACTGTTAACGCCCTTCAGCGCTACGCCGCCGACCTTTCCGGTAAAGAAGCGGCGCTTTTTTT
rplM(SL1344_3317)	STnc810(ncRNA0201)	-	3534638	3534662	--	--	-	4467935	4467938	4467969	4467976	10	2051.44	2.82e-30	CDS	sRNA	TTTAATGAAAACTTTTACAGCTAAACCAGAAACCGTAAAACGCGA	CACTTATGGTCGTATTTTGGCGCTCTTCGGAGCGCTTTTTTT
rplO(SL1344_3388)	STnc1920(ncRNA0276)	-	3609296	3609303	3609270	3609272	+	2756643	2756648	2756586	2756587	15	144.081	1.44e-27	CDS	sRNA	GGTTAAAGTTGAGGAGTAAGAGATGCGTTTAAAT	TTTATGCATTTCTGAAACTCCCCCGCAGGTAAGCTCCTTTTCCCTCCTGCGGGAATTTTTTAT
rplQ(SL1344_3381)	rpsI(SL1344_3316)	-	3604335	3604405	3604316	3604316	-	3533759	3533837	3533814	3533934	40	302.298	7.63e-53	3UTR	3UTR	ATCGAGCTGGTTGATCGTTCAGAGAAAACAGAAGCTGCTGCAGAGTAATCTGTAGTAACGTAAAAAAACCCGCTTCGGCGGGTTTTTTTA	TGCGTGGCGAACTGCGTAAAGCTGGCTTCGTTACTCGTGACGCTCGTCAGGTTGAACGTAAGAAAGTCGGCCTGCGTAAAGCACGTCGTCGTCCGCAGTTCTCCAAACGTTAATGGGGTTCTGCTTCGGCAGACAACTGTTAGCGAAAAAACCCGCTTCGGCGGGTTTTTTTATGG
rplQ(SL1344_3381)	rpsM(SL1344_3385).rpsK(SL1344_3384).IGR	-	3604619	3604686	3604504	3604600	-	3606738	3606778	3606794	3606861	19	115.346	1.11e-32	CDS	IGR	CTATGTTCCGCAACATGGCAGGTTCACTGGTTCGTCATGAAATCATCAAGACGACCCTGCCTAAAGCGAAAGAGCTGCGTCGCGTAGTTGAGCCGCTGATTACTCTTGCCAAGACTGATAGCGTTGCTAATCGTCGTCTGGCATTCGCCCGTACTCGTGATAACGAGATCGTGGCAAAACTGT	AATAATCGGGGTGATTGAATAATGGCAAAGGCACCAGTTCGCGCACGTAAACGTGTAAGAAAACAAGTCTCTGACGGCGTGGCTCATATCCATGCTTCTTTCAACAACACCATCGTGACTATTA
rplU(SL1344_3276)	RydC(ncRNA0064)	-	3494526	3494561	3494509	3494515	+	1686557	1686591	1686489	1686515	13	19.8342	5.06e-13	5UTR	sRNA	AATATTTATAGCGCGCTCTGAATCATTGAAAGGTGTGCGCGGAAGCGGAGTTT	TTATTTTATTTGTCATACAAATAAGTATAATACCCGCTTCCGATGTAGACCCGTCCTCCTTCGCCTGCGTCACGGGTCCTGGTTAGACGCAGGCGTTTTCTGT
rplY(SL1344_2201)	InvR(ncRNA0023)	+	2324091	2324186	2324173	2324241	+	3067553	3067587	3067502	3067544	50	3.01979	5.38e-11	CDS	sRNA	AGATCACTTACCTGTTGCTGGGTCGCCTGTAGCAGGAATTATTAAAGAGAGATTTAAATGTTTACTATCAACGCAGAAGTACGTAAAGAGCAGGGTAAGGGTGCGAGCCGCCGCCTGCGCGCCGCTAACAAGTTCCCGGCAATCATCTACG	ACTTTTACGGTTGGCCATTTGTCTCTTACGTTGCATTTATCAATCTGCTTTTTGATACAGCAGCACCTCGCTGCTGCTTTTTTTAT
rpmB(SL1344_3694)	STnc440(ncRNA0162)	-	3943724	3943805	3943680	3943761	+	4580533	4580565	4580491	4580504	14	40.1233	3.64e-18	CDS	sRNA	TCGAGCTAATTTGATTTTTGGAGAATAGACATGTCCCGAGTCTGCCAAGTTACTGGCAAGCGTCCGGTGACCGGTAACAACCGTTCCCACGCACTGAACGCGACTAAACGCCGTTTCCTGCCTAAC	GATTACTTTGTGGTGTAGCGTAACGGTAATTGTCCTCCTCATATTTGCGGCAGCGTAGTCTGCCGCTTTTTTTTA
rpmJ(SL1344_3386)	MgrR(ncRNA0043)	-	3607319	3607400	3607298	3607301	+	1550819	1550844	1550789	1550804	72	9.01456	1.02e-42	3UTR	sRNA	TTTGCAGTGCCGAGCCGAAGCATAAACAGCGCCAAGGCTGATTTTTTCGCATATTTTTCTTGCAAAGTTGGGTTGAGCTGGCTAGATTAGCCAGCCAATCTTT	AACACAAATCTATCCATGCAAGCATTTACCGCTGGTGAACCGGCGGTTTTTTTTTG
rpoS(SL1344_2903)	ArcZ(ncRNA0002)	-	3089126	3089202	3089066	3089149	+	3511913	3511919	3511859	3511865	133	19.5679	6.06e-117	5UTR	sRNA	GGGTAGCACCGGCACCAGCTCTACACGCTTGCATTTTGAAATTCGTTACAAGGGGAAATCCGTAAACCCGCTGCGTTATTTACCGCAGCGATAAAGCGGCGGAACCAGGCTTTGACTTGCTAGTTCCGTCAAGGGAT	GATTTCCCTGGTGTTGGCGCAGTATTCGCGCACCCCGGTCAAACCGGGGTCATTTTTTTTC
rpoS(SL1344_2903)	DsrA(ncRNA0011)	-	3089114	3089210	3089063	3089158	-	2026213	2026283	2026277	2026308	409	181.33	0	5UTR	sRNA	GCTACTATGGGTAGCACCGGCACCAGCTCTACACGCTTGCATTTTGAAATTCGTTACAAGGGGAAATCCGTAAACCCGCTGCGTTATTTACCGCAGCGATAAAGCGGCGGAACCAGGCTTTGACTTGCTAGTTCCGTCAAGGGATCAC	TAAATCTCACATCAGATTTCCTGGTGTAACGAATTTTCAAGTGCTTCTTGCATAAGCAAGTTTGATCCCGACCCGTAGGGCCGGGATTTTTTTCGG
rpoS(SL1344_2903)	MgrR(ncRNA0043)	-	3089130	3089408	3089063	3089265	+	1550820	1550846	1550760	1550808	1102	453.57	0	5UTR	sRNA	GGGATCGACATTGCAGGCAGTAAGGGACAGGCTATCGTCGCAACCGCTGATGGGCGCGTCGTATATGCCGGTAACGCACTGCGTGGTTACGGTAATCTTATTATCATCAAACATAACGATGATTACCTGAGTGCCTACGCCCATAATGATACGATGCTGGTCCGGGAACAACAGGAAGTTAAGGCGGGGCAAAAAATCGCTACTATGGGTAGCACCGGCACCAGCTCTACACGCTTGCATTTTGAAATTCGTTACAAGGGGAAATCCGTAAACCCGCTGCGTTATTTACCGCAGCGATAAAGCGGCGGAACCAGGCTTTGACTTGCTAGTTCCGTCAAGGGATCAC	CAAGAATTTGCCCGGTAGCGTATAAGCAAAACACAAATCTATCCATGCAAGCATTTACCGCTGGTGAACCGGCGGTTTTTTTTTGCC
rpoS(SL1344_2903)	rpoS(SL1344_2903)	-	3088032	3088087	3088009	3088046	-	3089093	3089140	3089165	3089165	12	4695.95	2.82e-40	3UTR	5UTR	GGGGCTGAATATCGAAGCGCTGTTCCGCGAGTAAGTACCCTTGTCAAAAAAAGGCCAGTCTGTCGACTGGCCTTTTTTT	GAAATTCGTTACAAGGGGAAATCCGTAAACCCGCTGCGTTATTTACCGCAGCGATAAAGCGGCGGAACCAGGC
RprA(ncRNA0058).AS	ArcZ(ncRNA0002)	+	1401729	1401735	--	--	+	3511914	3511917	3511861	3511861	11	842.544	3.64e-24	Antisense	sRNA	ATTCGTTGTTTCACTCAGGGGATTTCC	TTTCCCTGGTGTTGGCGCAGTATTCGCGCACCCCGGTCAAACCGGGGTCATTTTTTT
rps16(SL1344_2649)	ArcZ(ncRNA0002)	-	2827913	2827977	2827875	2827886	+	3511913	3511918	3511860	3511866	48	4.92925	2.32e-18	CDS	sRNA	TGAGCGCGTTGGTTTCTTCAACCCAATCGCTAGCGAAAAAGAAGAAGGCACCCGCCTGGATCTGGATCGCATCGCTCACTGGGTTGGCCAGGGCGCAACCATT	ATTTCCCTGGTGTTGGCGCAGTATTCGCGCACCCCGGTCAAACCGGGGTCATTTTTTTT
rps16(SL1344_2649)	rpl19(SL1344_2646)	-	2828019	2828105	2827979	2828065	-	2825991	2826086	2826122	2826222	14	84.765	1.2e-22	CDS	3UTR	CCGGTTGTTTTATTCACACAAGAGGATGTTATGGTAACTATTCGTTTAGCTCGTCACGGCGCTAAAAAGCGTCCGTTCTACCAGGTTGTTGTCACCGACAGCCGTAATGCACGCAACGGTCGCTTCA	TAAAATTTCCAACGGCGAAGGCGTTGAGCGTGTCTTCCAGACTCACTCTCCGGTAGTTGACAGCATTGCTGTTAAACGTCGTGGTGCTGTTCGTAAAGCTAAACTGTACTACCTGCGTGAGCGTACTGGTAAAGCGGCTCGTATCAAAGAGCGTCTTAACTGATAACGCATTCACGCTACATCCAAAGCGTGTTGTAAAACAAGGGGTTAGCGAATTGCTGACCCCTTTTTT
rps16(SL1344_2649)	rpl19(SL1344_2646)	-	2827915	2828083	2827873	2828050	-	2826092	2826192	2826154	2826227	52	466.278	3.81e-64	CDS	CDS	AGGATGTTATGGTAACTATTCGTTTAGCTCGTCACGGCGCTAAAAAGCGTCCGTTCTACCAGGTTGTTGTCACCGACAGCCGTAATGCACGCAACGGTCGCTTCATTGAGCGCGTTGGTTTCTTCAACCCAATCGCTAGCGAAAAAGAAGAAGGCACCCGCCTGGATCTGGATCGCATCGCTCACTGGGTTGGCCAGGGCGCAACCATTTC	GTTCGTAAAATTTCCAACGGCGAAGGCGTTGAGCGTGTCTTCCAGACTCACTCTCCGGTAGTTGACAGCATTGCTGTTAAACGTCGTGGTGCTGTTCGTAAAGCTAAACTGTACTACCTGCGTGAGCGTACTGGTA
rpsB(SL1344_0217)	DapZ(ncRNA0010)	+	255105	255174	255217	255219	+	74923	74925	74846	74846	13	13.6585	3.61e-11	3UTR	sRNA	GGGATGAGCGAGTGAAGGCAACGCGCCTGCGGCTCGAAATATGAAGGGGAGAGCCCTTATAGACCAGGTAGTATCACGTTTGGTTAGGGGGCCTGTATATGGCCCCCTTTTTCAC	AAATACCTTCGTGATGTGGTTGTGGTAATCAAGATTAATTGATTACAAAGGGCAATATATTATTGCCCTTTTGTTTTTGC
rpsD(SL1344_3383)	pez(SL1344_3382)	-	3606114	3606200	3606060	3606160	-	3604799	3604846	3604868	3604929	13	106.694	2.05e-22	CDS	CDS	GTAACTACTACAAAGAAGCAGCACGTCTGAAAGGCAACACCGGTGAAAACCTGTTGGCTCTGCTGGAAGGTCGTCTGGACAACGTTGTATACCGTATGGGCTTCGGCGCCACTCGTGCAGAAGCACGTCAGCTGGTTAGCC	GGTACAGCGTACCGAGGTTGAGCTTCTTAAGACGCCTAACTTGGGTAAAAAATCTCTTACCGAGATTAAAGACGTGCTGGCTTCCCGTGGACTGTCTCTGGGTATGCGCCTGGAAAACTGGCCACCGGCAA
rpsE(SL1344_3390)	prlA(SL1344_3387)	-	3609652	3609711	3609607	3609646	-	3607912	3607987	3607991	3608013	10	76.7765	3.62e-16	CDS	CDS	TGTTCACACGGGGTCTCGTGTATTCATGCAGCCAGCTTCCGAAGGTACCGGTATCATCGCCGGTGGTGCAATGCGCGCCGTTCTGGAAGTTGCTGGGGTTCATAA	CGGCAATCTTCGCTTCCAGTATTATTCTGTTCCCGGCGACCATCGCGTCATGGTTCGGGGGCGGTACTGGTTGGAACTGGCTGACAACAATTTCGCTGTATT
rpsF(SL1344_4324)	SL1344_3867(SL1344_3867)	+	4650999	4651072	4651102	4651109	+	4137923	4137930	4137886	4137893	13	1156.2	9.01e-35	CDS	3UTR	CGTCATTTTTCAGCCGACCTTTAACACGTTCCTTGCCTCCATGGGCCGCGGCTGACCCAGACAGGAGGCTGAATAATCCGTAAGGAGCAATTCGATGCGTCATTACGAAAT	TTCCAGAACGCATCAATTAGCGGCTCATGCAGCCGCTTTTTTTGC
rpsF(SL1344_4324)	STnc2110(ncRNA0286)	+	4650999	4651072	4651094	4651110	-	4030644	4030657	4030693	4030703	16	18.7426	1.81e-15	5UTR	sRNA	CGTCATTTTTCAGCCGACCTTTAACACGTTCCTTGCCTCCATGGGCCGCGGCTGACCCAGACAGGAGGCTGAATAATCCGTAAGGAGCAATTCGATGCGTCATTACGAAATC	CATTAAATAGCTAATGAGCTCCTTGCCTTGCCCCGCCAGAGATGGCGGGGCTTTTTTTAT
rpsF(SL1344_4324)	STnc930(ncRNA0210)	+	4650999	4651086	4651100	4651110	+	514513	514581	514483	514489	199	361.423	0	CDS	sRNA	CGTCATTTTTCAGCCGACCTTTAACACGTTCCTTGCCTCCATGGGCCGCGGCTGACCCAGACAGGAGGCTGAATAATCCGTAAGGAGCAATTCGATGCGTCATTACGAAATC	ACTTTTTGACGCATTGGCTGGACAATCCGCATCTACCTTATTCCCCCGAATGAGAGATCTCTTCCAGCAAGCCAGACATTCAGTCTGGCTTTTTTTTGG
rpsJ(SL1344_3408)	cspE(SL1344_0617)	-	3618017	3618094	3617972	3617977	+	692663	692665	--	--	11	38.7501	1.97e-14	CDS	3UTR	AGAACGGTTACACTCTCCCATCAATCGTAATGGGTGTGAGGAGTAATCATTTTCGTTTATAAAATAATTGGAGCTCTGGTCTCATGCAGAACCAAAGAATCCGTATCCGCCTGAAAGCGTTTG	GCCCTTTCGGCGGGTTTTTTTTG
rpsJ(SL1344_3408)	STnc2110(ncRNA0286)	-	3618031	3618167	3618008	3618015	-	4030645	4030670	4030683	4030703	60	68.2945	1.44e-49	5UTR	sRNA	ACGGCAGGTTCGATTTGAACCTCGAATAGCCGATTTGGCTATTTAACAATGCTCCCAATCGGGGAGCTACGTAAGAACGGTTACACTCTCCCATCAATCGTAATGGGTGTGAGGAGTAATCATTTTCGTTTATAAAATAATTGGAGCTCTGGTCTCATGC	CATTAAATAGCTAATGAGCTCCTTGCCTTGCCCCGCCAGAGATGGCGGGGCTTTTTTTA
rpsJ(SL1344_3408)	STnc440(ncRNA0162)	-	3617921	3618105	3617866	3618052	+	4580557	4580565	4580483	4580507	33	14.41	9.41e-14	CDS	sRNA	GGAGCTACGTAAGAACGGTTACACTCTCCCATCAATCGTAATGGGTGTGAGGAGTAATCATTTTCGTTTATAAAATAATTGGAGCTCTGGTCTCATGCAGAACCAAAGAATCCGTATCCGCCTGAAAGCGTTTGATCATCGTCTGATCGATCAATCAACCGCGGAAATCGTCGAGACTGCCAAGCGCACTGGTGCGCAGGTTCGCGGTCCGATCCCGCTGCCGACCCGCAAAGAGCGCTT	CAGTAACGGATTACTTTGTGGTGTAGCGTAACGGTAATTGTCCTCCTCATATTTGCGGCAGCGTAGTCTGCCGCTTTTTTTTA
rpsL(SL1344_3415)	ArcZ(ncRNA0002)	-	3624215	3624273	3624189	3624198	+	3511886	3511919	3511860	3511863	250	179.755	0	5UTR	sRNA	CCCTAAAATTCGGCGTCCTCATATTGTGTGAGGGCGTTTTATTACGTGTTTACGAAGCAAAAGCTAAAACCAGGAGCTATTTAAT	ATTTCCCTGGTGTTGGCGCAGTATTCGCGCACCCCGGTCAAACCGGGGTCATTTTTTTTC
rpsM(SL1344_3385)	InvR(ncRNA0023)	-	3607221	3607302	3607181	3607209	+	3067536	3067587	3067498	3067517	102	3.53452	2.18e-25	CDS	sRNA	TCTTTTGTATGTCTGTACGTTTCCATTTGAGTATCCTGAAAACGGGCTTTTCAGCATGGTACGTACATATTAAATAGTAGGAGTGCATAGTGGCCCGTATAGCAGGCATTAACATTCCTGAT	GGTCACTTTTACGGTTGGCCATTTGTCTCTTACGTTGCATTTATCAATCTGCTTTTTGATACAGCAGCACCTCGCTGCTGCTTTTTTTAT
rpsM(SL1344_3385)	STnc440(ncRNA0162)	-	3607068	3607103	3607026	3607045	+	4580557	4580565	4580492	4580492	12	12.75	4.37e-10	CDS	sRNA	GGGTATCGCTGAAAATGTTAAGATCAGTGAGCTGTCTGAAGAACAAATCGACACGCTGCGTGACGAAGTTGCCAAATT	ATTACTTTGTGGTGTAGCGTAACGGTAATTGTCCTCCTCATATTTGCGGCAGCGTAGTCTGCCGCTTTTTTTTA
rpsM(SL1344_3385).rpsK(SL1344_3384).IGR	STnc870(ncRNA0205)	-	3606848	3606868	3606822	3606835	+	4292566	4292602	4292541	4292544	13	22.3173	9.13e-14	IGR	sRNA	ATCAAGAAATAATCGGGGTGATTGAATAATGGCAAAGGCACCAGTTC	TTTTCCTTGCCATAGACACCATCCCTGTCTTCCCCCACATGATGTGGGGGTTTTTTTTATCT
rpsO(SL1344_3256)	ArcZ(ncRNA0002)	-	3472675	3472702	3472645	3472657	+	3511913	3511919	3511859	3511861	76	8.08798	1.26e-41	5UTR	sRNA	CCGCTTAACGTCGCGTAAATTATTTAACAGTTTACGCGGCGTACACTGGGATCGCTGA	GATTTCCCTGGTGTTGGCGCAGTATTCGCGCACCCCGGTCAAACCGGGGTCATTTTTTTTC
rpsO(SL1344_3256)	STnc1920(ncRNA0276)	-	3472324	3472389	3472282	3472283	+	2756642	2756647	2756586	2756593	13	82.9812	5.15e-21	3UTR	sRNA	TGAAACGTAAAGATGTTGCACGCTACACCGCGCTGATTGAGCGTCTGGGTCTGCGTCGCTAATTCTTTCGAGTTTCAGAAAGAGGGGGCCTTCATGGCCCCTTTTTTC	TTTATGCATTTCTGAAACTCCCCCGCAGGTAAGCTCCTTTTCCCTCCTGCGGGAATTTTTTA
rpsP-leader(ncRNA0100)	STnc870(ncRNA0205)	-	2828141	2828145	--	--	+	4292591	4292599	4292538	4292546	14	19.0594	8.39e-14	sRNA	sRNA	GGCTTTTAATATGACGCCGGGCTCC	CTGTTTTCCTTGCCATAGACACCATCCCTGTCTTCCCCCACATGATGTGGGGGTTTTTTTTA
rpsR(SL1344_4326)	DapZ(ncRNA0010)	+	4651810	4651886	4651916	4651927	+	74922	74924	74845	74854	26	106.744	3.33e-43	CDS	sRNA	CCATATGGCACGTTATTTCCGTCGTCGCAAGTTCTGCCGTTTCACCGCGGAAGGCGTTCAAGAGATCGACTATAAAGATATCGCTACGCTGAAAAACTACATCACCGAAAGCGGTAAG	TAAATACCTTCGTGATGTGGTTGTGGTAATCAAGATTAATTGATTACAAAGGGCAATATATTATTGCCCTTTTGTTTTTG
rpsT(SL1344_0044)	CyaR(ncRNA0009)	-	52516	52583	52484	52538	+	2228929	2228932	2228854	2228878	65	37.2055	1.32e-74	CDS	sRNA	CCTTTGAATTGTCCATATAGAACACATTTGGGAGTTGGACCTTGGCTAATATCAAATCAGCTAAGAAGCGCGCCGTTCAGTCTGAAAAGGCTCGTAAGCA	ACATAACCCATAAATGCTAGCTGTACCAGGAACCACCTCCTTGGCCTGCGTAATCTCCCTTACGCAGGCTTATTTTTTG
rpsU(SL1344_3183)	InvR(ncRNA0023)	+	3394694	3394765	3394764	3395051	+	3067546	3067588	3067487	3067520	106	7.23544	3.18e-51	CDS	sRNA	ACCATTTTGAAATAAGCTGGCGTTGATGCCAGCGGCAAACCGAATTAATCAAAGGTGAGAGGCACATGCCGGTAATTAAAGTACGTGAAAACGAGCCGTTCGACGTAGCTCTGCGTCGCTTCAAGCGTTCCTGCGAAAAAGCAGGTGTTCTGGCGGAAGTTCGTCGTCGTGAGTTCTATGAAAAACCGACGACCGAACGTAAGCGCGCTAAAGCTTCTGCAGTGAAACGTCACGCGAAGAAACTGGCTCGCGAAAACGCACGCCGTACTCGTCTGTACTAATCTTTTGAGAGCGGGCTGCTCTCAATTCAGATCGAGTTGTAGTTGTAAGGCCGTGCTTCCGAAAGGAATGCGCGGCT	ATTATAGCTATGGTCACTTTTACGGTTGGCCATTTGTCTCTTACGTTGCATTTATCAATCTGCTTTTTGATACAGCAGCACCTCGCTGCTGCTTTTTTTATT
rstA(SL1344_1405)	MgrR(ncRNA0043)	-	1508237	1508280	1508209	1508209	+	1550836	1550844	1550763	1550766	12	50.6727	9.71e-17	CDS	sRNA	TGGATCGCAGCGTGGATGTAGCGATTTCCCGCCTGCGTAAGAAACTGCTGGATAGCGCTGCTGAGCCCTATC	GAATTTGCCCGGTAGCGTATAAGCAAAACACAAATCTATCCATGCAAGCATTTACCGCTGGTGAACCGGCGGTTTTTTTTTG
RUF_111(ncRNA0502)	MgrR(ncRNA0043)	-	2285717	2285753	2285643	2285683	+	1550788	1550844	1550759	1550769	33	188.19	1.24e-38	sRNA	sRNA	ACGTTTGTCGCACTGTAACTAACGTGTAACAGTTAGTTGTCAGTTTTGCTGGGGTATTTCGCTTATAAAAACCGTTATCACAATATCCCGCGACTACCGGACAAAAATAAA	GCAAGAATTTGCCCGGTAGCGTATAAGCAAAACACAAATCTATCCATGCAAGCATTTACCGCTGGTGAACCGGCGGTTTTTTTTTG
RUF_167(ncRNA0508)	STnc2040(ncRNA0281)	-	1014938	1015060	1014948	1014990	-	1819350	1819361	1819392	1819421	252	16577.5	0	sRNA	sRNA	GGAGTCAGGAAAAAATTCAACTCTATTTATAATTTTTAAAATTTATTTTTATTAGGATAATCAAAAAGTTACACCGTAATTGCATAAAAGCCATGCGACTTACGGGCCTATAA	GACGTCATTCTAAAAATAAAAAGTAACTTTTGATTATCCTTTGCGCGGCGTTAGACCGCGCTTTTTTTTATC
sbcC(SL1344_0390).araJ(SL1344_0389).IGR	CyaR(ncRNA0009)	-	445616	445617	445542	445546	+	2228927	2228933	2228863	2228885	41	59.8198	3.31e-55	IGR	sRNA	TTGATTGGCTGTGACAATTCACAGCCACAGCGCGCAACATGCGCCTTTATTTTCGGCAGGTGGTATGAAAAAAGTT	ATAAATGCTAGCTGTACCAGGAACCACCTCCTTGGCCTGCGTAATCTCCCTTACGCAGGCTTATTTTTTGC
sbcC(SL1344_0390).AS	ArcZ(ncRNA0002)	+	445786	445787	--	--	+	3511913	3511918	3511861	3511861	11	842.544	3.64e-24	Antisense	sRNA	TTTTATCTGCACAGGGATACGT	TTTCCCTGGTGTTGGCGCAGTATTCGCGCACCCCGGTCAAACCGGGGTCATTTTTTTT
sbmA(SL1344_0371)	ArcZ(ncRNA0002)	+	429814	429859	429877	429883	+	3511913	3511919	3511860	3511880	136	2085.1	6.45e-302	5UTR	sRNA	ATAAAGATAAGAAGTTAGCAGGAGAGCATGATGTTTAAATCTTTTTTCCCAAAGCCAGGGCCGTTTTTCA	ATTTCCCTGGTGTTGGCGCAGTATTCGCGCACCCCGGTCAAACCGGGGTCATTTTTTTTC
sdaC(SL1344_2950)	ArcZ(ncRNA0002)	+	3142109	3142264	3142212	3142241	+	3511882	3511920	3511859	3511869	4683	3970.27	0	5UTR	sRNA	CGAAAATTATTACGGCGAAAAATTATATAAAAAGCGTCCCTAAGCAGATTTCATTTTACGATCAGGTCTTTTTTCATTGGATTAGACCAGCAACCTGATTTTTAGCATCCTCCAGGAGAAATAGATGGAAACC	GATTTCCCTGGTGTTGGCGCAGTATTCGCGCACCCCGGTCAAACCGGGGTCATTTTTTTTCC
sdaC(SL1344_2950)	DapZ(ncRNA0010)	+	3142945	3142984	3143001	3143017	+	74920	74924	74848	74848	13	48.5822	4.97e-18	CDS	sRNA	AGTACGGTGAAGGCGCTGAGAAGAAATGTTCTAAAATTCTGGCCTTCGCCCACATCATGATGGTGCTGACCGT	ATACCTTCGTGATGTGGTTGTGGTAATCAAGATTAATTGATTACAAAGGGCAATATATTATTGCCCTTTTGTTTTTG
sdaC(SL1344_2950)	RprA(ncRNA0058)	+	3142127	3142186	3142207	3142209	-	1401682	1401708	1401730	1401733	43	214.432	1.11e-56	5UTR	sRNA	AAAATTATATAAAAAGCGTCCCTAAGCAGATTTCATTTTACGATCAGGTCTTTTTTCATTGGATTAGACCAGCAACCTGATTT	CGAATTGCTGTGTGTAGTCTTTGCCCGTCTCCTACGATGGGCTTTTTTTTTA
sdaC(SL1344_2950)	Spf(ncRNA0075)	+	3142925	3142980	3142958	3143003	+	4230569	4230612	4230539	4230545	53	3.41283	1.66e-13	CDS	sRNA	CGCGGTTGCGAAGCGTGAAGAGTACGGTGAAGGCGCTGAGAAGAAATGTTCTAAAATTCTGGCCTTCGCCCACATCATG	CTTTTACTTCACGTAATCGGATTTGGCTGAATATTTTAGCCGCCCCAGTCAGTTTATGACTGGGGCGTTTTTTA
secB(SL1344_3667)	ArcZ(ncRNA0002)	-	3917841	3917970	3917809	3917822	+	3511913	3511919	3511859	3511863	161	173.654	4.95e-183	5UTR	sRNA	AGTGGCCGAACGACGGTTCCGCAAATTTTTATTGATGCACAGCACATTGGCGGTTGTGACGACTTGTATGCGCTGGATGCGCGTGGTGGACTGGATCCGCTGTTGCGTTAAGGCGTACTCAAGTATTTAAGGACAACACTAAAGGGTTTTACACATGTCAGA	GATTTCCCTGGTGTTGGCGCAGTATTCGCGCACCCCGGTCAAACCGGGGTCATTTTTTTTC
secD(SL1344_0402)	ArcZ(ncRNA0002)	+	462090	462242	462260	462266	+	3511887	3511919	3511860	3511865	275	533.499	0	CDS	sRNA	TGAGCGTGCTGGGGGATAAATATGTCGTGGCGCTTAACCTTGCGCCGGCTACGCCGCGCTGGTTGGCGGCTATTCACGCCGATCCGATGAAGCTCGGTCTTGATCTGCGCGGCGGCGTTCACTTCCTGATGGAAGTGGATATGGATACCGCGTTAGGTAAACTCCAGGAACAAAATA	ATTTCCCTGGTGTTGGCGCAGTATTCGCGCACCCCGGTCAAACCGGGGTCATTTTTTTTC
secD(SL1344_0402)	STnc870(ncRNA0205)	+	461818	461874	461916	461916	+	4292596	4292599	4292540	4292543	14	29.9875	1.99e-16	CDS	sRNA	GTTAAACCGTTATCCTTTGTGGAAGTACATCATGCTGGTCGTCGTGATTATCGTCGGCCTGCTTTACGCACTTCCCAACCTGTATGGTGAGGATCCGGC	GTTTTCCTTGCCATAGACACCATCCCTGTCTTCCCCCACATGATGTGGGGGTTTTTTTTA
serA(SL1344_3038).AS	ArcZ(ncRNA0002)	+	3243936	3243972	3243989	3243993	+	3511916	3511917	3511858	3511862	11	229.785	6.83e-21	Antisense	sRNA	ATGTTGAGGCAGGGAAACCAGAGAAAGGATGGGCAGGTCATCTCCTGCCCATTTAGCG	CGATTTCCCTGGTGTTGGCGCAGTATTCGCGCACCCCGGTCAAACCGGGGTCATTTTTTT
sfbA(SL1344_0503)	GcvB(ncRNA0014)	+	570516	570559	570575	570589	+	3156913	3156984	3156835	3156849	12	25.3816	5.71e-13	5UTR	sRNA	ATAGCCTTTCGTTTGGGCCAAAACAGACGATGCCGCATGAACGGCATCCGGCACAGCATCACACTATTTAAAAT	CTTACGGTTGTGATGTTGTGTTGTTGTGTTTGCAATTGGTCTGCGATTCAGACCACGGTAGCGAGACTACCCTTTTTCACTTCCTGTACATTTACCCTGTCTGTCCATAGTGATTAATGTAGCACCGCCATATTGCGGTGCTTTTTTTTG
sicP(SL1344_2859)	ArcZ(ncRNA0002)	-	3046655	3046705	3046630	3046636	+	3511883	3511921	3511860	3511879	3352	5330.76	0	CDS	sRNA	AATTTGAAGAAGCAATCTTATAAAAGATATAATTCAAGAGGAAAGTAAATTGCAAGCACACCAGGATATTATCGCT	ATTTCCCTGGTGTTGGCGCAGTATTCGCGCACCCCGGTCAAACCGGGGTCATTTTTTTTCCG
sigD(SL1344_1030)	ArcZ(ncRNA0002)	-	1136143	1136206	1136093	1136169	+	3511915	3511918	3511862	3511862	11	35.6004	1.07e-13	CDS	sRNA	CACTAAAAACCCAGGAGGCTTTTAAAAGCCTACAAAAAACCTTATACAACGGAATGCAGATTCTCTCAGGCCAGGGCAAAGCGCCGGCTAAAGCGCCCGACGCTCGCCCGGAAA	TTCCCTGGTGTTGGCGCAGTATTCGCGCACCCCGGTCAAACCGGGGTCATTTTTTTT
siiA(SL1344_4193)	InvR(ncRNA0023)	+	4499106	4499156	4499152	4499342	+	3067540	3067586	3067482	3067512	25	15.8353	2.98e-20	CDS	sRNA	CCACAAAAACATTTTATTCACAATGTAATATCAGGAGACAACATGGAAGACGAAAGTAATCCGTGGCCTAGTTTTGTTGATACATTCTCTACGGTATTGTGCATTTTTATATTTCTTATGTTGGTGTTTGCACTTAATAATATGATTATTATGTATGACAACTCAATTAAAGTTTATAAAGCAAATATAGAGAATAAGACTAAATCTACTGCTCAAAATAGCGGAGCCAATGACGAT	TAATTATTATAGCTATGGTCACTTTTACGGTTGGCCATTTGTCTCTTACGTTGCATTTATCAATCTGCTTTTTGATACAGCAGCACCTCGCTGCTGCTTTTTTTA
siiA(SL1344_4193)	Spf(ncRNA0075)	+	4498893	4499075	4498994	4499103	+	4230539	4230614	4230503	4230551	118	22.0952	2.63e-58	5UTR	sRNA	ATAATTGATGTCTACCTAATTAAAAAAATGAAGAGTGTTTTTAATTAAAGCACTCATCTTTGTTGTGGGCGCATAAAAATGGCGTCGTTGTTTTTATTTTTCTGATTACGAGATGTAAGAAAACTGAAATCTATAAAGCGTATTGGTAGCAGGAAGCCAAGGGCGGTAGCGTTCACTTTCTGAATAAGTTGAGCATCCTTTATCCTTTCTA	GTAGGGTACAGAGGTAAGATGTTCTATCTTTCAGACCTTTTACTTCACGTAATCGGATTTGGCTGAATATTTTAGCCGCCCCAGTCAGTTTATGACTGGGGCGTTTTTTATT
siiA(SL1344_4193)	STnc440(ncRNA0162)	+	4499505	4499518	4499537	4499542	+	4580541	4580566	4580472	4580520	58	10971.2	9.69e-187	CDS	sRNA	AGGCTGAGAAGCTTTTCAGAAGAGGACACTTATAAAAT	TTTACTTACCTCAGTAACGGATTACTTTGTGGTGTAGCGTAACGGTAATTGTCCTCCTCATATTTGCGGCAGCGTAGTCTGCCGCTTTTTTTTAT
siiA(SL1344_4193)	STnc440(ncRNA0162)	+	4498804	4498884	4498860	4498922	+	4580540	4580566	4580511	4580521	36	1576.06	9.03e-98	5UTR	sRNA	GGGTGGTTTTAATTTGCTGATGACTATTTTTTATTTATGAGTTGAGAGCTTATGCGATACCTATTATTGGGGAGGATATAGTTAGTGCAATAATTGATGTCTACCTAATTAAAAAAATG	TAACGGTAATTGTCCTCCTCATATTTGCGGCAGCGTAGTCTGCCGCTTTTTTTTAT
siiB(SL1344_4194)	ArcZ(ncRNA0002)	+	4500022	4500045	4500065	4500068	+	3511913	3511918	3511860	3511862	49	402.224	1.1e-95	CDS	sRNA	CATTCTTTCTAACCTCAATCAGGTTTTGTTTGCCGGGGAGTCCAAAC	ATTTCCCTGGTGTTGGCGCAGTATTCGCGCACCCCGGTCAAACCGGGGTCATTTTTTTT
siiC(SL1344_4195)	STnc440(ncRNA0162)	+	4501447	4501448	4501478	4501478	+	4580562	4580565	4580510	4580517	11	6631.44	2.34e-35	CDS	sRNA	ATTTTGGAGTGAGGGGGGCTAATATCAGGAAA	GTAACGGTAATTGTCCTCCTCATATTTGCGGCAGCGTAGTCTGCCGCTTTTTTTTA
siiD(SL1344_4196)	MgrR(ncRNA0043)	+	4502900	4502968	4502983	4502989	+	1550836	1550844	1550796	1550804	17	839.962	1.29e-39	CDS	sRNA	TTAAAAAAAACCTCTCTTGATTCTGAGATTAGCGGATTACAAGAGAAGCTGAGTTCGAAAGAAAAAGAACTCGCATTGCTTGCCGAAGAA	ATCTATCCATGCAAGCATTTACCGCTGGTGAACCGGCGGTTTTTTTTTG
siiE(SL1344_4197).siiF(SL1344_4198).IGR	DapZ(ncRNA0010)	+	4520428	4520444	4520477	4520482	+	74922	74924	74846	74846	10	736.943	1.59e-25	IGR	sRNA	AAGAAGAACACGCATAATAACGGAGGCCCCTCACCTTTGGGTGAGGGGGTTTACT	AAATACCTTCGTGATGTGGTTGTGGTAATCAAGATTAATTGATTACAAAGGGCAATATATTATTGCCCTTTTGTTTTTG
sipA(SL1344_2861)	InvR(ncRNA0023)	-	3048223	3048277	3048166	3048230	+	3067551	3067586	3067503	3067527	42	35.1858	2.93e-44	CDS	sRNA	CAGCCAACGCAATGGCGAGTCACACCATTCGACTAACAGCAGCAACGTAAGTCATAGTCATTCGCGTGTGGATTCGACTACGCATCAAACGGAGACGGCACACAGCGCCAGC	CTTTTACGGTTGGCCATTTGTCTCTTACGTTGCATTTATCAATCTGCTTTTTGATACAGCAGCACCTCGCTGCTGCTTTTTTTA
sipD(SL1344_2862)	DapZ(ncRNA0010)	-	3049462	3049465	3049434	3049434	+	74922	74924	74846	74854	11	4134.7	1.67e-34	CDS	sRNA	AAATATGAAAACCACATTACAGACGCTGACGC	AAATACCTTCGTGATGTGGTTGTGGTAATCAAGATTAATTGATTACAAAGGGCAATATATTATTGCCCTTTTGTTTTTG
sipF(SL1344_2860)	ArcZ(ncRNA0002)	-	3047003	3047051	3046982	--	+	3511913	3511918	3511860	3511863	147	665.041	2.71e-166	CDS	sRNA	CTGATATGATGACCTTTGCGGATATATGCCGTGTTGTTAAAAAAAGTCTTGAGTCCAGGGTGTAGTATTT	ATTTCCCTGGTGTTGGCGCAGTATTCGCGCACCCCGGTCAAACCGGGGTCATTTTTTTT
SL1344_0018(SL1344_0018).SL1344_0019(SL1344_0019).IGR	ArcZ(ncRNA0002)	+	19993	20002	20042	20049	+	3511914	3511918	3511861	3511866	47	1800.41	1.89e-104	IGR	sRNA	CTTCATGATTCAAGCCCTGGTTTACCGGGGCTTTTCTCCACCAGGGACAGAGGAAGA	TTTCCCTGGTGTTGGCGCAGTATTCGCGCACCCCGGTCAAACCGGGGTCATTTTTTTT
SL1344_0032(SL1344_0032).SL1344_0033(SL1344_0033).IGR	ArcZ(ncRNA0002)	+	35121	35149	35174	35174	+	3511915	3511918	3511860	3511862	28	6.4347e+06	6.76e-67	IGR	sRNA	CATTAATGCTACATAATTGTTATGCTTTTATAGTAGCGCCAGGGAAATAAAATC	ATTTCCCTGGTGTTGGCGCAGTATTCGCGCACCCCGGTCAAACCGGGGTCATTTTTTTT
SL1344_0033(SL1344_0033)	InvR(ncRNA0023)	+	36971	36973	37002	37006	+	3067554	3067587	3067499	3067512	44	1142.71	1.42e-73	CDS	sRNA	ATTTCAAGAACGAAGAGACGAATGGCACGAATTATC	GTCACTTTTACGGTTGGCCATTTGTCTCTTACGTTGCATTTATCAATCTGCTTTTTGATACAGCAGCACCTCGCTGCTGCTTTTTTTAT
SL1344_0035(SL1344_0035).AS	ArcZ(ncRNA0002)	+	38698	38725	38746	38748	+	3511914	3511918	3511860	3511865	17	3906.5	1.2e-39	Antisense	sRNA	ACAATGCCTGTAGTCGTGTCATTCACGACTACAAACCGGGGAAATTAAGTA	ATTTCCCTGGTGTTGGCGCAGTATTCGCGCACCCCGGTCAAACCGGGGTCATTTTTTTT
SL1344_0042(SL1344_0042).AS	ArcZ(ncRNA0002)	+	50289	50313	50344	50349	+	3511913	3511917	3511860	3511863	11	2.52763e+06	1.01e-26	Antisense	sRNA	ATTACCGGCAGATGACGGCCGCTGCGTACGCGCAGGCTGTTCTCGCCCCAGGGTTCAATCC	ATTTCCCTGGTGTTGGCGCAGTATTCGCGCACCCCGGTCAAACCGGGGTCATTTTTTT
SL1344_0080(SL1344_0080).AS	MgrR(ncRNA0043)	-	93550	93594	93531	93531	+	1550816	1550842	1550794	1550800	12	51.1095	8.83e-17	Antisense	sRNA	TTTTCAGTTGTTTTAGCATGTGACTGTTAACTGTAGCGTTATTGGCGAAAAGCAGGGAGAAATG	AAATCTATCCATGCAAGCATTTACCGCTGGTGAACCGGCGGTTTTTTTT
SL1344_0081(SL1344_0081).AS	MgrR(ncRNA0043)	-	93618	93705	93580	93586	+	1550813	1550845	1550794	1550800	32	136.331	1.34e-54	Antisense	sRNA	TGCCATCCGTGGTTTCAACCGCCTGGTTAGAAGAGCATCCTGCGACGGTGAATAGTGTTGCTGCGGTAAACAGTGCGGTCATAAGACGTTTTTGCATGGTGTTCTCCCTGCTTTTCAGTTGTTTTA	AAATCTATCCATGCAAGCATTTACCGCTGGTGAACCGGCGGTTTTTTTTTGC
SL1344_0138(SL1344_0138)	MgrR(ncRNA0043)	-	162535	162569	162412	162513	+	1550824	1550844	1550787	1550798	13	123.517	1.39e-22	CDS	sRNA	AATTTCCGGCCATAAGAGCCGTTTTGCCATTCGCTTTATGCCGCTGGATAGTGAAAATGGTCTGGTGCCGGAGCGTCTTGATTTTGAACTGGCCTGTTGCTAAGGAGTAAAAATGTCTGACGTGACCGTCGTAAACTGTCCGACCTGCGGTAAACCGG	AAAACACAAATCTATCCATGCAAGCATTTACCGCTGGTGAACCGGCGGTTTTTTTTTG
SL1344_0148(SL1344_0148)	ArcZ(ncRNA0002)	-	171382	171411	171352	171405	+	3511913	3511920	3511859	3511865	173	145.769	3.58e-282	CDS	sRNA	ACCACTTTTTATCATCAGGGAAAGCAGTGGTATCTGTGGGCGCAAAAAGCGCCGGATATT	GATTTCCCTGGTGTTGGCGCAGTATTCGCGCACCCCGGTCAAACCGGGGTCATTTTTTTTCC
SL1344_0152(SL1344_0152)	RybD(ncRNA0062)	+	176194	176235	176254	176265	+	807420	807433	807355	807396	109	439.349	1.23e-232	CDS	sRNA	GGACAGGTTCCAGATAACTCAACGTATTAGATAGATAAGGAATACCCCCATGTCAGAACGTTTCCAAAATGA	AAAACTCGCTGTTCCTGCGGGAACAGATAAATGTCCGTTTTCGACATGGTTGGCCACCTTTACGGTGGCCTTTTTTATG
SL1344_0239(SL1344_0239)	ArcZ(ncRNA0002)	-	280350	280377	280316	280320	+	3511916	3511916	3511861	3511861	10	95.743	2.78e-16	CDS	sRNA	GCGGCAGATAGCGCCCTTTCAGAGTCGGTCAGGGAAAAGGCAGCTTATGCTGCCGCGAACTT	TTTCCCTGGTGTTGGCGCAGTATTCGCGCACCCCGGTCAAACCGGGGTCATTTTTT
SL1344_0307(SL1344_0307)	CyaR(ncRNA0009)	+	355691	355767	355746	355816	+	2228929	2228931	2228865	2228866	12	34.5827	1.09e-14	CDS	sRNA	CGTTTAAAGATCCGCAACCGAGCTACCATTCGCCGATTGCGAAACTGGTACAGAATTACCCGATCAAGTCCTGCTCGGTTATCGCCCATATCCGTCAGGCTAATCGCGGTGAAGTGGCGCTGGAAA	AAATGCTAGCTGTACCAGGAACCACCTCCTTGGCCTGCGTAATCTCCCTTACGCAGGCTTATTTTTT
SL1344_0339(SL1344_0339)	ArcZ(ncRNA0002)	+	388761	388776	388796	388801	+	3511914	3511917	3511861	3511861	18	590.902	1.35e-37	CDS	sRNA	GGGTGAAAATATTGATTACTTTACCCTCCAGGGTTCGTATG	TTTCCCTGGTGTTGGCGCAGTATTCGCGCACCCCGGTCAAACCGGGGTCATTTTTTT
SL1344_0360(SL1344_0360)	STnc870(ncRNA0205)	-	414946	414961	414918	414921	+	4292566	4292600	4292541	4292542	11	1166.95	4.61e-29	5UTR	sRNA	GTTATTTCTTGAGGCTATGGGAAGAGTTGTCTATGGAGCCGTTT	TTTTCCTTGCCATAGACACCATCCCTGTCTTCCCCCACATGATGTGGGGGTTTTTTTTAT
SL1344_0431(SL1344_0431)	ArcZ(ncRNA0002)	+	490200	490263	490281	490283	+	3511914	3511918	3511860	3511862	22	2527.82	2.8e-50	CDS	sRNA	AGTATACTAATTCATGCTCTAAATAATAGACCCGAGAGCGATGCGCTTTTTTTTAGCCGTATTGGATTTAACCAGGAAAAAACA	ATTTCCCTGGTGTTGGCGCAGTATTCGCGCACCCCGGTCAAACCGGGGTCATTTTTTTT
SL1344_0449(SL1344_0449)	ArcZ(ncRNA0002)	-	511571	511583	511552	511552	+	3511915	3511917	3511860	3511861	11	180.545	4.26e-20	CDS	sRNA	GTATCCCCAATACTTTCGTACCGGGACGCAAT	ATTTCCCTGGTGTTGGCGCAGTATTCGCGCACCCCGGTCAAACCGGGGTCATTTTTTT
SL1344_0467(SL1344_0467)	ArcZ(ncRNA0002)	-	527905	527912	527877	527882	+	3511913	3511919	3511860	3511865	284	933.947	0	5UTR	sRNA	TTGTTTCGTCAACGCCACCAGGGCCAATCCTGTTAG	ATTTCCCTGGTGTTGGCGCAGTATTCGCGCACCCCGGTCAAACCGGGGTCATTTTTTTTC
SL1344_0471(SL1344_0471)	RprA(ncRNA0058)	+	533968	533981	--	--	-	1401683	1401687	1401730	1401732	22	2235.57	9.1e-64	5UTR	sRNA	CTCAATTATTTCCGGTCTGCTTGCCGGTTCAGAC	GAATTGCTGTGTGTAGTCTTTGCCCGTCTCCTACGATGGGCTTTTTTTTT
SL1344_0471(SL1344_0471)	RprA(ncRNA0058)	+	533994	534030	534033	534059	-	1401683	1401708	1401729	1401733	37	4109.32	4.61e-62	CDS	sRNA	GTTCAGACACTTCATTCTCATGACTATGTTGCAGCTTTATAAACGTTCACAGCATTTTGTTTTTAT	CGAATTGCTGTGTGTAGTCTTTGCCCGTCTCCTACGATGGGCTTTTTTTTT
SL1344_0489(SL1344_0489).AS	ArcZ(ncRNA0002)	+	555588	555784	555675	555814	+	3511885	3511919	3511859	3511863	167	334.929	5.97e-225	Antisense	sRNA	GTAGGTTGCCTTCGCCGTACAGATGTAGCGCCCCTACGGCTACCACGTAGCGTCCCGGCGGCAGTGCCAGCAGCGCGTCGCGCCAGGCTTCATTGCGTTTCACCATCAGTACATCATACAGCGGCTGGCTAAACGTTCTGGGGAGCGAAGCGCCGACGCTGGTCGGCGGCTGCTCAAGCCACCAGCCGATCATCACCTGCAAAAGCCGTGCGTTGGTGTGCCAGTGC	GATTTCCCTGGTGTTGGCGCAGTATTCGCGCACCCCGGTCAAACCGGGGTCATTTTTTTTC
SL1344_0555(SL1344_0555)	ArcZ(ncRNA0002)	-	623388	623408	623362	623370	+	3511915	3511918	3511860	3511861	18	71.3157	2.86e-26	5UTR	sRNA	GACCTGGTATCTGTTATCCGTTTTTGAGCCACGCCAGGCATCAACGT	ATTTCCCTGGTGTTGGCGCAGTATTCGCGCACCCCGGTCAAACCGGGGTCATTTTTTTT
SL1344_0630(SL1344_0630)	ArcZ(ncRNA0002)	-	704173	704408	704151	704166	+	3511883	3511921	3511860	3511870	3009	3272.22	0	5UTR	sRNA	GCCAGGCTTTTTTCACCTTGCAGAGCTTTGCAGAAATTGTTTTACAAAAATGGCGATGCTTTCTGTGACGTGGGATGGGATGATAATCTGGTTTTAAACGCCGATCCGGCGACATAAGTCCCGGTATCGCCGCTGATTCAGGTATACTACACGGCGTCCCGCCGGAAGGTTAGCGTTAACTCGCAACGCCTTACCGGTCCAGCCTGTTGGCCTTTTTTCTATCGTTATAACGCAATTATTCACCCAGGGGGAAAACTT	ATTTCCCTGGTGTTGGCGCAGTATTCGCGCACCCCGGTCAAACCGGGGTCATTTTTTTTCCG
SL1344_0630(SL1344_0630)	STnc870(ncRNA0205)	-	704159	704212	--	--	+	4292587	4292599	4292541	4292561	10	11.9099	2.33e-08	5UTR	sRNA	GTCCAGCCTGTTGGCCTTTTTTCTATCGTTATAACGCAATTATTCACCCAGGGGGAAAACTTGCAGGGTAAAGC	TTTTCCTTGCCATAGACACCATCCCTGTCTTCCCCCACATGATGTGGGGGTTTTTTTTA
SL1344_0640(SL1344_0640)	ArcZ(ncRNA0002)	+	714309	714337	714358	714359	+	3511915	3511918	3511860	3511862	18	147.726	7.29e-31	CDS	sRNA	CGGAACAGTTAAATATTAACTATAAAATTTTTACCTTACAGGGAAATGATA	ATTTCCCTGGTGTTGGCGCAGTATTCGCGCACCCCGGTCAAACCGGGGTCATTTTTTTT
SL1344_0661(SL1344_0661).AS	ArcZ(ncRNA0002)	+	736847	736852	--	--	+	3511914	3511918	3511859	3511862	15	3446.86	5.68e-35	Antisense	sRNA	ATTTTACAAGAATCGCCAGGGTGATT	GATTTCCCTGGTGTTGGCGCAGTATTCGCGCACCCCGGTCAAACCGGGGTCATTTTTTTT
SL1344_0762(SL1344_0762)	MgrR(ncRNA0043)	+	849488	849525	849554	849554	+	1550821	1550844	1550794	1550804	13	173.591	3.09e-24	3UTR	sRNA	TTTCAATAAACATTGCTTGCAGTAAAACCACGGGCCGCCACATCTGCTGCGGCGGCCCGTTTATAAG	AAATCTATCCATGCAAGCATTTACCGCTGGTGAACCGGCGGTTTTTTTTTG
SL1344_0818(SL1344_0818)	ArcZ(ncRNA0002)	+	909693	909783	909819	909822	+	3511914	3511918	3511861	3511861	10	114.892	6.48e-17	CDS	sRNA	GTCGCAGTTACAGCCAGGAGCTTAAGTATGACCGTTAACGTTGTCGTTACAGATATGGACGGCACTTTTCTCGACGATGCCAAGCAGTACGATCGTGTACGCTTCATGGCGCAATACCAGGAACTGAAAA	TTTCCCTGGTGTTGGCGCAGTATTCGCGCACCCCGGTCAAACCGGGGTCATTTTTTTT
SL1344_0829(SL1344_0829).AS	ArcZ(ncRNA0002)	-	924332	924412	924308	924308	+	3511915	3511917	3511860	3511862	11	229.785	6.83e-21	Antisense	sRNA	GCGGCAAGATCGATACGCGCGTTTATCAGCTTGTTGAGAAGATCGGTTCTCAGTCTGTCAACGACCATACCTTTTTTCCTCCTCTTTTCTACCAGGGTTCAACTT	ATTTCCCTGGTGTTGGCGCAGTATTCGCGCACCCCGGTCAAACCGGGGTCATTTTTTT
SL1344_0834(SL1344_0834).AS	ArcZ(ncRNA0002)	-	930883	930906	930860	930870	+	3511913	3511918	3511860	3511864	52	11952	6.82e-122	Antisense	sRNA	TGATATTGTCCGGTCGGTTATTTTTTACACGCCAGGGGATTTTTTTT	ATTTCCCTGGTGTTGGCGCAGTATTCGCGCACCCCGGTCAAACCGGGGTCATTTTTTTT
SL1344_0847(SL1344_0847)	STnc870(ncRNA0205)	+	943791	943822	943848	943866	+	4292596	4292600	4292541	4292563	13	1216.98	2.81e-34	5UTR	sRNA	GTTTAATCTTATTGCGTACTAACGGCTATAAGAATCGTGCAGGTGTGTTTTTGGCATGGAATGCCACATGACTTTA	TTTTCCTTGCCATAGACACCATCCCTGTCTTCCCCCACATGATGTGGGGGTTTTTTTTAT
SL1344_0847(SL1344_0847).AS	ArcZ(ncRNA0002)	-	944128	944195	944092	944143	+	3511913	3511917	3511861	3511863	18	179.84	5.33e-32	Antisense	sRNA	GCCAAAACGATCGGGTAGGCATAAATACCACGCGCATTAACACCAGGCAAAACGGCGCCGCCAGCATCGCCCCGATCAGCGGTCGGATCACCTCGCGCCGGTGA	TTTCCCTGGTGTTGGCGCAGTATTCGCGCACCCCGGTCAAACCGGGGTCATTTTTTT
SL1344_0916(SL1344_0916)	STnc870(ncRNA0205)	+	1020595	1020644	1020687	1020687	+	4292596	4292598	4292541	4292565	11	875.211	5.03e-28	CDS	sRNA	TTTTTATAATAGTTATCAACGGAAGATTAGTATGAAAAATAAATCATTACTACTGGCGGTGGCGATTTCCGCCACGCTACTGGCAGGATGTAA	TTTTCCTTGCCATAGACACCATCCCTGTCTTCCCCCACATGATGTGGGGGTTTTTTTT
SL1344_0938(SL1344_0938)	ArcZ(ncRNA0002)	-	1050118	1050120	1050078	1050090	+	3511915	3511918	3511862	3511862	18	1378.77	3.81e-40	CDS	sRNA	GGTTATTTGCGATATGAAGCTTGACGCCTGGGATAAAAACATT	TTCCCTGGTGTTGGCGCAGTATTCGCGCACCCCGGTCAAACCGGGGTCATTTTTTTT
SL1344_0999(SL1344_0999)	MgrR(ncRNA0043)	+	1104597	1104679	1104635	1104664	+	1550836	1550844	1550760	1550765	14	55.3361	8.72e-20	CDS	sRNA	CCGGTTTTTGTGTGGATGATGCCGCGCTCTATTTTTCCTTTGAAGAAAAATGCCGGGATTTCGAATTA	CAAGAATTTGCCCGGTAGCGTATAAGCAAAACACAAATCTATCCATGCAAGCATTTACCGCTGGTGAACCGGCGGTTTTTTTTTG
SL1344_1008(SL1344_1008)	MgrR(ncRNA0043)	-	1116545	1116607	1116514	1116550	+	1550819	1550845	1550759	1550812	250	1458.02	0	5UTR	sRNA	CCCTTTTACAACAGACTAAAAAACCTCAACTTTGACCATTACGAAACTTGCATGGCGTGATCTGGTTCCGGATAGCGAAAGCTATCAGGAGATA	GCAAGAATTTGCCCGGTAGCGTATAAGCAAAACACAAATCTATCCATGCAAGCATTTACCGCTGGTGAACCGGCGGTTTTTTTTTGC
SL1344_1075(SL1344_1075)	STnc870(ncRNA0205)	+	1183884	1183886	--	--	+	4292591	4292600	4292541	4292556	22	796.044	6.38e-54	CDS	sRNA	GTTACGTGTTGACGGGGATCGTG	TTTTCCTTGCCATAGACACCATCCCTGTCTTCCCCCACATGATGTGGGGGTTTTTTTTAT
SL1344_1093(SL1344_1093)	MgrR(ncRNA0043)	+	1199856	1199871	1199913	1199915	+	1550824	1550844	1550790	1550800	17	2799.87	1.76e-43	CDS	sRNA	TGCCCACTTTATTTTTTGCTGATTGCAGGATACGTACACCATGCCAGTGTTACACAACCG	ACACAAATCTATCCATGCAAGCATTTACCGCTGGTGAACCGGCGGTTTTTTTTTG
SL1344_1098(SL1344_1098)	ArcZ(ncRNA0002)	-	1203833	1203894	1203809	1203815	+	3511914	3511917	3511857	3511861	16	14.306	1.57e-13	CDS	sRNA	GTTAACAACAGATGTAGCCAGGCAATTTATTTCAATATTAGAAGCCGGCATCGCCAAAATAGAATCAGGCGATTACCAGGAAAACG	ACGATTTCCCTGGTGTTGGCGCAGTATTCGCGCACCCCGGTCAAACCGGGGTCATTTTTTT
SL1344_1127(SL1344_1127)	Spf(ncRNA0075)	+	1231896	1231920	1231928	1231967	+	4230557	4230612	4230514	4230530	16	5.78614	7.15e-08	CDS	sRNA	AAACCCATTTGCCGTATTAGCCAGCTTAAAGCGTAAGTAATAGGTCTTCCCCGCGGACGCAGGGATAAACCG	AGGTAAGATGTTCTATCTTTCAGACCTTTTACTTCACGTAATCGGATTTGGCTGAATATTTTAGCCGCCCCAGTCAGTTTATGACTGGGGCGTTTTTTA
SL1344_1167(SL1344_1167)	ArcZ(ncRNA0002)	-	1273544	1273606	1273522	1273569	+	3511914	3511918	3511861	3511862	16	17.7616	6.84e-15	CDS	sRNA	TGTTTATTATCCAGGGAACCGGTCGCCGTCGCTGGCGCGTGGGCGAAAAGCTGCAAATGCGTCAGCACTGCCCACATCCCGACCT	TTTCCCTGGTGTTGGCGCAGTATTCGCGCACCCCGGTCAAACCGGGGTCATTTTTTTT
SL1344_1177(SL1344_1177)	InvR(ncRNA0023)	+	1282922	1282922	1282952	1282965	+	3067584	3067586	3067504	3067512	11	190.442	3.77e-17	CDS	sRNA	ATTCAGGAGACATATGCTCAAACCTATCTGCCATAGTGGAAGTA	TTTTACGGTTGGCCATTTGTCTCTTACGTTGCATTTATCAATCTGCTTTTTGATACAGCAGCACCTCGCTGCTGCTTTTTTTA
SL1344_1190(SL1344_1190)	SdsR(ncRNA0070)	-	1295247	1295301	1295226	1295226	-	1925620	1925621	1925690	1925694	11	986.219	1.76e-28	CDS	sRNA	CTAATCCCATGACAAATAAAAAACACATTTTTTCAATTATCTTTATTGGTTCTCTTTTAACGGGGTGTGCTACAGG	AACTTTTAGCGCACGGCTCTCTCCCAAGAGCCATTTCCCTGGACCGAATACAGGAATCGTATTCGGTCTCTTTTT
SL1344_1196(SL1344_1196)	ArcZ(ncRNA0002)	-	1300909	1300911	--	--	+	3511913	3511918	3511860	3511861	24	1838.44	5.54e-54	CDS	sRNA	GGTTGAAGAGACCAGGGACTACA	ATTTCCCTGGTGTTGGCGCAGTATTCGCGCACCCCGGTCAAACCGGGGTCATTTTTTTT
SL1344_1205(SL1344_1205)	ArcZ(ncRNA0002)	+	1307843	1307870	1307896	1307907	+	3511913	3511919	3511859	3511867	30	55.1551	7.2e-40	CDS	sRNA	TTTTATGTTTCCTTTTTTGTGCAATTTATTGACGTTACTGCGCCGCATACTGGGGTGTCATTTTT	GATTTCCCTGGTGTTGGCGCAGTATTCGCGCACCCCGGTCAAACCGGGGTCATTTTTTTTC
SL1344_1211(SL1344_1211).SL1344_1210(SL1344_1210).IGR	ArcZ(ncRNA0002)	-	1310401	1310441	1310375	1310379	+	3511913	3511918	3511860	3511861	34	656.567	4.7e-42	IGR	sRNA	TCATTACGGCAATATTATTTTTGGCATGGTTTTTTATTGGCGGTTACGCCGCGCCGGGAGCATAACC	ATTTCCCTGGTGTTGGCGCAGTATTCGCGCACCCCGGTCAAACCGGGGTCATTTTTTTT
SL1344_1218(SL1344_1218).SL1344_1217(SL1344_1217).IGR	ArcZ(ncRNA0002)	-	1315120	1315212	--	--	+	3511913	3511919	3511859	3511865	73	120.727	1.84e-115	IGR	sRNA	GATTAATGATGCCTACCAGGCTTCCGATGCGCAGCTCTATCTGAACAAACAACAAAAACAACATCGTTCATCATAGTGCTTCGCAGTAAATGTTCATATTGCACCAGGAGTGA	GATTTCCCTGGTGTTGGCGCAGTATTCGCGCACCCCGGTCAAACCGGGGTCATTTTTTTTC
SL1344_1219(SL1344_1219).SL1344_1218(SL1344_1218).IGR	ChiX(ncRNA0003)	-	1316703	1316709	1316667	1316677	+	555570	555573	555493	555520	11	61.4317	1.56e-15	IGR	sRNA	TATTTTTAAACAGTCTATTAGAGGAATTCTCATCGCTATGGTA	ATCCGAAGCGAAAGCGTCGGGATAATAATAACGATGAAATTCCTCTTTGACGGGCCAATAGCGATATTGGCCATTTTTTTA
SL1344_1221(SL1344_1221)	STnc470(ncRNA0165)	+	1320989	1321041	1321050	1321073	-	94651	94660	94711	94742	65	1847.87	5.03e-184	CDS	sRNA	TATTGGCGGTTACACTTTTGCCGCAGAACATTTGAATAAGGAATTATGGATTGTGACCAAACTTAAACTTCTGGCTCTTGGCGTG	GCATGAAATAATAAGAGAGCGCCAGCAAGGTGCCATGTTACGTCACAATCCACTCAGGGCCGTCTGGAAACGGATGCTGGCCCTCTTTTTTA
SL1344_1226(SL1344_1226)	InvR(ncRNA0023)	+	1326845	1326875	1326882	1326909	+	3067526	3067589	3067498	3067520	3357	2137.11	0	CDS	sRNA	AGGCAATGTGAGCACGTTTAAAGTGAGATGTGAGCAAATGGCTAACCAACCTTCAGCAGAAGAAC	GGTCACTTTTACGGTTGGCCATTTGTCTCTTACGTTGCATTTATCAATCTGCTTTTTGATACAGCAGCACCTCGCTGCTGCTTTTTTTATTT
SL1344_1235(SL1344_1235)	ArcZ(ncRNA0002)	+	1337155	1337270	1337229	1337297	+	3511913	3511919	3511859	3511863	51	64.5521	5.7e-35	CDS	sRNA	TGAATGTCCCGCCGGAAGTTTTCAGCACGCGCGGTCAGTCGTCCCAGCCCTGCATTCAGTGCTGCGTTTACCAGGATCAGAATTACTCCGAAGGCGCGGTAATAAAAGTGGAAGGCGTCTTGCTCCAGTGCCAGCGTGACGAA	GATTTCCCTGGTGTTGGCGCAGTATTCGCGCACCCCGGTCAAACCGGGGTCATTTTTTTTC
SL1344_1255(SL1344_1255)	ArcZ(ncRNA0002)	-	1358330	1358373	1358182	1358310	+	3511914	3511918	3511860	3511861	23	13.4832	2.96e-18	CDS	sRNA	CGAACAGAATCGCTAAAACACAGCGCTTCATAATAAAAAAATCAGGAGAACGGGGATGAATTTTCCATTAATTGCGAACATTGCGGTGTTCGTCATTCTGCTGTTTGTACTGGCGCAGGCCCGTCATAAACAGTGGAGTCTGGCTAAAAAAGTGCTTGTCGGCCTTGTGATGGGCGTGGTCTTTGGTCTGGC	ATTTCCCTGGTGTTGGCGCAGTATTCGCGCACCCCGGTCAAACCGGGGTCATTTTTTTT
SL1344_1255(SL1344_1255)	STnc870(ncRNA0205)	-	1358330	1358374	1358307	1358321	+	4292553	4292600	4292525	4292563	280	3341.28	0	5UTR	sRNA	GCGAACAGAATCGCTAAAACACAGCGCTTCATAATAAAAAAATCAGGAGAACGGGGATGAATTTTCCA	CCCAGTAACAACCCTGTTTTCCTTGCCATAGACACCATCCCTGTCTTCCCCCACATGATGTGGGGGTTTTTTTTAT
SL1344_1263(SL1344_1263)	InvR(ncRNA0023)	-	1365073	1365112	1365024	1365056	+	3067550	3067588	3067487	3067527	81	51.944	1.88e-93	5UTR	sRNA	ATAATATCTGACGCATGTTTTTCAACACCATTTTTCAACATTAAGGCAACGTATCCTCTCAATGACTCGCTGCTGGCAGGAGTTTAGTT	ATTATAGCTATGGTCACTTTTACGGTTGGCCATTTGTCTCTTACGTTGCATTTATCAATCTGCTTTTTGATACAGCAGCACCTCGCTGCTGCTTTTTTTATT
SL1344_1282(SL1344_1282).pps(SL1344_1283).IGR	ArcZ(ncRNA0002)	+	1384398	1384425	1384446	1384459	+	3511913	3511917	3511861	3511862	11	2527.63	1.21e-25	IGR	sRNA	TGAAAAGTGTGTTTCATTTCCTGGAAACGCAGTTTATACCGGGGGTTATTCAGGGAATGCCG	TTTCCCTGGTGTTGGCGCAGTATTCGCGCACCCCGGTCAAACCGGGGTCATTTTTTT
SL1344_1284(SL1344_1284).AS	RprA(ncRNA0058)	+	1387160	1387183	--	--	-	1401684	1401686	1401731	1401733	11	3777.98	1.78e-34	Antisense	sRNA	TATTTATACTTCGCTACCCGTTTTCGACTGAAAAAAGCGATCAC	CGAATTGCTGTGTGTAGTCTTTGCCCGTCTCCTACGATGGGCTTTTTTTT
SL1344_1298(SL1344_1298)	ArcZ(ncRNA0002)	-	1403087	1403098	1403056	1403059	+	3511914	3511917	3511860	3511862	11	34.1571	1.61e-13	CDS	sRNA	AAGTATTTATGGTAAATGTTCGTCAGCCCAGGGATATTGCGCA	ATTTCCCTGGTGTTGGCGCAGTATTCGCGCACCCCGGTCAAACCGGGGTCATTTTTTT
SL1344_1298(SL1344_1298)	MgrR(ncRNA0043)	-	1403022	1403095	1402994	1402994	+	1550836	1550844	1550789	1550796	12	81.2153	5.3e-19	CDS	sRNA	TATTTATGGTAAATGTTCGTCAGCCCAGGGATATTGCGCAAGTGCTGCTATCGGTGCTGTTTTTAGCCATCATGATTGTGGCCTGTTTGTGGATAGTACAGC	AACACAAATCTATCCATGCAAGCATTTACCGCTGGTGAACCGGCGGTTTTTTTTTG
SL1344_1315(SL1344_1315)	ArcZ(ncRNA0002)	-	1421016	1421068	1420974	1420975	+	3511913	3511917	3511861	3511862	19	2183.07	2.62e-43	CDS	sRNA	AAATTAATGGCGATCCACTGTTAGTTATGGGTACTTACCATAAAGGGAAAGTATGTTGTTTTGCCAGTGATTGTTCGCCGCACTGGGGAAGTCCG	TTTCCCTGGTGTTGGCGCAGTATTCGCGCACCCCGGTCAAACCGGGGTCATTTTTTT
SL1344_1365(SL1344_1365)	FnrS(ncRNA0013)	+	1468091	1468110	1468124	1468144	-	1706781	1706787	1706859	1706906	263	67.164	0	CDS	sRNA	GGCTTCAGTCGTAAAAGTAGTTTAAGGAAGCGAGACAATGAGCACCACTATCGA	TCGCAGGTGAATGCAACGTCAAGCGATGGGCGTTGCGCTCCATATTGTCTTACTTCCTTTTTTGAATTACTGCATAGCACAATTGATTCGTACGACGCCGACTTAGATTAGTCGGCTTTTTTTTGC
SL1344_1365(SL1344_1365)	FnrS(ncRNA0013)	+	1468092	1468111	1468124	1468140	-	1706788	1706853	1706859	1706893	73	38.3944	8.61e-85	5UTR	sRNA	GCTTCAGTCGTAAAAGTAGTTTAAGGAAGCGAGACAATGAGCACCACTA	CAACGTCAAGCGATGGGCGTTGCGCTCCATATTGTCTTACTTCCTTTTTTGAATTACTGCATAGCACAATTGATTCGTACGACGCCGACTTAGATTAGTCGGCTTT
SL1344_1384(SL1344_1384)	Spf(ncRNA0075)	-	1484823	1484901	1484789	1484801	+	4230553	4230613	4230528	4230532	37	6.63632	3.85e-11	CDS	sRNA	CCGTTTCCCCTCCAATATAACAATCGGACGGATGAGTCTGACTCATCACGCGCCAGACAATCCCTGTTAATACGGGGCGTAAAAAAGAGGTAAAAGTGTCTACTGCAAACAAA	ATCTTTCAGACCTTTTACTTCACGTAATCGGATTTGGCTGAATATTTTAGCCGCCCCAGTCAGTTTATGACTGGGGCGTTTTTTAT
SL1344_1393(SL1344_1393)	OxyS(ncRNA0050)	-	1492642	1492710	1492622	1492623	-	4364304	4364325	4364350	4364357	55	11327.8	2.25e-197	5UTR	sRNA	AGAATATTCCCTTTTTACCTGCACCCCTGACCTCTCACTGGTGCGGTTTTGTTTATTTTTTATCAGTGACTACTCCGTTGGCATTATAT	CGAAATAACTAAAGCCAACGTGAACTTTTGCGGACCTCTGGTCCGCTTTTTTTT
SL1344_1393(SL1344_1393)	RprA(ncRNA0058)	-	1492651	1492706	1492621	1492627	-	1401682	1401687	1401727	1401732	18	321.757	8.47e-39	5UTR	sRNA	TATTCCCTTTTTACCTGCACCCCTGACCTCTCACTGGTGCGGTTTTGTTTATTTTTTATCAGTGACTACTCCGTTGGCATTATATT	GAATTGCTGTGTGTAGTCTTTGCCCGTCTCCTACGATGGGCTTTTTTTTTA
SL1344_1394(SL1344_1394)	ArcZ(ncRNA0002)	+	1493285	1493303	1493324	1493328	+	3511913	3511919	--	--	53	358.53	2.46e-75	CDS	sRNA	CTTTCATGCGCCCTTAATTATGGGAACGCCAGGGCTAGAGCTTG	CCGGTCAAACCGGGGTCATTTTTTTTC
SL1344_1406(SL1344_1406)	STnc870(ncRNA0205)	+	1508970	1508979	1509003	1509005	+	4292591	4292599	4292540	4292542	23	18309.9	6.76e-72	5UTR	sRNA	TGTTGTTATTAGCGTGTTAAGGCAAGGTAATGGGAC	GTTTTCCTTGCCATAGACACCATCCCTGTCTTCCCCCACATGATGTGGGGGTTTTTTTTA
SL1344_1408(SL1344_1408).pntA(SL1344_1409).IGR	ArcZ(ncRNA0002)	+	1512211	1512251	1512266	1512275	+	3511913	3511918	3511859	3511864	220	2812.35	0	IGR	sRNA	AAGCGCATAAATTTAATAAGTTAATTTAATGTTAATTTCTTGATCGCGCCAGGGGTTTAATGATG	GATTTCCCTGGTGTTGGCGCAGTATTCGCGCACCCCGGTCAAACCGGGGTCATTTTTTTT
SL1344_1412(SL1344_1412).SL1344_1411(SL1344_1411).IGR	ArcZ(ncRNA0002)	-	1516815	1516873	1516789	1516791	+	3511914	3511919	3511860	3511860	14	292.459	3.51e-27	IGR	sRNA	GCAGTGTTGCTTCTCGTCATCGCGGATGATAATTGTCCTCGGTAGTTGAACACGCCTGATTTGTATCATAAGCCAGGAATTAACT	ATTTCCCTGGTGTTGGCGCAGTATTCGCGCACCCCGGTCAAACCGGGGTCATTTTTTTTC
SL1344_1421(SL1344_1421).AS	InvR(ncRNA0023)	+	1525328	1525338	1525373	1525384	+	3067550	3067587	3067486	3067525	49	54.1519	8.97e-58	Antisense	sRNA	GTACAATAATGATACTGCCGGATAGCGAGAGGCTATCCGGCGGCAACGTTAGCTGTT	TATTATAGCTATGGTCACTTTTACGGTTGGCCATTTGTCTCTTACGTTGCATTTATCAATCTGCTTTTTGATACAGCAGCACCTCGCTGCTGCTTTTTTTAT
SL1344_1431(SL1344_1431).AS	ArcZ(ncRNA0002)	-	1536814	1536822	1536789	1536791	+	3511913	3511917	3511859	3511863	17	3.9065e+06	6.69e-41	Antisense	sRNA	GGTTTCTTCACACGTATCACCAGGATGAAAAGAT	GATTTCCCTGGTGTTGGCGCAGTATTCGCGCACCCCGGTCAAACCGGGGTCATTTTTTT
SL1344_1431(SL1344_1431).AS	STnc870(ncRNA0205)	-	1537456	1537506	1537434	1537472	+	4292591	4292598	4292540	4292542	13	449.754	9.34e-30	Antisense	sRNA	CGATTTTTAATGGTGTAATGGTGGGACACTGCCGGCTTAACGCTCTCATCGACGATAACAAGCCGGCAGTCAA	GTTTTCCTTGCCATAGACACCATCCCTGTCTTCCCCCACATGATGTGGGGGTTTTTTTT
SL1344_1471(SL1344_1471).AS	ArcZ(ncRNA0002)	+	1574222	1574227	--	--	+	3511914	3511918	3511860	3511863	34	1953.47	3.25e-76	Antisense	sRNA	GTTCTTTAACTGCATCAGGGATCTCA	ATTTCCCTGGTGTTGGCGCAGTATTCGCGCACCCCGGTCAAACCGGGGTCATTTTTTTT
SL1344_1512(SL1344_1512).AS	ArcZ(ncRNA0002)	-	1624953	1624955	--	--	+	3511913	3511918	3511860	3511862	16	408.52	3.04e-32	Antisense	sRNA	CAATTCCTATCGCCGGGGAAAAC	ATTTCCCTGGTGTTGGCGCAGTATTCGCGCACCCCGGTCAAACCGGGGTCATTTTTTTT
SL1344_1518(SL1344_1518).AS	ArcZ(ncRNA0002)	-	1631737	1631806	1631708	1631720	+	3511913	3511918	3511809	3511862	36	435.453	2.17e-71	Antisense	sRNA	GGTGAGTCCAGCGGGAATCAATGCCCTGATAGTGGCGTTGCAGTGTAATTACGCCGCCAGCCTGGGCTGGTTTTAGCTGTGCCACCAGGGGAATAGACT	AAAACAGGACTGCGCCTTTGACATCATCATAATAAGCACGGCGCAGCCACGATTTCCCTGGTGTTGGCGCAGTATTCGCGCACCCCGGTCAAACCGGGGTCATTTTTTTT
SL1344_1534(SL1344_1534)	ArcZ(ncRNA0002)	-	1652193	1652194	--	--	+	3511916	3511918	3511859	3511862	21	55.4688	2.02e-28	CDS	sRNA	GATTTGTACAACACCGGGGTGG	GATTTCCCTGGTGTTGGCGCAGTATTCGCGCACCCCGGTCAAACCGGGGTCATTTTTTTT
SL1344_1537(SL1344_1537)	MgrR(ncRNA0043)	-	1654988	1655099	1654952	1655095	+	1550820	1550846	1550781	1550804	267	556.539	0	CDS	sRNA	TATTTCCTTTGCATCATTGCGAAGACTAAAGGGATCGTTTCATGCGTACTCATACTTTATTTAAAGTTGCAGTGCTTACTGGCTTGCTGGCGTTATCCGGCTGTGCGTCTAAAGTCACACAGCCGGATAAGTATTCTGGATTCTTAAA	ATAAGCAAAACACAAATCTATCCATGCAAGCATTTACCGCTGGTGAACCGGCGGTTTTTTTTTGCC
SL1344_1581(SL1344_1581)	InvR(ncRNA0023)	+	1698913	1698979	1698969	1699054	+	3067584	3067588	3067517	3067526	21	19.1356	1.23e-18	CDS	sRNA	ATAACTACAGGATGCGCTCACGATTATGCGTGTCCCTCTTTTTTGCGCAATGTAAGGGTGTCATATGCAAACAATTGACGGTAATGGCGCAGTAGCGTCGGTGGCGTTCCGTACCAGCGAGGTTATCGCCATTTACCCGATT	CATTTGTCTCTTACGTTGCATTTATCAATCTGCTTTTTGATACAGCAGCACCTCGCTGCTGCTTTTTTTATT
SL1344_1585(SL1344_1585)	GcvB(ncRNA0014)	+	1704170	1704186	1704212	1704248	+	3156983	3156986	3156801	3156845	12	55.8396	2.23e-16	CDS	sRNA	ATTCAAAAGAATACAAAGAAAGAGCAATACAACCTCAACAAGTTGCAAAAGCGCCTGCGCCGTAACGTTGGCGAAGCGA	TTTTATCGGAATGCGTGTTCTGATGGGCTTTTGGCTTACGGTTGTGATGTTGTGTTGTTGTGTTTGCAATTGGTCTGCGATTCAGACCACGGTAGCGAGACTACCCTTTTTCACTTCCTGTACATTTACCCTGTCTGTCCATAGTGATTAATGTAGCACCGCCATATTGCGGTGCTTTTTTTTGTA
SL1344_1602(SL1344_1602)	ArcZ(ncRNA0002)	+	1722588	1722636	1722672	1722677	+	3511916	3511917	3511861	3511861	13	34.336	9.51e-16	CDS	sRNA	TAGCTTGTTTTTCGTATATCGCACATGCCAGTACCCACCCTCCTCTTATTATCACCAGGGGAGCCGGAGGAGACGCCTCCGGAGCCACAG	TTTCCCTGGTGTTGGCGCAGTATTCGCGCACCCCGGTCAAACCGGGGTCATTTTTTT
SL1344_1627(SL1344_1627)	ArcZ(ncRNA0002)	-	1746415	1746503	1746374	1746374	+	3511915	3511917	3511838	3511862	11	17.8002	1.07e-10	CDS	sRNA	GAGGGGGATTTACTGGGTGTCGAAATCACTACCCATTTTGCATCGTCGCCCGCTCGTCCGCTACATCCTGAGTTTGTTATCTCGTCATGGGACAATTCGCAGAAGCGCCGTTTTCTGCTTGATCTGTTGC	TAATAAGCACGGCGCAGCCACGATTTCCCTGGTGTTGGCGCAGTATTCGCGCACCCCGGTCAAACCGGGGTCATTTTTTT
SL1344_1627(SL1344_1627)	ArcZ(ncRNA0002)	-	1746583	1746640	1746558	1746569	+	3511884	3511919	3511859	3511866	645	2298.29	0	5UTR	sRNA	TGTTTTTTTCGATCATTTTTTATATATTGATCGTTTTTATTGATTGATTTGCGTTAAAAGCGCATTATCAGGGAGTTAAGATC	GATTTCCCTGGTGTTGGCGCAGTATTCGCGCACCCCGGTCAAACCGGGGTCATTTTTTTTC
SL1344_1632(SL1344_1632)	ArcZ(ncRNA0002)	+	1750959	1751001	1751013	1751028	+	3511913	3511919	3511859	3511868	50	177.281	3.77e-47	CDS	sRNA	CACCAGAGCGCCCGATCGCTTTAGCGCCGCGCATTTTTTCCCGCTACTCACCAGGGGAGTTTCATCGGAG	GATTTCCCTGGTGTTGGCGCAGTATTCGCGCACCCCGGTCAAACCGGGGTCATTTTTTTTC
SL1344_1663(SL1344_1663)	GcvB(ncRNA0014)	-	1785374	1785411	1785370	1785376	+	3156960	3156985	3156922	3156926	44	5.62533	7.64e-19	5UTR	sRNA	CTTTTATAACCATAACGATGGAGCGGGTATGAAAAAATTTAC	ACATTTACCCTGTCTGTCCATAGTGATTAATGTAGCACCGCCATATTGCGGTGCTTTTTTTTGT
SL1344_1663(SL1344_1663)	MgrR(ncRNA0043)	-	1785219	1785404	1785193	1785282	+	1550835	1550845	1550765	1550804	34	22.1399	4.78e-22	CDS	sRNA	AACCATAACGATGGAGCGGGTATGAAAAAATTTACAGTGGCGGCACTGGCGTTAACAACTCTTCTCTCAGGCAGCGCGTTCGCGCACGAAGCCGGAGAATTCTTTATGCGTGCAGGTCCGGCAACCGTCAGACCTACAGAAGGGGCGGGTGGTACGCTGGGGCATTTAAACGGGTTTGATGTGAGTAATAACACGCAACTCGGCCTGACATT	ATTTGCCCGGTAGCGTATAAGCAAAACACAAATCTATCCATGCAAGCATTTACCGCTGGTGAACCGGCGGTTTTTTTTTGC
SL1344_1663(SL1344_1663)	RydC(ncRNA0064)	-	1785396	1785412	1785375	1785377	+	1686558	1686590	1686507	1686517	18	7.04194	3.48e-10	5UTR	sRNA	GCTTTTATAACCATAACGATGGAGCGGGTATGAAAAAA	AAATAAGTATAATACCCGCTTCCGATGTAGACCCGTCCTCCTTCGCCTGCGTCACGGGTCCTGGTTAGACGCAGGCGTTTTCTG
SL1344_1678(SL1344_1678).AS	STnc870(ncRNA0205)	-	1798443	1798605	1798421	1798573	+	4292564	4292600	4292541	4292561	104	7649.25	3.42e-271	Antisense	sRNA	TCAGCTCCATCGTAGATGAATGTGCTAAATAATGAGCATTTGTTAAATTTGTGTGTGTTTTCTGGCGCAGGCATAACCTACGATGCGACAGAGAGATATTTTTCTTTCAACTTATTGATTATAAAGAATAAATCAAAGATTTTTAACATTGTTTAACTGTTTTTTTGGGCAGGGATTTTTCCATA	TTTTCCTTGCCATAGACACCATCCCTGTCTTCCCCCACATGATGTGGGGGTTTTTTTTAT
SL1344_1685(SL1344_1685)	ArcZ(ncRNA0002)	-	1807832	1807938	1807802	1807865	+	3511882	3511920	3511858	3511866	709	1444.85	0	5UTR	sRNA	CGCTACCACAGGGACAAGGCTGAGACACAATAATCTCCCTGAATATAAAAAACGGCGTTGAACGCCAGGGTGGCATTATGTTAACTGAGCAGTGGCGATGTTGCTACGTCTTGAAGCCAGGGGAAGTCGTTAAGTAC	CGATTTCCCTGGTGTTGGCGCAGTATTCGCGCACCCCGGTCAAACCGGGGTCATTTTTTTTCC
SL1344_1686(SL1344_1686)	ArcZ(ncRNA0002)	+	1807865	1807874	1807908	1807923	+	3511913	3511917	3511865	3511865	14	74.8151	5.32e-21	5UTR	sRNA	GCCACCCTGGCGTTCAACGCCGTTTTTTATATTCAGGGAGATTATTGTGTCTCAGCCTT	CCTGGTGTTGGCGCAGTATTCGCGCACCCCGGTCAAACCGGGGTCATTTTTTT
SL1344_1767(SL1344_1767)	InvR(ncRNA0023)	-	1893560	1893587	1893532	1893551	+	3067536	3067586	3067503	3067505	13	7.41981	9.6e-08	5UTR	sRNA	GGTTCTCGTAATTTGTGCGACGGATCGAGACACGTTTAAAAATGGCTTGCCATAAT	CTTTTACGGTTGGCCATTTGTCTCTTACGTTGCATTTATCAATCTGCTTTTTGATACAGCAGCACCTCGCTGCTGCTTTTTTTA
SL1344_1768(SL1344_1768)	CyaR(ncRNA0009)	-	1894322	1894449	1894299	1894411	+	2228923	2228932	2228849	2228884	46	31.9393	7.31e-39	CDS	sRNA	TGGTAGAATGACGTCTCTACATTGAGGTGGTGAAATGAACGACGTTTTAAACTCTGGTGCGTTTTCTCTTGCATCTTTAATAGTATCAATGGTGGTTCTGGTGGTGGGGCTGGCGCTCTGGTTCTTTGTCAACCGGGCAAGCTCCCGTGCC	GAAAAACATAACCCATAAATGCTAGCTGTACCAGGAACCACCTCCTTGGCCTGCGTAATCTCCCTTACGCAGGCTTATTTTTTG
SL1344_1776(SL1344_1776)	FnrS(ncRNA0013)	-	1902083	1902087	1902032	1902032	-	1706782	1706785	1706864	1706877	10	12.9929	1.98e-08	CDS	sRNA	CCTGTGTTTAGGAGTAAGACCACGAAGTGATTATATAATGAGCAAAACAGAACTAT	GCGTTGCGCTCCATATTGTCTTACTTCCTTTTTTGAATTACTGCATAGCACAATTGATTCGTACGACGCCGACTTAGATTAGTCGGCTTTTTTTTG
SL1344_1776(SL1344_1776)	STnc870(ncRNA0205)	-	1902016	1902058	1901979	1901984	+	4292597	4292599	4292540	4292561	14	359.373	9.87e-31	CDS	sRNA	ATTATATAATGAGCAAAACAGAACTATACGCGGCGTTAAACCGCGATTTTCAGTCGTTAATGGCAGGTGAAACCAGCTTT	GTTTTCCTTGCCATAGACACCATCCCTGTCTTCCCCCACATGATGTGGGGGTTTTTTTTA
SL1344_1778(SL1344_1778)	MgrR(ncRNA0043)	+	1903394	1903397	1903426	1903430	+	1550829	1550843	1550768	1550768	10	548.94	1.03e-22	CDS	sRNA	GTGGAATGGCTGGATAGCCGCTTACTTTGGGATGCAC	TGCCCGGTAGCGTATAAGCAAAACACAAATCTATCCATGCAAGCATTTACCGCTGGTGAACCGGCGGTTTTTTTTT
SL1344_1785(SL1344_1785)	ArcZ(ncRNA0002)	+	1911358	1911376	1911395	1911398	+	3511914	3511917	3511860	3511862	14	3217.05	1.23e-32	CDS	sRNA	AAAATGTGGTCATGCCGCTTTAACAAGCCAGGGTAATAATA	ATTTCCCTGGTGTTGGCGCAGTATTCGCGCACCCCGGTCAAACCGGGGTCATTTTTTT
SL1344_1871(SL1344_1871)	InvR(ncRNA0023)	-	1989972	1990007	1989939	1989956	+	3067547	3067587	3067502	3067524	48	55.4043	6.1e-57	5UTR	sRNA	TTGCCATCCAACTGCCTGCAAAAAAATTATTTTTATCCGCTGCAATGTAAGAGGCCTACAGGCGGAAGT	ACTTTTACGGTTGGCCATTTGTCTCTTACGTTGCATTTATCAATCTGCTTTTTGATACAGCAGCACCTCGCTGCTGCTTTTTTTAT
SL1344_1874A(SL1344_1874A).AS	ArcZ(ncRNA0002)	+	1992719	1992725	--	--	+	3511915	3511917	3511859	3511864	12	15.5787	6.56e-11	Antisense	sRNA	CGACGTTTAGTAATTACCAGGCATAAG	GATTTCCCTGGTGTTGGCGCAGTATTCGCGCACCCCGGTCAAACCGGGGTCATTTTTTT
SL1344_1896(SL1344_1896)	ArcZ(ncRNA0002)	+	2012934	2013050	2012975	2013076	+	3511884	3511919	3511859	3511862	140	1595.18	3.57e-243	5UTR	sRNA	ACCGTTTTAATTTTGTCTGAGCCGATGAAAAATCCAGGGTTATTTTAATCAAAACATAAAACAATTATTATTTTCCGTCTACGCCATAAAAGACTATCAGGTATTTATATTTTTACTCACTGACATCATCAGGTGATGATTTA	GATTTCCCTGGTGTTGGCGCAGTATTCGCGCACCCCGGTCAAACCGGGGTCATTTTTTTTC
SL1344_1896(SL1344_1896)	RprA(ncRNA0058)	+	2013042	2013077	2013096	2013098	-	1401683	1401693	1401718	1401732	50	5832.59	2.4e-110	CDS	sRNA	ATTTTTACTCACTGACATCATCAGGTGATGATTTATTTATGCACAGCAGAAGCCAAA	GAATTGCTGTGTGTAGTCTTTGCCCGTCTCCTACGATGGGCTTTTTTTTT
SL1344_1917(SL1344_1917)	GcvB(ncRNA0014)	-	2030370	2030387	2030342	2030347	+	3156950	3156984	3156906	3156922	15	48.4723	2.17e-19	CDS	sRNA	TTAGAAGAAAAGACCGAGGAAATCATTTTGGCAGGAAGTAGCTTAC	CTTTTTCACTTCCTGTACATTTACCCTGTCTGTCCATAGTGATTAATGTAGCACCGCCATATTGCGGTGCTTTTTTTTG
SL1344_1917(SL1344_1917)	STnc870(ncRNA0205)	-	2030368	2030389	2030344	2030344	+	4292565	4292601	4292540	4292542	20	1027.06	6.94e-51	CDS	sRNA	TCTTAGAAGAAAAGACCGAGGAAATCATTTTGGCAGGAAGTAGCTT	GTTTTCCTTGCCATAGACACCATCCCTGTCTTCCCCCACATGATGTGGGGGTTTTTTTTATC
SL1344_1954(SL1344_1954)	SL1344_1968(SL1344_1968)	-	2062240	2062247	2062207	2062215	+	2073615	2073618	2073533	2073534	14	21844	7.34e-53	CDS	CDS	GCTACAACTTAAACGATCTTCATGCAGCAGCAGTTGCAAAT	ATTGCTGTGTGAAGTCTTGTCGGCGTCCGGCTCTTCCAACAACAGGAGGAAGGCGACAGTGTTCTGCCGTGACGCCGACCTTTTTA
SL1344_1958(SL1344_1958)	ArcZ(ncRNA0002)	-	2064078	2064108	2064042	2064070	+	3511913	3511918	3511861	3511861	40	92.8598	2.45e-60	3UTR	sRNA	ACGTTGTGTTTTTGGCGAATCAACAATATCAAACCGGGGAAAACGCCGCCACCGCGCGGCAACCATT	TTTCCCTGGTGTTGGCGCAGTATTCGCGCACCCCGGTCAAACCGGGGTCATTTTTTTT
SL1344_1959(SL1344_1959).AS	ArcZ(ncRNA0002)	+	2064655	2064687	2064717	2064720	+	3511916	3511916	3511860	3511865	10	328.262	4.42e-20	Antisense	sRNA	GTGAAGTTTTTGCTGCCCTAACCAGTCTTCAAGTTGTTCGGGCGTCATGCCAGGGTTAAAAAAATA	ATTTCCCTGGTGTTGGCGCAGTATTCGCGCACCCCGGTCAAACCGGGGTCATTTTTT
SL1344_1967(SL1344_1967)	ArcZ(ncRNA0002)	+	2072797	2072836	2072848	2072858	+	3511901	3511919	3511859	3511862	255	247.751	0	CDS	sRNA	GATGATCCCCGATAAATTATTGGTGATATCTGATAACACTAACTACAGGGAATGGAGTATTA	GATTTCCCTGGTGTTGGCGCAGTATTCGCGCACCCCGGTCAAACCGGGGTCATTTTTTTTC
SL1344_1967(SL1344_1967)	STnc870(ncRNA0205)	+	2072732	2072879	2072765	2072910	+	4292567	4292601	4292538	4292561	115	459.747	1.04e-225	CDS	sRNA	CAGTTCGATGGTGATGGCATCTATGTCTTTGGCTTTGATGATAAAATATACGTAAAAAGACTGCAGATGATCCCCGATAAATTATTGGTGATATCTGATAACACTAACTACAGGGAATGGAGTATTACCAAAGACAACGAGTGCAGGTTCGGTGTTTTTGGCAAGGTTCTGATAAGCCA	CTGTTTTCCTTGCCATAGACACCATCCCTGTCTTCCCCCACATGATGTGGGGGTTTTTTTTATC
SL1344_1976(SL1344_1976).AS	ArcZ(ncRNA0002)	-	2079727	2079790	2079751	2079751	+	3511915	3511917	3511861	3511861	10	14.2722	5.58e-09	Antisense	sRNA	GGCGCACATCGAAAAGCTCAACGCTTCCTGTCCAGGGTTG	TTTCCCTGGTGTTGGCGCAGTATTCGCGCACCCCGGTCAAACCGGGGTCATTTTTTT
SL1344_2197(SL1344_2197)	ArcZ(ncRNA0002)	-	2319830	2319856	2319807	2319813	+	3511881	3511912	3511860	3511862	70	149.759	1.59e-123	5UTR	sRNA	ATATAAATGTAAGTAAATTGTGAAGTAATTGTGCTTCCGGGGAAAGAAAG	ATTTCCCTGGTGTTGGCGCAGTATTCGCGCACCCCGGTCAAACCGGGGTCATT
SL1344_2197(SL1344_2197)	ArcZ(ncRNA0002)	-	2319816	2319899	2319771	2319813	+	3511913	3511920	3511859	3511865	2315	5511.67	0	CDS	sRNA	GCGTTAGCAATCTGTTTAAGGACGGGTTGTCAATGATGTGTTAATATAAATGTAAGTAAATTGTGAAGTAATTGTGCTTCCGGGGAAAGAAAGTGAATACATTACAGCTCTCAATTGTTCACCGTCTGC	GATTTCCCTGGTGTTGGCGCAGTATTCGCGCACCCCGGTCAAACCGGGGTCATTTTTTTTCC
SL1344_2202(SL1344_2202)	MgrR(ncRNA0043)	-	2325071	2325110	2325048	2325052	+	1550836	1550844	1550794	1550798	12	134.744	2.38e-21	CDS	sRNA	CAGGTTTTGTATGCGCACATTGTCGCATTTTTGATGATGTTGATGCTCGGCATGGTGTTCACC	AAATCTATCCATGCAAGCATTTACCGCTGGTGAACCGGCGGTTTTTTTTTG
SL1344_2208(SL1344_2208)	ArcZ(ncRNA0002)	+	2331089	2331089	--	--	+	3511916	3511917	3511860	3511862	10	176.756	2.54e-18	CDS	sRNA	ACATCTTATGCCAGGGCTGAA	ATTTCCCTGGTGTTGGCGCAGTATTCGCGCACCCCGGTCAAACCGGGGTCATTTTTTT
SL1344_2250(SL1344_2250).AS	ArcZ(ncRNA0002)	-	2384756	2384804	2384758	2384763	+	3511913	3511918	3511859	3511862	41	785.253	3.25e-86	Antisense	sRNA	AGTTCTTCGACCGTTACCGTACTATTGGCCGCCAGGGGATGATTTTC	GATTTCCCTGGTGTTGGCGCAGTATTCGCGCACCCCGGTCAAACCGGGGTCATTTTTTTT
SL1344_2263(SL1344_2263)	MgrR(ncRNA0043)	-	2400060	2400110	2400032	2400042	+	1550819	1550844	1550763	1550804	163	2123.79	0	CDS	sRNA	TGATTCCTCAGCGTCTGGCAGTACAATTCTGCCGTTTTGGGGAGTTTTTCTTTATGTGCTTGCTGGAAAGGGTAAAAAT	GAATTTGCCCGGTAGCGTATAAGCAAAACACAAATCTATCCATGCAAGCATTTACCGCTGGTGAACCGGCGGTTTTTTTTTG
SL1344_2300(SL1344_2300).lrhA(SL1344_2299).IGR	ArcZ(ncRNA0002)	-	2439241	2439251	2439216	2439219	+	3511915	3511918	3511860	3511861	12	1378.72	3.96e-27	IGR	sRNA	TGGTCCGATTAGTATAACATATCCCAGGTTAAGATT	ATTTCCCTGGTGTTGGCGCAGTATTCGCGCACCCCGGTCAAACCGGGGTCATTTTTTTT
SL1344_2308(SL1344_2308)	STnc870(ncRNA0205)	+	2449264	2449272	2449298	2449315	+	4292591	4292599	4292522	4292556	10	548.697	5.99e-24	CDS	sRNA	CCTCTTTGCTTTGCAACAGGGATAGTCTGTCATGTCTGTCGTTACAGAATCA	GTTCCCAGTAACAACCCTGTTTTCCTTGCCATAGACACCATCCCTGTCTTCCCCCACATGATGTGGGGGTTTTTTTTA
SL1344_2315(SL1344_2315)	STnc870(ncRNA0205)	-	2456616	2456700	2456597	2456657	+	4292565	4292601	4292538	4292551	255	4274.24	0	CDS	sRNA	GCCAGAAATAAGAAGGTTTCCTGATGGTGGAACAGCGTCGTTTGGCAAGTACGGAATGGGTGGATATTGTGAATGAAGACAATGAAGTCATTGCACAGTCCAGC	CTGTTTTCCTTGCCATAGACACCATCCCTGTCTTCCCCCACATGATGTGGGGGTTTTTTTTATC
SL1344_2316(SL1344_2316).SL1344_2315(SL1344_2315).IGR	STnc870(ncRNA0205)	-	2456718	2456795	--	--	+	4292598	4292599	4292540	4292547	12	198.92	9.96e-24	IGR	sRNA	TGTTGAGCGTAATCGCACTCAATGATCAAAGTATCATTGCGCAGGTTGCAATTAACTCGTAATTTACCTCACAAACGTAAATGCGCCGTAAGAGCGCC	GTTTTCCTTGCCATAGACACCATCCCTGTCTTCCCCCACATGATGTGGGGGTTTTTTTTA
SL1344_2327(SL1344_2327)	ArcZ(ncRNA0002)	-	2467152	2467183	2467116	2467126	+	3511913	3511917	3511860	3511861	32	490.275	1.68e-64	CDS	sRNA	GTTTAAATAGCGAGCCGGTGGTATTACGGGCATTATCGCAAGAAGCCCAACGCCAGGGGAAAACGCAT	ATTTCCCTGGTGTTGGCGCAGTATTCGCGCACCCCGGTCAAACCGGGGTCATTTTTTT
SL1344_2355(SL1344_2355).AS	ArcZ(ncRNA0002)	-	2494935	2495001	2494907	2494962	+	3511916	3511918	3511861	3511863	10	53.4379	3.84e-14	Antisense	sRNA	TCTTCCACTTCAATCAACACCAGCAGCGCGGCGTCGCCGCCGTACTCTTTCGGCGCCTGATGAAAGGCCATCACATGCGGATGCTGCGCCAGCCA	TTTCCCTGGTGTTGGCGCAGTATTCGCGCACCCCGGTCAAACCGGGGTCATTTTTTTT
SL1344_2379(SL1344_2379)	ArcZ(ncRNA0002)	+	2527393	2527398	--	--	+	3511913	3511918	3511861	3511861	13	114.894	1.39e-21	CDS	sRNA	GTTTGTTACAACGCTTAGGGATACGC	TTTCCCTGGTGTTGGCGCAGTATTCGCGCACCCCGGTCAAACCGGGGTCATTTTTTTT
SL1344_2402(SL1344_2402).AS	CyaR(ncRNA0009)	-	2549226	2549265	2549203	2549209	+	2228927	2228932	2228865	2228874	16	14.3225	1.53e-13	Antisense	sRNA	CCTTTTATAATAAAAGCTCGTCTGTTGTTCTTATTGTTGTATTTGTTCCTGGCAAAGCGTCAT	AAATGCTAGCTGTACCAGGAACCACCTCCTTGGCCTGCGTAATCTCCCTTACGCAGGCTTATTTTTTG
SL1344_2482(SL1344_2482)	ArcZ(ncRNA0002)	-	2651925	2651960	2651888	2651903	+	3511892	3511918	3511860	3511863	192	608.93	0	CDS	sRNA	TCCATCTGAGAGGGACCCGATGCAATTGCGTAAATTACTTCTGCCAGGGTTGCTTTCCGTTACCCTGCTCAGC	ATTTCCCTGGTGTTGGCGCAGTATTCGCGCACCCCGGTCAAACCGGGGTCATTTTTTTT
SL1344_2487(SL1344_2487)	ArcZ(ncRNA0002)	-	2657627	2657702	2657584	2657626	+	3511913	3511919	3511860	3511877	155	230.002	2.28e-275	5UTR	sRNA	GTGGCATCCTTACGCCAGAATTTGTACAATGCAGCGCCCCCGGACGAGCAGTAAGCTTACCGGGGCGTTTCTTTTTTCAACCCTCCAGGGGCCATAACGTGTAATAACGAGGCCGGAAT	ATTTCCCTGGTGTTGGCGCAGTATTCGCGCACCCCGGTCAAACCGGGGTCATTTTTTTTC
SL1344_2494(SL1344_2494)	ArcZ(ncRNA0002)	-	2670434	2670454	2670411	2670413	+	3511913	3511917	3511859	3511862	45	574.59	1.08e-91	5UTR	sRNA	CATCAACCGTTGCTGACAGGCCGTTAAGGCCAGGGATGAAAGAT	GATTTCCCTGGTGTTGGCGCAGTATTCGCGCACCCCGGTCAAACCGGGGTCATTTTTTT
SL1344_2494(SL1344_2494)	ArcZ(ncRNA0002)	-	2669949	2669963	2669907	2669917	+	3511913	3511917	3511861	3511861	11	76.5949	6.8e-17	CDS	sRNA	GATTACCACGCGTGATGTCCAGCCCAGCGTCGGCTTTGCCAGCCGGGGATCGCTGCT	TTTCCCTGGTGTTGGCGCAGTATTCGCGCACCCCGGTCAAACCGGGGTCATTTTTTT
SL1344_2506(SL1344_2506)	ArcZ(ncRNA0002)	-	2681047	2681055	2681023	2681023	+	3511914	3511919	3511860	3511862	82	336.628	2.61e-155	CDS	sRNA	TGATATTTCTGAACGTCAGGGGATTTCCCTTTC	ATTTCCCTGGTGTTGGCGCAGTATTCGCGCACCCCGGTCAAACCGGGGTCATTTTTTTTC
SL1344_2509(SL1344_2509).AS	ArcZ(ncRNA0002)	-	2683829	2683865	2683808	2683808	+	3511913	3511918	3511860	3511862	11	229.785	6.83e-21	Antisense	sRNA	TGTTTGGGCTCCCGGGCGAGGGCATACAATTTCTCACTGTCCTGCCAGGGAATAACAT	ATTTCCCTGGTGTTGGCGCAGTATTCGCGCACCCCGGTCAAACCGGGGTCATTTTTTTT
SL1344_2547(SL1344_2547).AS	ArcZ(ncRNA0002)	-	2729444	2729447	--	--	+	3511916	3511917	3511860	3511861	10	2.29783e+06	2.33e-24	Antisense	sRNA	GGGTTAAAGCATCCGGGGAAACTG	ATTTCCCTGGTGTTGGCGCAGTATTCGCGCACCCCGGTCAAACCGGGGTCATTTTTTT
SL1344_2594(SL1344_2594)	RprA(ncRNA0058)	+	2770111	2770128	2770148	2770152	-	1401682	1401687	1401731	1401736	14	539.07	1.71e-33	3UTR	sRNA	GGAAATGCAATAGCGGCTTTACTTACACGGCAACAATAATTT	CAACGAATTGCTGTGTGTAGTCTTTGCCCGTCTCCTACGATGGGCTTTTTTTTTA
SL1344_2610(SL1344_2610)	STnc440(ncRNA0162)	-	2786719	2786777	2786682	2786701	+	4580542	4580567	4580492	4580520	84	1415.55	1.13e-222	CDS	sRNA	CAAGCAACAATGGTTTTACCAATTGGCCGGGATTAGGCCGACCGAAATCAAATAATTTTGCCTGGGGAGGCATCACATGATTACAGGTATCCAGAT	ATTACTTTGTGGTGTAGCGTAACGGTAATTGTCCTCCTCATATTTGCGGCAGCGTAGTCTGCCGCTTTTTTTTATA
SL1344_2629(SL1344_2629)	MgrR(ncRNA0043)	+	2813412	2813435	2813458	2813474	+	1550841	1550844	1550794	1550799	12	55.4085	3.59e-17	CDS	sRNA	CGATTTATCCTTCTGTTATCGCTATTATTAGCAAGCTTGCCTCTGTATGCTCAACGCGTCACG	AAATCTATCCATGCAAGCATTTACCGCTGGTGAACCGGCGGTTTTTTTTTG
SL1344_2633(SL1344_2633)	STnc870(ncRNA0205)	-	2817661	2817700	2817633	2817638	+	4292566	4292599	4292539	4292547	36	4779.31	3.65e-105	CDS	sRNA	ACCAATATAGATCGCTAAATTTTTGTTGTAAACAAAATTTTTGTTGGTGTGATATGGCGAAAAATGAT	TGTTTTCCTTGCCATAGACACCATCCCTGTCTTCCCCCACATGATGTGGGGGTTTTTTTTA
SL1344_2662(SL1344_2662)	SdsR(ncRNA0070)	+	2850273	2850304	2850320	2850332	-	1925620	1925671	1925686	1925693	115	4.36051e+07	5.6e-272	CDS	sRNA	GCAACAAGCGGTGATATTTAAAAGGGATAAACTATGGGAAGAGTCGCGCCTGTCGCCATC	ACTTTTAGCGCACGGCTCTCTCCCAAGAGCCATTTCCCTGGACCGAATACAGGAATCGTATTCGGTCTCTTTTT
SL1344_2696(SL1344_2696)	ArcZ(ncRNA0002)	-	2878793	2878809	2878771	2878776	+	3511892	3511919	3511860	3511869	1132	4620.4	0	CDS	sRNA	AAGAGAAGAAATGTATTATGACTGGGGAAGTAAAAATTT	ATTTCCCTGGTGTTGGCGCAGTATTCGCGCACCCCGGTCAAACCGGGGTCATTTTTTTTC
SL1344_2697(SL1344_2697)	MgrR(ncRNA0043)	-	2879021	2879067	2878987	2878987	+	1550835	1550844	1550792	1550800	10	30.4966	4.02e-12	3UTR	sRNA	TGCATGGCTTTGCTGCATGGATCTGCATGATCGTTTGAGGATCGTTTTTGATGAGGCCCGCTAGAACTGGCGGGCTTTTGC	ACAAATCTATCCATGCAAGCATTTACCGCTGGTGAACCGGCGGTTTTTTTTTG
SL1344_2698(SL1344_2698)	ArcZ(ncRNA0002)	-	2880132	2880177	2880109	2880122	+	3511914	3511918	3511860	3511862	73	883.218	6.38e-154	CDS	sRNA	TGCAATGCCTCATGATATTCAGGAAGTGTATGTTACTATCTTTGATAAGCATCAGGGATTGATCGGCTT	ATTTCCCTGGTGTTGGCGCAGTATTCGCGCACCCCGGTCAAACCGGGGTCATTTTTTTT
SL1344_2698(SL1344_2698)	RprA(ncRNA0058)	-	2880419	2880471	2880393	2880394	-	1401683	1401687	1401731	1401733	11	1169.37	5.41e-30	CDS	sRNA	TAGTTATGTCGAGTTTGGGAAAGTTGACCTCTCTGACGTTTTTTTTGACTCGCTTAAAAATGACTACCCAGCTTTTGAA	CGAATTGCTGTGTGTAGTCTTTGCCCGTCTCCTACGATGGGCTTTTTTTTT
SL1344_2715(SL1344_2715)	ArcZ(ncRNA0002)	-	2893368	2893400	2893346	2893354	+	3511915	3511917	3511860	3511863	11	842.544	3.64e-24	CDS	sRNA	GGGTTATATGGTCTTTATGAGAAGCCATTTAACATTGAAGTCATCAGGAAAAACT	ATTTCCCTGGTGTTGGCGCAGTATTCGCGCACCCCGGTCAAACCGGGGTCATTTTTTT
SL1344_2738(SL1344_2738)	RprA(ncRNA0058)	+	2915003	2915043	--	--	-	1401683	1401686	1401729	1401733	10	1488.11	2.69e-28	CDS	sRNA	AACCATTTTAAGAAGAGCTATTATGTCCCTCCCTACAAATTTTAATGATATTCTTCGTTTT	CGAATTGCTGTGTGTAGTCTTTGCCCGTCTCCTACGATGGGCTTTTTTTTT
SL1344_2752(SL1344_2752)	RprA(ncRNA0058)	-	2933044	2933076	2933023	2933023	-	1401682	1401692	1401729	1401740	74	5086.34	5.45e-187	5UTR	sRNA	GTGTAAAGAGTATGATTCAGAACAAAGACAGTCATTAGCTCGCACAGCACACAA	GAAACAACGAATTGCTGTGTGTAGTCTTTGCCCGTCTCCTACGATGGGCTTTTTTTTTA
SL1344_2770(SL1344_2770)	Spf(ncRNA0075)	+	2957100	2957143	2957156	2957197	+	4230567	4230612	4230530	4230543	16	11.7084	6.92e-12	CDS	sRNA	TCACATAATCACAAAAATCTTCTTCCGAACCTGAAAAATCCGGACGTCCGGCGTGAGGATAAAAAATGAAAAAACAATTACTTCGTACCCTTACTGCA	CTTTCAGACCTTTTACTTCACGTAATCGGATTTGGCTGAATATTTTAGCCGCCCCAGTCAGTTTATGACTGGGGCGTTTTTTA
SL1344_2780(SL1344_2780)	MgrR(ncRNA0043)	-	2968461	2968491	2968434	2968434	+	1550821	1550844	1550786	1550796	13	1605.72	2.2e-32	5UTR	sRNA	TGCTTAGAGATAAAATCTCTTTTTAAACAATGACTAATTTTGCTTGTATGGAGTGTAT	CAAAACACAAATCTATCCATGCAAGCATTTACCGCTGGTGAACCGGCGGTTTTTTTTTG
SL1344_2797(SL1344_2797).AS	ArcZ(ncRNA0002)	-	2983246	2983303	2983220	2983248	+	3511914	3511917	3511860	3511866	37	500.205	1.6e-74	Antisense	sRNA	CGGTATAAAAATAACCATGATAAATGAATAGCATAACCTTAACAGACTGGGGAGCTCCTTAACACCCTAAGGAGCTTAAACAAA	ATTTCCCTGGTGTTGGCGCAGTATTCGCGCACCCCGGTCAAACCGGGGTCATTTTTTT
SL1344_2797(SL1344_2797).AS	GcvB(ncRNA0014)	-	2983272	2983303	2983220	2983252	+	3156982	3156985	3156922	3156922	14	40.7166	2.52e-17	Antisense	sRNA	CGGTATAAAAATAACCATGATAAATGAATAGCATAACCTTAACAGACTGGGGAGCTCCTTAACACCCTAAGGAGCTTAAACAAA	ACATTTACCCTGTCTGTCCATAGTGATTAATGTAGCACCGCCATATTGCGGTGCTTTTTTTTGT
SL1344_2880(SL1344_2880)	ArcZ(ncRNA0002)	+	3067933	3067967	3067988	3068004	+	3511915	3511917	3511861	3511861	11	229.785	6.83e-21	CDS	sRNA	ATTTTGTGATGAACTTGGGATTGGCATTGAGTCAGGTGCTGCTATCCTCGCCGGGCAACCGTGGTTAAAAAC	TTTCCCTGGTGTTGGCGCAGTATTCGCGCACCCCGGTCAAACCGGGGTCATTTTTTT
SL1344_2984(SL1344_2984)	MgrR(ncRNA0043)	+	3185690	3185787	3185732	3185811	+	1550814	1550847	1550762	1550804	2391	940.249	0	5UTR	sRNA	CGCTTCTTTTTTTGGCAGGACTTTGTTCGATGTTATTTGCATGGATAACCGATCCTAATGCCTGGCTGGCGCTCGGTACGCTGACGCTGCTGGAGATTGTACTTGGGATCGACAACATTATT	AGAATTTGCCCGGTAGCGTATAAGCAAAACACAAATCTATCCATGCAAGCATTTACCGCTGGTGAACCGGCGGTTTTTTTTTGCCT
SL1344_2984(SL1344_2984)	MgrR(ncRNA0043)	+	3185624	3185686	3185733	3185807	+	1550825	1550844	1550760	1550800	29	149.283	1.27e-50	CDS	sRNA	ACACCGTTCCTGGTTGCGCAAATTCAGCCTGGGCTTTCGCCCGTCACTCGACGGGCCTATAATTACCGCTTCTTTTTTTGGCAGGACTTTGTTCGATGTTATTTGCATGGATAACCGATCCTAATGCCTGGCTGGCGCTCGGTACGCTGACGCTGCTGGAGATTGTACTTGGGATCGACAACAT	CAAGAATTTGCCCGGTAGCGTATAAGCAAAACACAAATCTATCCATGCAAGCATTTACCGCTGGTGAACCGGCGGTTTTTTTTTG
SL1344_3000(SL1344_3000)	RybD(ncRNA0062)	+	3204797	3204884	3204876	3204928	+	807425	807432	807390	807398	37	103.354	1.34e-59	CDS	sRNA	CTTTCCGCGCTCTCGATGATGCCCAATGCGCCGGCCTGGCTCTCTATTTCCGGTATTATCGTTGCCGTCGTGGCCATGTCGAAATCTTTCCTCGGCACCTATTTCGGCGTCATCGAGGGCGCAACCGAAATG	CGTTTTCGACATGGTTGGCCACCTTTACGGTGGCCTTTTTTAT
SL1344_3043(SL1344_3043)	STnc870(ncRNA0205)	-	3250031	3250061	3250002	3250004	+	4292579	4292599	4292541	4292542	18	754.01	4.8e-44	5UTR	sRNA	AGTTCTTTTCGTGAGAATGATCTCATTTGCTTGTTTTGCTATGACCAAGGAATATTGAAT	TTTTCCTTGCCATAGACACCATCCCTGTCTTCCCCCACATGATGTGGGGGTTTTTTTTA
SL1344_3071(SL1344_3071)	ArcZ(ncRNA0002)	+	3278766	3278774	--	--	+	3511914	3511917	3511859	3511868	46	440.522	6.19e-91	5UTR	sRNA	CTGTCGTTTTTTTGAACCAGGAAACAGAA	GATTTCCCTGGTGTTGGCGCAGTATTCGCGCACCCCGGTCAAACCGGGGTCATTTTTTT
SL1344_3084(SL1344_3084)	RprA(ncRNA0058)	-	3289265	3289269	3289237	3289237	-	1401683	1401686	1401731	1401732	17	1332.65	2.04e-46	5UTR	sRNA	CCGTTTTCAGAACTCAAACACAGCAGACTACAC	GAATTGCTGTGTGTAGTCTTTGCCCGTCTCCTACGATGGGCTTTTTTTTT
SL1344_3086(SL1344_3086).mltC(SL1344_3087).IGR	GcvB(ncRNA0014)	+	3290790	3290829	3290842	3290858	+	3156983	3156985	3156828	3156842	10	27.698	2.31e-11	IGR	sRNA	GGATAAGCCCTTAGCGTCGCTGCCCGGCAACATGGCATAACGACAACACAACATGCACTCCCGGAATGA	CTTTTGGCTTACGGTTGTGATGTTGTGTTGTTGTGTTTGCAATTGGTCTGCGATTCAGACCACGGTAGCGAGACTACCCTTTTTCACTTCCTGTACATTTACCCTGTCTGTCCATAGTGATTAATGTAGCACCGCCATATTGCGGTGCTTTTTTTTGT
SL1344_3105(SL1344_3105)	ArcZ(ncRNA0002)	-	3312340	3312404	3312316	3312316	+	3511913	3511918	3511861	3511862	11	84.2544	2.84e-17	5UTR	sRNA	ATGGCAGAGAGCGTTCAGTATAACCTCAATTGTATTTGGCCACAGCGGGCCAAAACCCTCTATTGCTTTGCAACCAGCGGAATAACGTT	TTTCCCTGGTGTTGGCGCAGTATTCGCGCACCCCGGTCAAACCGGGGTCATTTTTTTT
SL1344_3112(SL1344_3112)	ArcZ(ncRNA0002)	-	3321570	3321589	3321548	3321554	+	3511914	3511919	3511860	3511861	37	101.232	4.52e-57	CDS	sRNA	GTAAAATAACGATGCACGATCAGTGTCGGCTGGGGAAATGGT	ATTTCCCTGGTGTTGGCGCAGTATTCGCGCACCCCGGTCAAACCGGGGTCATTTTTTTTC
SL1344_3142(SL1344_3142).SL1344_3141(SL1344_3141).IGR	ArcZ(ncRNA0002)	-	3349242	3349274	3349217	3349220	+	3511915	3511917	3511860	3511863	22	361.117	3.66e-43	IGR	sRNA	TTTGTACGAAATATTTAGCCACGCGCCGTAATATTTAACCTACCAGGGTTGATATATT	ATTTCCCTGGTGTTGGCGCAGTATTCGCGCACCCCGGTCAAACCGGGGTCATTTTTTT
SL1344_3169(SL1344_3169)	ArcZ(ncRNA0002)	+	3379603	3379670	3379642	3379642	+	3511915	3511917	3511859	3511863	13	995.747	1.05e-28	5UTR	sRNA	ACTACAATAAGAGCTAACACTTACCAGTTCAGGGAAACCA	GATTTCCCTGGTGTTGGCGCAGTATTCGCGCACCCCGGTCAAACCGGGGTCATTTTTTT
SL1344_3198(SL1344_3198)	GcvB(ncRNA0014)	+	3414122	3414175	3414173	3414205	+	3156865	3156985	3156835	3156856	73	28.8049	1.32e-32	5UTR	sRNA	GGCAAACACTTTGTTACATCCTGAAAGATGCGCCGTAAGAGCGTGCAGGGGATGACCAGCAACACAATACAAGGAATATGAAAT	CTTACGGTTGTGATGTTGTGTTGTTGTGTTTGCAATTGGTCTGCGATTCAGACCACGGTAGCGAGACTACCCTTTTTCACTTCCTGTACATTTACCCTGTCTGTCCATAGTGATTAATGTAGCACCGCCATATTGCGGTGCTTTTTTTTGT
SL1344_3198(SL1344_3198).SL1344_3199(SL1344_3199).IGR	MgrR(ncRNA0043)	+	3415673	3415684	--	--	+	1550835	1550843	1550794	1550804	10	352.89	2.16e-21	IGR	sRNA	CTCAACGACGCGTAATTTCTATAACGGACTTC	AAATCTATCCATGCAAGCATTTACCGCTGGTGAACCGGCGGTTTTTTTTT
SL1344_3199(SL1344_3199)	ArcZ(ncRNA0002)	+	3415818	3415874	3415852	3415898	+	3511916	3511918	3511859	3511862	15	14.5436	7.14e-13	5UTR	sRNA	GATAAAAACTCCAACTCTGTTGCGGCAGTGCAAACCTCAGATCACCGGCGTGACGTTAACCGATTCTCCAGGAATACTGAA	GATTTCCCTGGTGTTGGCGCAGTATTCGCGCACCCCGGTCAAACCGGGGTCATTTTTTTT
SL1344_3199(SL1344_3199)	MgrR(ncRNA0043)	+	3415688	3415747	3415759	3415771	+	1550821	1550845	1550791	1550805	438	971.906	0	5UTR	sRNA	TTTCTATAACGGACTTCGTTGACCTTTGTTACAATTAGATGCATTTTGAATTTTTGTGTGTTAGTGCTTGCTTACTTCACAACT	CACAAATCTATCCATGCAAGCATTTACCGCTGGTGAACCGGCGGTTTTTTTTTGC
SL1344_3224(SL1344_3224)	ArcZ(ncRNA0002)	-	3442078	3442107	3442041	3442056	+	3511913	3511917	3511861	3511862	17	279.035	1.68e-32	CDS	sRNA	GGTGAATTGCTCGTCGAGTTTCTGGCAAAAAAAGAGAACCAGGGATTTTCCTCACCGGGGGAATTTT	TTTCCCTGGTGTTGGCGCAGTATTCGCGCACCCCGGTCAAACCGGGGTCATTTTTTT
SL1344_3240(SL1344_3240)	ArcZ(ncRNA0002)	+	3456906	3457009	3457032	3457042	+	3511914	3511919	3511859	3511862	87	186.734	3.26e-76	5UTR	sRNA	ATTAGGGCCGCAGGATGTCGAAATTCGTATCCCTTCACACCACAGCGCGCGCATTCAGGAAATGCATATGCTGACGGTAAACTGCCTGTGCGATTTGATCGATAACACGCTTTTTCCTCACCAGGATGATTAAGGAG	GATTTCCCTGGTGTTGGCGCAGTATTCGCGCACCCCGGTCAAACCGGGGTCATTTTTTTTC
SL1344_3246(SL1344_3246)	ArcZ(ncRNA0002)	-	3460786	3460788	--	--	+	3511913	3511918	3511861	3511861	21	87.7417	5.46e-32	5UTR	sRNA	AGGACTATTGAAACAGGGAGTAA	TTTCCCTGGTGTTGGCGCAGTATTCGCGCACCCCGGTCAAACCGGGGTCATTTTTTTT
SL1344_3247(SL1344_3247)	InvR(ncRNA0023)	+	3461026	3461071	3461099	3461103	+	3067549	3067586	3067503	3067512	11	16.8037	6.13e-10	CDS	sRNA	TCGAAAACGGCGCTGACGCCGTTTATATCGGGTTAAAAGACGATACCAATGCCCGTCATTTTGCCGGCCTTAACTTTA	CTTTTACGGTTGGCCATTTGTCTCTTACGTTGCATTTATCAATCTGCTTTTTGATACAGCAGCACCTCGCTGCTGCTTTTTTTA
SL1344_3254(SL1344_3254)	STnc870(ncRNA0205)	-	3469262	3469276	3469236	3469237	+	4292593	4292599	4292546	4292556	12	136.402	7.08e-22	CDS	sRNA	GCTTCGAAAAATCGGATAAAGAGCAATGGGGATGGAACATT	CTTGCCATAGACACCATCCCTGTCTTCCCCCACATGATGTGGGGGTTTTTTTTA
SL1344_3270(SL1344_3270)	InvR(ncRNA0023)	+	3488864	3488868	--	--	+	3067542	3067586	3067518	3067525	24	207.759	2.27e-36	5UTR	sRNA	GTTTTCAATCCCAACGTAAGCAAAA	ATTTGTCTCTTACGTTGCATTTATCAATCTGCTTTTTGATACAGCAGCACCTCGCTGCTGCTTTTTTTA
SL1344_3272(SL1344_3272)	ArcZ(ncRNA0002)	+	3490054	3490086	3490113	3490113	+	3511913	3511918	3511860	3511863	35	309.374	2.11e-66	CDS	sRNA	TGTTAGCGCGAGATTATGCGATTTTCCAGATTTATCATCGGATTGACCACCAGTATAGCG	ATTTCCCTGGTGTTGGCGCAGTATTCGCGCACCCCGGTCAAACCGGGGTCATTTTTTTT
SL1344_3283(SL1344_3283)	InvR(ncRNA0023)	-	3499081	3499095	3499046	3499056	+	3067531	3067586	3067527	3067527	11	71.4157	7.18e-15	CDS	sRNA	ACAATAAGAATTCTGGCGATGCGCCAGCCGCAACGGAAGGTCATACTGAA	TTACGTTGCATTTATCAATCTGCTTTTTGATACAGCAGCACCTCGCTGCTGCTTTTTTTA
SL1344_3286(SL1344_3286)	ArcZ(ncRNA0002)	+	3501797	3501820	3501847	3501857	+	3511915	3511917	3511859	3511862	16	29.4133	4.47e-18	CDS	sRNA	GCTATGGCTGTTATTCATTGTTAAAATCGCGCGTCTGGCCGAACGCCAGGGGAATGACAGC	GATTTCCCTGGTGTTGGCGCAGTATTCGCGCACCCCGGTCAAACCGGGGTCATTTTTTT
SL1344_3287(SL1344_3287)	ArcZ(ncRNA0002)	+	3502368	3502387	3502409	3502415	+	3511884	3511919	3511860	3511862	101	277.49	1.45e-146	CDS	sRNA	GAAACGGATTATGTCGCATTTAGCGTTGCAACCGGGGTTTGACTTTCA	ATTTCCCTGGTGTTGGCGCAGTATTCGCGCACCCCGGTCAAACCGGGGTCATTTTTTTTC
SL1344_3335(SL1344_3335)	STnc870(ncRNA0205)	-	3551271	3551296	3551242	3551251	+	4292591	4292600	4292541	4292550	23	18309.9	6.76e-72	5UTR	sRNA	ATGCTTAGTAGTAAAACAGACAATTGTCTGTCGGGGATGGTGGCTGGCTATGAAT	TTTTCCTTGCCATAGACACCATCCCTGTCTTCCCCCACATGATGTGGGGGTTTTTTTTAT
SL1344_3339(SL1344_3339)	ArcZ(ncRNA0002)	+	3554673	3554680	3554714	3554717	+	3511915	3511917	3511859	3511859	22	2527.82	2.8e-50	5UTR	sRNA	ATCTATATTATGTGATCTAAATCACTTTTAAGCCAGAGTGAATAA	GATTTCCCTGGTGTTGGCGCAGTATTCGCGCACCCCGGTCAAACCGGGGTCATTTTTTT
SL1344_3351(SL1344_3351)	ArcZ(ncRNA0002)	+	3570756	3570779	3570831	3570831	+	3511914	3511917	3511860	3511861	11	93.616	1.09e-17	CDS	sRNA	CTGTTAGGATTATGGTGTTTCGTTTGGGCTACGCTGCATTTAACCAGCTATGCCTTACTGGAACTGGGGATACATA	ATTTCCCTGGTGTTGGCGCAGTATTCGCGCACCCCGGTCAAACCGGGGTCATTTTTTT
SL1344_3357(SL1344_3357)	ArcZ(ncRNA0002)	+	3577404	3577414	3577450	3577464	+	3511914	3511920	3511860	3511862	46	12.2648	3.39e-33	CDS	sRNA	CATTATCTGGACACTGGGGAGCTGCTTCCGCCGCTGCCGCTGGCAGAGGTAAAGCGCTTGC	ATTTCCCTGGTGTTGGCGCAGTATTCGCGCACCCCGGTCAAACCGGGGTCATTTTTTTTCC
SL1344_3483(SL1344_3483)	ArcZ(ncRNA0002)	-	3701155	3701175	3701135	3701137	+	3511913	3511919	3511860	3511863	38	264.648	2.57e-70	3UTR	sRNA	GGTTTTATGATTAAACAAATTTACACACCAGGACGTTGCCT	ATTTCCCTGGTGTTGGCGCAGTATTCGCGCACCCCGGTCAAACCGGGGTCATTTTTTTTC
SL1344_3500(SL1344_3500)	ArcZ(ncRNA0002)	-	3719917	3720006	3719874	3719875	+	3511913	3511918	3511859	3511863	60	270.422	1.76e-110	CDS	sRNA	TATTTGCTTACCTTCTGGAGTGCGATGGCGCAACGTTTACCCAGATCCATCAAAATTCAGGGATTGCGAAAAGCAGTACCTCATCTTTGCTCAACGGCATGGTGGAGCATGGGTTATTACGCCAGGAAAAAGA	GATTTCCCTGGTGTTGGCGCAGTATTCGCGCACCCCGGTCAAACCGGGGTCATTTTTTTT
SL1344_3557(SL1344_3557)	STnc870(ncRNA0205)	+	3782898	3782916	3782930	3782939	+	4292576	4292599	4292541	4292550	22	2189.12	7.92e-61	5UTR	sRNA	TCATACGTTTCGGGATGGCATTAAAAGGCGAAGGAATATGAA	TTTTCCTTGCCATAGACACCATCCCTGTCTTCCCCCACATGATGTGGGGGTTTTTTTTA
SL1344_3566(SL1344_3566)	ArcZ(ncRNA0002)	-	3795657	3795742	3795678	3795678	+	3511914	3511918	3511860	3511867	32	689.359	1.64e-41	5UTR	sRNA	ATAATACATTATGAGTCATTTATGGCGAATCCTCGCCTGTATCATTGATGGAACCAGAGGAAAGC	ATTTCCCTGGTGTTGGCGCAGTATTCGCGCACCCCGGTCAAACCGGGGTCATTTTTTTT
SL1344_3569(SL1344_3569)	FnrS(ncRNA0013)	-	3800129	3800208	3800108	3800142	-	1706782	1706785	1706867	1706882	12	7.91572	1.2e-07	CDS	sRNA	AAAACATAATTAAAAGAAAACGAAGATCTCGTCGCGGGATCGTCTTTTTAGGGAAGATAATGACGAATAGCGCTTCGCAGGCGACACGCGCGCCTTTTGAA	GATGGGCGTTGCGCTCCATATTGTCTTACTTCCTTTTTTGAATTACTGCATAGCACAATTGATTCGTACGACGCCGACTTAGATTAGTCGGCTTTTTTTTG
SL1344_3569(SL1344_3569)	SdsR(ncRNA0070)	-	3800129	3800206	3800107	3800150	-	1925619	1925622	1925695	1925695	28	396.685	4.82e-61	CDS	sRNA	AACATAATTAAAAGAAAACGAAGATCTCGTCGCGGGATCGTCTTTTTAGGGAAGATAATGACGAATAGCGCTTCGCAGGCGACACGCGCGCCTTTTGAAC	CAACTTTTAGCGCACGGCTCTCTCCCAAGAGCCATTTCCCTGGACCGAATACAGGAATCGTATTCGGTCTCTTTTTA
SL1344_3599(SL1344_3599)	ArcZ(ncRNA0002)	+	3840589	3840619	3840634	3840645	+	3511913	3511919	3511860	3511861	194	1275.2	0	CDS	sRNA	CGCAAAGTTGATTGATGTTGCCCGCCATGCAGGCGTGTCGCCAGGGACAGTATCCAA	ATTTCCCTGGTGTTGGCGCAGTATTCGCGCACCCCGGTCAAACCGGGGTCATTTTTTTTC
SL1344_3613(SL1344_3613)	OmrB(ncRNA0049)	-	3856749	3856790	3856723	3856723	-	3191784	3191787	3191848	3191851	12	90.4466	9.32e-20	5UTR	sRNA	CCGTCAGGCACGCAGGTGTCGTTGTGCGTATTTTTGGGTGAAAGGAGTATTAACAATGGCGACAGGTA	TGGAATCAACGTCATTGTTGATCACACGAATTACACCAACCTGCGTAGAGATGCGCAGGTTTTTTTTT
SL1344_3673(SL1344_3673)	MgrR(ncRNA0043)	-	3923643	3923707	3923622	3923623	+	1550836	1550845	1550792	1550800	22	988.26	9.89e-52	CDS	sRNA	ATCGTTATGAAAAATAGTAAAACCAAAGTGAGTATCATTGTCCCGTTATATAATGCGGGAGCGGATTTTAATGCTTGCATGGCGTC	ACAAATCTATCCATGCAAGCATTTACCGCTGGTGAACCGGCGGTTTTTTTTTGC
SL1344_3686(SL1344_3686)	GcvB(ncRNA0014)	-	3937224	3937283	3937202	3937208	+	3156976	3156986	3156919	3156926	20	129.262	1.19e-31	CDS	sRNA	GGACAATAAGAAAAAATCTGTAATTATAATAATTATGCACTCAGTGAGTAATTTATGAGTGAGACAAGGATAGACAGAATGT	TGTACATTTACCCTGTCTGTCCATAGTGATTAATGTAGCACCGCCATATTGCGGTGCTTTTTTTTGTA
SL1344_3686(SL1344_3686)	MgrR(ncRNA0043)	-	3937253	3937255	3937205	3937205	+	1550836	1550843	1550794	1550798	11	201.281	2.62e-21	CDS	sRNA	ATAATTATGCACTCAGTGAGTAATTTATGAGTGAGACAAGGATAGACAGAA	AAATCTATCCATGCAAGCATTTACCGCTGGTGAACCGGCGGTTTTTTTTT
SL1344_3713(SL1344_3713)	ArcZ(ncRNA0002)	+	3962832	3962882	3962876	3962923	+	3511913	3511918	3511859	3511866	63	1448.14	7.75e-138	CDS	sRNA	TGGGGGCCGGTAGGATCGGGGCTGTTATCCATCCAGGGAACCAGTTTTAACTTTGTCGCCCCGCTGATTATGGGCGGTACCGCGCTGAAAAC	GATTTCCCTGGTGTTGGCGCAGTATTCGCGCACCCCGGTCAAACCGGGGTCATTTTTTTT
SL1344_3713(SL1344_3713).gltS(SL1344_3712).IGR	ArcZ(ncRNA0002)	-	3962576	3962577	--	--	+	3511915	3511919	3511860	3511861	43	4941.42	2.36e-99	IGR	sRNA	CGTTAACGGACATCAGGGACAT	ATTTCCCTGGTGTTGGCGCAGTATTCGCGCACCCCGGTCAAACCGGGGTCATTTTTTTTC
SL1344_3724(SL1344_3724)	ArcZ(ncRNA0002)	-	3979142	3979199	3979120	3979122	+	3511913	3511918	3511859	3511866	107	3075.32	7.6e-242	CDS	sRNA	AAGTCACGCGTGACGAAACACTGTCCGATGCGGTTATCGAGACGGTTTTACCCGATTTTTATGTCTATCCAGGGAAAAGT	GATTTCCCTGGTGTTGGCGCAGTATTCGCGCACCCCGGTCAAACCGGGGTCATTTTTTTT
SL1344_3727(SL1344_3727)	ArcZ(ncRNA0002)	-	3982229	3982288	3982240	3982244	+	3511913	3511918	3511858	3511862	27	193.901	6.61e-48	CDS	sRNA	AATTTAGGGCTGACGGGTTATCAGTCTTTACCTCCGGGGATTGCGAAAA	CGATTTCCCTGGTGTTGGCGCAGTATTCGCGCACCCCGGTCAAACCGGGGTCATTTTTTTT
SL1344_3812(SL1344_3812)	ArcZ(ncRNA0002)	+	4072933	4072980	--	--	+	3511915	3511918	3511860	3511861	20	153.199	2.27e-34	CDS	sRNA	GGTGTTTGAAGATGATATAGCCAGTATTTCATCTCTTATTATCATTTTTTTAGAAAGCCCAGGATCAT	ATTTCCCTGGTGTTGGCGCAGTATTCGCGCACCCCGGTCAAACCGGGGTCATTTTTTTT
SL1344_3812(SL1344_3812)	RprA(ncRNA0058)	+	4072795	4072828	4072843	4072853	-	1401683	1401687	1401727	1401732	22	5177.12	1.23e-69	CDS	sRNA	ACGTGCACCAATTCCCCCCAGTTTTAGGGATAGACTACTCACTTACACAGCAAAAAATG	GAATTGCTGTGTGTAGTCTTTGCCCGTCTCCTACGATGGGCTTTTTTTTT
SL1344_3878(SL1344_3878).rffE(SL1344_3879).IGR	ArcZ(ncRNA0002)	+	4150768	4150777	4150814	4150821	+	3511914	3511920	3511860	3511863	73	34.2468	3.86e-81	IGR	sRNA	GCACGATTTAGCAACACCTCTGCAGTAGGGGGCTGGGCCCCTACTGTCTATTCG	ATTTCCCTGGTGTTGGCGCAGTATTCGCGCACCCCGGTCAAACCGGGGTCATTTTTTTTCC
SL1344_3900(SL1344_3900)	InvR(ncRNA0023)	+	4173719	4173721	4173751	4173764	+	3067550	3067587	3067505	3067517	14	5.50865	8.6e-07	CDS	sRNA	GATAAGAACGATCGCGCAACGGGAGATGGCCCGTCCCAGGTCAATT	TTTACGGTTGGCCATTTGTCTCTTACGTTGCATTTATCAATCTGCTTTTTGATACAGCAGCACCTCGCTGCTGCTTTTTTTAT
SL1344_3907(SL1344_3907).AS	ArcZ(ncRNA0002)	+	4180999	4181005	--	--	+	3511913	3511917	3511860	3511863	43	4941.42	2.36e-99	Antisense	sRNA	TTACTTTCCAAAATCCAGGGAAACCAT	ATTTCCCTGGTGTTGGCGCAGTATTCGCGCACCCCGGTCAAACCGGGGTCATTTTTTT
SL1344_3916(SL1344_3916)	ArcZ(ncRNA0002)	+	4188391	4188432	4188466	4188466	+	3511916	3511917	3511861	3511861	14	60.699	6.5e-20	CDS	sRNA	AATTTATCCAGCGGAAATCGCTTTGCTTAGAGGTTAAATTTTATTATGTATCAGGTTGTTGCGTCTGATTTAGATG	TTTCCCTGGTGTTGGCGCAGTATTCGCGCACCCCGGTCAAACCGGGGTCATTTTTTT
SL1344_3916(SL1344_3916)	STnc2170(ncRNA0289)	+	4188393	4188429	4188429	4188478	-	1553669	1553677	1553707	1553708	12	19660.1	2.55e-47	CDS	sRNA	TTTATCCAGCGGAAATCGCTTTGCTTAGAGGTTAAATTTTATTATGTATCAGGTTGTTGCGTCTGATTTAGATGGCACGCTGCTCT	CCTTTAACCTCTTTGCCCCGTTTTGCGGGGCATTTTTTTA
SL1344_3974(SL1344_3974)	InvR(ncRNA0023)	+	4259599	4259627	4259648	4259659	+	3067533	3067586	3067504	3067506	11	81.6179	3.08e-15	5UTR	sRNA	AATACCGAAAACTCAAACAAGCCGCAGAACAAGAAGAAGCTGACCAACCATGATTGCATTA	TTTTACGGTTGGCCATTTGTCTCTTACGTTGCATTTATCAATCTGCTTTTTGATACAGCAGCACCTCGCTGCTGCTTTTTTTA
SL1344_3984(SL1344_3984)	RybD(ncRNA0062)	-	4269319	4269364	--	--	+	807429	807432	807383	807394	14	147.862	1.6e-25	5UTR	sRNA	TTTATCCAATTCTGAACCTTTGCGGGCCCGTCCGCAAAGAAAAATAACAACCACTCCCTGAGCGTT	AAATGTCCGTTTTCGACATGGTTGGCCACCTTTACGGTGGCCTTTTTTAT
SL1344_4016(SL1344_4016)	FnrS(ncRNA0013)	+	4300292	4300337	4300362	4300365	-	1706782	1706785	1706826	1706835	14	13.96	1.28e-11	CDS	sRNA	GCGCATTCCATGGCGTGGAGGCTTTTCCCGCCGATTATTTAACGACTTTGGATCGTATGAATCATTTCGATTTG	GCATAGCACAATTGATTCGTACGACGCCGACTTAGATTAGTCGGCTTTTTTTTG
SL1344_4020(SL1344_4020)	ArcZ(ncRNA0002)	-	4301932	4301993	4301911	4301911	+	3511915	3511919	3511860	3511862	20	919.194	2.83e-43	CDS	sRNA	TTTGGCGATAATGGCCCTAAATACTTAATCCGTGGGCCGGGCTGCGATATGGGCGTCGTCATACTACAACCAGGGCAGTCATT	ATTTCCCTGGTGTTGGCGCAGTATTCGCGCACCCCGGTCAAACCGGGGTCATTTTTTTTC
SL1344_4029(SL1344_4029)	ArcZ(ncRNA0002)	+	4311564	4311570	--	--	+	3511913	3511919	3511855	3511862	164	2514.85	0	CDS	sRNA	TGTTTAAGGTTGCCGGGGATACTACTT	CCACGATTTCCCTGGTGTTGGCGCAGTATTCGCGCACCCCGGTCAAACCGGGGTCATTTTTTTTC
SL1344_4037(SL1344_4037)	Spf(ncRNA0075)	+	4318494	4318650	4318525	4318719	+	4230566	4230612	4230508	4230542	51	30.0042	9.92e-42	CDS	sRNA	CTATATATTGTGCGCGTTTACGTGAAGCGTCGCCTTGCAATTCAGGAGAGGTAAGATCATGTCTTTAGAAGTGTTTGAGAAACTGGAAGCAAAAGTACAGCAGGCGATTGACACCATCACCCTGTTACAGATGGAAATTGAAGAGCTGAAAGAAAAGAACAACAGCCTGACGCAGGAAGTGCAGTCTGCACAGCATCAGCGTGAAGAACTCGAGCGTGAAAATAAT	GTACAGAGGTAAGATGTTCTATCTTTCAGACCTTTTACTTCACGTAATCGGATTTGGCTGAATATTTTAGCCGCCCCAGTCAGTTTATGACTGGGGCGTTTTTTA
SL1344_4095(SL1344_4095).AS	ArcZ(ncRNA0002)	+	4395993	4396028	4396051	4396054	+	3511913	3511917	3511860	3511861	13	426.749	1.43e-26	Antisense	sRNA	TTATATGAATAAATTGTCCAGTTTTTGTATTATATTTTGCCATCGCACAGGGAAGACTATTA	ATTTCCCTGGTGTTGGCGCAGTATTCGCGCACCCCGGTCAAACCGGGGTCATTTTTTT
SL1344_4127(SL1344_4127)	InvR(ncRNA0023)	+	4436102	4436161	4436184	4436200	+	3067546	3067586	3067504	3067520	75	299.675	4.89e-115	CDS	sRNA	GGCCAGATCTGCCATCTGGTATCGCCTGAAAAATTACAGGTATAATCCGCAAAATTATTTAACACGTTTAGAGACGAAAATGGCAAAACTGACCTTACA	TTTTACGGTTGGCCATTTGTCTCTTACGTTGCATTTATCAATCTGCTTTTTGATACAGCAGCACCTCGCTGCTGCTTTTTTTA
SL1344_4130(SL1344_4130)	STnc870(ncRNA0205)	-	4438936	4439007	4438891	4438951	+	4292596	4292599	4292535	4292542	27	1869.4	3.73e-73	CDS	sRNA	CTATGGTCTGGCTCGATCCTGACCCGTTGATAACAAACACAACATACTTGCAAGGAAAACAACATGCTCGCCGTCATTACCCGGCTGTTCCCGTTATGGGCGCTGCTGCTCTCTCTC	ACCCTGTTTTCCTTGCCATAGACACCATCCCTGTCTTCCCCCACATGATGTGGGGGTTTTTTTTA
SL1344_4132(SL1344_4132).SL1344_4131(SL1344_4131).IGR	ArcZ(ncRNA0002)	-	4439956	4439969	4439932	4439934	+	3511914	3511918	3511860	3511861	10	2.29783e+06	2.33e-24	IGR	sRNA	TGGCTAAAATCACCTAATATTCACCGGGGAATATAATG	ATTTCCCTGGTGTTGGCGCAGTATTCGCGCACCCCGGTCAAACCGGGGTCATTTTTTTT
SL1344_4187(SL1344_4187)	ArcZ(ncRNA0002)	+	4493512	4493584	4493627	4493630	+	3511914	3511918	3511860	3511862	13	157.223	6.11e-23	3UTR	sRNA	ATTATCTGGTCGATGCCTCTTATCAACAGGCGGTAAATGCGCTGTCGGAAGATAAACGCAAGCAGTTGCCGCAGTCCTGATTATAGCGCGCCGACCAACAACGCCAGGGCGATATCAAT	ATTTCCCTGGTGTTGGCGCAGTATTCGCGCACCCCGGTCAAACCGGGGTCATTTTTTTT
SL1344_4239(SL1344_4239)	GcvB(ncRNA0014)	-	4570125	4570212	4570072	4570141	+	3156913	3156986	3156845	3156935	88	16.3573	1.04e-70	CDS	sRNA	CGGAATTTTCCTGACACTTAAATAAAATTATGTTTGTAGCAATGGAGCTTGTGCTACGCCTATGGACAATACGTATATTGGTGAGCAGATACGCGTCTCCACACGCCATACTAATAATTTAAAAAAATGGCGTGACAATGA	TGATGTTGTGTTGTTGTGTTTGCAATTGGTCTGCGATTCAGACCACGGTAGCGAGACTACCCTTTTTCACTTCCTGTACATTTACCCTGTCTGTCCATAGTGATTAATGTAGCACCGCCATATTGCGGTGCTTTTTTTTGTA
SL1344_4239(SL1344_4239)	GcvB(ncRNA0014)	-	4570213	4570230	--	--	+	3156981	3156985	3156922	3156935	10	27.0539	2.82e-11	5UTR	sRNA	TTAAAAAAGGGATTTGTCCGGAATTTTCCTGACACTTA	ACATTTACCCTGTCTGTCCATAGTGATTAATGTAGCACCGCCATATTGCGGTGCTTTTTTTTGT
SL1344_4239(SL1344_4239)	SL1344_3664(SL1344_3664)	-	4570164	4570205	4570137	4570140	+	3915414	3915416	3915348	3915349	14	305.844	2.37e-30	CDS	3UTR	TTCCTGACACTTAAATAAAATTATGTTTGTAGCAATGGAGCTTGTGCTACGCCTATGGACAATACGTAT	ATTGTCCACATTGCGAATTCTTCGCTCCGCTGTTCCGGGATTGCACTCCATCGGAACAGCGTTTTTTAG
SL1344_4239(SL1344_4239)	STnc440(ncRNA0162)	-	4570138	4570212	4570072	4570111	+	4580542	4580566	4580492	4580519	14	60.3002	1.42e-20	CDS	sRNA	CGGAATTTTCCTGACACTTAAATAAAATTATGTTTGTAGCAATGGAGCTTGTGCTACGCCTATGGACAATACGTATATTGGTGAGCAGATACGCGTCTCCACACGCCATACTAATAATTTAAAAAAATGGCGTGACAATGA	ATTACTTTGTGGTGTAGCGTAACGGTAATTGTCCTCCTCATATTTGCGGCAGCGTAGTCTGCCGCTTTTTTTTAT
SL1344_4245(SL1344_4245)	ArcZ(ncRNA0002)	+	4577252	4577287	4577307	4577307	+	3511913	3511918	3511860	3511861	16	75.0342	8.19e-24	CDS	sRNA	TGATGATGCGCTTACATGGCAATTTTCCGTATTGTTTGAAGGCCAGGGAAAGATGC	ATTTCCCTGGTGTTGGCGCAGTATTCGCGCACCCCGGTCAAACCGGGGTCATTTTTTTT
SL1344_4246(SL1344_4246).AS	ArcZ(ncRNA0002)	+	4577751	4577786	4577809	4577814	+	3511914	3511918	3511860	3511861	37	386.522	2.97e-72	Antisense	sRNA	GTTTACTATTACAGCTCCGGCGTCTTTTTGAAACCGGTCAGCATCAGCACCAGGCTCTGTTTTG	ATTTCCCTGGTGTTGGCGCAGTATTCGCGCACCCCGGTCAAACCGGGGTCATTTTTTTT
SL1344_4251(SL1344_4251)	ArcZ(ncRNA0002)	-	4582115	4582187	4582140	4582140	+	3511914	3511919	3511859	3511863	41	314.101	1.08e-77	CDS	sRNA	AATTACGACATCGTCCGGGGAGTATATTACGGCATCAGGGCCAATGTT	GATTTCCCTGGTGTTGGCGCAGTATTCGCGCACCCCGGTCAAACCGGGGTCATTTTTTTTC
SL1344_4251(SL1344_4251)	RprA(ncRNA0058)	-	4582370	4582409	4582321	4582353	-	1401682	1401687	1401731	1401732	30	2097.99	1e-85	CDS	sRNA	ATATTAGTTTTCTTTTGAAATATTTTTCAGAATAATTTTGATTTACACGCACATTTAATAAAAGGAAATTATCATGCTAAAAGTATTTA	GAATTGCTGTGTGTAGTCTTTGCCCGTCTCCTACGATGGGCTTTTTTTTTA
SL1344_4264(SL1344_4264)	ArcZ(ncRNA0002)	+	4593410	4593440	4593458	4593467	+	3511913	3511918	3511860	3511862	23	135.525	2.25e-38	CDS	sRNA	ATTTTTACGTCTGTTATCGGTATGTCGCTGGTACGTAACCAGGGTTTTAAAAACTTTT	ATTTCCCTGGTGTTGGCGCAGTATTCGCGCACCCCGGTCAAACCGGGGTCATTTTTTTT
SL1344_4264(SL1344_4264).aspA(SL1344_4263).IGR	Spf(ncRNA0075)	-	4593122	4593123	--	--	+	4230570	4230612	4230536	4230541	10	103.668	7.22e-15	IGR	sRNA	ACTTTAAGTGATCCAGATTACG	GACCTTTTACTTCACGTAATCGGATTTGGCTGAATATTTTAGCCGCCCCAGTCAGTTTATGACTGGGGCGTTTTTTA
SL1344_4288(SL1344_4288)	ArcZ(ncRNA0002)	-	4616747	4616792	4616723	4616726	+	3511882	3511919	3511859	3511879	435	976.193	0	5UTR	sRNA	AATAGCACCCTGCGCCAAAAAAAGAATAGCACGGTGACCACAACATCCAATTGATATCAGGGATCAAGAT	GATTTCCCTGGTGTTGGCGCAGTATTCGCGCACCCCGGTCAAACCGGGGTCATTTTTTTTC
SL1344_4288(SL1344_4288)	GcvB(ncRNA0014)	-	4616720	4616790	4616664	4616741	+	3156913	3156985	3156800	3156845	33	8.08251	7.8e-19	CDS	sRNA	TAGCACCCTGCGCCAAAAAAAGAATAGCACGGTGACCACAACATCCAATTGATATCAGGGATCAAGATGAAAAAAAAACTTATTGTCATGCTGTTAGCCAGCCTCTCCGTTCACGCCGCTTCCGTTT	GTTTTATCGGAATGCGTGTTCTGATGGGCTTTTGGCTTACGGTTGTGATGTTGTGTTGTTGTGTTTGCAATTGGTCTGCGATTCAGACCACGGTAGCGAGACTACCCTTTTTCACTTCCTGTACATTTACCCTGTCTGTCCATAGTGATTAATGTAGCACCGCCATATTGCGGTGCTTTTTTTTGT
SL1344_4290(SL1344_4290).AS	ArcZ(ncRNA0002)	-	4620464	4620486	4620434	4620435	+	3511915	3511917	3511860	3511861	11	2.52763e+06	1.01e-26	Antisense	sRNA	CGGAATTACTCGATTCATCATGGTTTACGTCAATCACATCAGGGTTAACAATA	ATTTCCCTGGTGTTGGCGCAGTATTCGCGCACCCCGGTCAAACCGGGGTCATTTTTTT
SL1344_4328(SL1344_4328)	ArcZ(ncRNA0002)	+	4652672	4652684	4652703	4652710	+	3511915	3511919	3511860	3511862	89	1573.95	4.1e-195	CDS	sRNA	GTGAAAGAATGGATACCCAACGCCAGGCCTCCCCGTTTG	ATTTCCCTGGTGTTGGCGCAGTATTCGCGCACCCCGGTCAAACCGGGGTCATTTTTTTTC
SL1344_4339(SL1344_4339)	FnrS(ncRNA0013)	+	4664091	4664185	4664177	4664237	-	1706782	1706787	1706833	1706859	52	5.83711	1.67e-22	CDS	sRNA	AAGTGAGAGACAAGCAGCACTTGTCTGTGATGTCTGAAGTTAACCGTCAGGTTATGCGTCTGCAAACTGAGATGGCGTAACCAAAAGTGCTATGCAGTAGGTTAAAAAAGTAAAAAAAAACGGCTCCTGAATCAGGAGCCGTTGATG	TCTTACTTCCTTTTTTGAATTACTGCATAGCACAATTGATTCGTACGACGCCGACTTAGATTAGTCGGCTTTTTTTTG
SL1344_4339(SL1344_4339)	STnc440(ncRNA0162)	+	4663889	4663973	4663967	4663999	+	4580529	4580567	4580489	4580521	99	564.14	1.29e-227	CDS	sRNA	CATTAAAATTTGCGCCTTAAAACTGTTGGGCCGATTGTGGCATCGCAAGGGCGTAATACTCTGCAGGAGACAACAATGAAAATTTTCCAACGCTACAACCCGCTACAGGTG	CGGATTACTTTGTGGTGTAGCGTAACGGTAATTGTCCTCCTCATATTTGCGGCAGCGTAGTCTGCCGCTTTTTTTTATA
SL1344_4344(SL1344_4344)	STnc1920(ncRNA0276)	+	4672093	4672130	4672152	4672156	+	2756643	2756647	2756586	2756588	25	13464.6	3.68e-91	5UTR	sRNA	GTCTGGCGTAGATCAGGCACTTGATTTGCTCTATCAGTTTGAGTTTTAGCAATGCGAATATTTG	TTTATGCATTTCTGAAACTCCCCCGCAGGTAAGCTCCTTTTCCCTCCTGCGGGAATTTTTTA
SL1344_4426(SL1344_4426).SL1344_4425(SL1344_4425).IGR	RprA(ncRNA0058)	-	4771224	4771232	--	--	-	1401683	1401687	1401731	1401733	27	8053.21	2.77e-88	IGR	sRNA	GAATCCTCGTTAAAGAGCACAGCAATGAA	CGAATTGCTGTGTGTAGTCTTTGCCCGTCTCCTACGATGGGCTTTTTTTTT
SL1344_4445A(SL1344_4445A).SL1344_4445(SL1344_4445).IGR	ArcZ(ncRNA0002)	-	4789227	4789306	4789201	4789211	+	3511914	3511919	3511859	3511869	59	968.685	1.29e-125	IGR	sRNA	TATTTTTTAACAACGATAATTAAGTGGCGTGAAATTGACTAACGTCAAATTTATTTCTCCTTTTTTCCTGCTCCCAGCTCCGGCCTGCGTCAACACCTGTTTCTTT	GATTTCCCTGGTGTTGGCGCAGTATTCGCGCACCCCGGTCAAACCGGGGTCATTTTTTTTC
SL1344_4448(SL1344_4448)	ArcZ(ncRNA0002)	-	4793166	4793212	4793132	4793175	+	3511913	3511918	3511859	3511865	100	147.384	2.93e-164	CDS	sRNA	GATTTTTCTCACCGGGGCGGCGACGCTGTCGTTGAGCTACATCCCGATGATGAGCTGGGTGGCGGTGTCGCCGGTGATCCT	GATTTCCCTGGTGTTGGCGCAGTATTCGCGCACCCCGGTCAAACCGGGGTCATTTTTTTT
SL1344_4453(SL1344_4453).AS	ArcZ(ncRNA0002)	+	4796976	4796983	4797007	4797007	+	3511915	3511918	3511859	3511862	33	329.739	2.97e-63	Antisense	sRNA	CTTTTTTGTTAAATATGCCAGGGATGATAATC	GATTTCCCTGGTGTTGGCGCAGTATTCGCGCACCCCGGTCAAACCGGGGTCATTTTTTTT
SL1344_4511(SL1344_4511)	ArcZ(ncRNA0002)	-	4862558	4862577	4862518	4862537	+	3511913	3511918	3511860	3511863	21	804.3	6.81e-45	CDS	sRNA	TAAATTTTTAAAACTGAGCTTAATTATGCACCAGGTTATCTCTGCGACCACCAATCCTGC	ATTTCCCTGGTGTTGGCGCAGTATTCGCGCACCCCGGTCAAACCGGGGTCATTTTTTTT
SL1344_rRNA0002(SL1344_rRNA0002).SL1344_rRNA0003(SL1344_rRNA0003).IGR	StyR-44a(ncRNA0420)	+	294398	294478	294435	294510	+	291127	291209	291106	291106	26	263.396	2.47e-53	IGR	sRNA	AAGGCGGCAAACGCAGCGACGGAAGGAGCATACAGAAGTATGTGACTGACGCTCGCAAGAGCAGCCAACGCCGTATCAGTGTAAAAGACACAGGACGGAGCACAAAGAATTTG	CTCTTTAAAAATCTGGATCAAGCTGAAAATTGAAACACAGAACAACGAAAGTTGTTCGTGAGTCTCTCAAATTTTCGCAACACGATGATGAATCGTAAGAAACA
SL1344_rRNA0002(SL1344_rRNA0002).SL1344_rRNA0003(SL1344_rRNA0003).IGR	StyR-44b(ncRNA0421)	+	294393	294485	294498	294512	-	2800220	2800280	2800299	2800299	25	254.352	5.66e-51	IGR	sRNA	GAGACAAGGCGGCAAACGCAGCGACGGAAGGAGCATACAGAAGTATGTGACTGACGCTCGCAAGAGCAGCCAACGCCGTATCAGTGTAAAAGACACAGGACGGAGCACAAAGAATTTGCC	ATTTGCTCTTTAAAAATCTGGATCAAGCTGAAAATTGAAACACAGAACAACGAAAGTTGTTCGTGAGTCTCTCAAATTTT
SL1344_rRNA0002(SL1344_rRNA0002).SL1344_rRNA0003(SL1344_rRNA0003).IGR	StyR-44c(ncRNA0422)	+	294401	294485	294501	294506	-	3591628	3591687	3591715	3591715	24	154.339	7.23e-44	IGR	sRNA	GCGGCAAACGCAGCGACGGAAGGAGCATACAGAAGTATGTGACTGACGCTCGCAAGAGCAGCCAACGCCGTATCAGTGTAAAAGACACAGGACGGAGCACAAAGAA	ATTTGCTCTTTAAAAATCTGGATCAAGCTGAAAATTGAAACACAGAACAACGAAAGTTGTTCGTGAGTCTCTCAAATTTTCGCAACAC
SL1344_rRNA0002(SL1344_rRNA0002).SL1344_rRNA0003(SL1344_rRNA0003).IGR	StyR-44d(ncRNA0423)	+	294404	294472	294490	294505	+	4123237	4123299	4123212	4123212	16	184.423	5.45e-31	IGR	sRNA	GCAAACGCAGCGACGGAAGGAGCATACAGAAGTATGTGACTGACGCTCGCAAGAGCAGCCAACGCCGTATCAGTGTAAAAGACACAGGACGGAGCACAAAGA	TTTGCTCTTTAAAAATCTGGATCAAGCTGAAAATTGAAACACAGAACAACGAAAGTTGTTCGTGAGTCTCTCAAATTTTCGCAACACG
SL1344_rRNA0002(SL1344_rRNA0002).SL1344_rRNA0003(SL1344_rRNA0003).IGR	StyR-44e(ncRNA0424)	+	294394	294478	294498	294512	+	4219557	4219585	4219538	4219538	19	447.323	1.07e-43	IGR	sRNA	AGACAAGGCGGCAAACGCAGCGACGGAAGGAGCATACAGAAGTATGTGACTGACGCTCGCAAGAGCAGCCAACGCCGTATCAGTGTAAAAGACACAGGACGGAGCACAAAGAATTTGCC	TTTGCTCTTTAAAAATCTGGATCAAGCTGAAAATTGAAACACAGAACA
SL1344_rRNA0002(SL1344_rRNA0002).SL1344_rRNA0003(SL1344_rRNA0003).IGR	StyR-44f(ncRNA0425)	+	294404	294478	294488	294510	+	4374528	4374581	4374502	4374502	17	205.93	1.24e-33	IGR	sRNA	GCAAACGCAGCGACGGAAGGAGCATACAGAAGTATGTGACTGACGCTCGCAAGAGCAGCCAACGCCGTATCAGTGTAAAAGACACAGGACGGAGCACAAAGAATTTG	TTTGCTCTTTAAAAATCTGGATCAAGCTGAAAATTGAAACACAGAACAACGAAAGTTGTTCGTGAGTCTCTCAAATTTTC
SL1344_rRNA0005(SL1344_rRNA0005).SL1344_rRNA0004(SL1344_rRNA0004).IGR	StyR-44d(ncRNA0423)	-	2797016	2797085	2796981	2796981	+	4123241	4123281	--	--	10	167.303	1.65e-19	IGR	sRNA	AGGCAAGGCGGCAAATGAAGGAAAGGAAGGAGCATACAGAAGTATGTGACTGACTTTACGAATGCAGCCAACGCAGCATCGGTGTAAAAGATTCGTTTCTGGCAA	TAAAAATCTGGATCAAGCTGAAAATTGAAACACAGAACAACGAAAGTTGTTCGTGAGTCTC
SL1344_rRNA0005(SL1344_rRNA0005).SL1344_rRNA0004(SL1344_rRNA0004).IGR	StyR-44e(ncRNA0424)	-	2797013	2797066	2796971	2796976	+	4219571	4219611	--	--	10	337.066	1.63e-22	IGR	sRNA	GGAAAGGAAGGAGCATACAGAAGTATGTGACTGACTTTACGAATGCAGCCAACGCAGCATCGGTGTAAAAGATTCGTTTCTGGCAACAGAATTTGC	AATCTGGATCAAGCTGAAAATTGAAACACAGAACAACGAAAGTTGTTCGTGAGTCTCTCAA
SL1344_rRNA0012(SL1344_rRNA0012).SL1344_rRNA0013(SL1344_rRNA0013).IGR	StyR-44b(ncRNA0421)	+	4126410	4126479	4126511	4126521	-	2800188	2800280	--	--	20	194.169	8.67e-39	IGR	sRNA	GCGGCAAACGCAGCGACGGAAGGAGCATACAGAAGTATGTGACTGACGCTCGCAAGAGCAGCCAACGCCGTATCAGTGTAAAAGACACAGGACGGAGCACAAAGAATTTGCC	TATTTGCTCTTTAAAAATCTGGATCAAGCTGAAAATTGAAACACAGAACAACGAAAGTTGTTCGTGAGTCTCTCAAATTTTCGCAGCACGATGATGAATCGTAAGAAACATCT
SL1344_rRNA0012(SL1344_rRNA0012).SL1344_rRNA0013(SL1344_rRNA0013).IGR	StyR-44c(ncRNA0422)	+	4126400	4126481	4126514	4126521	-	3591634	3591684	--	--	10	60.9837	3.5e-15	IGR	sRNA	CTGAGACAAGGCGGCAAACGCAGCGACGGAAGGAGCATACAGAAGTATGTGACTGACGCTCGCAAGAGCAGCCAACGCCGTATCAGTGTAAAAGACACAGGACGGAGCACAAAGAATTTGCC	AAAAATCTGGATCAAGCTGAAAATTGAAACACAGAACAACGAAAGTTGTTCGTGAGTCTCTCAAATTTTCG
SL1344_rRNA0012(SL1344_rRNA0012).SL1344_rRNA0013(SL1344_rRNA0013).IGR	StyR-44d(ncRNA0423)	+	4126410	4126474	4126499	4126521	+	4123238	4123299	4123212	4123212	15	165.79	1.84e-28	IGR	sRNA	GCGGCAAACGCAGCGACGGAAGGAGCATACAGAAGTATGTGACTGACGCTCGCAAGAGCAGCCAACGCCGTATCAGTGTAAAAGACACAGGACGGAGCACAAAGAATTTGCC	TTTGCTCTTTAAAAATCTGGATCAAGCTGAAAATTGAAACACAGAACAACGAAAGTTGTTCGTGAGTCTCTCAAATTTTCGCAACACG
SL1344_rRNA0012(SL1344_rRNA0012).SL1344_rRNA0013(SL1344_rRNA0013).IGR	StyR-44e(ncRNA0424)	+	4126408	4126480	4126508	4126521	+	4219558	4219610	4219538	4219538	23	525.035	4.11e-54	IGR	sRNA	AGGCGGCAAACGCAGCGACGGAAGGAGCATACAGAAGTATGTGACTGACGCTCGCAAGAGCAGCCAACGCCGTATCAGTGTAAAAGACACAGGACGGAGCACAAAGAATTTGCC	TTTGCTCTTTAAAAATCTGGATCAAGCTGAAAATTGAAACACAGAACAACGAAAGTTGTTCGTGAGTCTCTCA
SL1344_rRNA0012(SL1344_rRNA0012).SL1344_rRNA0013(SL1344_rRNA0013).IGR	StyR-44f(ncRNA0425)	+	4126414	4126482	4126503	4126521	+	4374521	4374582	4374502	4374502	12	138.601	3.81e-22	IGR	sRNA	CAAACGCAGCGACGGAAGGAGCATACAGAAGTATGTGACTGACGCTCGCAAGAGCAGCCAACGCCGTATCAGTGTAAAAGACACAGGACGGAGCACAAAGAATTTGCC	TTTGCTCTTTAAAAATCTGGATCAAGCTGAAAATTGAAACACAGAACAACGAAAGTTGTTCGTGAGTCTCTCAAATTTTCG
SLnc1026(ncRNA0406)	InvR(ncRNA0023)	+	3671400	3671463	3671485	3671486	+	3067549	3067587	3067518	3067527	19	29.9044	7.45e-20	sRNA	sRNA	TGTAATCTGTGGTCATTGTGCGACATACCGCACGGTTTCGGCAATGCGAATTGCCGTTTATTTACATTTATGTAACGTAATAAAAAT	ATTTGTCTCTTACGTTGCATTTATCAATCTGCTTTTTGATACAGCAGCACCTCGCTGCTGCTTTTTTTAT
slt(SL1344_4509)	MgrR(ncRNA0043)	+	4859592	4859641	4859626	4859632	+	1550821	1550844	1550786	1550796	51	840.365	4.91e-116	CDS	sRNA	GATAACAATTGAGGAAGTGCTTGTGGATAGAGCCAAACCAT	CAAAACACAAATCTATCCATGCAAGCATTTACCGCTGGTGAACCGGCGGTTTTTTTTTG
slyA(SL1344_1376)	CyaR(ncRNA0009)	+	1476690	1476753	1476772	1476781	+	2228920	2228932	2228862	2228864	18	16.5519	4.5e-16	CDS	sRNA	CTAAAATCAGCATAATAACTTAGCAAGCTAATTATAAGGAGATGAAATTGGAATCGCCACTAGGTTCTGATCTGGCACGGTTGGTGCGCATT	CATAAATGCTAGCTGTACCAGGAACCACCTCCTTGGCCTGCGTAATCTCCCTTACGCAGGCTTATTTTTTG
slyA(SL1344_1376)	STnc870(ncRNA0205)	+	1476539	1476615	1476644	1476648	+	4292564	4292598	4292541	4292542	46	1769.63	1.19e-80	5UTR	sRNA	GCAATGTTCCTTTGCGTCAGACATCGATGCTTTAGTTTTAGCCAAAACTGAAGCTACAGGTGCCAAGTGCGCACTATGTCTGAAAAAATGTCTATTGGTAAGCAAATTTA	TTTTCCTTGCCATAGACACCATCCCTGTCTTCCCCCACATGATGTGGGGGTTTTTTTT
slyB(SL1344_1377)	STnc870(ncRNA0205)	-	1477713	1477744	1477683	1477693	+	4292596	4292599	4292550	4292560	57	3787.23	6.64e-163	5UTR	sRNA	TATAATTTAGCTATAGGGATGCTGAAATAGCGTTTCGTGAAGAACAGGAGATGGGTAAATGA	CCATAGACACCATCCCTGTCTTCCCCCACATGATGTGGGGGTTTTTTTTA
sodB(SL1344_1363)	ArcZ(ncRNA0002)	-	1466862	1466908	--	--	+	3511913	3511917	3511860	3511863	17	17.0588	1.85e-15	5UTR	sRNA	CCCTATCCTTACGCGCACCAGGGGTATTGTGCGTGCGCAATATTAATAATAAGGAGAGAAGCAATGT	ATTTCCCTGGTGTTGGCGCAGTATTCGCGCACCCCGGTCAAACCGGGGTCATTTTTTT
sodB(SL1344_1363)	STnc440(ncRNA0162)	-	1466856	1466868	1466809	1466829	+	4580532	4580566	4580496	4580497	17	223.882	4.69e-34	CDS	sRNA	TATTAATAATAAGGAGAGAAGCAATGTCGTTCGAATTACCTGCATTACCGTATGCCAAAG	CTTTGTGGTGTAGCGTAACGGTAATTGTCCTCCTCATATTTGCGGCAGCGTAGTCTGCCGCTTTTTTTTAT
solA(SL1344_1097)	ArcZ(ncRNA0002)	-	1203650	1203667	1203550	1203599	+	3511915	3511918	3511859	3511863	17	31.0038	1.82e-19	CDS	sRNA	CTTATTATTATCGGCAGCGGTTCGGTTGGCGCCGCCGCTGGTTATTACGCCACCCGCGCCGGGCTAAAGGTCCTGATGACCGATGCGCATATGCCGCCTCATCAACAGGGCAGCCACC	GATTTCCCTGGTGTTGGCGCAGTATTCGCGCACCCCGGTCAAACCGGGGTCATTTTTTTT
sopA(SL1344_2043)	ArcZ(ncRNA0002)	+	2139311	2139320	--	--	+	3511915	3511918	3511860	3511863	24	1378.83	3.86e-53	CDS	sRNA	TTTTCTACTATTCCTAACCAGGTTAAAAAA	ATTTCCCTGGTGTTGGCGCAGTATTCGCGCACCCCGGTCAAACCGGGGTCATTTTTTTT
spaO(SL1344_2870)	InvR(ncRNA0023)	-	3057113	3057122	3056971	3057086	+	3067546	3067586	3067503	3067520	28	29.68	1.72e-28	CDS	sRNA	CTGGAATTTGTTTTGTATCGTAAGAACGTTACCCTCGCCGAACTCGAAGCCATGGGGCAGCAACAGCTATTATCACTGCCGACCAATGCTGAACTTAACGTTGAAATTATGGCGAATGGTGTTTTGCTGGGTAATGGCGAACTGGTACAGAT	CTTTTACGGTTGGCCATTTGTCTCTTACGTTGCATTTATCAATCTGCTTTTTGATACAGCAGCACCTCGCTGCTGCTTTTTTTA
spaT(SL1344_2865)	ArcZ(ncRNA0002)	-	3053613	3053859	3053587	3053820	+	3511913	3511919	3511859	3511863	413	875.96	0	CDS	sRNA	GACGGTTTATATGCTCATGCTTATGAGTTTTATAACCAGGGACGACTGGATGAAGCTGAGACGTTCTTTCGTTTCTTATGCATTTATGATTTTTACAATCCCGATTACACCATGGGACTGGCGGCAGTATGCCAACTGAAAAAACAATTTCAGAAAGCATGTGACCTTTATGCAGTAGCGTTTACGTTACTTAAAAATGATTATCGCCCCGTTTTTTTTACCGGGCAGTGTCAATTATTAATGCGTAAGGCAGCAAAAGCCAGACAGTGTTTT	GATTTCCCTGGTGTTGGCGCAGTATTCGCGCACCCCGGTCAAACCGGGGTCATTTTTTTTC
speG(SL1344_1432)	ArcZ(ncRNA0002)	-	1537827	1537889	1537799	1537831	+	3511913	3511918	3511859	3511862	22	280.868	1.08e-41	CDS	sRNA	CATGTGCATCGGCGGGCGGAATTTCAGATTATTATCTCGCCGGAGTACCAGGGAAAAGGCCTGGCGTCACGCGCGGCCAAACTGGCGATGG	GATTTCCCTGGTGTTGGCGCAGTATTCGCGCACCCCGGTCAAACCGGGGTCATTTTTTTT
SraC(ncRNA0078)	ArcZ(ncRNA0002)	+	1925618	1925736	1925665	1925761	+	3511913	3511919	3511859	3511863	23	114.892	6.48e-17	sRNA	sRNA	ATAAAAAGAGACCGAATACGATTCCTGTATTCGGTCCAGGGAAATGGCTCTTGGGAGAGAGCCGTGCGCTAAAAGTTGGCATTAATGCAGGCTAAATCGCCTTGCCCTTTAAGAATAGATGACGACGCCAGGTTTTCCAGTTTG	GATTTCCCTGGTGTTGGCGCAGTATTCGCGCACCCCGGTCAAACCGGGGTCATTTTTTTTC
sRNA2(ncRNA0108)	ArcZ(ncRNA0002)	+	2311300	2311346	2311364	2311369	+	3511913	3511918	3511860	3511864	139	255.735	1.82e-251	sRNA	sRNA	TAATTAGTCTCATCACGTTTGGCATTTTTATAACGATATTTATCGTTAAGGACTTCAAGGGAAAACAAAC	ATTTCCCTGGTGTTGGCGCAGTATTCGCGCACCCCGGTCAAACCGGGGTCATTTTTTTT
ssb(SL1344_4192)	InvR(ncRNA0023)	+	4497502	4497562	4497577	4497593	+	3067550	3067586	3067501	3067524	23	13.4226	2.06e-17	CDS	sRNA	CTATTAAAATGCTACGTGGAAATGGTACACTCACGCGTTTACACTATTTATGAAACGTATTCAGGAGACTCAATTATGGCCAGCAGAGGCGT	CACTTTTACGGTTGGCCATTTGTCTCTTACGTTGCATTTATCAATCTGCTTTTTGATACAGCAGCACCTCGCTGCTGCTTTTTTTA
sseD(SL1344_1335).AS	ArcZ(ncRNA0002)	-	1443734	1443779	1443692	1443718	+	3511915	3511918	3511859	3511867	91	129.946	8.68e-146	Antisense	sRNA	GGCCCCATTTTGTTGCAGGTCGGCAATCGCTTTATCTTGATCACTTTGACGTTGCGCTACACCAGCCCCCAGGCCCATGACGCCCCCA	GATTTCCCTGGTGTTGGCGCAGTATTCGCGCACCCCGGTCAAACCGGGGTCATTTTTTTT
sseD(SL1344_1335).AS	RprA(ncRNA0058)	-	1443732	1443777	1443702	1443706	-	1401682	1401686	1401730	1401732	17	323.237	9.24e-37	Antisense	sRNA	CCCCATTTTGTTGCAGGTCGGCAATCGCTTTATCTTGATCACTTTGACGTTGCGCTACACCAGCCCCCAGGCCCAT	GAATTGCTGTGTGTAGTCTTTGCCCGTCTCCTACGATGGGCTTTTTTTTTA
SsrS(ncRNA0087).SL1344_3037(SL1344_3037).IGR	ArcZ(ncRNA0002)	+	3243051	3243080	3243090	3243112	+	3511913	3511918	3511860	3511865	55	50.9748	4.66e-70	IGR	sRNA	CGACAAGAAATCCGCCGGATGATTCGGCAACGTCGCCGTGCGCTAACGCCAGAGCAGCAACG	ATTTCCCTGGTGTTGGCGCAGTATTCGCGCACCCCGGTCAAACCGGGGTCATTTTTTTT
STnc1080(ncRNA0219)	ArcZ(ncRNA0002)	-	1062770	1062806	1062742	1062754	+	3511913	3511918	3511860	3511868	53	8.73224	4.37e-31	sRNA	sRNA	CGCAATTACCTACCGTTTTTGCACCAGAAAGCCGTTGGTGACCCCTCACCGCGGCTTTCGCCTTT	ATTTCCCTGGTGTTGGCGCAGTATTCGCGCACCCCGGTCAAACCGGGGTCATTTTTTTT
STnc1080(ncRNA0219)	STnc440(ncRNA0162)	-	1062769	1062807	1062741	1062745	+	4580521	4580566	4580492	4580498	18	37.9634	1.66e-22	sRNA	sRNA	CCGCAATTACCTACCGTTTTTGCACCAGAAAGCCGTTGGTGACCCCTCACCGCGGCTTTCGCCTTTT	ATTACTTTGTGGTGTAGCGTAACGGTAATTGTCCTCCTCATATTTGCGGCAGCGTAGTCTGCCGCTTTTTTTTAT
STnc1110(ncRNA0222)	CyaR(ncRNA0009)	+	1643514	1643585	1643643	1643649	+	2228925	2228932	2228856	2228867	21	24.6911	8.09e-22	sRNA	sRNA	TGATTAATGTCTTTGCTGCTGCAGGACTTTTGGGTCTGATCTCGTTGAGATTCGGCTGGTTTGCTTGAGGTGTTCAACCTTTGAGTACTTGCTGCGCATGTTGGCGGGGAGGTCCCCCTCTCCGCCAACACCCGCC	ATAACCCATAAATGCTAGCTGTACCAGGAACCACCTCCTTGGCCTGCGTAATCTCCCTTACGCAGGCTTATTTTTTG
STnc1150(ncRNA0224)	FnrS(ncRNA0013)	+	2222980	2222986	2223020	2223022	-	1706782	1706784	1706864	1706864	11	10.7192	2.37e-08	sRNA	sRNA	ATTGGCATAACAATAACAAGGTCGTAAGACGATATTTTCCGCC	TATTGTCTTACTTCCTTTTTTGAATTACTGCATAGCACAATTGATTCGTACGACGCCGACTTAGATTAGTCGGCTTTTTTTTG
STnc1170(ncRNA0226)	ArcZ(ncRNA0002)	-	3312448	3312585	3312419	3312433	+	3511913	3511918	3511809	3511863	169	1416.81	0	sRNA	sRNA	GTGTGTGTTAATTGATGTAAATCAATTTGGATTTTTTTATTAAATAAGTAAAAATTAAGTTGATATTTGCTTTTTGATGTGTTTTTTATATATAGCTGATTATTATTCTGAAATGTCAATTTTTGAATAACGACGCTGTGATACCGGCACCAGGGATACTTTGCGAT	AAAACAGGACTGCGCCTTTGACATCATCATAATAAGCACGGCGCAGCCACGATTTCCCTGGTGTTGGCGCAGTATTCGCGCACCCCGGTCAAACCGGGGTCATTTTTTTT
STnc1390(ncRNA0242)	ArcZ(ncRNA0002)	+	2767702	2767741	2767752	2767769	+	3511913	3511919	3511860	3511867	116	11.7497	4.55e-79	sRNA	sRNA	TGTGAATTGATCCAGTTAATTCCACCAGAAAGCCGTTGGTGTTCGAGCACCGCGGCTTTCGCCTTTTT	ATTTCCCTGGTGTTGGCGCAGTATTCGCGCACCCCGGTCAAACCGGGGTCATTTTTTTTC
STnc1390(ncRNA0242)	focA(SL1344_0911)	+	2767702	2767720	2767764	2767766	-	1014092	1014117	1014138	1014140	10	131.474	1.79e-18	sRNA	CDS	TGTGAATTGATCCAGTTAATTCCACCAGAAAGCCGTTGGTGTTCGAGCACCGCGGCTTTCGCCTT	GTTTTTCTCACCTGACCGTGATGAGCTTCATCACTGATAACCTGATTCC
STnc1590(ncRNA0258)	ArcZ(ncRNA0002)	-	3633226	3633310	3633252	3633254	+	3511915	3511918	3511860	3511866	31	3.32423	1.96e-08	sRNA	sRNA	AGAAACCGGAGCGTACACATAGTACGTGAGGATTTCGAGCACTGCCCGGCCCTAAAATG	ATTTCCCTGGTGTTGGCGCAGTATTCGCGCACCCCGGTCAAACCGGGGTCATTTTTTTT
STnc1660(ncRNA0262)	ArcZ(ncRNA0002)	-	3489154	3489182	3489131	3489136	+	3511913	3511919	3511860	3511861	79	88.1603	5.02e-116	sRNA	sRNA	GGCAGCGAGATTTTACGCTCTTTAGTTGGGCGATACAGCACCAGCGTTTTAC	ATTTCCCTGGTGTTGGCGCAGTATTCGCGCACCCCGGTCAAACCGGGGTCATTTTTTTTC
STnc340(ncRNA0153)	ArcZ(ncRNA0002)	-	3657337	3657376	3657316	3657316	+	3511913	3511919	3511859	3511862	22	1263.91	1.5e-48	sRNA	sRNA	AGCAATTAATGAATCATCCAGGTAGTCCAAATAAGGACTTTATCTTTACCAGGGGATATGA	GATTTCCCTGGTGTTGGCGCAGTATTCGCGCACCCCGGTCAAACCGGGGTCATTTTTTTTC
STnc3580(ncRNA0332)	ArcZ(ncRNA0002)	+	1798793	1798861	1798841	1798886	+	3511914	3511917	3511859	3511862	40	612.876	3.3e-82	sRNA	sRNA	GTTACGTGGGAATGTCACAAGGCGGCCCCTTAGGGCGCCGCCTGTAAATCAGCAGGTGGGAGTTTAGTTGAGCAAGCCGGGGAAAATGCCTTTT	GATTTCCCTGGTGTTGGCGCAGTATTCGCGCACCCCGGTCAAACCGGGGTCATTTTTTT
STnc3630(ncRNA0336)	ArcZ(ncRNA0002)	+	1894031	1894072	1894126	1894126	+	3511915	3511917	3511860	3511862	10	82.0654	9.88e-16	sRNA	sRNA	TGTTGATGCTGTAGTATCAGTTGCAAACGGCAACGCGGAGAGATCCGACGGGGAAATGGGGCGTATGGCACTGGCGCCATTTGCGCCCCGGTAAGC	ATTTCCCTGGTGTTGGCGCAGTATTCGCGCACCCCGGTCAAACCGGGGTCATTTTTTT
STnc3730(ncRNA0341)	GcvB(ncRNA0014)	-	2449119	2449209	2449085	2449090	+	3156940	3156984	3156908	3156918	19	11.3352	6.75e-14	sRNA	sRNA	AAATTCCGCTTTGCAGGGTAAATAGCAGAATGCCGGATGGCGATGCTAACGCGTCTTATCCGGCCTACAACGGTATCTCACCTGTAGGCCGGACAAGGCGTTCACGCCGCCATCCGGCATTAGCT	TTTTCACTTCCTGTACATTTACCCTGTCTGTCCATAGTGATTAATGTAGCACCGCCATATTGCGGTGCTTTTTTTTG
STnc3730(ncRNA0341)	MgrR(ncRNA0043)	-	2449133	2449209	2449083	2449095	+	1550821	1550845	1550787	1550800	19	48.1437	2.98e-25	sRNA	sRNA	AAATTCCGCTTTGCAGGGTAAATAGCAGAATGCCGGATGGCGATGCTAACGCGTCTTATCCGGCCTACAACGGTATCTCACCTGTAGGCCGGACAAGGCGTTCACGCCGCCATCCGGCATTAGCTTT	AAAACACAAATCTATCCATGCAAGCATTTACCGCTGGTGAACCGGCGGTTTTTTTTTGC
STnc4210(ncRNA0373)	ArcZ(ncRNA0002)	-	1363945	1364005	1363923	1363953	+	3511913	3511918	3511860	3511863	60	35.1821	1.22e-67	sRNA	sRNA	TCTTATATCAACGGAGACATCACCTTCTTCTTCTGAGGCGTCACCACGGAATAACCGGGTTACGTAACGTAACCCGGTACAAT	ATTTCCCTGGTGTTGGCGCAGTATTCGCGCACCCCGGTCAAACCGGGGTCATTTTTTTT
STnc4210(ncRNA0373)	InvR(ncRNA0023)	-	1363947	1364011	1363924	1363924	+	3067543	3067587	3067516	3067523	51	6.60599	6.08e-24	sRNA	sRNA	GACTATTCTTATATCAACGGAGACATCACCTTCTTCTTCTGAGGCGTCACCACGGAATAACCGGGTTACGTAACGTAACCCGGTACAA	CCATTTGTCTCTTACGTTGCATTTATCAATCTGCTTTTTGATACAGCAGCACCTCGCTGCTGCTTTTTTTAT
STnc4210(ncRNA0373)	STnc440(ncRNA0162)	-	1363977	1364005	1363922	1363959	+	4580557	4580564	4580492	4580519	16	110.662	2.08e-27	sRNA	sRNA	TCTTATATCAACGGAGACATCACCTTCTTCTTCTGAGGCGTCACCACGGAATAACCGGGTTACGTAACGTAACCCGGTACAATA	ATTACTTTGTGGTGTAGCGTAACGGTAATTGTCCTCCTCATATTTGCGGCAGCGTAGTCTGCCGCTTTTTTTT
STnc4240(ncRNA0376)	MgrR(ncRNA0043)	+	3037195	3037282	3037273	3037320	+	1550834	1550844	1550798	1550804	16	55.6717	1.93e-22	sRNA	sRNA	TAAAAACCGGTGATTCGGCGCCTTATTGCAGACAGATAAACTTGTTCCCTGATGCATTGCCAAAAATGCTTGCGCCCAATCCGGCAGGCCAAGCAAGGCTCCCTGCCTTGCCAGATCGGCTCTCAG	CTATCCATGCAAGCATTTACCGCTGGTGAACCGGCGGTTTTTTTTTG
STnc480(ncRNA0167)	MgrR(ncRNA0043)	-	587383	587390	587339	587346	+	1550835	1550844	1550792	1550797	13	5.53678	1.28e-06	sRNA	sRNA	TTTTAATTTAGCTATGTTGGATTTTGCCACGGTGAGAACCGTGGCTTTTTTT	ACAAATCTATCCATGCAAGCATTTACCGCTGGTGAACCGGCGGTTTTTTTTTG
STnc510(ncRNA0176)	MgrR(ncRNA0043)	+	1288757	1288786	1288808	1288822	+	1550821	1550845	1550790	1550798	31	1532	3.21e-75	sRNA	sRNA	TTAATGTGGTTGTGAGATTTTCTCTTTAAATATCAAAATGTTGCATGGGTGATTTGTTGTTCTATA	ACACAAATCTATCCATGCAAGCATTTACCGCTGGTGAACCGGCGGTTTTTTTTTGC
STnc520(ncRNA0177)	ArcZ(ncRNA0002)	-	1290634	1290712	1290589	1290612	+	3511914	3511919	3511859	3511862	54	3.35784	1.08e-13	sRNA	sRNA	TGTTTTGCTTTATTAAGTGACCCAGGTAGAATTCGCAGCGGCTGGTAACCATTCATATTCGCACTATTGAACGATCACCGGCCAACCGCGCCAGGGTCTTGCATACGCTCTGGCGCGGTTAAAT	GATTTCCCTGGTGTTGGCGCAGTATTCGCGCACCCCGGTCAAACCGGGGTCATTTTTTTTC
STnc520(ncRNA0177)	MgrR(ncRNA0043)	-	1290618	1290675	1290589	1290619	+	1550821	1550844	1550794	1550807	28	3.71718	9.02e-09	sRNA	sRNA	GCGGCTGGTAACCATTCATATTCGCACTATTGAACGATCACCGGCCAACCGCGCCAGGGTCTTGCATACGCTCTGGCGCGGTTAAAT	AAATCTATCCATGCAAGCATTTACCGCTGGTGAACCGGCGGTTTTTTTTTG
STnc520(ncRNA0177)	STnc1010(ncRNA0214)	-	1290632	1290675	1290587	1290593	+	41654	41711	41579	41643	170	314.513	0	sRNA	sRNA	GCGGCTGGTAACCATTCATATTCGCACTATTGAACGATCACCGGCCAACCGCGCCAGGGTCTTGCATACGCTCTGGCGCGGTTAAATCC	ATGAAAGCCCGTGGCGATAAGCCGACGCCTGTCACCTGGGGCTAATGGAATAATTATAAAAAATTAAGTATGCCACTTAGGGCGATGCCCACCTGATCCGGTCACTCTGTGCCGGATCAGGTTCTTTTATTTC
STnc520(ncRNA0177)	STnc2000(ncRNA0278)	-	1290619	1290676	1290587	1290595	-	1204287	1204319	1204328	1204345	160	666.132	2.93e-287	sRNA	sRNA	AGCGGCTGGTAACCATTCATATTCGCACTATTGAACGATCACCGGCCAACCGCGCCAGGGTCTTGCATACGCTCTGGCGCGGTTAAATCC	CAATGAATAAAAAATGATATGCAGTGATGTATGTTTGCCGGGTCGCCCCGGCTTTTTTA
STnc610(ncRNA0182)	ArcZ(ncRNA0002)	-	3479121	3479211	3479089	3479117	+	3511915	3511917	3511859	3511862	15	11.6055	1.5e-11	sRNA	sRNA	AACCACTTTCCCTTAGAGTTCTTTTTCAAATATACTGTGAAGATTATGTCCTTCGTAGCTGGATTTGAAAAAAATTCTTTCGGAAGGTACACCAGACCGCCGTTGCGGTTATAGGGTTCAGTT	GATTTCCCTGGTGTTGGCGCAGTATTCGCGCACCCCGGTCAAACCGGGGTCATTTTTTT
STnc610(ncRNA0182)	CyaR(ncRNA0009)	-	3479013	3479105	3478985	3479000	+	2228930	2228932	2228863	2228879	22	5.41579	5.48e-10	sRNA	sRNA	GGTTATAGGGTTCAGTTATCTAAAGCCCCGATTTATCGGGGTTTTTTGTTATCTGACTACAGAATAACTGGGCTTTAGGCCCTTTTTTTATGTCTTGGGGGTGGGCTTGTCCACATTAGAG	ATAAATGCTAGCTGTACCAGGAACCACCTCCTTGGCCTGCGTAATCTCCCTTACGCAGGCTTATTTTTTG
STnc730(ncRNA0193)	STnc2110(ncRNA0286)	-	1462376	1462446	1462352	1462373	-	4030644	4030677	4030682	4030700	836	5545.97	0	sRNA	sRNA	CCGGTTGTTTATATTACGATAATTATTAGGCATTAACGGGAACCGGAGCGTTCCCGATTCACCATGGATGGCCTTTTCGGCAAGGGCTCCTCCCT	TAAATAGCTAATGAGCTCCTTGCCTTGCCCCGCCAGAGATGGCGGGGCTTTTTTTAT
STnc730(ncRNA0193)	STnc870(ncRNA0205)	-	1462414	1462447	1462355	1462358	+	4292562	4292601	4292537	4292543	420	207.159	0	sRNA	sRNA	CCCGGTTGTTTATATTACGATAATTATTAGGCATTAACGGGAACCGGAGCGTTCCCGATTCACCATGGATGGCCTTTTCGGCAAGGGCTCCTC	CCTGTTTTCCTTGCCATAGACACCATCCCTGTCTTCCCCCACATGATGTGGGGGTTTTTTTTATC
StyR-262(ncRNA0466)	RybD(ncRNA0062)	-	2445320	2445398	2445302	2445302	+	807426	807432	807352	807394	16	163.099	1.4e-29	sRNA	sRNA	AGACAAAATGTTTTGAACGTTGTCCCTCGCAGTTGTTGTTTTGCACAAATTTTTTAAATTTTATATGTGAAGTTGAGGTAGGCCATGTCGACACCGG	AATAAAACTCGCTGTTCCTGCGGGAACAGATAAATGTCCGTTTTCGACATGGTTGGCCACCTTTACGGTGGCCTTTTTTAT
StyR-277(ncRNA0468)	ArcZ(ncRNA0002)	-	2310883	2310961	2310858	2310918	+	3511913	3511918	3511860	3511862	74	919.315	2.91e-85	sRNA	sRNA	GGTTATTTGTTTAAAATTTGTTTATTTCCGCCCGGGAGATAATTCTCAAAAAGCGCTATCGCCCGGTCGCTGAGCGGGGTCATCAGCCACCAGGGGAGGCCAAT	ATTTCCCTGGTGTTGGCGCAGTATTCGCGCACCCCGGTCAAACCGGGGTCATTTTTTTT
StyR-29(ncRNA0419)	ArcZ(ncRNA0002)	-	52555	52583	52545	52546	+	3511916	3511917	3511859	3511861	15	7.44453	5.19e-09	sRNA	sRNA	CCTTTGAATTGTCCATATAGAACACATTTGGGAGTTGGA	GATTTCCCTGGTGTTGGCGCAGTATTCGCGCACCCCGGTCAAACCGGGGTCATTTTTTT
StyR-306(ncRNA0479)	ArcZ(ncRNA0002)	-	1204070	1204098	1204045	1204048	+	3511914	3511918	3511860	3511861	11	29.0532	8.02e-13	sRNA	sRNA	ACGCATTGAACCTCGAGAACCGTTGTCTTATAACACGTACCAGGGGGGCATGAT	ATTTCCCTGGTGTTGGCGCAGTATTCGCGCACCCCGGTCAAACCGGGGTCATTTTTTTT
StyR-51(ncRNA0427)	STnc790(ncRNA0199)	+	176100	176129	176155	176159	-	4209501	4209578	4209541	4209659	11	6529.76	2.3e-38	sRNA	sRNA	GTTAACCAGAAGATGTTGTGAATAACGCGCAAAAATGTGCGCGGCAACTAAACGCAGAAC	TAACTCGCATTGCAGCGCAGCGGCAACTGAGCGAATCCCCGGGCACATAGATAACTATGTGCCCGGGGTGAGCAAAGGCAGCCAACAAAGAGGCTGCGCGAATTATGACGGGAAACAGTTTAGTTGCCGTTTTTCCCGCCCGTCAGGGGCGGGTTTTTT
sucA(SL1344_0718)	InvR(ncRNA0023)	+	802620	802656	802677	802685	+	3067555	3067586	3067503	3067512	17	16.3512	1.95e-14	CDS	sRNA	ACAAACTGGAAGCTGATAAGGTCGCAACGCTGGAAGATGCCACTGAAATGGTCAACCTCTATCGCG	CTTTTACGGTTGGCCATTTGTCTCTTACGTTGCATTTATCAATCTGCTTTTTGATACAGCAGCACCTCGCTGCTGCTTTTTTTA
sucA(SL1344_0718)	STnc800(ncRNA0200)	+	800902	800969	800997	801002	-	4236849	4236871	4236892	4236902	148	39299.4	0	5UTR	sRNA	AAAGGTTCCTTAGCGGACGCAGATGACACGACAGTCCGCAACAAGTGAACCCCGGCACGCATACAGCGTATGCGTGGTTAGTATCCACGGCGAAATACTCG	AGTTTTTGAGTTGCCGTGGAAACTTTCAGCCCATCCCAGGATGGGCTTTTTTCT
sucC(SL1344_0720)	STnc440(ncRNA0162)	+	805296	805297	805339	805339	+	4580557	4580566	4580517	4580520	27	831.61	2.02e-67	CDS	sRNA	ATTACCTGAAGGATGGACAGAACACATGAACTTACATGAATATC	TAATTGTCCTCCTCATATTTGCGGCAGCGTAGTCTGCCGCTTTTTTTTAT
sucD(SL1344_0721)	ArcZ(ncRNA0002)	+	806500	806533	806535	806555	+	3511915	3511917	3511860	3511862	20	61.2795	6.83e-28	CDS	sRNA	TTAATAAAGATACCAAGGTTATCTGCCAGGGCTTCACCGGTAGCCAGGGGACTTTC	ATTTCCCTGGTGTTGGCGCAGTATTCGCGCACCCCGGTCAAACCGGGGTCATTTTTTT
sufI(SL1344_3146)	STnc2110(ncRNA0286)	-	3356623	3356630	3356578	3356583	-	4030646	4030669	4030694	4030694	19	4221.45	3.29e-61	5UTR	sRNA	ATCATTTTTTCAGGCACAACTCTTTAGCCTGTTTTACATGGAGCTTATATGTC	GCTAATGAGCTCCTTGCCTTGCCCCGCCAGAGATGGCGGGGCTTTTTTT
sugE(SL1344_4275)	ArcZ(ncRNA0002)	+	4602000	4602038	4602056	4602059	+	3511915	3511917	3511861	3511863	13	82.9789	4.31e-20	5UTR	sRNA	TTTCATCCGTATACGTTACAGGACGACCTGTAAACGCTATTCTCACCGGGGACGGCCCCA	TTTCCCTGGTGTTGGCGCAGTATTCGCGCACCCCGGTCAAACCGGGGTCATTTTTTT
sugR(SL1344_3718)	ArcZ(ncRNA0002)	+	3971592	3971593	--	--	+	3511916	3511917	3511859	3511860	14	643.41	9.38e-30	CDS	sRNA	ATTACGGCTACCGGGGAATGGG	GATTTCCCTGGTGTTGGCGCAGTATTCGCGCACCCCGGTCAAACCGGGGTCATTTTTTT
tag(SL1344_3608)	ArcZ(ncRNA0002)	+	3851130	3851165	--	--	+	3511915	3511918	3511860	3511863	10	191.486	1.44e-18	CDS	sRNA	GTTTGTCGGTACGACTATCTGTTACTCCTTTATGCAGGCGTGCGGACTGGTCAATG	ATTTCCCTGGTGTTGGCGCAGTATTCGCGCACCCCGGTCAAACCGGGGTCATTTTTTTT
tag(SL1344_3608)	STnc800(ncRNA0200)	+	3850415	3850477	3850499	3850502	-	4236850	4236857	4236892	4236901	26	12416.2	1.14e-93	5UTR	sRNA	TGCCAGGCATATGTGGTATTGATAAAAAACGAGCAGGCCATAAGGCCCGCCAGACAACGCAATGTCCGGCGACCACGGCGTTTTCTTA	GTTTTTGAGTTGCCGTGGAAACTTTCAGCCCATCCCAGGATGGGCTTTTTTC
talB(SL1344_0007)	ArcZ(ncRNA0002)	+	8501	8557	8531	8588	+	3511915	3511918	3511860	3511862	17	7.10261	1.01e-09	CDS	sRNA	GAGTTCCTGTGGCAGCATCACCAGGACCCCATGGCGGTTGACAAACTGGCGGATGGTATCCGTAAGTTTGCGGTAGACCAGGAAAAAC	ATTTCCCTGGTGTTGGCGCAGTATTCGCGCACCCCGGTCAAACCGGGGTCATTTTTTTT
tar(SL1344_1854)	ArcZ(ncRNA0002)	-	1972362	1973611	1972336	1973510	+	3511913	3511919	3511858	3511863	69	54.2223	6.93e-34	CDS	sRNA	GAAAAATATCAGCGCTATCAGGCCGCATTAGCCGAACTTATTCAGTTTCTGGACAATGGCAATATGGATGCCTACTTCGCCCAGCCAACCCAGGGAATGCAAAACGCGTTGGGCGAGGCGCTGGGCAATTACGCCCGGGTGAGCGAAAACCTGTACCGCCAGACATTTGATCAAAGTGCTCATGACTACCGTTTTGCGCAATGGCAACTGGGGGTTCTTGCGGTCGTGCTGGTGCTGATTTTGATGGTGGTTTGGTTCGGCATTCGTCATGCCCTGCTTAACCCATTAGCGCGAGTGATTACTCATATCCGTGAAATTGCCAGCGGCGATCTGACGAAAACGCTCACCGTCTCAGGACGTAATGAAATTGGCGAACTGGCGGGAACGGTTGAACATATG…	CGATTTCCCTGGTGTTGGCGCAGTATTCGCGCACCCCGGTCAAACCGGGGTCATTTTTTTTC
tar(SL1344_1854).cheR(SL1344_1853).IGR	ArcZ(ncRNA0002)	-	1972221	1972242	1972190	1972196	+	3511915	3511918	3511861	3511861	20	34.0441	2.28e-23	IGR	sRNA	AATGTGTAATACGGGAAGCATGGCGCTGCCGCAGGGCGCGCCCGTTGTACTTT	TTTCCCTGGTGTTGGCGCAGTATTCGCGCACCCCGGTCAAACCGGGGTCATTTTTTTT
tatD(SL1344_3930).AS	ArcZ(ncRNA0002)	-	4204113	4204139	4204090	4204090	+	3511913	3511917	3511860	3511861	11	1263.82	7.83e-25	Antisense	sRNA	AAAGCAGTGCAGTATTGCACCAGGAAGACTATCCAGCCAGGGATCAAGCA	ATTTCCCTGGTGTTGGCGCAGTATTCGCGCACCCCGGTCAAACCGGGGTCATTTTTTT
tatE(SL1344_0620)	STnc870(ncRNA0205)	+	694013	694046	694069	694075	+	4292597	4292598	4292540	4292542	10	318.244	7.01e-22	5UTR	sRNA	GTTAATCCGGCGCGTTACGCAGCCTGTTTTTAGTGAAGAAGGTATCTATGGGTGAGATTAGTA	GTTTTCCTTGCCATAGACACCATCCCTGTCTTCCCCCACATGATGTGGGGGTTTTTTTT
thrL(SL1344_0001)	GcvB(ncRNA0014)	+	102	284	137	313	+	3156861	3156986	3156778	3156935	82	66.5139	1.89e-61	CDS	sRNA	AAAATTTATTGACTTAGGCGGGCAGATACTTTAACCAATATAGGAATACAAGACAGACAAATAAAAATGACAGAGTACACAACATCCATGAACCGCATCAGCACCACCACCATTACCACCATCACCATTACCACAGGTAACGGTGCGGGCTGACGCGTACAGGAAACACAGAAAAAAGCCCGCACCTGAACAGTGCGGGCTTTTTTTTCGAC	ACTTCCTGAGCCGGAACGAAAAGTTTTATCGGAATGCGTGTTCTGATGGGCTTTTGGCTTACGGTTGTGATGTTGTGTTGTTGTGTTTGCAATTGGTCTGCGATTCAGACCACGGTAGCGAGACTACCCTTTTTCACTTCCTGTACATTTACCCTGTCTGTCCATAGTGATTAATGTAGCACCGCCATATTGCGGTGCTTTTTTTTGTA
tktA(SL1344_3052)	Spf(ncRNA0075)	-	3259113	3259186	3259047	3259109	+	4230562	4230614	4230518	4230553	250	9.60566	1.71e-79	5UTR	sRNA	GGCAAATTTTCCGGCGTAGCCCAAAACGCGCTGTCGTCAAGTCGTTACGGGCATGGCCTTTCAACATCCGATCTGGAGTCAAAATGTCCTCACGTAAAGAGCTTGCCAATGCTATTCGTGCGCTGAGCATGGACGCAGTA	AAGATGTTCTATCTTTCAGACCTTTTACTTCACGTAATCGGATTTGGCTGAATATTTTAGCCGCCCCAGTCAGTTTATGACTGGGGCGTTTTTTATT
tolB(SL1344_0730)	STnc870(ncRNA0205)	+	816511	816553	816549	816549	+	4292594	4292599	4292539	4292548	14	49.9571	2.05e-19	CDS	sRNA	CCAAGTCTGGCACCTAACGGCACGATGGTAATCTACAGC	TGTTTTCCTTGCCATAGACACCATCCCTGTCTTCCCCCACATGATGTGGGGGTTTTTTTTA
tolB(SL1344_0730).pal(SL1344_0731).IGR	STnc1920(ncRNA0276)	+	816602	816685	816708	816712	+	2756642	2756647	2756584	2756589	28	3036.82	3.01e-86	IGR	sRNA	TCAAAGCGCGTCTTCCGGCAACTGATGGTCAGGTGAAATCGCCTGCCTGGTCGCCGTATCTGTGATAATAATTAATTGATTACTAAAGGAATTAAAGAAATGCAACTGAAC	TGTTTATGCATTTCTGAAACTCCCCCGCAGGTAAGCTCCTTTTCCCTCCTGCGGGAATTTTTTA
tpx(SL1344_1612)	ArcZ(ncRNA0002)	+	1732401	1732455	1732464	1732472	+	3511882	3511920	3511858	3511862	441	659.411	0	CDS	sRNA	TTTCGACGTTAACTATAAGTAAATAGGAACATAATTATGTCACAGACTGTACATTTCCAGGGTAACCCGGTC	CGATTTCCCTGGTGTTGGCGCAGTATTCGCGCACCCCGGTCAAACCGGGGTCATTTTTTTTCC
treR(SL1344_4386)	ArcZ(ncRNA0002)	-	4719913	4719988	4719885	4719897	+	3511913	3511918	3511854	3511864	53	716.586	4.1e-110	5UTR	sRNA	TACGTAATTAAACCAACGATAAACCAGACTTTGCCCATTGCCCTTCGCTTGAGTAAAGTTACTCTTTTTATCACCATCAGCGTCACGCCACGGGAAAACAGGAT	GCCACGATTTCCCTGGTGTTGGCGCAGTATTCGCGCACCCCGGTCAAACCGGGGTCATTTTTTTT
trkH(SL1344_3939)	CyaR(ncRNA0009)	+	4216489	4216526	4216551	4216560	+	2228919	2228932	2228867	2228878	15	110.775	1.55e-24	CDS	sRNA	GCTTTCGCCTCGGTAGTGGCTACGCTTAATAACCTGGGACCGGGGCTGGGGGTGGTTGCTGATAACTTCGCC	ATGCTAGCTGTACCAGGAACCACCTCCTTGGCCTGCGTAATCTCCCTTACGCAGGCTTATTTTTTG
trmU(SL1344_1172)	ArcZ(ncRNA0002)	-	1278868	1278960	1278841	1278892	+	3511913	3511919	3511809	3511864	105	140.39	1.82e-130	CDS	sRNA	CGGTATCTGCTTTATCGGCGAGCGCAAATTCCGCGACTTTTTAGGGCGCTATCTGCCTGCGCAGCCGGGGAAAATCATTACCGTTGACGGCGATGAAATCGGCGAGCATCAGGGTCTGAT	AAAACAGGACTGCGCCTTTGACATCATCATAATAAGCACGGCGCAGCCACGATTTCCCTGGTGTTGGCGCAGTATTCGCGCACCCCGGTCAAACCGGGGTCATTTTTTTTC
trpS(SL1344_3448)	ArcZ(ncRNA0002)	-	3658793	3658881	3658770	3658780	+	3511913	3511919	3511859	3511867	126	247.602	6.72e-177	5UTR	sRNA	TACAATTATGGCGAAGCGATCGCTCTTAGCGAGCCGGACGTCATTTATGACAGTTTTAACGATCTTTTGCCCGCACTTGGGCTTCCGCATAGCGATAACCAGGAAATAAAAA	GATTTCCCTGGTGTTGGCGCAGTATTCGCGCACCCCGGTCAAACCGGGGTCATTTTTTTTC
truA(SL1344_2337)	ArcZ(ncRNA0002)	-	2478316	2478376	2478286	2478333	+	3511915	3511919	3511860	3511862	21	24.4963	9.67e-22	CDS	sRNA	GGAATATTGTCGGCAGCCTGCTGGAAGTAGGCGCTCACAACCAGCCGGAGAGCTGGATCGCAGAGCTGTTAGCGGCCAGGGACAGAACGCT	ATTTCCCTGGTGTTGGCGCAGTATTCGCGCACCCCGGTCAAACCGGGGTCATTTTTTTTC
trxA(SL1344_3875)	ArcZ(ncRNA0002)	+	4146295	4146336	4146362	4146363	+	3511913	3511919	3511860	3511862	43	164.714	3.67e-73	5UTR	sRNA	TCAACCTTTGTTGGCGAAGTTAACATCAGCACCTCGTTGGTTAATGCTACACCAACACGCCAGGCTTAT	ATTTCCCTGGTGTTGGCGCAGTATTCGCGCACCCCGGTCAAACCGGGGTCATTTTTTTTC
tsx(SL1344_0407)	ArcZ(ncRNA0002)	-	467257	467263	467233	467233	+	3511914	3511918	3511859	3511862	17	79.7243	1.38e-25	CDS	sRNA	GCTTTACCAACTTTGACTGGGGATCTGATTT	GATTTCCCTGGTGTTGGCGCAGTATTCGCGCACCCCGGTCAAACCGGGGTCATTTTTTTT
tsx(SL1344_0407)	frdD(SL1344_4277)	-	467922	467961	467886	467886	-	4603012	4603017	4603058	4603058	22	923.876	3.26e-57	5UTR	3UTR	CAGAAACACGAAATATTTAGAAACGCAAATTGCGTTCTTTTCACTCCCGCAAGGGATTTCAAACAGTGGCATACAT	GTTGCCACGACGCCCTCTTATCTACCCGATAAGAGGGCATTTTTTCT
tsx(SL1344_0407)	RybB(ncRNA0061)	-	467924	467956	467881	467906	-	941812	941814	941885	941886	18	26.9792	6.33e-20	5UTR	sRNA	ACACGAAATATTTAGAAACGCAAATTGCGTTCTTTTCACTCCCGCAAGGGATTTCAAACAGTGGCATACATATGAA	GCTTTTCTTTGATGTCCCCATTTTGTGGAGCCCATCAACCCCGCCATTTCGGTTCAAGGTTGGTGGGTTTTTTGT
tsx(SL1344_0407)	STnc1010(ncRNA0214)	-	467901	467965	467875	467896	+	41662	41712	41627	41649	1631	40165.1	0	5UTR	sRNA	TCCGCAGAAACACGAAATATTTAGAAACGCAAATTGCGTTCTTTTCACTCCCGCAAGGGATTTCAAACAGTGGCATACATATGAAAAAAAC	AATAATTATAAAAAATTAAGTATGCCACTTAGGGCGATGCCCACCTGATCCGGTCACTCTGTGCCGGATCAGGTTCTTTTATTTCA
ttk(SL1344_3698)	STnc870(ncRNA0205)	+	3946493	3946587	3946608	3946610	+	4292576	4292599	4292541	4292547	23	481.837	4.13e-52	5UTR	sRNA	TTTACGCATCCCCATAACGTCATAATACTGCCGCAAGCGCTGAGTTTGCGGTTATAGCGTGGGTGCTCGCCTGGCAAGTGCTTATTTTCAGGGGTATTTTGTAACATGGCAGAAAAAC	TTTTCCTTGCCATAGACACCATCCCTGTCTTCCCCCACATGATGTGGGGGTTTTTTTTA
udp(SL1344_3922)	Spf(ncRNA0075)	+	4196363	4196370	4196398	4196451	+	4230611	4230612	4230501	4230516	15	17.9426	1.55e-13	CDS	sRNA	TCTCTTTGCTTCTTCTGACAAACCCGATTCACAGAGGAGTTTTATATGTCCAAGTCTGATGTTTTTCATCTCGGCCTCACCAAAAACGA	ACGTAGGGTACAGAGGTAAGATGTTCTATCTTTCAGACCTTTTACTTCACGTAATCGGATTTGGCTGAATATTTTAGCCGCCCCAGTCAGTTTATGACTGGGGCGTTTTTTA
ugpA(SL1344_3522).AS	RydC(ncRNA0064)	+	3747584	3747586	3747616	3747619	+	1686564	1686590	1686530	1686530	10	8.13678	7.85e-07	Antisense	sRNA	CAGCGCGAGCGGAACACCGGACGGGATGATGACATG	GATGTAGACCCGTCCTCCTTCGCCTGCGTCACGGGTCCTGGTTAGACGCAGGCGTTTTCTG
ugtL(SL1344_1531)	STnc440(ncRNA0162)	-	1648519	1648544	1648495	1648497	+	4580542	4580566	4580518	4580518	17	25634.7	1.22e-57	5UTR	sRNA	GTTTCCAGTTGGGCGATAAAATTATAAAAACCTGCGAGGAGGCTCAAAAT	AATTGTCCTCCTCATATTTGCGGCAGCGTAGTCTGCCGCTTTTTTTTAT
ushA(SL1344_0487)	ArcZ(ncRNA0002)	+	553096	553593	553172	553615	+	3511913	3511919	3511859	3511862	169	1341.55	4.76e-303	CDS	sRNA	TTGATATTGAGTCAGGGAGAGAAAGATGAAATTTTTGAAACGGGGTGTGGCGCTGGCGTTACTGGCGGCGTTCGCGCTGACGACTCAGCCTGCACAGGCTTACGAAAAAGATAAAACCTATAAAATTACTATCCTGCATACCAACGATCACCACGGTCACTTCTGGCGCAGCGAATATGGCGAATATGGTCTGGCGGCGCAAAAAACGCTGGTGGACAGTATCCGTAAAGAGGTGGCGCAAGAGGGGGGAAGCGTCCTGTTGTTATCCGGCGGCGACATTAATACCGGGGTGCCGGAATCCGATCTCCAGGATGCGGAGCCCGATTTCCGCGGGATGAATCTGATTGGCTACGACGCTATGGCCGTCGGTAATCATGAATTTGATAATCCGCTCACCGT…	GATTTCCCTGGTGTTGGCGCAGTATTCGCGCACCCCGGTCAAACCGGGGTCATTTTTTTTC
uspA(SL1344_3556)	STnc870(ncRNA0205)	+	3782147	3782168	3782186	3782191	+	4292565	4292600	4292541	4292544	305	6558.84	0	5UTR	sRNA	CATCGACAACTTATGGAAGGAGTAACACTATGGCTTATAAACACA	TTTTCCTTGCCATAGACACCATCCCTGTCTTCCCCCACATGATGTGGGGGTTTTTTTTAT
valS(SL1344_4405)	STnc790(ncRNA0199)	-	4740481	4740542	4740454	4740454	-	4209499	4209507	4209540	4209543	37	21250.9	4.99e-100	5UTR	sRNA	CCTTACGAAGAAACTTTGAAACAACTGGCGCGCGAACGCTACAAAGCCTACCGCGTGGCTGGTTTTAACCTGAATACGGCAACCTGGAA	AGTTTAGTTGCCGTTTTTCCCGCCCGTCAGGGGCGGGTTTTTTCA
visB(SL1344_3033)	ArcZ(ncRNA0002)	-	3239784	3239811	3239760	3239769	+	3511913	3511917	3511809	3511861	12	23.5678	7.18e-13	CDS	sRNA	AGCGGTGATAGCGAATGTCGCAACCGCTATCCCGCACCAGGGACGCGCCTTT	AAAACAGGACTGCGCCTTTGACATCATCATAATAAGCACGGCGCAGCCACGATTTCCCTGGTGTTGGCGCAGTATTCGCGCACCCCGGTCAAACCGGGGTCATTTTTTT
xylR(SL1344_3627).xylA(SL1344_3626).IGR	ArcZ(ncRNA0002)	-	3869297	3869302	--	--	+	3511916	3511917	3511858	3511861	14	86.9472	9.16e-22	IGR	sRNA	CGGTTTTTTGTTTATTTGCCAGGATT	CGATTTCCCTGGTGTTGGCGCAGTATTCGCGCACCCCGGTCAAACCGGGGTCATTTTTTT
yaeC(SL1344_0246)	GcvB(ncRNA0014)	-	286318	286408	286288	286348	+	3156949	3156985	3156845	3156850	14	46.5333	5.45e-18	CDS	sRNA	TTATCCGGCGATCGCATCGTCAGGGCTGTCACGCATAAGTAACGTTAAACACAACACAAATACTCATTAAGGAAATAAGCATGGCGTTCAAATTCAAAACCTTTGCGGCAGTGGGTGCTCT	TGATGTTGTGTTGTTGTGTTTGCAATTGGTCTGCGATTCAGACCACGGTAGCGAGACTACCCTTTTTCACTTCCTGTACATTTACCCTGTCTGTCCATAGTGATTAATGTAGCACCGCCATATTGCGGTGCTTTTTTTTGT
yafB(SL1344_0250)	RybD(ncRNA0062)	+	294896	294927	294947	294949	+	807425	807433	807391	807394	35	19.4403	2.11e-32	5UTR	sRNA	TTATTAAGAGCCCTGAGCATTAGCTCAGGGCTTTTTCTTTCCATGTCATTTAAT	GTTTTCGACATGGTTGGCCACCTTTACGGTGGCCTTTTTTATG
yafK(SL1344_0308)	MgrR(ncRNA0043)	-	356213	356288	356189	356225	+	1550829	1550845	1550764	1550796	24	66.6259	1.25e-34	3UTR	sRNA	AACGCCCATTCGCCTGGCATAATCTTTTGCCAGGTTTCATTCCCCGTTAGCGGCTGGGTAGCAATCACGGTAACCACGTCATTTGGCGTGGTCTGTGAAC	AATTTGCCCGGTAGCGTATAAGCAAAACACAAATCTATCCATGCAAGCATTTACCGCTGGTGAACCGGCGGTTTTTTTTTGC
yaiW(SL1344_0372)	ArcZ(ncRNA0002)	+	431254	431272	431320	431327	+	3511913	3511918	3511858	3511866	91	170.092	6.74e-154	CDS	sRNA	ATATCGCGACAACGTTTAAGAGCCAGGGGCTGGCGCCGACGGTAGAAAATATCTGTTCGGTGCTGGCTGTCGCC	CGATTTCCCTGGTGTTGGCGCAGTATTCGCGCACCCCGGTCAAACCGGGGTCATTTTTTTT
ybaL(SL1344_0485).AS	ArcZ(ncRNA0002)	+	550129	550175	--	--	+	3511916	3511918	3511861	3511861	12	172.34	1.25e-21	Antisense	sRNA	CGAATCCCGCGTTCGCGCAGTTCATCCACGCGGGTACGGGACGTTTCGATAACCACCAGCGGAATCC	TTTCCCTGGTGTTGGCGCAGTATTCGCGCACCCCGGTCAAACCGGGGTCATTTTTTTT
ybaZ(SL1344_0460)	GcvB(ncRNA0014)	-	523764	523776	523735	523739	+	3156980	3156985	3156922	3156926	10	18.4653	7.71e-10	CDS	sRNA	GCATTAACGCAGGATTCTATTATGGATATTCAGGACACATTT	ACATTTACCCTGTCTGTCCATAGTGATTAATGTAGCACCGCCATATTGCGGTGCTTTTTTTTGT
ybeJ(SL1344_0654)	GcvB(ncRNA0014)	-	729315	729388	729261	729310	+	3156913	3156985	3156835	3156850	56	132.971	2.14e-86	5UTR	sRNA	GCGCACTTCGCAAAAATAAACAATATCGCAGCAAAATATTTACAACAAGCCACACTAAATGTTAACAAACACACATAACACTGCACGCGCAAGTTGCAGGCAATAACAACATCACAATAGCTATCAAT	CTTACGGTTGTGATGTTGTGTTGTTGTGTTTGCAATTGGTCTGCGATTCAGACCACGGTAGCGAGACTACCCTTTTTCACTTCCTGTACATTTACCCTGTCTGTCCATAGTGATTAATGTAGCACCGCCATATTGCGGTGCTTTTTTTTGT
ybeJ(SL1344_0654).lnt(SL1344_0655).IGR	ArcZ(ncRNA0002)	+	729337	729376	729400	729403	+	3511914	3511920	3511860	3511863	12	393.919	2.15e-24	IGR	sRNA	TGGCTTGTTGTAAATATTTTGCTGCGATATTGTTTATTTTTGCGAAGTGCGCCGCACCGTTCAGAGG	ATTTCCCTGGTGTTGGCGCAGTATTCGCGCACCCCGGTCAAACCGGGGTCATTTTTTTTCC
ybfM(SL1344_0669)	ChiX(ncRNA0003)	+	748810	748975	748911	749018	+	555538	555576	555500	555536	4238	181.395	0	CDS	sRNA	AGAAAGAGATTGATAATTCGCATCGCGAAAAATAGTCTATTTAACGTAGTAAATGAGGTTTCTCAGCGCTACTTTTTATTTTTTCGCTGTTCGCTTTTGTCGGCAGCAATTTATACGTCAAAGAGGATTAACTTATGCGTACGTTTAGTGGCAAACGTAGTACGCTGGCTCTGGCTATCGCCGGTATCACAGCAATGTCGGGGTGGATC	GCGAAAGCGTCGGGATAATAATAACGATGAAATTCCTCTTTGACGGGCCAATAGCGATATTGGCCATTTTTTTATTT
ybiP(SL1344_0809)	ArcZ(ncRNA0002)	-	901000	901006	--	--	+	3511916	3511918	3511860	3511861	11	11.086	1.18e-08	5UTR	sRNA	GGTAATGACCCTTCGCGCCAGGGTTAG	ATTTCCCTGGTGTTGGCGCAGTATTCGCGCACCCCGGTCAAACCGGGGTCATTTTTTTT
ybiP(SL1344_0809)	STnc1010(ncRNA0214)	-	900970	901002	900946	900948	+	41678	41710	41636	41638	10	280.763	1.12e-21	5UTR	sRNA	ATGACCCTTCGCGCCAGGGTTAGCACATGGCGTTTTTGCAATAGTGGCATATGAATT	AAAAAATTAAGTATGCCACTTAGGGCGATGCCCACCTGATCCGGTCACTCTGTGCCGGATCAGGTTCTTTTATTT
ybiR(SL1344_0811)	STnc870(ncRNA0205)	+	902013	902056	902079	902080	+	4292596	4292599	4292541	4292554	13	215.507	5.24e-26	CDS	sRNA	TTTTTACGGGCGCTGCGGCGTGACCGTTTTTTTCAGTTGTTGATCATTGTGGGGATGGCGTTAAGCCT	TTTTCCTTGCCATAGACACCATCCCTGTCTTCCCCCACATGATGTGGGGGTTTTTTTTA
ybiT(SL1344_0813)	MgrR(ncRNA0043)	+	904265	904281	904303	904374	+	1550821	1550845	1550754	1550801	21	131.349	4.53e-36	CDS	sRNA	GGTTTGTCACATCTTTTTTCAGGATAAGCTTGTGTTAGTTTCCAGCAACGTTACCATGCAGTTCGGCAGTAAGCCGCTGTTCGAAAACATTTCCGTCAAATTTGGCGGCG	TCCTCGCAAGAATTTGCCCGGTAGCGTATAAGCAAAACACAAATCTATCCATGCAAGCATTTACCGCTGGTGAACCGGCGGTTTTTTTTTGC
ybjU(SL1344_0873)	ArcZ(ncRNA0002)	-	966625	966634	966603	966603	+	3511913	3511919	3511860	3511862	101	1786.31	8.27e-223	5UTR	sRNA	ACATCACCTTTTAAAATCCAGGGATGTGCCAT	ATTTCCCTGGTGTTGGCGCAGTATTCGCGCACCCCGGTCAAACCGGGGTCATTTTTTTTC
ybjX(SL1344_0879)	CyaR(ncRNA0009)	-	974986	974993	--	--	+	2228928	2228932	2228863	2228874	10	11.3068	4.51e-08	CDS	sRNA	GCTTACAGATAATACCTGGTACACTTCA	ATAAATGCTAGCTGTACCAGGAACCACCTCCTTGGCCTGCGTAATCTCCCTTACGCAGGCTTATTTTTTG
ybjY(SL1344_0880)	ArcZ(ncRNA0002)	+	975099	975147	975167	975171	+	3511913	3511919	3511860	3511863	103	1821.71	1.97e-227	CDS	sRNA	TTTAGATACGGTTTACTTTCTGGTTAAAATTTTGCCGTCAGGGTTTCTATGCGTGCTAAGGGAAAGAAATTTA	ATTTCCCTGGTGTTGGCGCAGTATTCGCGCACCCCGGTCAAACCGGGGTCATTTTTTTTC
ycaI(SL1344_0920)	ArcZ(ncRNA0002)	+	1026798	1026839	1026857	1026862	+	3511913	3511919	3511860	3511862	37	4251.75	2.67e-85	CDS	sRNA	TAAAACAGCGCTACCGACAGCAGGCGTATCAGTGGTTTGATACACCCCACCAGGGGCAAATTTCG	ATTTCCCTGGTGTTGGCGCAGTATTCGCGCACCCCGGTCAAACCGGGGTCATTTTTTTTC
ydeZ(SL1344_4025)	CyaR(ncRNA0009)	+	4307886	4307907	4307932	4307941	+	2228924	2228932	--	--	24	472.638	6.3e-29	CDS	sRNA	ATTTATTTGGTGGTAGCGCATTATTGTTATCTGGTATGGCTGGCGCCACGGGTTAT	TAATCTCCCTTACGCAGGCTTATTTTTTG
yeiP(SL1344_2188)	ArcZ(ncRNA0002)	+	2309013	2309067	2309089	2309092	+	3511914	3511917	3511859	3511862	10	60.4692	1.31e-14	3UTR	sRNA	TTTCACATTTTTCGGCTGCGCCCCAGGGCGCAGTCTGCCCCTTTTATTTATTGACTGTTCTGCACCAGGCAAGAGAAACG	GATTTCCCTGGTGTTGGCGCAGTATTCGCGCACCCCGGTCAAACCGGGGTCATTTTTTT
yfgA(SL1344_2486)	DapZ(ncRNA0010)	-	2656117	2656124	2656094	2656094	+	74922	74924	74846	74853	12	920.624	2.17e-31	CDS	sRNA	GCGAATGAATACTGAAGCCACGCACGACCAA	AAATACCTTCGTGATGTGGTTGTGGTAATCAAGATTAATTGATTACAAAGGGCAATATATTATTGCCCTTTTGTTTTTG
yfhD(SL1344_2529)	InvR(ncRNA0023)	+	2710600	2710609	2710633	2710633	+	3067543	3067587	3067492	3067521	23	62.8742	7.12e-29	CDS	sRNA	ATTTACAGCGTTTAAAAGAGACAAAGTTTCCCGA	AGCTATGGTCACTTTTACGGTTGGCCATTTGTCTCTTACGTTGCATTTATCAATCTGCTTTTTGATACAGCAGCACCTCGCTGCTGCTTTTTTTAT
ygcX(SL1344_2941)	MgrR(ncRNA0043)	-	3132027	3132034	3131978	3132004	+	1550815	1550843	1550795	1550797	12	62.4075	9.59e-18	3UTR	sRNA	GTTTGATAATAAGCGTCCTTGCATGGTGCGTTAAGTCAGAGCCGGTTCCGTAAGGAA	AATCTATCCATGCAAGCATTTACCGCTGGTGAACCGGCGGTTTTTTTTT
yghB(SL1344_3136)	ArcZ(ncRNA0002)	+	3343224	3343282	3343298	3343300	+	3511915	3511918	3511861	3511861	18	26.0145	2.8e-19	CDS	sRNA	TTTTTTGCCGACGATTGGCATTCTCACCGCCGCGGCCAGTCTCGGCTGCTGGCTAAGTTATATCCAGGGACGCTGGC	TTTCCCTGGTGTTGGCGCAGTATTCGCGCACCCCGGTCAAACCGGGGTCATTTTTTTT
yheS(SL1344_3426).AS	STnc2000(ncRNA0278)	-	3633231	3633232	3633195	3633199	-	1204288	1204295	1204328	1204330	10	72.5307	6.34e-16	Antisense	sRNA	GGGATAGGCTCTTAGTCGTTCTGCATCATCTGCTCAAG	GATATGCAGTGATGTATGTTTGCCGGGTCGCCCCGGCTTTTTT
yhjA(SL1344_3786)	ArcZ(ncRNA0002)	-	4040421	4040495	4040391	4040400	+	3511913	3511919	3511860	3511861	70	1609.12	5.87e-154	CDS	sRNA	GCCTCTAAATCCTGGGATGAAATTATTAGCAAGCTTGATAAAGATCCTGTCCTGAAAAAAGATTTCCAGGCGGTTTATCCGCAAGGATTTACCGGGGAAAATATT	ATTTCCCTGGTGTTGGCGCAGTATTCGCGCACCCCGGTCAAACCGGGGTCATTTTTTTTC
yhjC(SL1344_3572).yhjD(SL1344_3573).IGR	ArcZ(ncRNA0002)	+	3802931	3802931	--	--	+	3511915	3511918	3511860	3511862	29	1332.91	7.98e-64	IGR	sRNA	TTTCAGCATCCACCGGGGAGA	ATTTCCCTGGTGTTGGCGCAGTATTCGCGCACCCCGGTCAAACCGGGGTCATTTTTTTT
yhjE(SL1344_3574)	GcvB(ncRNA0014)	+	3804348	3804371	3804393	3804414	+	3156914	3156984	3156808	3156845	33	213.291	1.23e-55	CDS	sRNA	ATTCGTTCGCTAAAAATAAGAAAATAGTATGCAAGCAACCGCCACAACACTCGACCATGAGCAGGAA	GGAATGCGTGTTCTGATGGGCTTTTGGCTTACGGTTGTGATGTTGTGTTGTTGTGTTTGCAATTGGTCTGCGATTCAGACCACGGTAGCGAGACTACCCTTTTTCACTTCCTGTACATTTACCCTGTCTGTCCATAGTGATTAATGTAGCACCGCCATATTGCGGTGCTTTTTTTTG
yhjJ(SL1344_3578)	ArcZ(ncRNA0002)	-	3811380	3811503	3811361	3811395	+	3511913	3511919	3511859	3511868	147	363.856	2.13e-238	5UTR	sRNA	GGGATTATTTCACTTCTTCCGTGACATTTTTAGGTTCTCGCGGTCTAACACGAAGTGTTTTTACGTCATATTCAGGCATCCCTGCCGGGGCTGTCTTTTTATTACCAGGATTGTTGATCAGGGGTTCACATGCAGGGCACAAA	GATTTCCCTGGTGTTGGCGCAGTATTCGCGCACCCCGGTCAAACCGGGGTCATTTTTTTTC
yhjW(SL1344_3600)	ArcZ(ncRNA0002)	-	3843616	3843696	3843592	3843594	+	3511916	3511917	3511859	3511862	13	32.1208	2.08e-15	5UTR	sRNA	CGTGCTTGTAGACTTTCTTACATCTGCGTTAGCCGCATATTTACCTGTTTGATTAAAGAATCGTTGTACAGGTCGTTTTTATCCCGATTCCCAGGGTTTGTTTGC	GATTTCCCTGGTGTTGGCGCAGTATTCGCGCACCCCGGTCAAACCGGGGTCATTTTTTT
yhjW(SL1344_3600)	MgrR(ncRNA0043)	-	3843542	3843697	3843501	3843598	+	1550821	1550844	1550786	1550811	61	409.085	1.58e-99	CDS	sRNA	CCGTGCTTGTAGACTTTCTTACATCTGCGTTAGCCGCATATTTACCTGTTTGATTAAAGAATCGTTGTACAGGTCGTTTTTATCCCGATTCCCAGGGTTTGTTTGCATGAGATACATTAAATCGATGACGCAACAGAAACTTAGTTTCTTGCTTGCGCTCTATATCGGTCTGTTTATGAATTGCGCCGTGTTTTACC	CAAAACACAAATCTATCCATGCAAGCATTTACCGCTGGTGAACCGGCGGTTTTTTTTTG
yidC(SL1344_3809)	ArcZ(ncRNA0002)	+	4067673	4067680	4067727	4067737	+	3511913	3511917	3511860	3511863	23	114.901	4.4e-37	5UTR	sRNA	CCTTTACACCCTGGTGGTGACGATCCCGTCCCGCCCGGACCATTTGATACCAGAGAACACTAACG	ATTTCCCTGGTGTTGGCGCAGTATTCGCGCACCCCGGTCAAACCGGGGTCATTTTTTT
yidC(SL1344_3809)	InvR(ncRNA0023)	+	4067726	4067732	4067759	4067759	+	3067558	3067590	3067523	3067529	18	7.41986	3.55e-10	CDS	sRNA	AGAACACTAACGATGGATTCGCAACGCAATCTTT	TCTCTTACGTTGCATTTATCAATCTGCTTTTTGATACAGCAGCACCTCGCTGCTGCTTTTTTTATTTG
yieG(SL1344_3818)	RprA(ncRNA0058)	-	4079061	4079067	--	--	-	1401682	1401687	1401731	1401733	11	1364.27	1.24e-30	CDS	sRNA	ATTGTGTTTATTGACGCACACTGATGA	CGAATTGCTGTGTGTAGTCTTTGCCCGTCTCCTACGATGGGCTTTTTTTTTA
yifK(SL1344_3889)	CyaR(ncRNA0009)	+	4161419	4161447	4161484	4161488	+	2228927	2228932	2228863	2228875	10	39.3854	5.57e-13	CDS	sRNA	GTTTGCGATGATCAAAGTCACCACGATTATTGTGATGATCATCATCGGTCTGGGGGTGATTTTCTTCGGC	ATAAATGCTAGCTGTACCAGGAACCACCTCCTTGGCCTGCGTAATCTCCCTTACGCAGGCTTATTTTTTG
yifK(SL1344_3889)	GcvB(ncRNA0014)	+	4160891	4160974	4160951	4161018	+	3156846	3156912	3156846	3156855	57	267.86	1.51e-113	CDS	sRNA	ATTCGCAACAATCGATGTACCCATAACAATAACCGGTACTACCGGAACCGTTGCAAACACGACATGAGGATTTATGGCAGAGAAAAAACCGGAGCTACAGCGTGGGCTGGAAGCTCGTCATATTGAAT	GATGTTGTGTTGTTGTGTTTGCAATTGGTCTGCGATTCAGACCACGGTAGCGAGACTACCCTTTTTC
yifK(SL1344_3889)	GcvB(ncRNA0014)	+	4160897	4160939	4160950	4160963	+	3156913	3156986	3156843	3156856	245	230.029	0	5UTR	sRNA	AACAATCGATGTACCCATAACAATAACCGGTACTACCGGAACCGTTGCAAACACGACATGAGGATTT	TGTGATGTTGTGTTGTTGTGTTTGCAATTGGTCTGCGATTCAGACCACGGTAGCGAGACTACCCTTTTTCACTTCCTGTACATTTACCCTGTCTGTCCATAGTGATTAATGTAGCACCGCCATATTGCGGTGCTTTTTTTTGTA
yifK(SL1344_3889)	STnc870(ncRNA0205)	+	4160904	4160954	4160975	4160978	+	4292591	4292599	4292541	4292542	19	86.4151	3.59e-30	5UTR	sRNA	GATGTACCCATAACAATAACCGGTACTACCGGAACCGTTGCAAACACGACATGAGGATTTATGGCAGAGAAAAAA	TTTTCCTTGCCATAGACACCATCCCTGTCTTCCCCCACATGATGTGGGGGTTTTTTTTA
yihG(SL1344_3946)	InvR(ncRNA0023)	-	4227215	4227231	4227184	4227194	+	3067557	3067586	3067502	3067504	10	20.7754	6.89e-10	5UTR	sRNA	CCTTGCGCCCTTTTCGCGCACCGTTTATGGCTAACTTTTGAATAATTT	ACTTTTACGGTTGGCCATTTGTCTCTTACGTTGCATTTATCAATCTGCTTTTTGATACAGCAGCACCTCGCTGCTGCTTTTTTTA
yihV(SL1344_3970).AS	ArcZ(ncRNA0002)	-	4257116	4257145	4257081	4257085	+	3511913	3511918	3511860	3511861	34	2604.62	3.43e-77	Antisense	sRNA	GACAAGAAAGATCGGGTTTGCTCACAATCAGGGATACCCGCCCGGCCACCCGGGCGCGTACACTT	ATTTCCCTGGTGTTGGCGCAGTATTCGCGCACCCCGGTCAAACCGGGGTCATTTTTTTT
yijP(SL1344_4068)	ArcZ(ncRNA0002)	-	4355248	4355296	4355225	4355262	+	3511913	3511919	3511859	3511861	24	501.392	7.65e-49	CDS	sRNA	AATACAAGTTCCGCTATCCAGAAAACCAGGGCAAGTTTGATGGTAAAACCGACCATGTTCCGCCGGGATTAA	GATTTCCCTGGTGTTGGCGCAGTATTCGCGCACCCCGGTCAAACCGGGGTCATTTTTTTTC
yijP(SL1344_4068)	STnc870(ncRNA0205)	-	4356516	4356536	4356481	4356488	+	4292592	4292600	4292556	4292563	75	4127.41	2.98e-215	5UTR	sRNA	ATTCTTTTAAGGTTCAGGCGTTACGTTTGGCGCTACGATTAAAGACAGGCTCTCAT	ACACCATCCCTGTCTTCCCCCACATGATGTGGGGGTTTTTTTTAT
yjaB(SL1344_4116)	RprA(ncRNA0058)	-	4421427	4421434	4421380	4421392	-	1401682	1401687	1401731	1401732	21	1840.83	1.72e-59	3UTR	sRNA	TTTTACAGTTACCGCACACGCAAAAAAGCCCGTCCTGACGGACGGGCTTCTTCAC	GAATTGCTGTGTGTAGTCTTTGCCCGTCTCCTACGATGGGCTTTTTTTTTA
yjeH(SL1344_4265)	ArcZ(ncRNA0002)	-	4594904	4594911	4594879	4594879	+	3511916	3511919	3511861	3511863	12	76.5954	2.64e-18	CDS	sRNA	GATTGTCTTTGCTGTGCTGGGGCGTCACTTTCC	TTTCCCTGGTGTTGGCGCAGTATTCGCGCACCCCGGTCAAACCGGGGTCATTTTTTTTC
yjeH(SL1344_4265).AS	ArcZ(ncRNA0002)	+	4594037	4594067	4594096	4594100	+	3511913	3511919	3511860	3511862	33	1516.8	5.07e-73	Antisense	sRNA	TAGCATAGACGATCAGCGCATTGAGGTTAATCTTCAGGGCGTAGACGACCAGGGAACTCACGCA	ATTTCCCTGGTGTTGGCGCAGTATTCGCGCACCCCGGTCAAACCGGGGTCATTTTTTTTC
yjeQ(SL1344_4286)	ArcZ(ncRNA0002)	-	4615236	4615365	4615272	4615278	+	3511895	3511919	3511859	3511871	526	795.049	0	CDS	sRNA	CCCTTCAGAGGTCACATTCACTGTGACTATATTCATCTACAATTGCGTGTATCATAGATGTTTTGCCCACTATGGGCGACCAGGAGCCAGTACG	GATTTCCCTGGTGTTGGCGCAGTATTCGCGCACCCCGGTCAAACCGGGGTCATTTTTTTTC
ymiA(SL1344_1644A).acnA(SL1344_1644).IGR	RprA(ncRNA0058)	-	1764623	1764693	1764604	1764605	-	1401683	1401709	1401729	1401732	59	2100.78	4.69e-96	IGR	sRNA	TTTGCTGACGAGGTGTCACAAAAATAATATTCGTCTTTTTATTGGCGTTACTGTTTTATTAACGCTGTCTTATTACACCGCAGCAACCGT	GAATTGCTGTGTGTAGTCTTTGCCCGTCTCCTACGATGGGCTTTTTTTTT
yohJ(SL1344_2158)	STnc2000(ncRNA0278)	+	2275628	2275716	2275727	2275738	-	1204286	1204308	1204328	1204337	142	17800.3	3.11e-281	CDS	sRNA	GCTTTAAACATGAGTAAGTCACTGAATATTATCTGGCAATATATACGCGCTTTTGTATTGATTTATGCCTGTTTGTACGCAGGCATTTTTCTTGCATCACTGCTTCCTATC	AAAAAATGATATGCAGTGATGTATGTTTGCCGGGTCGCCCCGGCTTTTTTAT
yojI(SL1344_2233)	ArcZ(ncRNA0002)	-	2360075	2360112	2360028	2360028	+	3511914	3511917	3511859	3511863	11	180.545	4.26e-20	CDS	sRNA	TCTTATTCTTGTCTGGCGGCAGTACCGCTGGCCATTTATTAGCGTGATGGCGCTGAGCCTCGCCAGCGCGGCGCTGGGGATTGGC	GATTTCCCTGGTGTTGGCGCAGTATTCGCGCACCCCGGTCAAACCGGGGTCATTTTTTT
ypfM(SL1344_2444A)	ArcZ(ncRNA0002)	-	2594626	2594737	2594602	2594705	+	3511883	3511921	3511859	3511866	3456	3435.15	0	CDS	sRNA	CATAGACAGCATAACCAGAGGATATCGCAACAATCGGTTAAATGAACTTCTCTCTATACCGCTAACTACGTAGAATACCCATAATAATAAGAGAGGCTATTATGATTGAACGTGAACTGGGGAACTGGAAAGATTT	GATTTCCCTGGTGTTGGCGCAGTATTCGCGCACCCCGGTCAAACCGGGGTCATTTTTTTTCCG
ypfM(SL1344_2444A)	ArcZ(ncRNA0002)	-	2594533	2594605	2594553	2594553	+	3511913	3511919	3511860	3511861	14	19.8583	7.89e-14	3UTR	sRNA	ATTTTATCGAAGTCATGCTTCGTAAATAAATGCCTGGAAGGCACCGCGCTCCC	ATTTCCCTGGTGTTGGCGCAGTATTCGCGCACCCCGGTCAAACCGGGGTCATTTTTTTTC
ypfM(SL1344_2444A)	STnc440(ncRNA0162)	-	2594574	2594612	2594508	2594549	+	4580533	4580565	4580484	4580496	11	200.952	4.67e-22	3UTR	sRNA	TGGAAAGATTTTATCGAAGTCATGCTTCGTAAATAAATGCCTGGAAGGCACCGCGCTCCCATAGGGGATAAGAAAAGGCGACTCAACGAAAGTCGCCTTTTTTGT	AGTAACGGATTACTTTGTGGTGTAGCGTAACGGTAATTGTCCTCCTCATATTTGCGGCAGCGTAGTCTGCCGCTTTTTTTTA
yrdA(SL1344_3366).AS	ArcZ(ncRNA0002)	-	3594375	3594377	3594327	3594344	+	3511915	3511918	3511860	3511861	15	143.619	8.13e-26	Antisense	sRNA	CGCTTTCCAGCCGTTTGTGCTGCGGCACCAGGCTTCCCGCGCCAATCATTA	ATTTCCCTGGTGTTGGCGCAGTATTCGCGCACCCCGGTCAAACCGGGGTCATTTTTTTT
yrfF(SL1344_3462)	ArcZ(ncRNA0002)	+	3672453	3672480	3672508	3672518	+	3511913	3511918	3511809	3511860	76	286.411	9.91e-141	CDS	sRNA	CGAAAAGCGCGCTGCGGGAAATTCACTGTCTGCGGGGAACGCCCCGCCGCTGGGGACTGTTTGGGG	AAAACAGGACTGCGCCTTTGACATCATCATAATAAGCACGGCGCAGCCACGATTTCCCTGGTGTTGGCGCAGTATTCGCGCACCCCGGTCAAACCGGGGTCATTTTTTTT
yrfF(SL1344_3462)	ArcZ(ncRNA0002)	+	3671508	3671573	3671589	3671596	+	3511882	3511919	3511860	3511863	225	693.733	0	5UTR	sRNA	AGTCAATAGGTTGAAATAACTCCAGGAATTTGCTGATATTCCGTTTTTGGTGGTATTGCTATGATTTGCCTTCACTGGGATGCGCTTTA	ATTTCCCTGGTGTTGGCGCAGTATTCGCGCACCCCGGTCAAACCGGGGTCATTTTTTTTC
yshB(SL1344_3951A)	SL1344_3819(SL1344_3819)	-	4234021	4234087	4233987	4233991	+	4081301	4081305	4081266	4081266	25	8912.22	2.07e-88	3UTR	3UTR	TGGGACTGTTCAGCTGACAATGTGCCGGATGGCGCTAATGCTTATCCGGCCTACAGGTTGTCGCAACGTGTAGGCCTGGTAAGCGCAGCGCCACCGGGCAA	TGTAGGCCCGGTAAGCGCAGCGCCACCGGGCAAAAGAATG
ytfM(SL1344_4342)	ArcZ(ncRNA0002)	+	4666526	4666587	4666608	4666611	+	3511913	3511919	3511859	3511862	111	520.875	1.67e-221	5UTR	sRNA	GGGCAGTCGTCTGCTTTTCAATCGAAATTGTTGATTTTATGTTAAGCCGCGGAGCGGTAGTGTGATTTTTTCCAGGGGTGGGAATA	GATTTCCCTGGTGTTGGCGCAGTATTCGCGCACCCCGGTCAAACCGGGGTCATTTTTTTTC
ytfM(SL1344_4342)	ArcZ(ncRNA0002)	+	4666871	4666882	4666929	4666935	+	3511915	3511917	--	--	15	111.189	1.61e-24	CDS	sRNA	ATTCGACTTGCTTCCACCGCCTGCGAAAGGACGGCAGGTATTAATCGCCAGGGTTACGCCCGGCC	GGTCAAACCGGGGTCATTTTTTT
ytfM(SL1344_4342)	SdsR(ncRNA0070)	+	4666602	4666618	4666641	4666641	-	1925620	1925627	1925691	1925693	16	385.476	2.33e-35	5UTR	sRNA	GGTGGGAATAGGGGATATTCAGGAGAAAATGTGCCACATA	ACTTTTAGCGCACGGCTCTCTCCCAAGAGCCATTTCCCTGGACCGAATACAGGAATCGTATTCGGTCTCTTTTT
ytfM(SL1344_4342)	STnc870(ncRNA0205)	+	4666589	4666594	--	--	+	4292596	4292599	4292528	4292555	11	243.114	9.31e-23	5UTR	sRNA	GATTTTTTCCAGGGGTGGGAATAGGG	AGTAACAACCCTGTTTTCCTTGCCATAGACACCATCCCTGTCTTCCCCCACATGATGTGGGGGTTTTTTTTA
zwf(SL1344_1820)	FnrS(ncRNA0013)	-	1938729	1938800	1938678	1938761	-	1706782	1706784	1706843	1706898	15	16.2825	3.33e-13	CDS	sRNA	CCGTAATCTCGTAAAAGCAGTACAGTGCTGTGTAATAAAATTACAACGATATCCTGGCTAAAGTACCAGGAGATTAACTAAGGAGAATGACATGGCGGTAACGCAAACAGCCCAGGCATGTGA	GAATGCAACGTCAAGCGATGGGCGTTGCGCTCCATATTGTCTTACTTCCTTTTTTGAATTACTGCATAGCACAATTGATTCGTACGACGCCGACTTAGATTAGTCGGCTTTTTTTTG
zwf(SL1344_1820)	MicF(ncRNA0046)	-	1938727	1938762	1938694	1938696	+	2364716	2364722	--	--	16	232.287	5.83e-32	CDS	sRNA	AATTACAACGATATCCTGGCTAAAGTACCAGGAGATTAACTAAGGAGAATGACATGGCGGTAACGCAAA	GGATGCTTCGCATTCGGTTTTTTTTAC

## Sheet: OD2.0+3h
RNA1 name	RNA2 name	RNA1 Strand	RNA1 from	RNA1 to	RNA1 ligation from	RNA1 ligation to	RNA2 Strand	RNA2 from	RNA2 to	RNA2 ligation from	RNA2 ligation to	Number of interactions	Odds Ratio	Fisher's exact test p-value	RNA1 type	RNA2 type	RNA1 seq	RNA2 seq
aas(SL1344_2988)	SdsR(ncRNA0070)	-	3189614	3189680	3189577	3189649	-	1925619	1925621	1925685	1925693	18	7.47903	1.42e-09	CDS	sRNA	GGTTTTGTGCAGATTCAGGGGCGCGCGAAACGCTTTGCGAAAATTGCTGGCGAAATGGTCTCGCTGGAGATGGTCGAGCAACTGGCGCTTGGCGTTTCGGCGGA	ACTTTTAGCGCACGGCTCTCTCCCAAGAGCCATTTCCCTGGACCGAATACAGGAATCGTATTCGGTCTCTTTTTA
abc(SL1344_0248)	SdsR(ncRNA0070)	-	288015	288029	287978	287994	-	1925620	1925623	1925690	1925697	42	32.7213	7.95e-38	CDS	sRNA	AATATTACCAAAGTGTTCCAGCAGGGGACGCGCACCATTCAGGCGCTAAATA	GCCAACTTTTAGCGCACGGCTCTCTCCCAAGAGCCATTTCCCTGGACCGAATACAGGAATCGTATTCGGTCTCTTTTT
ackA(SL1344_2306)	RybD(ncRNA0062)	+	2445528	2445645	2445658	2445668	+	807423	807433	807389	807395	295	5641.13	0	5UTR	sRNA	ATTTCTTCCATCATGCCCAAAAAAACTCCTGCGCATGATGTTAATCATAAATGTCAGGGCTATCATGCGCTACGCTCTATGGCTCACTGACGTTTTTTTAGCCACGTATCATAAATAGGTACTTCCATGTCGAGTAAGTTA	CCGTTTTCGACATGGTTGGCCACCTTTACGGTGGCCTTTTTTATG
ackA(SL1344_2306)	RprA(ncRNA0058)	+	2445445	2445486	2445494	2445521	-	1401682	1401685	1401731	1401734	10	108.43	3.96e-16	5UTR	sRNA	TAGTTTAAAATCATTGAGTCGTCAATATTACACATAGTATGCCATTGGCTGAAAAATACGCAAAATGGCATAGACTC	ACGAATTGCTGTGTGTAGTCTTTGCCCGTCTCCTACGATGGGCTTTTTTTTTA
ackA(SL1344_2306)	RprA(ncRNA0058)	+	2446111	2446187	2446207	2446216	-	1401683	1401687	1401729	1401732	14	58.7632	3.01e-19	CDS	sRNA	TCCATCAGACCATGCCGGAAGAATCTTACCTGTATGCCCTGCCGTACAGCCTGTATAAAGAACACGGCGTTCGTCGCTATGGCGCACACGGCACCAGCCACTTCTA	GAATTGCTGTGTGTAGTCTTTGCCCGTCTCCTACGATGGGCTTTTTTTTT
ackA(SL1344_2306).AS	RprA(ncRNA0058)	-	2445699	2445706	2445676	2445676	-	1401682	1401708	1401729	1401733	52	173.511	8.69e-66	Antisense	sRNA	AATTTCAGTGAAGAACTACCGCAGTTCAGAA	CGAATTGCTGTGTGTAGTCTTTGCCCGTCTCCTACGATGGGCTTTTTTTTTA
acnB(SL1344_0159)	ArcZ(ncRNA0002)	+	185854	185880	185899	185917	+	3511914	3511918	3511861	3511862	39	16.2355	1.54e-30	CDS	sRNA	GCTAGAAGAATACCGTAAGCACGTAGCTGAGCGTGCTGCCCAGGGGATTGTGCCAAAACCTTTA	TTTCCCTGGTGTTGGCGCAGTATTCGCGCACCCCGGTCAAACCGGGGTCATTTTTTTT
acnB(SL1344_0159)	SdsR(ncRNA0070)	+	185792	185870	185858	185919	-	1925618	1925672	1925690	1925701	47	9.76446	1.94e-26	CDS	sRNA	AGAGAATCGCCCATCAACAAAAGCGCCGCATTATGACAATGAGAGCGAGGAGATATCGTCGTGCTAGAAGAATACCGTAAGCACGTAGCTGAGCGTGCTGCCCAGGGGATTGTGCCAAAACCTTTAGA	TAATGCCAACTTTTAGCGCACGGCTCTCTCCCAAGAGCCATTTCCCTGGACCGAATACAGGAATCGTATTCGGTCTCTTTTTAT
acnB(SL1344_0159)	STnc870(ncRNA0205)	+	185795	185868	185842	185916	+	4292592	4292599	4292550	4292556	11	11.0055	1.53e-08	CDS	sRNA	GAATCGCCCATCAACAAAAGCGCCGCATTATGACAATGAGAGCGAGGAGATATCGTCGTGCTAGAAGAATACCGTAAGCACGTAGCTGAGCGTGCTGCCCAGGGGATTGTGCCAAAACCTTT	CCATAGACACCATCCCTGTCTTCCCCCACATGATGTGGGGGTTTTTTTTA
acpP(SL1344_1133)	MgrR(ncRNA0043)	+	1236143	1236162	1236174	1236186	+	1550824	1550844	1550765	1550767	11	17.5248	1.24e-10	5UTR	sRNA	AATAACGTAAAATCGTGGTAAGACCTGCCGGGATTTAGTTGCAA	ATTTGCCCGGTAGCGTATAAGCAAAACACAAATCTATCCATGCAAGCATTTACCGCTGGTGAACCGGCGGTTTTTTTTTG
acpP(SL1344_1133)	ArcZ(ncRNA0002)	+	1236416	1236468	1236492	1236495	+	3511884	3511912	3511859	3511863	35	8.78574	2.48e-21	CDS	sRNA	ATTCCGGACGAAGAAGCTGAGAAAATCACCACCGTTCAGGCTGCCATTGATTACATCAACGGCCACCAGGCGTAAGTGAA	GATTTCCCTGGTGTTGGCGCAGTATTCGCGCACCCCGGTCAAACCGGGGTCATT
acpP(SL1344_1133)	RprA(ncRNA0058)	+	1236411	1236464	1236458	1236494	-	1401688	1401708	1401730	1401732	21	4.70676	1.3e-08	CDS	sRNA	CTGAGATTCCGGACGAAGAAGCTGAGAAAATCACCACCGTTCAGGCTGCCATTGATTACATCAACGGCCACCAGGCGTAAGTGA	GAATTGCTGTGTGTAGTCTTTGCCCGTCTCCTACGATGGGCTTTT
acpP(SL1344_1133)	ArcZ(ncRNA0002)	+	1236402	1236478	1236458	1236527	+	3511913	3511919	3511859	3511866	702	12.5885	0	3UTR	sRNA	AGTTTGATACTGAGATTCCGGACGAAGAAGCTGAGAAAATCACCACCGTTCAGGCTGCCATTGATTACATCAACGGCCACCAGGCGTAAGTGAACATCTCCAGGCGGTCGTTCGACCGCCTGAGTT	GATTTCCCTGGTGTTGGCGCAGTATTCGCGCACCCCGGTCAAACCGGGGTCATTTTTTTTC
acpP(SL1344_1133)	RyeF(ncRNA0065)	+	1236230	1236247	1236269	1236410	-	1958510	1958533	1958557	1958593	48	1530.9	1.34e-129	CDS	sRNA	AGTTTTGATAGGAAATTTAAGAGTATGAGCACTATCGAAGAACGCGTTAAGAAAATTATCGGCGAACAGCTGGGCGTTAAGCAGGAAGAAGTAACCAACAATGCTTCTTTCGTTGAAGACCTGGGCGCAGATTCTCTTGACACCGTTGAGCTGGTAATGGCTCTGGAAGAAGAGTTTGATA	TGATTTTTACCGTTGCATCATGTCGCCCAATATGATGCTTGCTCGTACCAGGCCCCTGCCAATTCAACAGGGGCCTTTTTTTCT
acrB(SL1344_0468)	ArcZ(ncRNA0002)	-	530937	530956	530915	530916	+	3511913	3511918	3511860	3511864	96	126.349	4.12e-127	CDS	sRNA	CTGAAAAAAATGGAACCGTTCTTCCCGCCAGGGATGAAAATC	ATTTCCCTGGTGTTGGCGCAGTATTCGCGCACCCCGGTCAAACCGGGGTCATTTTTTTT
acrB(SL1344_0468).SL1344_0467(SL1344_0467).IGR	RprA(ncRNA0058)	-	528408	528510	528383	--	-	1401681	1401714	1401726	1401741	507	460.911	0	IGR	sRNA	TAGCCTGAAAAGCTAAAAAACGTTAACCCAATGATTACACAAACAATAAAACTGGTTCCTTTTTAGGCGACCGACGATCACTGTTAAAATTCGAAAAAGTATGGCAACACGCGGCTTTCACGCAATTG	TGAAACAACGAATTGCTGTGTGTAGTCTTTGCCCGTCTCCTACGATGGGCTTTTTTTTTAA
acs(SL1344_4211).SL1344_4210(SL1344_4210).IGR	STnc870(ncRNA0205)	-	4534879	4534899	4534823	4534867	+	4292569	4292600	4292540	4292556	50	42.8858	3.83e-59	IGR	sRNA	GGATTTCGTGTTACAGGAAGGCGGCAAGCGAGCACACCCTCAGCAGCATAGTTCAAGTTCACTATGTGGCTGGGGCG	GTTTTCCTTGCCATAGACACCATCCCTGTCTTCCCCCACATGATGTGGGGGTTTTTTTTAT
add(SL1344_1395)	SdsR(ncRNA0070)	-	1495366	1495378	1495343	1495346	-	1925618	1925671	1925685	1925708	124	40.6783	9.71e-115	5UTR	sRNA	GCGCACTTTTATTAAAAATTGAGTGCGCCCATGATT	CCTGCATTAATGCCAACTTTTAGCGCACGGCTCTCTCCCAAGAGCCATTTCCCTGGACCGAATACAGGAATCGTATTCGGTCTCTTTTTAT
add(SL1344_1395)	RprA(ncRNA0058)	-	1494617	1494652	1494576	1494584	-	1401683	1401686	1401731	1401734	10	8.18338	8.84e-07	CDS	sRNA	GATTTTCTTGCACAGCAGCGTATCGGTATTGAATCCTGTCTGACCTCGAATATTCAGACCAGTACCGTCGCATCGCT	ACGAATTGCTGTGTGTAGTCTTTGCCCGTCTCCTACGATGGGCTTTTTTTTT
adh(SL1344_1680)	RprA(ncRNA0058)	+	1800572	1800575	1800605	1800605	-	1401681	1401687	1401727	1401733	24	48.0459	3e-30	CDS	sRNA	TGGTTAAAGCTGCATACAGCTCCGGTAAACCGGC	CGAATTGCTGTGTGTAGTCTTTGCCCGTCTCCTACGATGGGCTTTTTTTTTAA
adhC(SL1344_1557)	ArcZ(ncRNA0002)	-	1674580	1674587	--	--	+	3511914	3511917	3511860	3511862	27	12.8081	1.93e-19	CDS	sRNA	GCCTTTGAACTGATGCATCAGGGTAAAT	ATTTCCCTGGTGTTGGCGCAGTATTCGCGCACCCCGGTCAAACCGGGGTCATTTTTTT
adhP(SL1344_1497).AS	RprA(ncRNA0058)	-	1605681	1605707	1605651	1605661	-	1401683	1401709	1401731	1401731	38	237.979	9.45e-37	Antisense	sRNA	CGCCTTGTTTTCATCTGCTGTCTGTATACTCAGACGACCACAGCAAATCGTTTAACG	AATTGCTGTGTGTAGTCTTTGCCCGTCTCCTACGATGGGCTTTTTTTTT
adi(SL1344_4233).AS	ArcZ(ncRNA0002)	+	4559925	4559934	4559959	4559959	+	3511916	3511918	3511860	3511862	12	244.773	3.06e-18	Antisense	sRNA	ATTATTGTTTTGCAGCAATACTCAGGGAATACATG	ATTTCCCTGGTGTTGGCGCAGTATTCGCGCACCCCGGTCAAACCGGGGTCATTTTTTTT
agp(SL1344_1056)	STnc870(ncRNA0205)	+	1159993	1160040	1160030	1160065	+	4292565	4292600	4292538	4292561	54	1702.18	9.9e-109	CDS	sRNA	GATTTGATAACAACAAGAGGTCATAGGGATGAAAAAATCATTACTCGCTGTTGCTGTGGCAGGGGCTGTTTTG	CTGTTTTCCTTGCCATAGACACCATCCCTGTCTTCCCCCACATGATGTGGGGGTTTTTTTTAT
agp(SL1344_1056).AS	ArcZ(ncRNA0002)	-	1161158	1161194	--	--	+	3511915	3511917	3511860	3511863	12	24.4772	5.09e-12	Antisense	sRNA	GACATCCTTTCAGTTCCAGGGTTACCCTTTGCGCGGGCGATTTGAGCGTTAACGCTT	ATTTCCCTGGTGTTGGCGCAGTATTCGCGCACCCCGGTCAAACCGGGGTCATTTTTTT
ais(SL1344_2265).AS	ArcZ(ncRNA0002)	+	2401442	2401444	--	--	+	3511914	3511917	3511859	3511863	11	64.107	4.01e-14	Antisense	sRNA	AAATTCCGCAACGGAAGACCAGG	GATTTCCCTGGTGTTGGCGCAGTATTCGCGCACCCCGGTCAAACCGGGGTCATTTTTTT
alaS(SL1344_2807)	SdsR(ncRNA0070)	-	2993925	2993956	2993898	2993913	-	1925620	1925622	1925690	1925719	26	3.44778	3.87e-07	3UTR	sRNA	AATTGCAATAATTATAAGCGTTCGTTGGCGCCGCAGCCCGTGCTGCGGCGTTTACGTCA	AGGCGATTTAGCCTGCATTAATGCCAACTTTTAGCGCACGGCTCTCTCCCAAGAGCCATTTCCCTGGACCGAATACAGGAATCGTATTCGGTCTCTTTTT
alaS(SL1344_2807)	STnc870(ncRNA0205)	-	2994014	2994092	2993983	2994006	+	4292574	4292601	4292540	4292556	23	26.1226	7.65e-24	CDS	sRNA	GGGGAATTGATTGGGATGGTCGCTCAGCAGGTGGGCGGTAAGGGTGGCGGTCGTCCGGACATGGCGCAAGCCGGTGGTACGGATGCGGCAGCTCTGCCTGCAGCGTTAGC	GTTTTCCTTGCCATAGACACCATCCCTGTCTTCCCCCACATGATGTGGGGGTTTTTTTTATC
amiA(SL1344_2413)	STnc870(ncRNA0205)	+	2558289	2558349	2558376	2558380	+	4292592	4292599	4292556	4292561	28	196.114	3e-47	CDS	sRNA	AACACGTCGTACTGGCAATTGCCAAAAACGTGCGCGCTATTTTGCGAAATCACGGAATCGATGCGCGTTTAACCCGGACAGGGGATACTTTT	ACACCATCCCTGTCTTCCCCCACATGATGTGGGGGTTTTTTTTA
amiA(SL1344_2413)	ArcZ(ncRNA0002)	+	2558029	2558078	2558095	2558100	+	3511915	3511917	3511860	3511862	17	11.0083	6.66e-12	CDS	sRNA	TTTTCACAACTCAGGCCGTATGAGCACTTTTAAACTCCTAAAAACTCTCACATCGCGCCGCCAGGTACTCAA	ATTTCCCTGGTGTTGGCGCAGTATTCGCGCACCCCGGTCAAACCGGGGTCATTTTTTT
amiA(SL1344_2413)	RprA(ncRNA0058)	+	2558095	2558162	2558158	2558194	-	1401682	1401687	1401731	1401733	10	81.3227	3.17e-15	CDS	sRNA	ACTCAAAACAGGTCTGGCGGCCCTGACGCTGTCAGGTATGTCGCACGCAGTAGCCAAAGAAGAAACGCTAAAAACCAGTAATGGTCACAGCAAACCCAAA	CGAATTGCTGTGTGTAGTCTTTGCCCGTCTCCTACGATGGGCTTTTTTTTTA
ampG(SL1344_0438)	ArcZ(ncRNA0002)	-	498864	498865	--	--	+	3511915	3511918	3511861	3511862	10	16.3181	6.52e-09	CDS	sRNA	GCTTTATAAACTGGGGGACGCC	TTTCCCTGGTGTTGGCGCAGTATTCGCGCACCCCGGTCAAACCGGGGTCATTTTTTTT
ampG(SL1344_0438).AS	RprA(ncRNA0058)	+	498137	498152	--	--	-	1401688	1401692	1401731	1401732	10	1325.77	1.8e-25	Antisense	sRNA	ACAATGCCGCACACGGCAACCACTACCGCAGTCTCA	GAATTGCTGTGTGTAGTCTTTGCCCGTCTCCTACGATGGGCTTTT
ansA(SL1344_1229)	ArcZ(ncRNA0002)	-	1328731	1328740	--	--	+	3511915	3511917	3511859	3511862	16	43.5154	2.46e-18	CDS	sRNA	GCATTATTTGTTAAGCCAGGGTCTGGACAC	GATTTCCCTGGTGTTGGCGCAGTATTCGCGCACCCCGGTCAAACCGGGGTCATTTTTTT
ansP(SL1344_1515)	RprA(ncRNA0058)	+	1627492	1627507	1627524	1627533	-	1401682	1401687	1401727	1401733	35	379.548	3.64e-64	CDS	sRNA	GGTAACGTAATGAAAACACAGACTACGCACGCCGCAGAACAA	CGAATTGCTGTGTGTAGTCTTTGCCCGTCTCCTACGATGGGCTTTTTTTTTA
apA(SL1344_1622)	ArcZ(ncRNA0002)	+	1741391	1741402	1741423	1741428	+	3511915	3511918	3511860	3511862	26	42.4281	9.82e-29	CDS	sRNA	GCGTTTACGTCTGACGTTGCGCCCGGGGATGAATATCG	ATTTCCCTGGTGTTGGCGCAGTATTCGCGCACCCCGGTCAAACCGGGGTCATTTTTTTT
apaH(SL1344_0089)	ArcZ(ncRNA0002)	-	102095	102102	--	--	+	3511913	3511920	3511856	3511861	18	12.6607	2.19e-13	CDS	sRNA	GCGTGCGTTTGGTGCTGGGGAATCACGA	CACGATTTCCCTGGTGTTGGCGCAGTATTCGCGCACCCCGGTCAAACCGGGGTCATTTTTTTTCC
aphA(SL1344_4185)	ArcZ(ncRNA0002)	+	4491915	4491952	4491974	4491976	+	3511916	3511917	3511860	3511861	16	28.3796	2.58e-16	5UTR	sRNA	GTTTTTTGAGCAAAGACTCATCTTAATAATTATAATATTTTGAATTTTAAGGGAAAACCATG	ATTTCCCTGGTGTTGGCGCAGTATTCGCGCACCCCGGTCAAACCGGGGTCATTTTTTT
aphA(SL1344_4185).AS	ArcZ(ncRNA0002)	-	4492000	4492201	4491976	4492149	+	3511913	3511917	3511860	3511861	23	88.3902	2e-17	Antisense	sRNA	AAATAACACGGTGTCGTCAATATCAAAGCCGACCGCCATCGGCGGGCGTCCGGTGAGGCTGTTTTCAATCTGGGCGACAGAGACCCAATGGACAGGCGCTTGTTCCGCGAGTTTTGCAACATTAGTGCCCGGATTGAGCGTCGAAGGGGAAGATACTAACGCATTCGCGGAATGGTTTAGCGTAAACAACAAACAGACGGCACTCAGCGCCAGGGTTATTTTTTTC	ATTTCCCTGGTGTTGGCGCAGTATTCGCGCACCCCGGTCAAACCGGGGTCATTTTTTT
apt(SL1344_0476)	RprA(ncRNA0058)	+	539626	539756	539659	539778	-	1401681	1401708	1401719	1401739	975	609.021	0	CDS	sRNA	CGTTTTCGAGCACAGGCGCAGGCGGTCAAAGAGTAACCGAGCGTTACCCCTGACCGAAAAGTATTGCGCCGTGAGTAACACCGTACTTAGCAGGCATATATCCATGACCGCGACTGCACAGCAGCTTGAGTTTCTCAAAAACAGCATCAAAAG	AAACAACGAATTGCTGTGTGTAGTCTTTGCCCGTCTCCTACGATGGGCTTTTTTTTTAA
araA(SL1344_0102)	RprA(ncRNA0058)	-	119214	119412	119147	119397	-	1401681	1401708	1401721	1401738	132	8.55412	1.24e-31	CDS	sRNA	CGGATGAGATTACCGCCATTTGTCGTGACGCCAATTATGACGATCGCTGCGCAGGGCTGGTGGTCTGGCTGCACACCTTCTCCCCGGCCAAAATGTGGATCAACGGGCTGAGTATCCTTAACAAACCACTACTGCAATTCCATACCCAATTTAACGCCGCCCTGCCGTGGGACAGCATTGATATGGACTTTATGAACCTGAACCAGACTGCGCACGGCGGTCGTGAGTTCGGTTTTATCGGCGCGCGGATGCGCCAGCAGCACGCG	AACAACGAATTGCTGTGTGTAGTCTTTGCCCGTCTCCTACGATGGGCTTTTTTTTTAA
araB(SL1344_0103)	STnc870(ncRNA0205)	-	121213	121331	121104	121293	+	4292563	4292600	4292538	4292557	407	206.418	0	CDS	sRNA	CATACCTGTTTTTCTGGATGGAGTAAGACGATGGCAATTGCAATTGGCCTCGATTTTGGCAGTGATTCAGTGCGCGCTCTGGCAGTGGACTGCGCCACCGGCGACGAGATCGCCACCAGCGTAGAGTGGTATCCGCGCTGGCAAGAAGGCCGTTATTGCGACGGCCCGAACAACCAGTTCCGTCATCATCCGCGCGACTACATGGAGTCAATGGAGGCCGCGCTGAAA	CTGTTTTCCTTGCCATAGACACCATCCCTGTCTTCCCCCACATGATGTGGGGGTTTTTTTTAT
araB(SL1344_0103).araA(SL1344_0102).IGR	STnc2030(ncRNA0280)	-	119599	119610	119575	119575	+	1784721	1784727	1784676	1784687	12	41.6162	5.78e-16	IGR	sRNA	GGCAATCCTGACTCATTAAGGACACGACAATGACGA	AAAATCCGTGTGTCATGTCCTTTTTTGACCCCGCCTGGCGGGGTCTTTTTTC
araC(SL1344_0104)	STnc870(ncRNA0205)	+	121592	121598	--	--	+	4292578	4292599	4292540	4292542	15	20.78	9.11e-15	5UTR	sRNA	TCGATATGGACAATTTGTTTCTTCTCT	GTTTTCCTTGCCATAGACACCATCCCTGTCTTCCCCCACATGATGTGGGGGTTTTTTTTA
araC(SL1344_0104)	ArcZ(ncRNA0002)	+	122417	122434	122454	122454	+	3511913	3511918	3511860	3511863	86	33.1015	3.86e-85	CDS	sRNA	TCTATTTTTCGCGGGTATTTAAAAAATGCACCGGGGCA	ATTTCCCTGGTGTTGGCGCAGTATTCGCGCACCCCGGTCAAACCGGGGTCATTTTTTTT
araC(SL1344_0104)	RprA(ncRNA0058)	+	122221	122229	--	--	-	1401683	1401685	1401731	1401732	12	8.8716	3.19e-08	CDS	sRNA	CATTTTGATATCGCCAGCGTCGCCCAGCA	GAATTGCTGTGTGTAGTCTTTGCCCGTCTCCTACGATGGGCTTTTTTTTT
araD(SL1344_0101)	RfrA(ncRNA0055)	-	117920	117948	117897	117905	-	3736721	3736730	3736767	3736775	13	41.5098	3.64e-17	CDS	sRNA	GGAGAAAACAATGTTAGAAGATCTCAAACGCCAGGTACTGGAAGCTAATCTG	TTGCTCACATTGCTTCCAGTATTATTTTGGCCAGCTTTTGCTGGCTTTTTTTTTG
araD(SL1344_0101)	RfrB(ncRNA0056)	-	117920	117949	117883	117916	-	1309726	1309756	1309774	1309784	33	48.0816	3.84e-43	CDS	sRNA	GGGAGAAAACAATGTTAGAAGATCTCAAACGCCAGGTACTGGAAGCTAATCTGGCGCTGCCAAAACA	ACATTGCTCACATTGCTTCCAGTATTATTTGCCCGCCTCACCGAGTGCGGGCTTTTTTT
araE(SL1344_2994)	CsrB(ncRNA0007)	-	3198541	3198600	3198540	3198540	-	3138161	3138162	--	--	11	53.6988	5.83e-16	CDS	sRNA	TCTGCAGCGGTAGCGGGACTGTTATTTGGTCTGGATATCGGCGTTATCGCCGGGGCGCTGC	TTTATACAGTGCTCCCTTTTTT
araE(SL1344_2994)	ArcZ(ncRNA0002)	-	3197816	3197866	3197792	3197801	+	3511915	3511918	3511860	3511861	50	2.13817	1.72e-06	CDS	sRNA	CGGCATGAACATCATTATGTACTATGCGCCGCGCATTTTTAAAATGGCCGGCTTTACCACCACGGAACAGCAAAT	ATTTCCCTGGTGTTGGCGCAGTATTCGCGCACCCCGGTCAAACCGGGGTCATTTTTTTT
araJ(SL1344_0389)	CyaR(ncRNA0009)	-	445514	445607	445378	445553	+	2228902	2228933	2228861	2228900	94	21.7942	3.74e-44	CDS	sRNA	GTGACAATTCACAGCCACAGCGCGCAACATGCGCCTTTATTTTCGGCAGGTGGTATGAAAAAAGTTATTTTTTCTTTGGCGCTGGGTACGTTCGGACTGGGGATGGCCGAGTTTGGCATTATGGGCGTGCTGACGGAGCTGGCACGCGATGTCGGGATAACAATTCCCGCCGCCGGGCATATGATCTCGTTTTACGCCTTCGGCGTCGTGCTGGGCGCGCCTGTTATGGC	CCATAAATGCTAGCTGTACCAGGAACCACCTCCTTGGCCTGCGTAATCTCCCTTACGCAGGCTTATTTTTTGC
araJ(SL1344_0389)	STnc870(ncRNA0205)	-	444820	445619	444791	445556	+	4292552	4292602	4292502	4292564	1427	132.356	0	CDS	sRNA	CGTTGATTGGCTGTGACAATTCACAGCCACAGCGCGCAACATGCGCCTTTATTTTCGGCAGGTGGTATGAAAAAAGTTATTTTTTCTTTGGCGCTGGGTACGTTCGGACTGGGGATGGCCGAGTTTGGCATTATGGGCGTGCTGACGGAGCTGGCACGCGATGTCGGGATAACAATTCCCGCCGCCGGGCATATGATCTCGTTTTACGCCTTCGGCGTCGTGCTGGGCGCGCCTGTTATGGCGCTCTTTTCCAGCCGCTTTTCGCTTAAACATATACTGTTGTTTCTGGTCATGTTGTGCGTGATGGGCAATGCCATATTTACCTTTTCCTCGTCATATCTGATGCTCGCCGTCGGCAGACTGGTTTCCGGCTTTCCGCACGGTGCCTTTTTTGGCGTC…	ATTGAGTAGTAGCAACTCACGTTCCCAGTAACAACCCTGTTTTCCTTGCCATAGACACCATCCCTGTCTTCCCCCACATGATGTGGGGGTTTTTTTTATCT
arcB(SL1344_3300)	ArcZ(ncRNA0002)	-	3512614	3512649	3512592	3512592	+	3511913	3511918	3511861	3511862	20	31.3814	1.16e-20	CDS	sRNA	AGATATTGAACTGAACGTGATCGTGGCGCGTTCGGTACTGGAAAAACTGGGGAACAGC	TTTCCCTGGTGTTGGCGCAGTATTCGCGCACCCCGGTCAAACCGGGGTCATTTTTTTT
arcB(SL1344_3300)	SdsR(ncRNA0070)	-	3512303	3512329	3512272	3512280	-	1925620	1925666	1925688	1925701	22	18.6975	2.48e-09	CDS	sRNA	TTAAAAAATTCTGGGATGCCACCGATAAAGAGGAGAGTACCGTGACGCCTGAAGAGAG	TAATGCCAACTTTTAGCGCACGGCTCTCTCCCAAGAGCCATTTCCCTGGACCGAATACAGGAATCGTATTCGGTCTCTTTTT
arcB(SL1344_3300).SL1344_3299(SL1344_3299).IGR	RprA(ncRNA0058)	-	3511810	3511876	3511787	--	-	1401683	1401708	1401729	1401733	65	262.111	3.28e-58	IGR	sRNA	GCCAACACCAGGGAAATCGTGGCTGCGCCGTGCTTATTATGATGATGTCAAAGGCGCAGTCCTGTTTTCAGGCCGCACGCAGTTAAGATA	CGAATTGCTGTGTGTAGTCTTTGCCCGTCTCCTACGATGGGCTTTTTTTTT
argA(SL1344_2970)	SdsR(ncRNA0070)	+	3164275	3164285	3164308	3164308	-	1925620	1925623	1925690	1925695	22	82.2696	2.1e-24	5UTR	sRNA	GAATAATAATTCACTAGTGGGGCGCGCAATGATA	CAACTTTTAGCGCACGGCTCTCTCCCAAGAGCCATTTCCCTGGACCGAATACAGGAATCGTATTCGGTCTCTTTTT
argD(SL1344_1238)	STnc870(ncRNA0205)	+	1339050	1339074	1339096	1339096	+	4292591	4292599	4292541	4292556	14	126.065	1.27e-22	CDS	sRNA	CTCTGTCAGTTACGCGCGAAAACTTTGATGAATGGATGGTGCCGGTA	TTTTCCTTGCCATAGACACCATCCCTGTCTTCCCCCACATGATGTGGGGGTTTTTTTTA
argD(SL1344_1238)	SdsR(ncRNA0070)	+	1339655	1339660	--	--	-	1925618	1925621	1925681	1925695	15	40.0662	4.65e-15	CDS	sRNA	GCTTTTTTGCAGGGGCTGCGTGAATT	CAACTTTTAGCGCACGGCTCTCTCCCAAGAGCCATTTCCCTGGACCGAATACAGGAATCGTATTCGGTCTCTTTTTAT
argD(SL1344_3435)	STnc870(ncRNA0205)	-	3641164	3641193	3641144	3641163	+	4292576	4292600	4292541	4292552	15	157.582	4.38e-25	5UTR	sRNA	ATTTCACTGGCATTTCTACTTAACCGGGTGGTAATGATATGGCAACTGAA	TTTTCCTTGCCATAGACACCATCCCTGTCTTCCCCCACATGATGTGGGGGTTTTTTTTAT
argR(SL1344_3332)	ArcZ(ncRNA0002)	+	3549738	3549769	3549794	3549803	+	3511914	3511917	3511859	3511866	16	36.2628	1.69e-17	CDS	sRNA	ATTCATACCAGCCCCGGCGCGGCACAACTCATTGCACGCCTGCTGGATTCACTGGGGAAAGCAGAA	GATTTCCCTGGTGTTGGCGCAGTATTCGCGCACCCCGGTCAAACCGGGGTCATTTTTTT
aroA(SL1344_0915).AS	ArcZ(ncRNA0002)	-	1020432	1020488	1020429	1020433	+	3511914	3511917	3511860	3511862	40	125.529	8.84e-54	Antisense	sRNA	AAGACTTAGGCAGGCGTACTCATTCGCGCCAGTTGTTCGAAATAATCAGGGAACGTTTTT	ATTTCCCTGGTGTTGGCGCAGTATTCGCGCACCCCGGTCAAACCGGGGTCATTTTTTT
aroB(SL1344_3453)	STnc870(ncRNA0205)	-	3662936	3662946	3662899	3662904	+	4292593	4292598	4292556	4292556	10	18.8154	6.19e-10	CDS	sRNA	CCTTTGGCCACGCCATTGAAGCGGAAATGGGATATGGCAATTGGTTAC	ACACCATCCCTGTCTTCCCCCACATGATGTGGGGGTTTTTTTT
aroB(SL1344_3453).damX(SL1344_3452).IGR	STnc870(ncRNA0205)	-	3662521	3662554	3662492	3662500	+	4292586	4292600	4292540	4292556	25	101.67	1.1e-37	IGR	sRNA	GCTTCAGGTTATGTGCAATGTCGTAAGCATTAACCTTTGAGTGGGGTGTTAAATGGATGAATT	GTTTTCCTTGCCATAGACACCATCCCTGTCTTCCCCCACATGATGTGGGGGTTTTTTTTAT
aroD(SL1344_1292)	ArcZ(ncRNA0002)	-	1396487	1396494	1396463	1396463	+	3511913	3511917	3511860	3511861	15	152.984	1.71e-21	CDS	sRNA	TATTAACTATATTGCACCAGGCGTAATACTTT	ATTTCCCTGGTGTTGGCGCAGTATTCGCGCACCCCGGTCAAACCGGGGTCATTTTTTT
aroD(SL1344_1292)	STnc870(ncRNA0205)	-	1397341	1397382	1397318	1397346	+	4292576	4292599	4292540	4292562	29	914.033	3.82e-57	5UTR	sRNA	ATTGATGGTTACGGCATGTTGTTATGGCAAGGAGCCGAACAGTTTGAACTGTGGACAGGAAAAGC	GTTTTCCTTGCCATAGACACCATCCCTGTCTTCCCCCACATGATGTGGGGGTTTTTTTTA
aroE(SL1344_3368)	RprA(ncRNA0058)	-	3595538	3595575	3595512	3595525	-	1401681	1401708	1401725	1401738	208	164.48	2.43e-232	CDS	sRNA	GGGTAATATGATGGAAACCTATGCTGTTTTTGGAAATCCGATTGCGCACAGCAAATCGCCATTT	AACAACGAATTGCTGTGTGTAGTCTTTGCCCGTCTCCTACGATGGGCTTTTTTTTTAA
aroF(SL1344_2628)	ArcZ(ncRNA0002)	-	2812299	2812399	2812270	2812282	+	3511913	3511919	3511861	3511866	30	26.5171	3.08e-13	CDS	sRNA	AAAAACGGCACGGATGGCAGCCTGGCGACAGCGATTAACGCCATGCGCGCCGCTGCGCAACCTCATCGTTTTGTTGGCATTAACCAGGCCGGTCAGGTTGCGTTATTGCAAACCCAGGGAAATCCGCATG	TTTCCCTGGTGTTGGCGCAGTATTCGCGCACCCCGGTCAAACCGGGGTCATTTTTTTTC
aroK(SL1344_3454)	STnc870(ncRNA0205)	-	3664326	3664363	3664301	3664308	+	4292567	4292598	4292539	4292544	11	8.55984	1.68e-07	5UTR	sRNA	TCGCAATATCTTATGAGGTTTCAGTTCATGTCCTGCTGCGCTGGGTGTCTGTGAAGCGGGTTT	TGTTTTCCTTGCCATAGACACCATCCCTGTCTTCCCCCACATGATGTGGGGGTTTTTTTT
aroP(SL1344_0150)	RprA(ncRNA0058)	-	174829	174870	174808	174808	-	1401684	1401708	1401730	1401732	37	432.363	5.1e-37	5UTR	sRNA	ACGAGCTTGTAAATAAATCAATACAAAAAGCGGAATTGCAAACTTACACACGCACTACTGCAT	GAATTGCTGTGTGTAGTCTTTGCCCGTCTCCTACGATGGGCTTTTTTTT
aroQ(SL1344_1204)	ArcZ(ncRNA0002)	+	1306688	1306740	1306755	1306765	+	3511915	3511919	3511860	3511862	31	16.8625	5.39e-25	CDS	sRNA	TAAAAGGAGGTTGATTAATGATTCGTCATATCGCCATTTTTCTTTGTTCTTTATTGATGTGCAGCACCACTTTTGCCG	ATTTCCCTGGTGTTGGCGCAGTATTCGCGCACCCCGGTCAAACCGGGGTCATTTTTTTTC
artI(SL1344_0866)	RprA(ncRNA0058)	-	960240	960302	960170	960229	-	1401682	1401711	1401721	1401733	544	249.322	0	CDS	sRNA	AGATTCGGGACAATGACAATGAAAAAAGTTCTGATTGCCGCGCTAATTGCAGGCTTTAGCCTTTCCGCTACAGCAGCCCAGACCATTCGTTTTGCGACCGAAGCGTCCTATCCGCCGTTCGAATCGATGGATG	CGAATTGCTGTGTGTAGTCTTTGCCCGTCTCCTACGATGGGCTTTTTTTTTA
artQ(SL1344_0865)	SdsR(ncRNA0070)	-	959519	959536	959477	959481	-	1925620	1925665	1925693	1925696	23	3.87427	3.01e-07	CDS	sRNA	TTTTTCCTTTAGCAAGCGCCGCCGGGATGACCGTCGGCCTTGCCGTCTGTGCGCTGATCA	CCAACTTTTAGCGCACGGCTCTCTCCCAAGAGCCATTTCCCTGGACCGAATACAGGAATCGTATTCGGTCTCTTTTT
asarfA(ncRNA0103)	InvR(ncRNA0023)	+	3603141	3603187	3603202	3603239	+	3067566	3067588	3067521	3067546	46	3.77853	3.46e-13	sRNA	sRNA	CGAAATCCGCGATCTGCTGAAAGAACAAAATAACCGTTCTTAATAAGCAGAAGGCCAGTGGTAAAAAAGTGATTCACTTTCTTGCCACTGGCCTCCCAG	TGTCTCTTACGTTGCATTTATCAATCTGCTTTTTGATACAGCAGCACCTCGCTGCTGCTTTTTTTATT
asd(SL1344_3506)	RprA(ncRNA0058)	-	3731096	3731115	3731075	3731076	-	1401682	1401687	--	1401736	54	98.8924	1.13e-38	5UTR	sRNA	GATGCGCCACAGGATACTGGCGCGCATACACAGCACATCTC	CAACGAATTGCTGTGTGTAGTCTTTGCCCGTCTCCTACGATGGGCTTTTTTTTTA
[truncated: 1,631 more rows]
