# Supplementary material for: In vivo RNA interactome profiling reveals 3’UTR-processed small RNA targeting a central regulatory hub
Source: Research Square preprint supplement (doi:10.21203/rs.3.rs-3125059/v1), 2023-07-24
Supplement: Supplementary file 5 [file cc338cbad101f0dec3b4dfb5.xlsx]

## Sheet: Table S4
Table S7. Genes with 3UTRs located in RNA2
Gene	Strand	From	To	Sequence	Secondary Structure
frdD(SL1344_4277)	-	4603012	4603058	GTTGCCACGACGCCCTCTTATCTACCCGATAAGAGGGCATTTTTTCT
SL1344_1990(SL1344_1990)	-	2091877	2091808	AGATTTTAGTTTCGGGATATCCTGGTGAGTCCGGAGACGTTTAAAAAACAATAAATTATCTTTACCCGGTTGACCTGAGAAGGTTTACCGGGTTTTTTGA
uhpT(SL1344_3753)	-	4007442	4007501	ATATCGCTTAAATGTGTGCATTTGGTAACGTTTTGCCCGGCTTAACGCCGGGCTTTTTAT
udp(SL1344_3922)	+	4197164	4197216	CTGTAATTCTCCTCTCTTTTGCAAAGGCCGACGCGTTCGGCCTTTTCTTTTTG
rplQ(SL1344_3381)	-	3604318	3604407	ATCGAGCTGGTTGATCGTTCAGAGAAAACAGAAGCTGCTGCAGAGTAATCTGTAGTAACGTAAAAAAACCCGCTTCGGCGGGTTTTTTTA
pepN(SL1344_0997)	+	1103057	1103137	ACTAAAGCGTTAGCCTGACAGTATCCGTTATAAAGAGGTAAGACATGCCCGGTAAGCGTTAGCGCTGCCGGGCATTTTTTT
rpl19(SL1344_2646)	-	2825991	2826112	CTGCGTGAGCGTACTGGTAAAGCGGCTCGTATCAAAGAGCGTCTTAACTGATAACGCATTCACGCTACATCCAAAGCGTGTTGTAAAACAAGGGGTTAGCGAATTGCTGACCCCTTTTTTAT
glmS(SL1344_3828)	-	4090294	4090359	GTTACCGTAGAGTAAGTACAAATGTAGTACCAGGCAGAAGGCCGTCGACAGACGGCCTTTTTTTGT
rpsI(SL1344_3316)	-	3533763	3533838	TTCTCCAAACGTTAATGGGGTTCTGCTTCGGCAGACAACTGTTAGCGAAAAAACCCGCTTCGGCGGGTTTTTTTAT
SL1344_0670(SL1344_0670)	+	750726	750784	GCAATAAAACCCTGCCTTGCCACCCACGGGCGAATGTTTTCCGCCCGTGGTTTTTTCAG
SL1344_3867(SL1344_3867)	+	4137886	4137930	TTCCAGAACGCATCAATTAGCGGCTCATGCAGCCGCTTTTTTTGC
SL1344_2409(SL1344_2409)	-	2555216	2555254	CATAAAAATGCCCATCCCCGCCTCCGCGGGGATTTTTTT
rph(SL1344_3700)	-	3947959	3947999	AAAATTGATTTTAAGGCGACTGAAAAGTCGCCTTTTTTTTG
ahpF(SL1344_0597)	+	672295	672386	AAAATCGCATAAAAAGAAGTAAGCACACCTGCAAGGCCAGTTAACTGGCCATCGTAAATGGCCCGATAGTGTAAGCTATTCGGGCCTGCGGT
cspE(SL1344_0617)	+	692612	692666	GCATACGTCCGACAGCAAGATTTCAAAACCCGCCCTTTCGGCGGGTTTTTTTTGC
SL1344_3819(SL1344_3819)	+	4081266	4081305	TGTAGGCCCGGTAAGCGCAGCGCCACCGGGCAAAAGAATG
fabA(SL1344_1007)	-	1114144	1114216	TATTCCGCGCTATCGGTATCATGCTTGCAAAGCCCATAAAGGCGAAACCTCCGCACTGCGGAGGTTTCTTTTT
SL1344_3664(SL1344_3664)	+	3915348	3915416	ATTGTCCACATTGCGAATTCTTCGCTCCGCTGTTCCGGGATTGCACTCCATCGGAACAGCGTTTTTTAG
